# Supplementary material for: Bromide-catalyzed oxo-amination of alkenes towards the synthesis of α-amine ketones under photoelectrocatalysis conditions
Source: Royal Society of Chemistry journal article supplement (doi:10.1039/d4qo00369a), 2024-01-01

## Supporting Information

### **Bromide-catalyzed oxo-amination of alkenes towards the synthesis of $\alpha$ -amine ketones under photoelectrocatalysis conditions**

Zhi-Min Zong <sup>a</sup>, Mingxu Wang <sup>a</sup>, Xiao-Jing Zhao <sup>a,\*</sup>, Yonghui He <sup>a,\*</sup>

Key Laboratory of Chemistry in Ethnic Medicinal Resources, School of Ethnic Medicine, Yunnan  
Minzu University, Kunming, 650500, China

E-mail: [heyonghui@ymu.edu.cn](mailto:heyonghui@ymu.edu.cn), [zhaobj@ymu.edu.cn](mailto:zhaobj@ymu.edu.cn)

## Table of Contents

|                                                         |     |
|---------------------------------------------------------|-----|
| 1. General information.....                             | S1  |
| 2. General procedure for the synthesis of products..... | S2  |
| 3. Cyclic voltammetry experiments.....                  | S5  |
| 4. Stern-Volmer Fluorescence Quenching Experiments..... | S7  |
| 4. Analytical data.....                                 | S8  |
| 5. Crystal of <b>3ia</b> .....                          | S29 |
| 6. Copies of NMR spectra.....                           | S31 |

## 1. General information

All glassware were oven dried at 110 °C for several hours and cooled down under vacuum. Unless otherwise noted, materials were obtained from commercial suppliers and used without further purification. **The instrument for electrolysis** was dual display potentiostat (DJS-292B) (made in China). Both of the anode electrode and cathodic electrode were platinum plates (10 mm×10 mm×0.2 mm). Thin-layer chromatography was performed with EMD silica gel 100 F254 plates eluting with solvents indicated, visualized by a 254 nm UV lamp and stained with phosphomolybdic acid (PMA). Flash chromatography columns were packed with 60-100 mesh silica gel in petroleum (bp. 60-90 °C). **<sup>1</sup>H NMR, <sup>13</sup>C NMR and <sup>19</sup>F NMR** spectra were obtained on Bruker Advance III (400 MHz). Chemical shifts were denoted in ppm (δ), and calibrated by using residual undeuterated solvent CDCl<sub>3</sub> (7.26 ppm), tetramethylsilane (0.00 ppm) as internal reference for <sup>1</sup>H NMR and the deuterated solvent CDCl<sub>3</sub> (77.16 ppm) tetramethylsilane (0.00 ppm) as internal standard for <sup>13</sup>C NMR; solvent *d*<sub>6</sub>-DMSO (2.50 ppm), tetramethylsilane (0.00 ppm) as internal reference for <sup>1</sup>H NMR and the deuterated solvent *d*<sub>6</sub>-DMSO (39.52 ppm) tetramethylsilane (0.00 ppm) as internal standard for <sup>13</sup>C NMR, multiplicities are as indicated: s = singlet, d = doublet, t = triplet, q = quartet, m = multiplet. **High-resolution mass spectral analysis (HRMS) data** was measured on a Waters Acquity UPLC I-Class plus Xevo G2-XS (Q-TOF) mass spectrum by means of the ESI technique. **Crystallographic data** were obtained from a Bruker D8 Quest diffractometer. The compounds **1** and **2** were all purchased.

## 2. General procedure for the synthesis of products

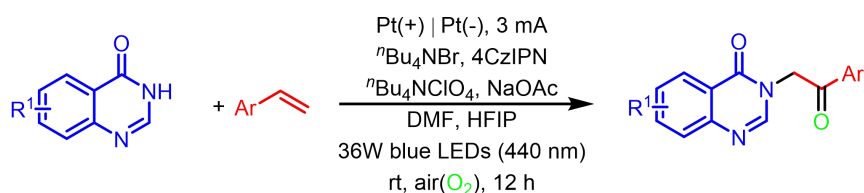

General procedure for the preparation of **3**: Unless otherwise noted, reactions were conducted using: Pt plate anode (10 mm × 10 mm × 0.2 mm), Pt plate cathode (10 mm × 10 mm × 0.2 mm), constant current = 3 mA, **1** (0.2 mmol), **2** (0.4 mmol),  ${}^t\text{Bu}_4\text{NBr}$  (10 mol%), 4CzIPN (2 mol%),  ${}^t\text{Bu}_4\text{NClO}_4$  (0.4 mmol), NaOAc (0.4 mmol), HFIP (0.4 mmol), DMF (3.0 mL), room temperature, undivided cell. Then stirred for 12 h. The resulting brown mixture was concentrated under a vacuum, the crude product was purified by flash column chromatography using petroleum ether/EtOAc (3:1) to give the title compounds **3**.

### The control experiments.

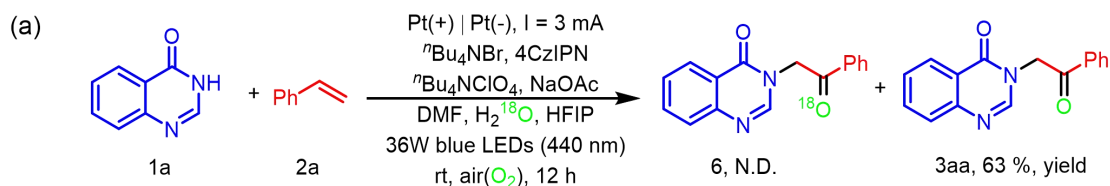

Unless otherwise noted, reactions were performed: **1a** (0.2 mmol, 29.2 mg), **2a** (0.4 mmol, 41.7 mg, 46.0  $\mu\text{L}$ ),  ${}^t\text{Bu}_4\text{NBr}$  (10 mol%, 6.4 mg), 4CzIPN (2 mol%, 3.2 mg),  ${}^t\text{Bu}_4\text{NClO}_4$  (0.4 mmol, 136.8 mg), NaOAc (0.4 mmol, 32.8 mg), HFIP (0.4 mmol, 67.2 mg, 42.0  $\mu\text{L}$ ),  $\text{H}_2^{18}\text{O}$  (0.8 mmol, 16.0 mg, 16.0  $\mu\text{L}$ ) were added to DMF (3.0 mL) under air atmosphere at room temperature. Then stirred for 12 h. The resulting yellow mixture was concentrated under vacuum, the crude product was purified by flash column chromatography using petroleum ether/ EtOAc (3:1) to give the compound and detected by HRMS.

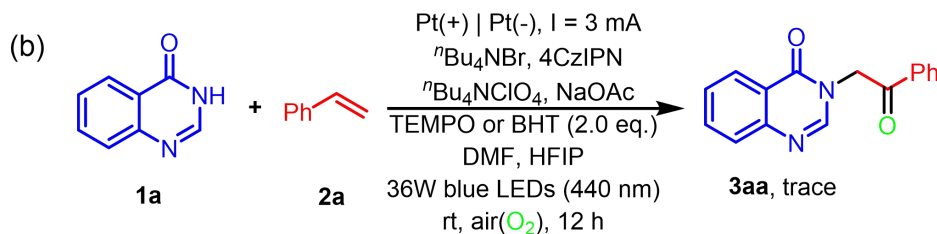

Unless otherwise noted, reactions were performed: **1a** (0.2 mmol, 29.2 mg), **2a** (0.4 mmol, 41.7 mg, 46.0  $\mu\text{L}$ ),  ${}^t\text{Bu}_4\text{NBr}$  (10 mol%, 6.4 mg), 4CzIPN (2 mol%, 3.2 mg),  ${}^t\text{Bu}_4\text{NClO}_4$  (0.4 mmol, 136.8 mg), NaOAc (0.4 mmol, 32.8 mg), HFIP (0.4 mmol, 67.2 mg, 42.0  $\mu\text{L}$ ), TEMPO (0.4 mmol,

62.5 mg) (or BHT (0.4 mmol, 88.1 mg)) were added to DMF (3.0 mL) under air atmosphere at room temperature. Then stirred for 12 h. Detected by HRMS.

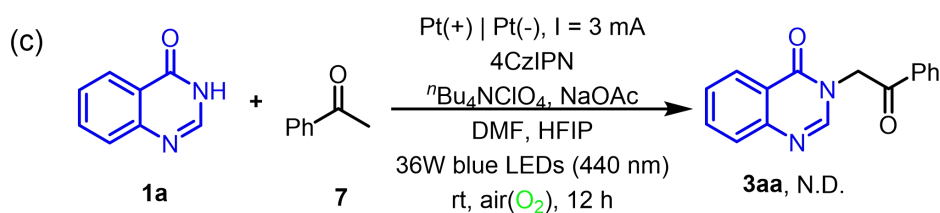

Unless otherwise noted, reactions were performed: **1a** (0.2 mmol, 29.2 mg), **7** (0.4 mmol, 48.1 mg, 47.0  $\mu\text{L}$ ), 4CzIPN (2 mol%, 3.2 mg),  ${}^t\text{Bu}_4\text{NClO}_4$  (0.4 mmol, 136.8 mg), NaOAc (0.4 mmol, 32.8 mg), HFIP (0.4 mmol, 67.2 mg, 42.0  $\mu\text{L}$ ) were added to DMF (3.0 mL) under air atmosphere at room temperature. Then stirred for 12 h. Detected by HRMS.

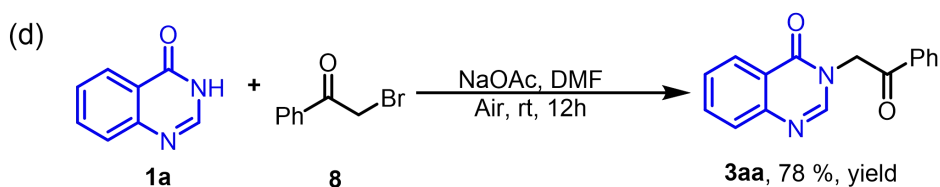

Unless otherwise noted, reactions were performed: **1a** (0.2 mmol, 29.2 mg), **8** (0.4 mmol, 79.6 mg), NaOAc (0.4 mmol, 32.8 mg) were added to DMF (3.0 mL) under air atmosphere at room temperature. Then stirred for 12 h. The resulting yellow mixture was concentrated under vacuum, the crude product was purified by flash column chromatography using petroleum ether/ EtOAc (3:1) to give the compound **3aa**.

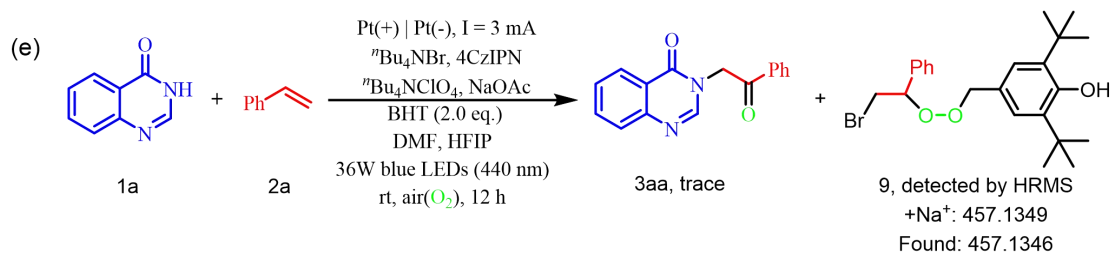

Unless otherwise noted, reactions were performed: **1a** (0.2 mmol, 29.2 mg), **2a** (0.4 mmol, 41.7 mg, 46.0  $\mu\text{L}$ ),  ${}^t\text{Bu}_4\text{NBr}$  (10 mol%, 6.4 mg), 4CzIPN (2 mol%, 3.2 mg),  ${}^t\text{Bu}_4\text{NClO}_4$  (0.4 mmol, 136.8 mg), NaOAc (0.4 mmol, 32.8 mg), HFIP (0.4 mmol, 67.2 mg, 42.0  $\mu\text{L}$ ), BHT (0.4 mmol, 88.1 mg) were added to DMF (3.0 mL) under air atmosphere at room temperature. Then stirred for 12 h. Detected by HRMS.

Item name: zzm-204 Channel name: 1: RT=0.4468 mins : TOF MS<sup>E</sup> (50-1200...

Item description:

2.44e3

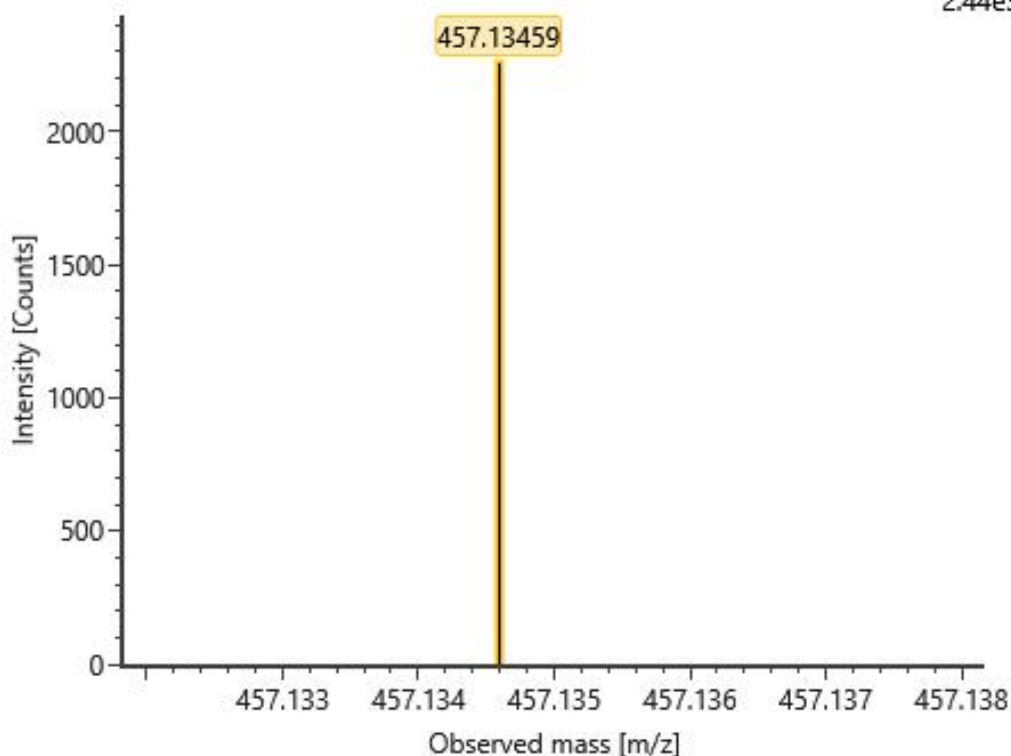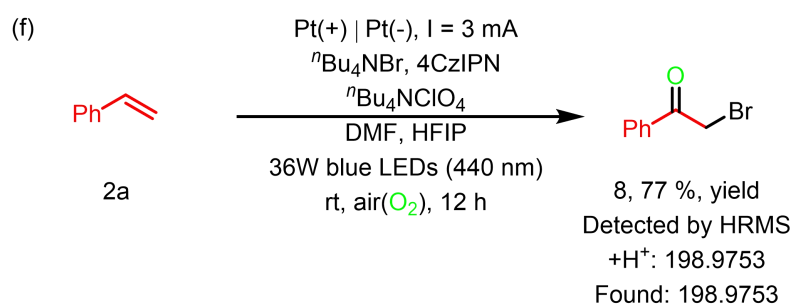

Unless otherwise noted, reactions were performed: **2a** (0.4 mmol, 41.7 mg, 46.0  $\mu\text{L}$ ),  $n\text{Bu}_4\text{NBr}$  (0.4 mmol, 128.9 mg), 4CzIPN (2 mol%, 3.2 mg),  $n\text{Bu}_4\text{NClO}_4$  (0.4 mmol, 136.8 mg), HFIP (0.4 mmol, 67.2 mg, 42.0  $\mu\text{L}$ ), were added to DMF (3.0 mL) under air atmosphere at room temperature. Then stirred for 12 h. The resulting yellow mixture was concentrated under vacuum, the crude product was purified by flash column chromatography using petroleum ether/ EtOAc (30:1) to give the compound. Detected by HRMS and NMR.

Item name: wmx Channel name: 1: RT=0.4006 mins : TOF MS<sup>E</sup> (50-1000) 6...  
Item description:

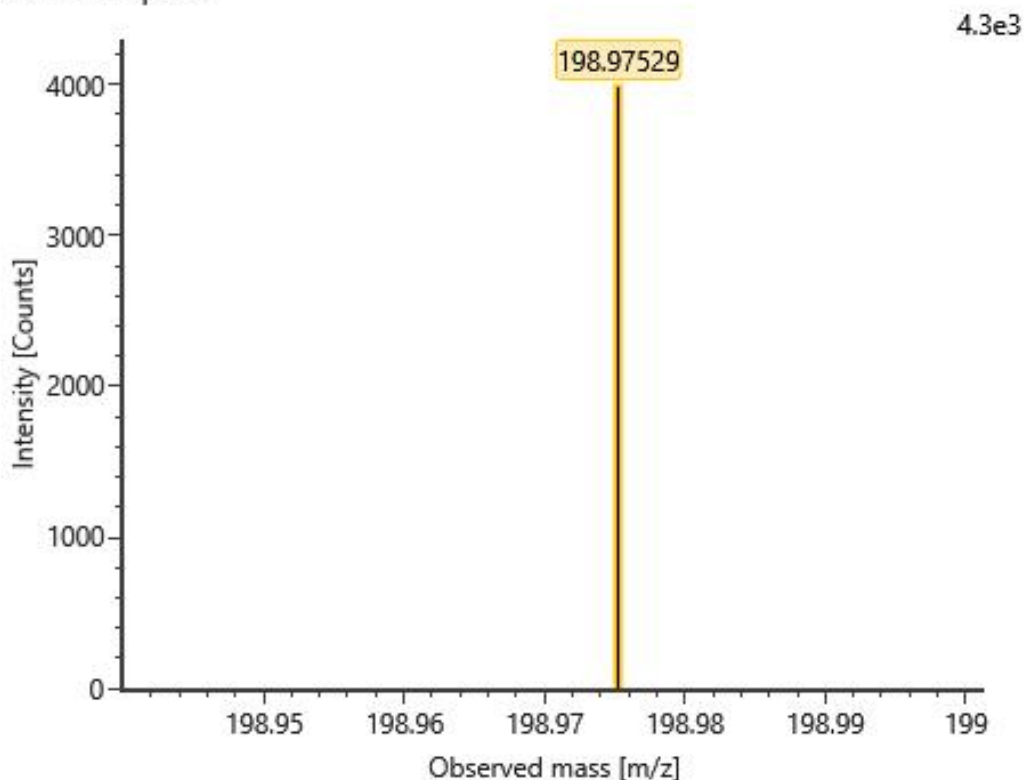

### Gram-scale reaction.

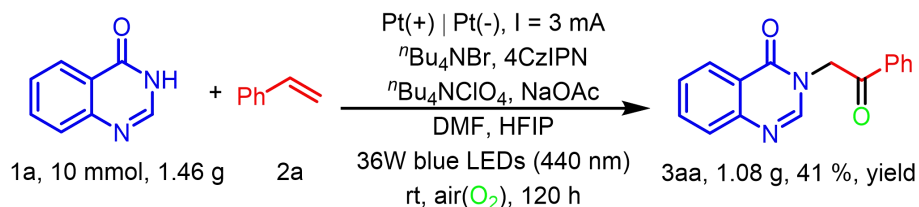

Unless otherwise noted, reactions were performed: **1a** (10.0 mmol, 1.46 g), **2a** (20 mmol, 2.08 g, 2.3 mL), <sup>n</sup>Bu<sub>4</sub>NBr (10 mol%, 322.4 mg), 4CzIPN (2 mol%, 160.0 mg), <sup>n</sup>Bu<sub>4</sub>NClO<sub>4</sub> (10 mmol, 3.4 g), NaOAc (20 mmol, 0.7 g), HFIP (20 mmol, 3.36 g, 0.8 mL) were added to DMF (30 mL) under air atmosphere at room temperature. Then stirred for 120 h. The resulting yellow mixture was concentrated under vacuum, the crude product was purified by flash column chromatography using petroleum ether/ EtOAc (3:1) to give the compound **3aa**.

### 3. Cyclic voltammetry experiments

Before the experiment, the glassy carbon disk electrode ( $\approx 5.0 \text{ mm}^2$ ) was polished step by step with metallographic sandpaper from 28  $\mu\text{m}$  to 3.5  $\mu\text{m}$ , and then polished to the mirror surface with 1.0, 0.3  $\mu\text{m}$  Al<sub>2</sub>O<sub>3</sub> slurry on the suede in turn. After each polishing, the surface dirt was washed first, and then moved into the ultrasonic water bath for cleaning, every 2 ~ 3 min, repeated three

times, and finally followed by ultrasonic cleaning with 1 : 1 ethanol, 1 : 1 HNO<sub>3</sub> and distilled water. After thorough washing, the electrode was activated by cyclic voltammetry in 0.5-1.0 mol / L H<sub>2</sub>SO<sub>4</sub> solution. The scan range was 1.0 ~ -1.0V, and the scan was repeated until a stable cyclic voltammogram was reached. Finally, the cyclic voltammetry curve of 1 × 10<sup>-3</sup> mol / L K<sub>3</sub>Fe(CN)<sub>6</sub> solution was recorded in 0.20 mol / L KNO<sub>3</sub> to test the electrode performance. The scanning speed was 50 mV / s and the scanning range was -0.2 ~ 0.6 V. The peak potential difference in the cyclic voltammogram obtained under laboratory conditions is below 80 mV, and as close as possible to 64 mV, the electrode can be used, otherwise the electrode should be reprocessed until it meets the requirements.

Cyclic voltammetry was performed in a three-electrode cell connected to a schlenk line under nitrogen at room temperature. The working electrode was a steady glassy carbon disk electrode (≈5.0 mm<sup>2</sup>), the counter electrode a platinum wire. The reference was an Ag/AgNO<sub>3</sub> electrode submerged in 0.1 M <sup>n</sup>Bu<sub>4</sub>NClO<sub>4</sub> and 0.01 M AgNO<sub>3</sub> in CH<sub>3</sub>CN. 3 mL of DMF were poured into the electrochemical cell in all experiments. The redox potential of ferrocene/ferrocenium (Fc/Fc<sup>+</sup>) was measured (same experimental conditions) and used to provide an internal reference. The potential values were then adjusted relative to Fc/Fc<sup>+</sup>. The scan rate is 0.1 V/s, ranging from -0.2 V to 2.0 V.

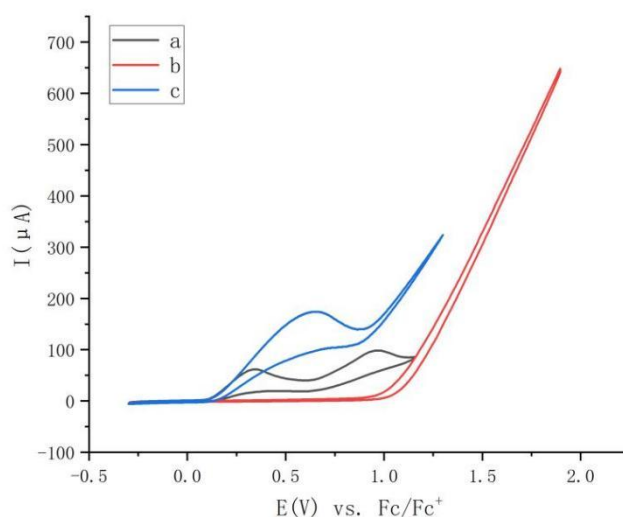

**Figure S1.** CV plotting convention (IUPAC)

In the **figure S1**, cyclic voltammograms of in 3 mL of DMF solution containing different compounds: (A) tetrabutylammonium perchlorate (0.4 mmol), tetrabutylammonium bromide (0.02



mmol); (B) tetrabutylammonium perchlorate (0.4 mmol), styrene (0.4 mmol); (C) tetrabutylammonium perchlorate (0.4 mmol), tetrabutylammonium bromide (0.02 mmol), styrene (0.4 mmol); with a GC disk working electrode ( $\approx 5.0 \text{ mm}^2$ ), Pt counter electrode, and Ag/AgNO<sub>3</sub> reference electrode (internal solution, 0.1 M <sup>n</sup>Bu<sub>4</sub>NClO<sub>4</sub> and 0.01 M AgNO<sub>3</sub> in CH<sub>3</sub>CN) at 0.1 V/s scan rate.

#### 4. Stern-Volmer Fluorescence Quenching Experiments

Fluorescence spectra samples for the quenching experiments were prepared in a glass cuvette with a septum screw cap. 4CzIPN was irradiated at 470 nm and the emission intensity at 532 nm was observed. In a typical experiment, the emission spectrum of a  $1.0 \times 10^{-5} \text{ M}$  solution of 4CzIPN in DMF was collected. A stock solution of <sup>n</sup>Bu<sub>4</sub>NBr (32.2 mg, 0.1 mmol) in 1 ml of DMF was prepared. Then, different amounts of this stock solution were added to a solution of the photocatalyst in DMF ( $1.0 \times 10^{-5} \text{ M}$ ). As shown in **Figure S2**, a decrease of 4CzIPN luminescence was observed, suggesting that the mechanism might operate via a canonical photo-redox cycle consisting of a reductive quenching with <sup>n</sup>Bu<sub>4</sub>NBr.

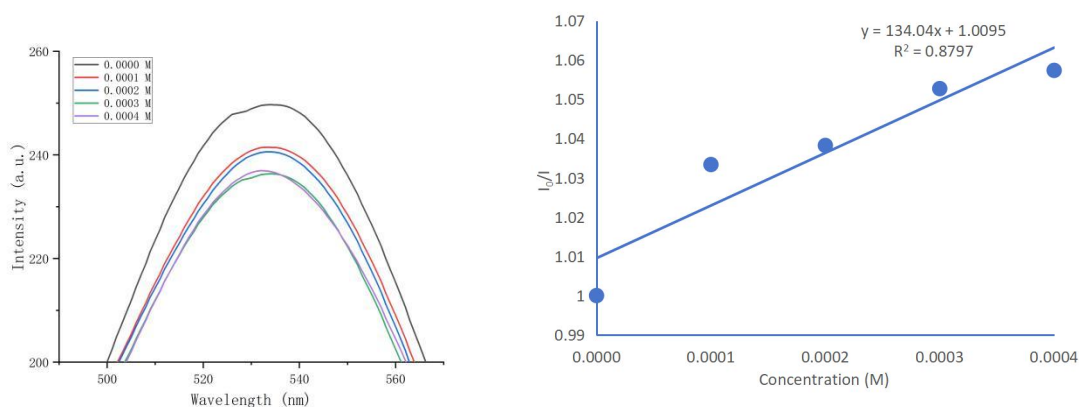

**Figure S2.** Stern–Volmer fluorescence quenching experiments of 4CzIPN with <sup>n</sup>Bu<sub>4</sub>NBr.

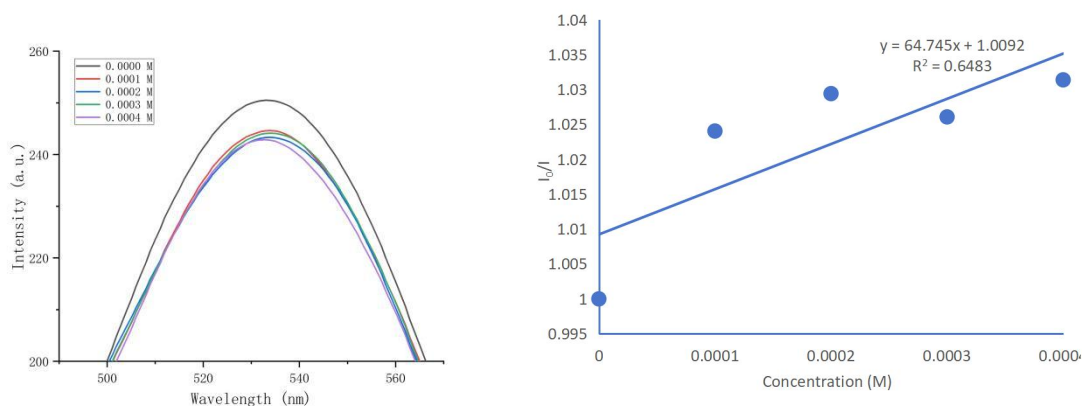

**Figure S3.** Stern–Volmer fluorescence quenching experiments of 4CzIPN with NaOAc.

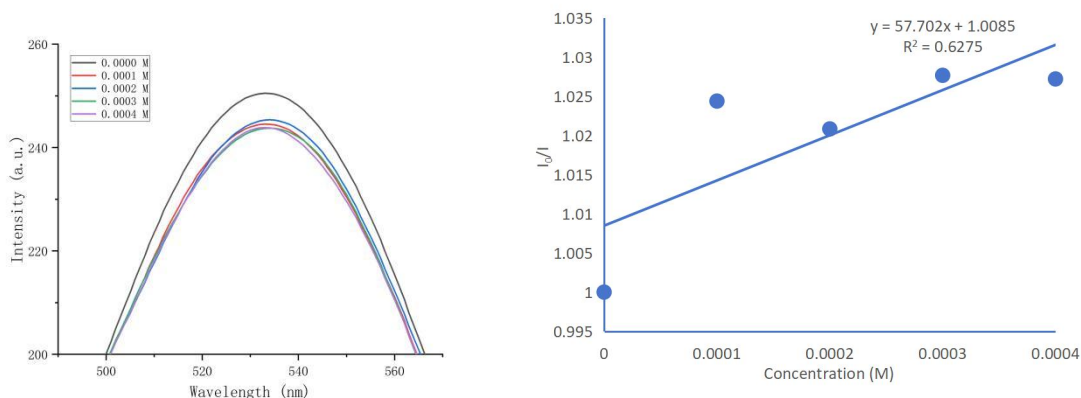

**Figure S4.** Stern–Volmer fluorescence quenching experiments of 4CzIPN with styrene.

#### 4. Analytical data

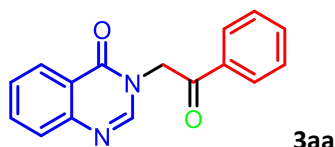

#### 3-(2-oxo-2-phenylethyl)quinazolin-4(3H)-one (3aa)

According to the general procedure, **3aa** was obtained using quinazolin-4(3H)-one **1a** (29.2 mg, 0.2 mmol) and styrene **2a** (41.7 mg, 46.0  $\mu$ L, 0.4 mmol) in 68% yield (35.9 mg) as a white solid (silica gel flash chromatography: petroleum ether/EtOAc = 3:1).

$^1\text{H NMR}$  (400 MHz, DMSO- $d_6$ )  $\delta$ : 8.41 (s, 1H), 8.16 (dd,  $J$  = 8.0, 1.6 Hz, 1H), 8.12–8.09 (m, 2H), 7.89–7.85 (m, 1H), 7.76–7.72 (m, 2H), 7.63–7.56 (m, 3H), 5.69 (s, 2H);

$^{13}\text{C NMR}$  (100 MHz, DMSO- $d_6$ )  $\delta$ : 192.9, 160.2, 148.4, 148.1, 134.6, 134.3, 134.2, 129.1, 128.1, 127.4, 127.2, 126.1, 121.4, 52.2.

**HRMS (ESI)** calcd for  $\text{C}_{16}\text{H}_{12}\text{N}_2\text{NaO}_2$ :  $[\text{M}+\text{Na}]^+$  287.0791. Found:  $m/z$  287.0793.

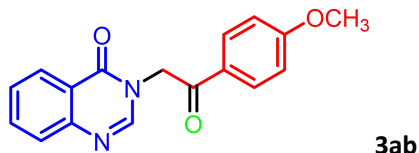

#### 3-(2-(4-methoxyphenyl)-2-oxoethyl)quinazolin-4(3H)-one (3ab)

According to the general procedure, **3ab** was obtained using quinazolin-4(3H)-one **1a** (29.2 mg, 0.2 mmol) and 1-methoxy-4-vinylbenzene **2b** (54.7 mg, 53.5  $\mu$ L, 0.4 mmol) in 69% yield (40.6 mg) as a white solid (silica gel flash chromatography: petroleum ether/EtOAc = 1:1).

**<sup>1</sup>H NMR** (400 MHz, CDCl<sub>3</sub>) δ: 8.29-8.26 (m, 1H), 8.02-7.99 (m, 2H), 7.98 (s, 1H), 7.79-7.72 (m, 2H), 7.51-7.47 (m, 1H), 6.98-6.96 (m, 2H), 5.38 (s, 2H), 3.88 (s, 3H);

**<sup>13</sup>C NMR** (100 MHz, CDCl<sub>3</sub>) δ: 190.1, 164.5, 161.2, 148.4, 146.9, 134.5, 130.7, 127.7, 127.5, 127.4, 126.9, 122.1, 114.3, 55.7, 51.0.

**HRMS (ESI)** calcd for C<sub>17</sub>H<sub>14</sub>N<sub>2</sub>NaO<sub>3</sub>: [M+Na]<sup>+</sup> 317.0897. Found: m/z 317.0903.

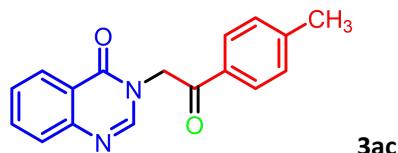

### 3-(2-oxo-2-(p-tolyl)ethyl)quinazolin-4(3H)-one (3ac)

According to the general procedure, **3ac** was obtained using quinazolin-4(3H)-one **1a** (29.2 mg, 0.2 mmol) and 1-methoxy-4-vinylbenzene **2c** (47.3 mg, 53.0 μL, 0.4 mmol) in 63% yield (35.0 mg) as a white solid (silica gel flash chromatography: petroleum ether/EtOAc = 2:1).

**<sup>1</sup>H NMR** (400 MHz, CDCl<sub>3</sub>) δ: 8.30-8.27 (m, 1H), 7.97 (s, 1H), 7.95-7.92 (m, 2H), 7.80-7.73 (m, 2H), 7.52-7.48 (m, 1H), 7.32-7.30 (m, 2H), 5.41 (s, 2H), 2.43 (s, 3H);

**<sup>13</sup>C NMR** (100 MHz, CDCl<sub>3</sub>) δ: 191.3, 161.2, 148.3, 146.8, 145.6, 134.6, 132.0, 129.8, 128.4, 127.7, 127.5, 127.0, 122.1, 51.3, 21.9.

**HRMS (ESI)** calcd for C<sub>17</sub>H<sub>14</sub>N<sub>2</sub>NaO<sub>2</sub>: [M+Na]<sup>+</sup> 301.0947. Found: m/z 301.0950.

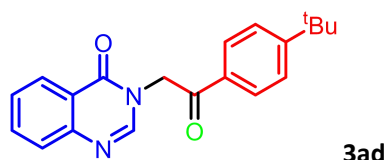

### 3-(2-(4-(tert-butyl)phenyl)-2-oxoethyl)quinazolin-4(3H)-one (3ad)

According to the general procedure, **3ad** was obtained using quinazolin-4(3H)-one **1a** (29.2 mg, 0.2 mmol) and 1-methoxy-4-vinylbenzene **2d** (64.1 mg, 73.5 μL, 0.4 mmol) in 77% yield (49.3 mg) as a white solid (silica gel flash chromatography: petroleum ether/EtOAc = 3:1).

**<sup>1</sup>H NMR** (400 MHz, CDCl<sub>3</sub>) δ: 8.29-8.27 (m, 1H), 7.99-7.96 (m, 3H), 7.77-7.72 (m, 2H), 7.54-7.49 (m, 3H), 5.41 (s, 2H), 1.35 (s, 9H);

**<sup>13</sup>C NMR** (100 MHz, CDCl<sub>3</sub>) δ: 191.3, 161.1, 158.4, 148.3, 146.9, 134.6, 132.0, 128.3, 127.7, 127.4, 127.0, 126.1, 122.1, 51.3, 35.4, 31.1.

**HRMS (ESI)** calcd for  $C_{20}H_{20}N_2NaO_2$ :  $[M+Na]^+$  343.1417. Found:  $m/z$  343.1416.

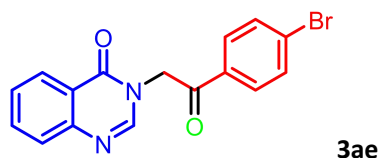

**3-(2-(4-bromophenyl)-2-oxoethyl)quinazolin-4(3H)-one (3ae)**

According to the general procedure, **3ae** was obtained using quinazolin-4(3H)-one **1a** (29.2 mg, 0.2 mmol) and 1-bromo-4-vinylbenzene **2e** (73.2 mg, 52.5  $\mu$ L, 0.4 mmol) in 58% yield (39.7 mg) as a white solid (silica gel flash chromatography: petroleum ether/EtOAc = 3:1).

**$^1H$  NMR** (400 MHz,  $CDCl_3$ )  $\delta$ : 8.29-8.27 (m, 1H), 7.97 (s, 1H), 7.92-7.88 (m, 2H), 7.81-7.74 (m, 2H), 7.69-7.66 (m, 2H), 7.54-7.50 (m, 1H), 5.38 (s, 2H);

**$^{13}C$  NMR** (101 MHz,  $CDCl_3$ )  $\delta$ : 191.0, 161.1, 148.3, 146.5, 134.7, 133.2, 132.6, 129.9, 129.8, 127.8, 127.6, 127.0, 122.0, 51.3.

**HRMS (ESI)** calcd for  $C_{16}H_{11}BrN_2NaO_2$ :  $[M+Na]^+$  364.9896. Found:  $m/z$  364.9896.

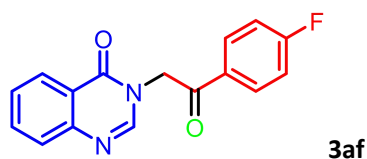

**3-(2-(4-fluorophenyl)-2-oxoethyl)quinazolin-4(3H)-one (3af)**

According to the general procedure, **3af** was obtained using quinazolin-4(3H)-one **1a** (29.2 mg, 0.2 mmol) and 1-fluoro-4-vinylbenzene **2f** (48.9 mg, 48.0  $\mu$ L, 0.4 mmol) in 56% yield (31.6 mg) as a white solid (silica gel flash chromatography: petroleum ether/EtOAc = 3:1).

**$^1H$  NMR** (400 MHz,  $CDCl_3$ )  $\delta$ : 8.29-8.27 (m, 1H), 8.10-8.06 (m, 2H), 7.97 (s, 1H), 7.80-7.73 (m, 2H), 7.53-7.49 (m, 1H), 7.23-7.18 (m, 2H), 5.39 (s, 2H);

**$^{13}C$  NMR** (100 MHz,  $CDCl_3$ )  $\delta$ : 190.3, 166.6 (d,  $J = 256.0$  Hz), 161.2, 148.4, 146.6, 134.7, 131.1 (d,  $J = 9.0$  Hz), 127.8, 127.6, 126.9, 122.0, 116.6, 116.3, 51.3.

**$^{19}F$  NMR** (376 MHz,  $CDCl_3$ )  $\delta$ : -102.42.

**HRMS (ESI)** calcd for  $C_{16}H_{12}FN_2O_2$ :  $[M+H]^+$  283.0877. Found:  $m/z$  283.0868.

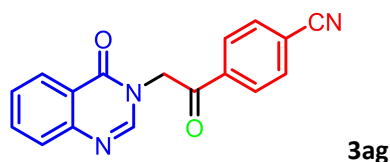

#### 4-(2-(4-oxoquinazolin-3(4H)-yl)acetyl)benzonitrile (**3ag**)

According to the general procedure, **3ag** was obtained using quinazolin-4(3H)-one **1a** (29.2 mg, 0.2 mmol) and 4-vinylbenzonitrile **2g** (51.7 mg, 48.0  $\mu$ L, 0.4 mmol) in 41% yield (2 3.7 mg) as a white solid (silica gel flash chromatography: petroleum ether/EtOAc = 1:5).

<sup>1</sup>H NMR (400 MHz, DMSO-*d*<sub>6</sub>)  $\delta$ : 8.40 (s, 1H), 8.25 (d, *J* = 8.0 Hz, 2H), 8.16-8.13 (m, 1H), 8.11 (d, *J* = 8.0 Hz, 2H), 7.90-7.86 (m, 1H), 7.74 (d, *J* = 8.0 Hz, 1H), 7.58 (t, *J* = 7.6 Hz, 1H), 5.73 (s, 2H);

<sup>13</sup>C NMR (100 MHz, DMSO-*d*<sub>6</sub>)  $\delta$ : 192.6, 160.2, 148.2, 148.1, 137.5, 134.7, 133.1, 128.8, 127.4, 127.4, 126.1, 121.4, 118.1, 116.1, 52.6.

HRMS (ESI) calcd for C<sub>17</sub>H<sub>12</sub>N<sub>3</sub>O<sub>2</sub>: [M+H]<sup>+</sup> 290.0924. Found: m/z 290.0923

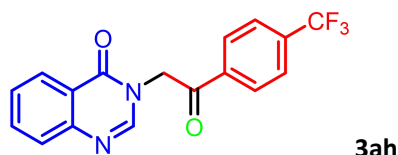

#### 3-(2-oxo-2-(4-(trifluoromethyl)phenyl)ethyl)quinazolin-4(3H)-one (**3ah**)

According to the general procedure, **3ah** was obtained using quinazolin-4(3H)-one **1a** (29.2 mg, 0.2 mmol) and 1-(trifluoromethyl)-4-vinylbenzene **2h** (68.9 mg, 59.0  $\mu$ L, 0.4 mmol) in 30% yield (19.9 mg) as a white solid (silica gel flash chromatography: petroleum ether/EtOAc = 1:1).

<sup>1</sup>H NMR (400 MHz, DMSO-*d*<sub>6</sub>)  $\delta$ : 8.40 (s, 1H), 8.30 (d, *J* = 8.0 Hz, 2H), 8.16-8.14 (m, 1H), 7.99 (d, *J* = 8.0 Hz, 2H), 7.90-7.86 (m, 1H), 7.74 (d, *J* = 8.4 Hz, 1H), 7.60-7.56 (m, 1H), 7.74 (s, 2H);

<sup>13</sup>C NMR (100 MHz, DMSO-*d*<sub>6</sub>)  $\delta$ : 192.6, 160.2, 148.2 (d, *J* = 13.0 Hz), 137.5, 134.7, 133.4 (q, *J* = 31.0 Hz), 129.1, 127.4 (d, *J* = 4.0 Hz), 126.1, 126.1, 126.1, 126.0, 123.7 (q, *J* = 272.0 Hz), 121.4, 52.5.

<sup>19</sup>F NMR (376 MHz, DMSO-*d*<sub>6</sub>)  $\delta$ : -61.70.

HRMS (ESI) calcd for C<sub>17</sub>H<sub>11</sub>F<sub>3</sub>N<sub>2</sub>NaO<sub>2</sub>: [M+Na]<sup>+</sup> 355.0665. Found: m/z 355.0671.

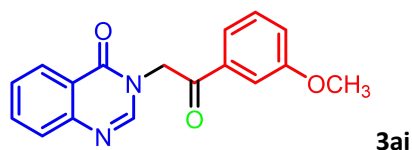

#### 3-(2-(3-methoxyphenyl)-2-oxoethyl)quinazolin-4(3H)-one (**3ai**)

According to the general procedure, **3ai** was obtained using quinazolin-4(3H)-one **1a** (29.2

mg, 0.2 mmol) and 1-methoxy-3-vinylbenzene **2i** (56.7 mg, 55.5  $\mu$ L, 0.4 mmol) in 60% yield (35.3 mg) as a white solid (silica gel flash chromatography: petroleum ether/EtOAc = 3:1).

**<sup>1</sup>H NMR** (400 MHz, CDCl<sub>3</sub>)  $\delta$ : 8.30-8.28 (m, 1H), 7.97 (s, 1H), 7.80-7.73 (m, 2H), 7.64-7.61 (m, 1H), 7.53-7.49 (m, 2H), 7.43 (t, *J* = 8.0 Hz, 1H), 7.20-7.17 (m, 1H), 5.42 (s, 2H), 3.85 (s, 3H);

**<sup>13</sup>C NMR** (100 MHz, CDCl<sub>3</sub>)  $\delta$ : 191.6, 161.2, 160.2, 148.3, 146.7, 135.8, 134.6, 130.2, 127.8, 127.5, 127.0, 122.0, 121.0, 120.8, 112.5, 55.6, 51.6.

**HRMS (ESI)** calcd for C<sub>17</sub>H<sub>14</sub>N<sub>2</sub>NaO<sub>3</sub>: [M+Na]<sup>+</sup> 317.0897. Found: m/z 317.0903.

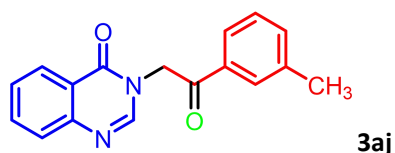

### 3-(2-oxo-2-(m-tolyl)ethyl)quinazolin-4(3H)-one (**3aj**)

According to the general procedure, **3aj** was obtained using quinazolin-4(3H)-one **1a** (29.2 mg, 0.2 mmol) and 1-fluoro-4-vinylbenzene **2j** (47.3 mg, 53.5  $\mu$ L, 0.4 mmol) in 65% yield (36.2 mg) as a white solid (silica gel flash chromatography: petroleum ether/EtOAc = 3:1).

**<sup>1</sup>H NMR** (400 MHz, CDCl<sub>3</sub>)  $\delta$ : 8.30-8.28 (m, 1H), 7.97 (s, 1H), 7.84-7.82 (m, 2H), 7.80-7.75 (m, 2H), 7.53-7.49 (m, 1H), 7.47-7.44 (m, 1H), 7.42-7.39 (m, 1H), 5.42 (s, 2H);

**<sup>13</sup>C NMR** (100 MHz, CDCl<sub>3</sub>)  $\delta$ : 191.9, 161.2, 148.4, 146.8, 139.1, 135.2, 134.6, 134.6, 129.0, 128.8, 127.8, 127.5, 127.0, 125.5, 122.1, 51.4, 21.5.

**HRMS (ESI)** calcd for C<sub>17</sub>H<sub>14</sub>N<sub>2</sub>NaO<sub>3</sub>: [M+Na]<sup>+</sup> 301.0947. Found: m/z 301.0950.

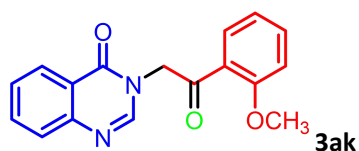

### 3-(2-(2-methoxyphenyl)-2-oxoethyl)quinazolin-4(3H)-one (**3ak**)

According to the general procedure, **3ak** was obtained using quinazolin-4(3H)-one **1a** (29.2 mg, 0.2 mmol) and 1-methoxy-2-vinylbenzene **2k** (53.7 mg, 54.0  $\mu$ L, 0.4 mmol) in 55% yield (32.4 mg) as a white solid (silica gel flash chromatography: petroleum ether/EtOAc = 1:1).

**<sup>1</sup>H NMR** (400 MHz, CDCl<sub>3</sub>) δ: 8.30-8.27 (m, 1H), 7.97 (s, 1H), 7.93-7.91 (m, 1H), 7.78-7.72 (m, 2H), 7.57-7.52 (m, 1H), 7.50-7.46 (m, 1H), 7.06-7.01 (m, 2H), 5.36 (s, 2H), 3.99 (s, 3H);

**<sup>13</sup>C NMR** (100 MHz, CDCl<sub>3</sub>) δ: 192.5, 161.2, 159.7, 148.4, 147.2, 135.4, 134.4, 131.4, 127.6, 127.3, 126.9, 124.7, 122.2, 121.3, 111.7, 56.3, 55.8.

**HRMS (ESI)** calcd for C<sub>17</sub>H<sub>14</sub>N<sub>2</sub>NaO<sub>3</sub>: [M+Na]<sup>+</sup> 317.0897. Found: m/z 317.0903.

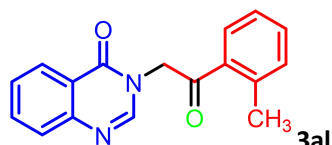

### 3-(2-oxo-2-(o-tolyl)ethyl)quinazolin-4(3H)-one (**3al**)

According to the general procedure, **3al** was obtained using quinazolin-4(3H)-one **1a** (29.2 mg, 0.2 mmol) and 1-methyl-2-vinylbenzene **2l** (47.3 mg, 52.0 μL, 0.4 mmol) in 52% yield (28.9 mg) as a white solid (silica gel flash chromatography: petroleum ether/EtOAc = 3:1).

**<sup>1</sup>H NMR** (400 MHz, CDCl<sub>3</sub>) δ: 8.31-8.28 (m, 1H), 7.98 (s, 1H), 7.90-7.88 (m, 1H), 7.80-7.73 (m, 2H), 7.53-7.45 (m, 2H), 7.37-7.30 (m, 2H), 5.30 (s, 2H), 2.53 (s, 3H);

**<sup>13</sup>C NMR** (100 MHz, CDCl<sub>3</sub>) δ: 194.6, 161.2, 148.4, 146.8, 139.9, 134.6, 134.4, 132.9, 132.6, 128.9, 127.7, 127.5, 126.9, 126.2, 122.1, 77.5, 77.2, 76.8, 53.3, 21.6.

**HRMS (ESI)** calcd for C<sub>17</sub>H<sub>14</sub>N<sub>2</sub>NaO<sub>3</sub>: [M+Na]<sup>+</sup> 301.0947. Found: m/z 301.0950.

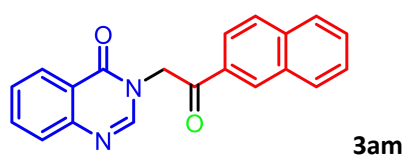

### 3-(2-(naphthalen-2-yl)-2-oxoethyl)quinazolin-4(3H)-one (**3am**)

According to the general procedure, **3am** was obtained using quinazolin-4(3H)-one **1a** (29.2 mg, 0.2 mmol) and 2-vinylnaphthalene **2m** (61.7 mg, 0.4 mmol) in 41% yield (25.8 mg) as a white solid (silica gel flash chromatography: petroleum ether/EtOAc = 3:1).

**<sup>1</sup>H NMR** (400 MHz, CDCl<sub>3</sub>) δ: 8.59-8.58 (m, 1H), 8.31-8.28 (m, 1H), 8.05-8.02 (m, 2H), 7.99 (d, *J* = 8.4 Hz, 1H), 7.93 (d, *J* = 8.8 Hz, 1H), 7.89 (d, *J* = 8.4 Hz, 1H), 7.80-7.74 (m, 2H), 7.66-7.62 (m, 1H), 7.61-7.56 (m, 1H), 7.52-7.48 (m, 1H), 5.56 (s, 2H);

$^{13}\text{C}$  NMR (100 MHz,  $\text{CDCl}_3$ )  $\delta$ : 191.7, 161.2, 148.4, 146.8, 136.2, 134.6, 132.5, 131.9, 130.3, 129.8, 129.3, 129.1, 128.0, 127.8, 127.5, 127.3, 127.0, 123.6, 122.1, 51.5.

HRMS (ESI) calcd for  $\text{C}_{20}\text{H}_{14}\text{N}_2\text{NaO}_2$ :  $[\text{M}+\text{Na}]^+$  337.0947. Found:  $m/z$  337.0939.

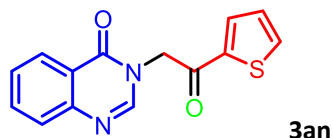

### 3-(2-oxo-2-(thiophen-2-yl)ethyl)quinazolin-4(3H)-one (3an)

According to the general procedure, **3an** was obtained using quinazolin-4(3H)-one **1a** (29.2 mg, 0.2 mmol) and 2-vinylthiophene **2n** (44.1 mg, 42.0  $\mu\text{L}$ , 0.4 mmol) in 53% yield (28.6 mg) as a white solid (silica gel flash chromatography: petroleum ether/EtOAc = 3:1).

$^1\text{H}$  NMR (400 MHz,  $\text{CDCl}_3$ )  $\delta$ : 8.29-8.27 (m, 1H), 8.02 (s, 1H), 7.94-7.92 (m, 1H), 7.80-7.73 (m, 3H), 7.53-7.49 (m, 1H), 7.22-7.19 (m, 1H), 5.34 (s, 2H);

$^{13}\text{C}$  NMR (100 MHz,  $\text{CDCl}_3$ )  $\delta$ : 184.7, 161.1, 148.3, 146.6, 140.8, 135.4, 134.7, 133.0, 128.7, 127.8, 127.6, 127.0, 122.0, 51.4.

HRMS (ESI) calcd for  $\text{C}_{14}\text{H}_{11}\text{N}_2\text{O}_2\text{S}$ :  $[\text{M}+\text{H}]^+$  271.0536. Found:  $m/z$  271.0537.

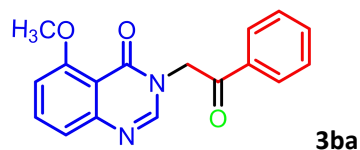

### 5-methoxy-3-(2-oxo-2-phenylethyl)quinazolin-4(3H)-one (3ba)

According to the general procedure, **3ba** was obtained using 5-methoxyquinazolin-4(3H)-one **1b** (35.2 mg, 0.2 mmol) and styrene **2a** (41.7 mg, 46.0  $\mu\text{L}$ , 0.4 mmol) in 34% yield (20.0 mg) as a white solid (silica gel flash chromatography: petroleum ether/EtOAc = 1:1).

$^1\text{H}$  NMR (400 MHz,  $\text{CDCl}_3$ )  $\delta$ : 8.05-8.02 (m, 2H), 7.99 (s, 1H), 7.69-7.61 (m, 2H), 7.53-7.49 (m, 2H), 7.34-7.31 (m, 1H), 6.92 (d,  $J = 8.8$  Hz, 1H), 5.33 (s, 2H), 3.96 (s, 3H);

$^{13}\text{C}$  NMR (100 MHz,  $\text{CDCl}_3$ )  $\delta$ : 192.1, 160.4, 159.3, 150.8, 147.5, 135.1, 134.7, 134.3, 129.1, 128.4, 119.8, 111.9, 108.7, 56.4, 51.3.

HRMS (ESI) calcd for  $\text{C}_{17}\text{H}_{14}\text{N}_2\text{NaO}_3$ :  $[\text{M}+\text{Na}]^+$  317.0897. Found:  $m/z$  317.0903.

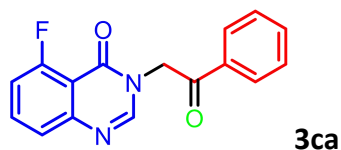

### 5-fluoro-3-(2-oxo-2-phenylethyl)quinazolin-4(3H)-one (3ca)



According to the general procedure, **3ca** was obtained using 5-fluoroquinazolin-4(3H)-one **1c** (32.8 mg, 0.2 mmol) and styrene **2a** (41.7 mg, 46.0  $\mu$ L, 0.4 mmol) in 57% yield (32.2 mg) as a white solid (silica gel flash chromatography: petroleum ether/EtOAc = 1:1).

$^1\text{H NMR}$  (400 MHz, DMSO- $d_6$ )  $\delta$ : 8.41 (s, 1H), 8.11-8.08 (m, 2H), 7.88-7.83 (m, 1H), 7.77-7.72 (m, 1H), 7.64-7.60 (m, 2H), 7.56 (d,  $J$  = 8.0 Hz, 1H), 7.36-7.31 (m, 1H), 5.63 (s, 2H);

$^{13}\text{C NMR}$  (100 MHz, DMSO- $d_6$ )  $\delta$ : 192.8, 160.4 (d,  $J$  = 261.7 Hz), 157.2 (d,  $J$  = 4.0 Hz), 150.3, 149.3, 135.5 (d,  $J$  = 10.0 Hz), 134.3, 129.1, 128.2, 123.5 (d,  $J$  = 4.0 Hz), 113.8, 113.6, 111.0 (d,  $J$  = 6.0 Hz), 52.1.

$^{19}\text{F NMR}$  (376 MHz, DMSO- $d_6$ )  $\delta$ : -110.62.

**HRMS (ESI)** calcd for  $\text{C}_{16}\text{H}_{12}\text{FN}_2\text{O}_2$ :  $[\text{M}+\text{H}]^+$  283.0877. Found:  $m/z$  283.0868.

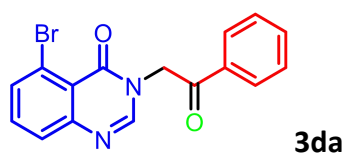

#### 5-bromo-3-(2-oxo-2-phenylethyl)quinazolin-4(3H)-one (**3da**)

According to the general procedure, **3da** was obtained using 5-bromoquinazolin-4(3H)-one **1d** (45.0 mg, 0.2 mmol) and styrene **2a** (41.7 mg, 46.0  $\mu$ L, 0.4 mmol) in 67% yield (45.8 mg) as a white solid (silica gel flash chromatography: petroleum ether/EtOAc = 8:1).

$^1\text{H NMR}$  (400 MHz,  $\text{CDCl}_3$ )  $\delta$ : 8.02-7.98 (m, 3H), 7.72 (dd,  $J$  = 7.6, 1.2 Hz, 1H), 7.67 (dd,  $J$  = 8.4, 1.2 Hz, 1H), 7.65-7.60 (m, 1H), 7.53-7.47 (m, 3H), 5.37 (s, 2H);

$^{13}\text{C NMR}$  (100 MHz,  $\text{CDCl}_3$ )  $\delta$ : 191.6, 159.2, 150.6, 147.3, 134.5, 134.4, 134.3, 134.1, 129.1, 128.3, 127.8, 121.5, 120.2, 51.7.

**HRMS (ESI)** calcd for  $\text{C}_{16}\text{H}_{11}\text{BrN}_2\text{NaO}_2$ :  $[\text{M}+\text{Na}]^+$  364.9896. Found:  $m/z$  364.9896.

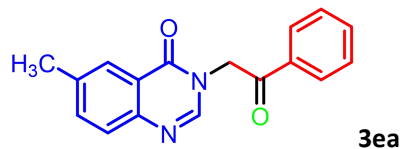

#### 6-methyl-3-(2-oxo-2-phenylethyl)quinazolin-4(3H)-one (**3ea**)

According to the general procedure, **3ea** was obtained using 6-methylquinazolin-4(3H)-one **1e** (32.0 mg, 0.2 mmol) and styrene **2a** (41.7 mg, 46.0  $\mu$ L, 0.4 mmol) in 52% yield (28.9 mg) as a white solid (silica gel flash chromatography: petroleum ether/EtOAc = 2:1).

**<sup>1</sup>H NMR** (400 MHz, CDCl<sub>3</sub>) δ: 8.09 (s, 1H), 8.06-8.04 (m, 2H), 7.94 (s, 1H), 7.68-7.64 (m, 2H), 7.61-7.59 (m, 1H), 7.56-7.51 (m, 2H), 5.44 (s, 2H), 2.49 (s, 3H);

**<sup>13</sup>C NMR** (100 MHz, CDCl<sub>3</sub>) δ: 191.8, 161.2, 146.3, 146.0, 137.9, 136.1, 134.6, 134.5, 129.2, 128.3, 127.5, 126.4, 121.8, 51.5, 21.5.

**HRMS (ESI)** calcd for C<sub>17</sub>H<sub>14</sub>N<sub>2</sub>NaO<sub>3</sub>: [M+Na]<sup>+</sup> 301.0947. Found: m/z 301.0950.

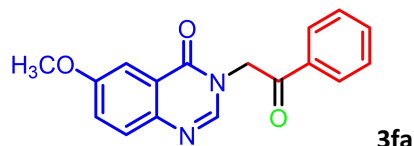

### 6-methoxy-3-(2-oxo-2-phenylethyl)quinazolin-4(3H)-one (**3fa**)

According to the general procedure, **3fa** was obtained using 6-methoxyquinazolin-4(3H)-one **1f** (35.2 mg, 0.2 mmol) and styrene **2a** (41.7 mg, 46.0 μL, 0.4 mmol) in 52% yield (30.6 mg) as a white solid (silica gel flash chromatography: petroleum ether/EtOAc = 1:1).

**<sup>1</sup>H NMR** (400 MHz, CDCl<sub>3</sub>) δ: 8.05-8.03 (m, 2H), 7.88 (s, 1H), 7.68-7.63 (m, 3H), 7.54-7.51 (m, 2H), 7.38-7.35 (m, 1H), 5.43 (s, 2H), 3.90 (s, 3H);

**<sup>13</sup>C NMR** (100 MHz, CDCl<sub>3</sub>) δ: 191.7, 161.0, 158.9, 144.6, 142.9, 134.6, 134.4, 129.3, 129.1, 128.3, 124.8, 122.9, 106.3, 56.0, 51.6.

**HRMS (ESI)** calcd for C<sub>17</sub>H<sub>14</sub>N<sub>2</sub>NaO<sub>3</sub>: [M+Na]<sup>+</sup> 317.0897. Found: m/z 317.0903.

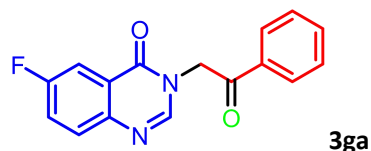

### 6-fluoro-3-(2-oxo-2-phenylethyl)quinazolin-4(3H)-one (**3ga**)

According to the general procedure, **3ga** was obtained using 6-fluoroquinazolin-4(3H)-one **1g** (32.8 mg, 0.2 mmol) and styrene **2a** (41.7 mg, 46.0 μL, 0.4 mmol) in 68% yield (38.4 mg) as a white solid (silica gel flash chromatography: petroleum ether/EtOAc = 1:1).

**<sup>1</sup>H NMR** (400 MHz, CDCl<sub>3</sub>) δ: 8.05-8.02 (m, 2H), 7.94 (s, 1H), 7.91 (dd, *J* = 8.4, 3.2 Hz, 1H), 7.78-7.75 (m, 1H), 7.68-7.64 (m, 1H), 7.55-7.47 (m, 3H), 5.44 (s, 2H);

**<sup>13</sup>C NMR** (100 MHz, CDCl<sub>3</sub>) δ: 191.5, 161.3 (d, *J* = 248.0 Hz), 160.5 (d, *J* = 3.0 Hz), 146.0 (d, *J* = 3.0 Hz), 145.0 (d, *J* = 3.0 Hz), 134.6, 134.4, 130.2 (d, *J* = 9.0 Hz), 129.2, 128.3, 123.3, 123.1, 168.0 (d, *J* = 23.0 Hz), 51.5.

**<sup>19</sup>F NMR** (376 MHz, CDCl<sub>3</sub>) δ: -111.63.

**HRMS (ESI)** calcd for C<sub>16</sub>H<sub>12</sub>FN<sub>2</sub>O<sub>2</sub>: [M+H]<sup>+</sup> 283.0877. Found: m/z 283.0868.

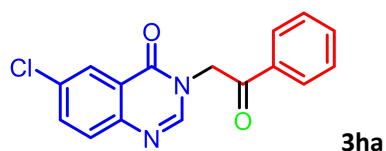

### 6-chloro-3-(2-oxo-2-phenylethyl)quinazolin-4(3H)-one (**3ha**)

According to the general procedure, **3ha** was obtained using 6-chloroquinazolin-4(3H)-one **1h** (36.1 mg, 0.2 mmol) and styrene **2a** (41.7 mg, 46.0  $\mu$ L, 0.4 mmol) in 69% yield (41.1 mg) as a white solid (silica gel flash chromatography: petroleum ether/EtOAc = 1:1).

<sup>1</sup>H NMR (400 MHz, CDCl<sub>3</sub>)  $\delta$ : 8.19 (d,  $J$  = 8.8 Hz, 1H), 8.02-8.00 (m, 2H), 7.99 (s, 1H), 7.74 (d,  $J$  = 2.0 Hz, 1H), 7.66-7.62 (m, 1H), 7.53-7.49 (m, 2H), 7.44 (dd,  $J$  = 8.4, 2.0 Hz, 1H), 5.42 (s, 2H);

<sup>13</sup>C NMR (100 MHz, CDCl<sub>3</sub>)  $\delta$ : 191.5, 160.5, 149.2, 148.0, 140.9, 134.6, 134.3, 129.2, 128.4, 128.3, 128.1, 127.3, 120.5, 51.5.

HRMS (ESI) calcd for C<sub>16</sub>H<sub>11</sub>ClN<sub>2</sub>NaO<sub>2</sub>: [M+Na]<sup>+</sup> 321.0401. Found: m/z 321.0391.

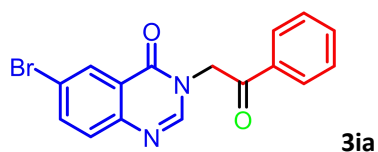

### 6-bromo-3-(2-oxo-2-phenylethyl)quinazolin-4(3H)-one (**3ia**)

According to the general procedure, **3ia** was obtained using 6-bromoquinazolin-4(3H)-one **1i** (45.0 mg, 0.2 mmol) and styrene **2a** (41.7 mg, 46.0  $\mu$ L, 0.4 mmol) in 63% yield (43.1 mg) as a white solid (silica gel flash chromatography: petroleum ether/EtOAc = 8:1).

<sup>1</sup>H NMR (400 MHz, CDCl<sub>3</sub>)  $\delta$ : 8.42 (d,  $J$  = 2.0 Hz, 1H), 8.05-8.03 (m, 2H), 8.00 (s, 1H), 7.87-7.85 (m, 1H), 7.69-7.62 (m, 2H), 7.56-7.52 (m, 2H), 5.45 (s, 2H);

<sup>13</sup>C NMR (100 MHz, CDCl<sub>3</sub>)  $\delta$ : 191.4, 160.0, 147.2, 147.1, 137.8, 134.6, 134.4, 129.6, 129.5, 129.2, 128.3, 123.4, 121.2, 51.5.

HRMS (ESI) calcd for C<sub>16</sub>H<sub>11</sub>BrN<sub>2</sub>NaO<sub>2</sub>: [M+Na]<sup>+</sup> 364.9896. Found: m/z 364.9896.

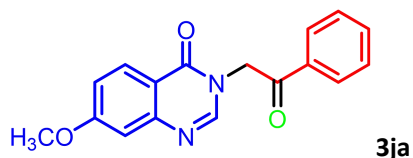

### 7-methoxy-3-(2-oxo-2-phenylethyl)quinazolin-4(3H)-one (**3ja**)

According to the general procedure, **3ja** was obtained using 7-methoxyquinazolin-4(3H)-one **1j** (35.2 mg, 0.2 mmol) and styrene **2a** (41.7 mg, 46.0  $\mu$ L, 0.4 mmol) in 45% yield (26.1 mg).

5 mg) as a white solid (silica gel flash chromatography: petroleum ether/EtOAc = 1:1).

<sup>1</sup>H NMR (400 MHz, CDCl<sub>3</sub>) δ: 8.18 (d, *J* = 8.8 Hz, 1H), 8.04-8.02 (m, 2H), 7.95 (s, 1H), 7.67-7.62 (m, 1H), 7.54-7.50 (m, 2H), 7.12 (d, *J* = 2.4 Hz, 1H), 7.08-7.05 (m, 1H), 5.41 (s, 2H), 3.92 (s, 3H);

<sup>13</sup>C NMR (100 MHz, CDCl<sub>3</sub>) δ: 192.0, 164.8, 160.7, 150.7, 147.4, 134.5, 134.4, 129.1, 128.5, 128.3, 117.4, 115.5, 108.6, 55.8, 51.2.

HRMS (ESI) calcd for C<sub>17</sub>H<sub>14</sub>N<sub>2</sub>NaO<sub>3</sub>: [M+Na]<sup>+</sup> 317.0897. Found: *m/z* 317.0903.

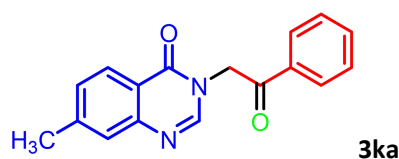

#### 7-methyl-3-(2-oxo-2-phenylethyl)quinazolin-4(3H)-one (3ka)

According to the general procedure, **3ka** was obtained using 7-methylquinazolin-4(3H)-one **1k** (32.0 mg, 0.2 mmol) and styrene **2a** (41.7 mg, 46.0 μL, 0.4 mmol) in 50% yield (27.8 mg) as a white solid (silica gel flash chromatography: petroleum ether/EtOAc = 2:1).

<sup>1</sup>H NMR (400 MHz, CDCl<sub>3</sub>) δ: 8.17 (d, *J* = 8.0 Hz, 1H), 8.06-8.03 (m, 2H), 7.95 (s, 1H), 7.68-7.63 (m, 1H), 7.55-7.51 (m, 3H), 7.34-7.32 (m, 1H), 5.42 (s, 2H), 2.52 (s, 3H);

<sup>13</sup>C NMR (100 MHz, CDCl<sub>3</sub>) δ: 191.9, 161.1, 148.5, 146.8, 145.7, 134.6, 134.4, 129.2, 129.1, 128.3, 127.5, 126.8, 119.6, 51.4, 22.1.

HRMS (ESI) calcd for C<sub>17</sub>H<sub>14</sub>N<sub>2</sub>NaO<sub>3</sub>: [M+Na]<sup>+</sup> 301.0947. Found: *m/z* 301.0950.

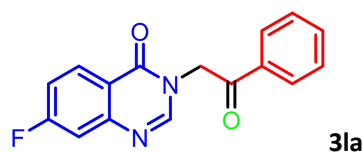

#### 7-fluoro-3-(2-oxo-2-phenylethyl)quinazolin-4(3H)-one (3la)

According to the general procedure, **3la** was obtained using 7-fluoroquinazolin-4(3H)-one **1l** (32.8 mg, 0.2 mmol) and styrene **2a** (41.7 mg, 46.0 μL, 0.4 mmol) in 65% yield (36.7 mg) as a white solid (silica gel flash chromatography: petroleum ether/EtOAc = 1:1).

<sup>1</sup>H NMR (400 MHz, CDCl<sub>3</sub>) δ: 8.32-8.28 (m, 1H), 8.05-8.02 (m, 2H), 7.98 (s, 1H), 7.68-7.64 (m, 1H), 7.55-7.51 (m, 2H), 7.41-7.38 (m, 1H), 7.24-7.20 (m, 1H), 5.43 (s, 2H);

<sup>13</sup>C NMR (100 MHz, CDCl<sub>3</sub>) δ: 191.6, 166.7 (d, *J* = 253.0 Hz), 160.4, 150.6 (d, *J* = 13.0 Hz), 148.0, 134.6, 134.4, 129.7 (d, *J* = 11.0 Hz), 129.2, 128.3, 118.8 (d, *J* = 3.0 Hz), 116.3 (d, *J* = 23.0

Hz), 113.2 (d,  $J = 21.0$  Hz), 51.4.

$^{19}\text{F}$  NMR (376 MHz,  $\text{CDCl}_3$ )  $\delta$ : -102.83.

HRMS (ESI) calcd for  $\text{C}_{16}\text{H}_{12}\text{FN}_2\text{O}_2$ :  $[\text{M}+\text{H}]^+$  283.0877. Found:  $m/z$  283.0868.

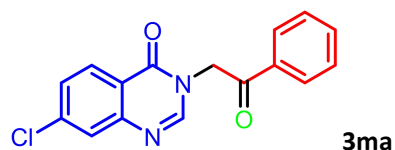

#### 7-chloro-3-(2-oxo-2-phenylethyl)quinazolin-4(3H)-one (3ma)

According to the general procedure, **3ma** was obtained using 6-chloroquinazolin-4(3H)-one **1m** (36.1 mg, 0.2 mmol) and styrene **2a** (41.7 mg, 46.0  $\mu\text{L}$ , 0.4 mmol) in 62% yield (37.0 mg) as a white solid (silica gel flash chromatography: petroleum ether/EtOAc = 3:1).

$^1\text{H}$  NMR (400 MHz,  $\text{CDCl}_3$ )  $\delta$ : 8.24 (d,  $J = 2.0$  Hz, 1H), 8.04-8.02 (m, 2H), 7.96 (s, 1H), 7.72-7.70 (m, 2H), 7.67-7.64 (m, 1H), 7.55-7.51 (m, 2H), 5.44 (s, 2H);

$^{13}\text{C}$  NMR (100 MHz,  $\text{CDCl}_3$ )  $\delta$ : 191.4, 160.1, 147.0, 146.8, 135.0, 134.6, 134.4, 133.4, 129.4, 129.2, 128.3, 126.3, 123.1, 51.5.

HRMS (ESI) calcd for  $\text{C}_{16}\text{H}_{11}\text{ClN}_2\text{NaO}_2$ :  $[\text{M}+\text{Na}]^+$  321.0401. Found:  $m/z$  321.0391.

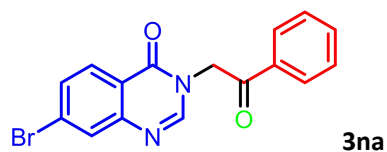

#### 7-bromo-3-(2-oxo-2-phenylethyl)quinazolin-4(3H)-one (3na)

According to the general procedure, **3na** was obtained using 7-bromoquinazolin-4(3H)-one **1n** (45.0 mg, 0.2 mmol) and styrene **2a** (41.7 mg, 46.0  $\mu\text{L}$ , 0.4 mmol) in 63% yield (43.1 mg) as a white solid (silica gel flash chromatography: petroleum ether/EtOAc = 8:1).

$^1\text{H}$  NMR (400 MHz,  $\text{CDCl}_3$ )  $\delta$ : 8.13 (d,  $J = 8.8$  Hz, 1H), 8.04-8.02 (m, 2H), 7.97 (s, 1H), 7.93 (d,  $J = 1.6$  Hz, 1H), 7.68-7.64 (m, 1H), 7.61 (dd,  $J = 8.4, 2.0$  Hz, 1H), 7.55-7.52 (m, 2H), 5.42 (s, 2H);

$^{13}\text{C}$  NMR (100 MHz,  $\text{CDCl}_3$ )  $\delta$ : 191.5, 160.7, 149.3, 147.9, 134.6, 134.4, 130.9, 130.6, 129.4, 129.2, 128.4, 128.3, 120.9, 51.5.

HRMS (ESI) calcd for  $\text{C}_{16}\text{H}_{11}\text{BrN}_2\text{NaO}_2$ :  $[\text{M}+\text{Na}]^+$  364.9896. Found:  $m/z$  364.9896.

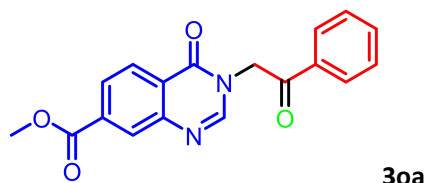

**Methyl 4-oxo-3-(2-oxo-2-phenylethyl)-3,4-dihydroquinazoline-7-carboxylate (30a)**

According to the general procedure, **30a** was obtained using methyl 4-oxo-3,4-dihydroquinazoline-7-carboxylate **1o** (40.8 mg, 0.2 mmol) and styrene **2a** (41.7 mg, 46.0  $\mu$ L, 0.4 mmol) in 47% yield (30.3 mg) as a white solid (silica gel flash chromatography: petroleum ether/EtOAc = 4:1).

$^1\text{H NMR}$  (400 MHz,  $\text{CDCl}_3$ )  $\delta$ : 8.41 (d,  $J$  = 1.6 Hz, 1H), 8.33 (d,  $J$  = 8.0 Hz, 1H), 8.11-8.09 (m, 1H), 8.05-8.04 (m, 1H), 8.03-8.01 (m, 2H), 7.68-7.63 (m, 2H), 7.55-7.51 (m, 2H), 5.45 (s, 2H), 3.98 (s, 3H);

$^{13}\text{C NMR}$  (100 MHz,  $\text{CDCl}_3$ )  $\delta$ : 191.5, 166.1, 160.6, 148.2, 147.5, 135.7, 134.6, 134.4, 129.6, 129.2, 128.3, 127.5, 127.3, 125.0, 52.8, 51.5.

**HRMS (ESI)** calcd for  $\text{C}_{18}\text{H}_{15}\text{N}_2\text{O}_4$ :  $[\text{M}+\text{H}]^+$  323.1026. Found:  $m/z$  323.1036.

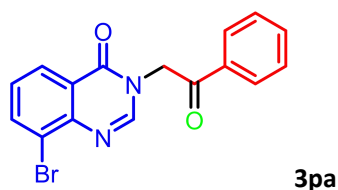

**8-bromo-3-(2-oxo-2-phenylethyl)quinazolin-4(3H)-one (3pa)**

According to the general procedure, **3pa** was obtained using 8-bromoquinazolin-4(3H)-one **1p** (45.0 mg, 0.2 mmol) and styrene **2a** (41.7 mg, 46.0  $\mu$ L, 0.4 mmol) in 64% yield (43.8 mg) as a white solid (silica gel flash chromatography: petroleum ether/EtOAc = 8:1).

$^1\text{H NMR}$  (400 MHz,  $\text{CDCl}_3$ )  $\delta$ : 8.26-8.24 (m, 1H), 8.08 (s, 1H), 8.06-8.02 (m, 3H), 7.68-7.64 (m, 1H), 7.55-7.51 (s, 2H), 7.36 (t,  $J$  = 8.0 Hz, 1H), 5.44 (s, 2H);

$^{13}\text{C NMR}$  (100 MHz,  $\text{CDCl}_3$ )  $\delta$ : 191.2, 160.6, 147.5, 146.2, 138.3, 134.6, 134.4, 129.2, 128.3, 128.1, 126.6, 123.6, 122.6, 77.5, 77.2, 76.8, 51.7.

**HRMS (ESI)** calcd for  $\text{C}_{16}\text{H}_{11}\text{BrN}_2\text{NaO}_2$ :  $[\text{M}+\text{Na}]^+$  364.9896. Found:  $m/z$  364.9896.

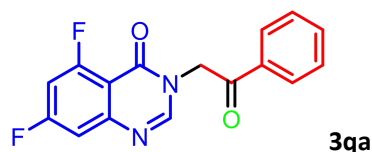

### 5,7-difluoro-3-(2-oxo-2-phenylethyl)quinazolin-4(3H)-one (3qa)

According to the general procedure, **3qa** was obtained using 5,7-difluoroquinazolin-4(3H)-one **1q** (36.4 mg, 0.2 mmol) and styrene **2a** (41.7 mg, 46.0  $\mu$ L, 0.4 mmol) in 55% yield (33.0 mg) as a white solid (silica gel flash chromatography: petroleum ether/EtOAc = 2:1).

**<sup>1</sup>H NMR** (400 MHz, DMSO-*d*<sub>6</sub>)  $\delta$ : 8.46 (s, 1H), 8.10-8.08 (m, 2H), 7.77-7.72 (m, 1H), 7.64-7.60 (m, 2H), 7.47-7.38 (m, 2H), 5.64 (s, 2H);

**<sup>13</sup>C NMR** (100 MHz, DMSO-*d*<sub>6</sub>)  $\delta$ : 192.6, 165.1 (dd, *J* = 250.0, 15.0 Hz), 161.6 (dd, *J* = 264.0, 15.0 Hz), 156.6 (d, *J* = 4.0 Hz), 151.6 (d, *J* = 14.0 Hz), 150.4, 134.3, 134.2, 129.1, 128.1, 109.2 (dd, *J* = 22.0, 5.0 Hz), 108.4, 103.7 (q, *J* = 26.0 Hz), 52.0.

**<sup>19</sup>F NMR** (376 MHz, DMSO-*d*<sub>6</sub>)  $\delta$ : -100.71 (d, *J* = 12.8 Hz), -105.48 (d, *J* = 12.4 Hz).

**HRMS (ESI)** calcd for C<sub>16</sub>H<sub>11</sub>F<sub>2</sub>N<sub>2</sub>O<sub>2</sub>: [M+H]<sup>+</sup> 301.0783. Found: *m/z* 301.0778.

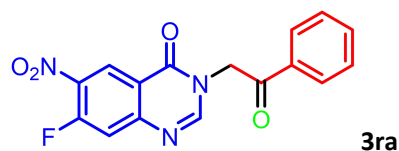

### 7-fluoro-6-nitro-3-(2-oxo-2-phenylethyl)quinazolin-4(3H)-one (3ra)

According to the general procedure, **3ra** was obtained using 7-fluoro-6-nitroquinazolin-4(3H)-one **1r** (41.8 mg, 0.2 mmol) and styrene **2a** (41.7 mg, 46.0  $\mu$ L, 0.4 mmol) in 41% yield (26.8 mg) as a white solid (silica gel flash chromatography: petroleum ether/EtOAc = 1:2).

**<sup>1</sup>H NMR** (400 MHz, DMSO-*d*<sub>6</sub>)  $\delta$ : 8.80 (d, *J* = 8.0 Hz, 1H), 8.62 (s, 1H), 8.11 (d, *J* = 7.6 Hz, 2H), 7.92 (d, *J* = 12.0 Hz, 1H), 7.62 (t, *J* = 7.6 Hz, 1H), 7.63 (t, *J* = 7.6 Hz, 2H), 5.73 (s, 2H);

**<sup>13</sup>C NMR** (100 MHz, DMSO-*d*<sub>6</sub>)  $\delta$ : 192.3, 158.8, 157.8 (d, *J* = 264.6 Hz), 153.2 (d, *J* = 13.5 Hz), 152.6, 136.0, 134.4, 134.1, 129.1, 128.2, 126.0, 118.0, 116.0 (d, *J* = 21.5 Hz), 52.6.

**<sup>19</sup>F NMR** (376 MHz, DMSO-*d*<sub>6</sub>)  $\delta$ : -111.18.

**HRMS (ESI)** calcd for C<sub>16</sub>H<sub>11</sub>FN<sub>3</sub>O<sub>4</sub>: [M+H]<sup>+</sup> 328.0728. Found: *m/z* 328.0726.

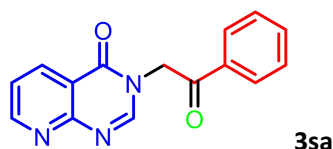

### 3-(2-oxo-2-phenylethyl)pyrido[2,3-d]pyrimidin-4(3H)-one (**3sa**)

According to the general procedure, **3sa** was obtained using pyrido[2,3-d]pyrimidin-4(3H)-one **1s** (29.4 mg, 0.2 mmol) and styrene **2a** (41.7 mg, 46.0  $\mu$ L, 0.4 mmol) in 45% yield (23.9 mg) as a white solid (silica gel flash chromatography: petroleum ether/EtOAc = 1:8).

$^1\text{H NMR}$  (400 MHz, DMSO- $d_6$ )  $\delta$ : 9.02 (dd,  $J = 4.4, 2.0$  Hz, 1H), 8.58 (s, 1H), 8.56 (dd,  $J = 7.6, 2.0$  Hz, 1H), 8.12-8.09 (m, 2H), 7.78-7.73 (m, 2H), 7.65-7.60 (m, 3H), 5.68 (s, 2H);

$^{13}\text{C NMR}$  (100 MHz, DMSO- $d_6$ )  $\delta$ : 192.6, 160.7, 158.0, 156.2, 151.5, 136.0, 134.4, 134.2, 129.1, 128.2, 123.1, 116.7, 52.3.

**HRMS (ESI)** calcd for  $\text{C}_{15}\text{H}_{11}\text{N}_3\text{NaO}_2$ :  $[\text{M}+\text{Na}]^+$  288.0743. Found:  $m/z$  288.0748.

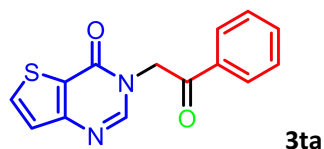

### 3-(2-oxo-2-phenylethyl)thieno[3,2-d]pyrimidin-4(3H)-one (**3ta**)

According to the general procedure, **3ta** was obtained using thieno[3,2-d]pyrimidin-4(3H)-one **1t** (30.4 mg, 0.2 mmol) and styrene **2a** (41.7 mg, 46.0  $\mu$ L, 0.4 mmol) in 69% yield (37.3 mg) as a white solid (silica gel flash chromatography: petroleum ether/EtOAc = 1:1).

$^1\text{H NMR}$  (400 MHz,  $\text{CDCl}_3$ )  $\delta$ : 8.04-8.02 (m, 2H), 8.00 (s, 1H), 7.80 (d,  $J = 5.2$  Hz, 1H), 7.67-7.62 (m, 1H), 7.54-7.50 (m, 2H), 7.36 (d,  $J = 5.2$  Hz, 1H), 5.47 (s, 2H);

$^{13}\text{C NMR}$  (100 MHz,  $\text{CDCl}_3$ )  $\delta$ : 191.6, 157.4, 157.3, 148.2, 134.7, 134.5, 134.4, 129.2, 128.3, 125.4, 123.4, 51.0.

**HRMS (ESI)** calcd for  $\text{C}_{14}\text{H}_{10}\text{N}_2\text{NaO}_2\text{S}$ :  $[\text{M}+\text{Na}]^+$  293.0355. Found:  $m/z$  293.0363.

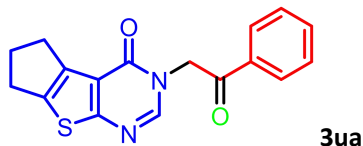

### 3-(2-oxo-2-phenylethyl)-3,5,6,7-tetrahydro-4H-cyclopenta[4,5]thieno[2,3-d]pyrimidin-4-one (**3ua**)

According to the general procedure, **3ua** was obtained using 3,5,6,7-tetrahydro-4H-cyclopenta[4,5]thieno[2,3-d]pyrimidin-4-one **1u** (38.4 mg, 0.2 mmol) and styrene **2a** (41.7 mg, 46.0



$\mu\text{L}$ , 0.4 mmol) in 68% yield (42.2 mg) as a white solid (silica gel flash chromatography: petroleum ether/EtOAc = 1:1).

$^1\text{H NMR}$  (400 MHz,  $\text{CDCl}_3$ )  $\delta$ : 8.02-8.00 (m, 2H), 7.85 (s, 1H), 7.64-7.60 (m, 1H), 7.51-7.47 (m, 2H), 5.39 (s, 2H), 3.04-2.99 (m, 2H), 2.97-2.92 (m, 2H), 2.47-2.39 (m, 2H);

$^{13}\text{C NMR}$  (100 MHz,  $\text{CDCl}_3$ )  $\delta$ : 191.8, 167.4, 157.5, 145.7, 140.5, 140.0, 134.5, 134.4, 129.1, 128.3, 120.2, 51.1, 29.7, 29.0, 28.1.

**HRMS (ESI)** calcd for  $\text{C}_{17}\text{H}_{15}\text{N}_2\text{O}_2\text{S}$ :  $[\text{M}+\text{H}]^+$  308.0614. Found:  $m/z$  308.0619.

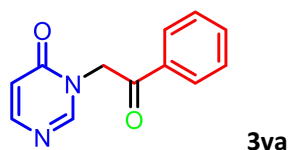

### 3-(2-oxo-2-phenylethyl)pyrimidin-4(3H)-one (3va)

According to the general procedure, **3va** was obtained using pyrimidin-4(3H)-one **1v** (19.2 mg, 0.2 mmol) and styrene **2a** (41.7 mg, 46.0  $\mu\text{L}$ , 0.4 mmol) in 68% yield (29.1 mg) as a white solid (silica gel flash chromatography: petroleum ether/EtOAc = 3:1)

$^1\text{H NMR}$  (400 MHz,  $\text{CDCl}_3$ )  $\delta$ : 8.02 (s, 1H), 7.96-7.94 (m, 2H), 7.88 (d,  $J = 9.2$  Hz, 1H), 7.63-7.58 (m, 1H), 7.49-7.45 (m, 2H), 6.42 (d,  $J = 6.4$  Hz, 1H), 5.32 (s, 2H);

$^{13}\text{C NMR}$  (100 MHz,  $\text{CDCl}_3$ )  $\delta$ : 191.1, 160.6, 153.8, 151.9, 134.4, 134.2, 129.0, 128.2, 115.8, 51.3.

**HRMS (ESI)** calcd for  $\text{C}_{12}\text{H}_{11}\text{N}_2\text{O}_2$ :  $[\text{M}+\text{H}]^+$  215.0815. Found:  $m/z$  215.0823.

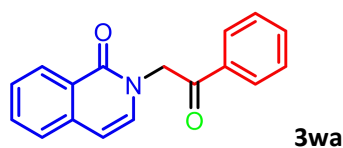

### 2-(2-oxo-2-phenylethyl)isoquinolin-1(2H)-one (3wa)

According to the general procedure, **3wa** was obtained using isoquinolin-1(2H)-one **1w** (29.0 mg, 0.2 mmol) and styrene **2a** (41.7 mg, 46.0  $\mu\text{L}$ , 0.4 mmol) in 23% yield (12.1 mg) as a white solid (silica gel flash chromatography: petroleum ether/EtOAc = 8:1)

$^1\text{H NMR}$  (400 MHz,  $\text{CDCl}_3$ )  $\delta$ : 8.43-8.40 (m, 1H), 8.07-8.05 (m, 2H), 7.95-7.61 (m, 2H), 7.56-7.47 (m, 4H), 7.02 (d,  $J = 7.2$  Hz, 1H), 6.58 (d,  $J = 8.8$  Hz, 1H), 5.45 (s, 2H);

$^{13}\text{C NMR}$  (100 MHz,  $\text{CDCl}_3$ )  $\delta$ : 193.0, 162.4, 137.5, 135.0, 134.1, 132.6, 132.1, 129.0, 128.3, 128.1, 127.1, 126.2, 126.1, 106.6, 54.4.

**HRMS (ESI)** calcd for  $C_{17}H_{14}NO_2$ :  $[M+H]^+$  264.1019. Found:  $m/z$  264.1026.

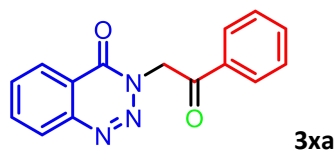

**3-(2-oxo-2-phenylethyl)benzo[d][1,2,3]triazin-4(3H)-one (3xa)**

According to the general procedure, **3xa** was obtained using benzo[d][1,2,3]triazin-4(3H)-one **1x** (29.4 mg, 0.2 mmol) and styrene **2a** (41.7 mg, 46.0  $\mu$ L, 0.4 mmol) in 34% yield (17.5 mg) as a white solid (silica gel flash chromatography: petroleum ether/EtOAc = 3:1).

**$^1H$  NMR** (400 MHz,  $CDCl_3$ )  $\delta$ : 8.35-8.32 (m, 1H), 8.17 (d,  $J$  = 8.4 Hz, 1H), 8.05-8.03 (m, 2H), 7.98-7.93 (m, 1H), 7.82-7.78 (m, 1H), 7.65-7.60 (m, 1H), 7.53-7.49 (m, 2H), 5.90 (s, 2H);

**$^{13}C$  NMR** (100 MHz,  $CDCl_3$ )  $\delta$ : 191.1, 155.8, 144.5, 135.1, 134.6, 134.2, 132.6, 129.0, 128.6, 128.2, 125.2, 119.8, 77.5, 77.2, 76.8, 55.6.

**HRMS (ESI)** calcd for  $C_{15}H_{12}N_3O_2$ :  $[M+H]^+$  266.0924. Found:  $m/z$  266.0923.

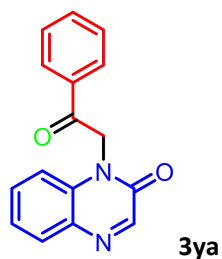

**1-(2-oxo-2-phenylethyl)quinoxalin-2(1H)-one (3ya)**

According to the general procedure, **3ya** was obtained using quinoxalin-2(1H)-one **1y** (29.2 mg, 0.2 mmol) and styrene **2a** (41.7 mg, 46.0  $\mu$ L, 0.4 mmol) in 58% yield (30.6 mg) as a white solid (silica gel flash chromatography: petroleum ether/EtOAc = 3:1)

**$^1H$  NMR** (400 MHz,  $CDCl_3$ )  $\delta$ : 8.37 (s, 1H), 8.08-8.06 (m, 2H), 7.93-7.91 (m, 1H), 7.70-7.66 (m, 1H), 7.58-7.54 (m, 2H), 7.51-7.46 (m, 1H), 7.37-7.32 (m, 1H), 6.99-6.97 (m, 1H), 5.74 (s, 2H);

**$^{13}C$  NMR** (100 MHz,  $CDCl_3$ )  $\delta$ : 190.9, 154.9, 149.9, 134.6, 133.6, 132.8, 131.3, 130.9, 129.2, 128.3, 124.0, 113.8, 48.2.

**HRMS (ESI)** calcd for  $C_{16}H_{12}N_2NaO_2$ :  $[M+Na]^+$  287.0791. Found:  $m/z$  287.0793.

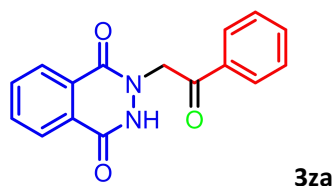

### 2-(2-oxo-2-phenylethyl)-2,3-dihydrophthalazine-1,4-dione (**3za**)

According to the general procedure, **3za** was obtained using 2,3-dihydrophthalazine-1,4-dione **1z** (32.4 mg, 0.2 mmol) and styrene **2a** (41.7 mg, 46.0  $\mu$ L, 0.4 mmol) in 41% yield (23.0 mg) as a white solid (silica gel flash chromatography: petroleum ether/EtOAc = 2:1).

$^1\text{H NMR}$  (400 MHz, DMSO- $d_6$ )  $\delta$ : 11.87 (s, 1H), 8.24-8.22 (m, 1H), 8.08-8.06 (m, 1H), 8.04-7.97 (m, 3H), 7.72-7.67 (m, 1H), 7.59-7.55 (m, 2H), 5.80 (s, 2H);

$^{13}\text{C NMR}$  (100 MHz, DMSO- $d_6$ )  $\delta$ : 193.6, 158.8, 148.8, 134.2, 134.0, 133.8, 132.5, 129.0, 128.7, 127.8, 126.3, 124.2, 123.5, 68.6.

**HRMS (ESI)** calcd for  $\text{C}_{16}\text{H}_{12}\text{N}_2\text{NaO}_3$ :  $[\text{M}+\text{Na}]^+$  303.0740. Found:  $m/z$  303.0731.

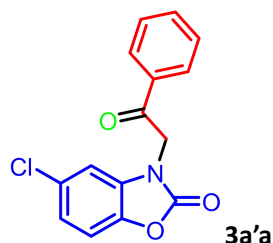

### 5-chloro-3-(2-oxo-2-phenylethyl)benzo[d]oxazol-2(3H)-one (**3a'a**)

According to the general procedure, **3a'a** was obtained using 5-chlorobenzo[d]oxazol-2(3H)-one **1a'** (38.4 mg, 0.2 mmol) and styrene **2a** (41.7 mg, 46.0  $\mu$ L, 0.4 mmol) in 73% yield (41.9 mg) as a white solid (silica gel flash chromatography: petroleum ether/EtOAc = 1:1).

$^1\text{H NMR}$  (400 MHz,  $\text{CDCl}_3$ )  $\delta$ : 8.03-8.00 (m, 2H), 7.70-7.66 (m, 1H), 7.57-7.53 (m, 2H), 7.17-7.15 (m, 1H), 7.11-7.09 (m, 1H), 6.83 (d,  $J = 2.0$  Hz, 1H), 5.23 (s, 2H);

$^{13}\text{C NMR}$  (100 MHz,  $\text{CDCl}_3$ )  $\delta$ : 190.4, 154.6, 141.3, 134.7, 134.0, 132.2, 129.7, 129.3, 128.3, 122.8, 111.2, 109.4, 48.2.

**HRMS (ESI)** calcd for  $\text{C}_{15}\text{H}_{11}\text{ClNO}_3$ :  $[\text{M}+\text{H}]^+$  310.0241. Found:  $m/z$  310.0247.

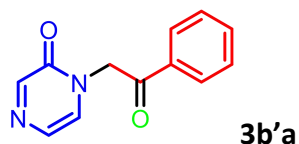

### 1-(2-oxo-2-phenylethyl)pyrazin-2(1H)-one (**3b'a**)

According to the general procedure, **3b'a** was obtained using pyrazin-2(1H)-one **1b'** (19.2 mg, 0.2 mmol) and styrene **2a** (41.7 mg, 46.0  $\mu$ L, 0.4 mmol) in 70% yield (30.0 mg) as a white solid (silica gel flash chromatography: petroleum ether/EtOAc = 1:1).

**<sup>1</sup>H NMR** (400 MHz, CDCl<sub>3</sub>) δ: 8.18 (d, *J* = 1.6 Hz, 1H), 8.00-7.97 (m, 2H), 7.67-7.62 (m, 1H), 7.54-7.49 (m, 2H), 7.36 (d, *J* = 4.4 Hz, 1H), 7.04 (dd, *J* = 4.4, 1.2 Hz, 1H), 5.34 (s, 2H);

**<sup>13</sup>C NMR** (100 MHz, CDCl<sub>3</sub>) δ: 190.8, 155.9, 149.7, 134.6, 134.3, 129.5, 129.2, 128.3, 123.8, 77.5, 77.2, 76.8, 53.8.

**HRMS (ESI)** calcd for C<sub>12</sub>H<sub>11</sub>N<sub>2</sub>O<sub>2</sub>: [M+H]<sup>+</sup> 215.0815. Found: *m/z* 215.0823.

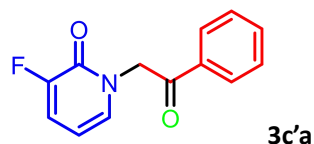

### 3-fluoro-1-(2-oxo-2-phenylethyl)pyridin-2(1H)-one (3c'a)

According to the general procedure, **3c'a** was obtained using 3-fluoropyridin-2(1H)-one **1c'** (22.6 mg, 0.2 mmol) and styrene **2a** (41.7 mg, 46.0 μL, 0.4 mmol) in 63% yield (29.1 mg) as a white solid (silica gel flash chromatography: petroleum ether/EtOAc = 1:1).

**<sup>1</sup>H NMR** (400 MHz, CDCl<sub>3</sub>) δ: 8.00-7.97 (m, 2H), 7.64-7.60 (m, 1H), 7.51-7.47 (m, 2H), 7.15-7.10 (m, 1H), 7.06-7.03 (m, 1H), 6.16-6.11 (m, 1H), 5.43 (s, 2H);

**<sup>13</sup>C NMR** (100 MHz, CDCl<sub>3</sub>) δ: 191.7, 156.3 (d, *J* = 26.0 Hz), 152.5 (d, *J* = 248.0 Hz), 134.5, 134.3, 133.7 (d, *J* = 5.0 Hz), 129.0, 128.2, 120.8 (d, *J* = 16.0 Hz), 103.9 (d, *J* = 6.0 Hz), 54.4 (d, *J* = 2.0 Hz).

**<sup>19</sup>F NMR** (376 MHz, CDCl<sub>3</sub>) δ: -130.47.

**HRMS (ESI)** calcd for C<sub>13</sub>H<sub>11</sub>FNO<sub>2</sub>: [M+H]<sup>+</sup> 254.0588. Found: *m/z* 254.0596.

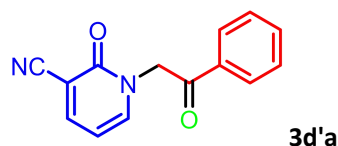

### 2-oxo-1-(2-oxo-2-phenylethyl)-1,2-dihydropyridine-3-carbonitrile (3d'a)

According to the general procedure, **3d'a** was obtained using 2-oxo-1,2-dihydropyridine-3-carbonitrile **1d'** (24.0 mg, 0.2 mmol) and styrene **2a** (41.7 mg, 46.0 μL, 0.4 mmol) in 65% yield (30.9 mg) as a white solid (silica gel flash chromatography: petroleum ether/EtOAc = 3:1)

**<sup>1</sup>H NMR** (400 MHz, DMSO-*d*<sub>6</sub>) δ: 8.25 (dd, *J* = 7.2, 2.0 Hz, 1H), 8.16-8.14 (m, 1H), 8.07-8.05 (m, 2H), 7.76-7.71 (m, 1H), 7.62-7.59 (m, 2H), 6.54-6.50 (m, 1H), 5.67 (s, 2H);

**<sup>13</sup>C NMR** (100 MHz, DMSO-*d*<sub>6</sub>) δ: 192.1, 159.3, 149.1, 146.2, 134.3, 134.2, 129.1, 128.1, 116.28, 105.6, 102.7, 55.8.

**HRMS (ESI)** calcd for  $C_{14}H_{10}N_2NaO_2$ :  $[M+Na]^+$  261.0634. Found:  $m/z$  261.0641.

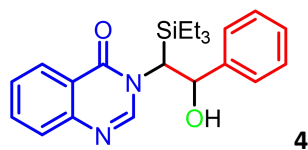

### **3-(2-hydroxy-2-phenyl-1-(triethylsilyl)ethyl)quinazolin-4(3H)-one (4)**

General procedure for the preparation of **4**: Reactions were performed: **3aa** (0.2 mmol, 52.8 mg), triethylsilane (0.4 mmol, 46.5 mg, 64.0  $\mu$ L),  $Pd(OAc)_2$  (1 mol%) were added to DMF (3.0 mL) under air atmosphere at 80 °C. Then stirred for 3h. The resulting yellow mixture was concentrated under vacuum, the crude product was purified by flash column chromatography using petroleum ether/ EtOAc (30:1) to give the compound **4** in 89% yield (67.7 mg) as a colourless liquid.

**$^1H$  NMR** (400 MHz,  $CDCl_3$ )  $\delta$ : 8.12-8.10 (m, 1H), 7.81 (s, 1H), 7.55-7.48 (m, 2H), 7.30-7.22 (m, 3H), 7.16-7.12 (m, 2H), 7.10-7.05 (m, 1H), 4.88 (dd,  $J = 9.2, 3.2$  Hz, 1H), 4.22 (dd,  $J = 13.6, 3.2$  Hz, 1H), 3.41 (dd,  $J = 13.2, 9.2$  Hz, 1H), 0.48 (t,  $J = 8.0$  Hz, 9H), 0.17-0.11 (m, 6H);

**$^{13}C$  NMR** (100 MHz,  $CDCl_3$ )  $\delta$ : 161.3, 148.2, 147.6, 141.5, 134.2, 128.5, 128.1, 127.4, 127.1, 126.5, 125.9, 121.9, 72.0, 55.3, 6.4, 4.4.

**HRMS (ESI)** calcd for  $C_{22}H_{28}N_2NaO_2Si$ :  $[M+Na]^+$  403.1812. Found:  $m/z$  403.1815.

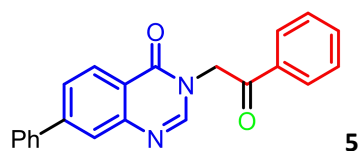

### **3-(2-oxo-2-phenylethyl)-7-phenylquinazolin-4(3H)-one (5)**

General procedure for the preparation of **5**: Reactions were performed: **3na** (0.2 mmol, 68.6 mg), phenylboronic acid (0.4 mmol, 48.8 mg),  $Pd(PPh_3)_4$  (1 mol%),  $K_3PO_4$  (0.4 mmol, 84.9 mg),  $H_2O$  (1.0 mL) were added to DMSO (2.0 mL) under  $N_2$  atmosphere at 100 °C. Then stirred for 5h. The resulting yellow mixture was concentrated under vacuum, the crude product was purified by flash column chromatography using petroleum ether/ EtOAc (1:1) to give the compound **5** in 83% yield (56.5 mg) as a white solid.

**$^1H$  NMR** (400 MHz,  $CDCl_3$ )  $\delta$ : 8.33 (d,  $J = 8.0$  Hz, 1H), 8.05-8.02 (m, 2H), 8.01 (s, 1H), 7.96 (s, 1H), 7.75-7.73 (m, 1H), 7.71-7.69 (m, 2H), 7.66-7.62 (m, 1H), 7.54-7.48 (m, 4H), 7.45-7.41 (m, 1H), 5.44 (s, 2H);

**$^{13}C$  NMR** (100 MHz,  $CDCl_3$ )  $\delta$ : 191.8, 161.0, 148.7, 147.4, 147.2, 139.6, 134.4, 134.4, 129.2,

129.1, 128.6, 128.3, 127.6, 127.4, 126.6, 125.7, 120.7, 51.4.

**HRMS (ESI)** calcd for C<sub>22</sub>H<sub>17</sub>N<sub>2</sub>O<sub>2</sub>: [M+H]<sup>+</sup> 341.1285. Found: m/z 341.1291.

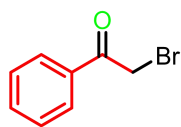

**2-bromo-1-phenylethan-1-one (8)**

General procedure for the preparation of **8**: Reactions were performed: **2a** (0.4 mmol, 41.7 mg, 46.0 μL), <sup>n</sup>Bu<sub>4</sub>NBr (0.4 mmol, 128.9 mg), 4CzIPN (2 mol%, 3.2 mg), <sup>n</sup>Bu<sub>4</sub>NClO<sub>4</sub> (0.4 mmol, 136.8 mg), HFIP (0.4 mmol, 67.2 mg, 42.0 μL), were added to DMF (3.0 mL) under air atmosphere at room temperature. Then stirred for 12 h. The resulting yellow mixture was concentrated under vacuum, the crude product was purified by flash column chromatography using petroleum ether/ EtOAc (30:1) to give the compound **8** in 77 % yield (61.0 mg) as a brown liquid.

<sup>1</sup>H NMR (400 MHz, CDCl<sub>3</sub>) δ: 7.98-7.95 (m, 2H), 7.61-7.57 (m, 1H), 7.49-7.45 (m, 2H), 4.45 (s, 2H).

<sup>13</sup>C NMR (100 MHz, CDCl<sub>3</sub>) δ: 191.3, 134.0, 134.0, 128.9, 128.9, 31.1.

**HRMS (ESI)** calcd for C<sub>8</sub>H<sub>8</sub>BrO: [M+H]<sup>+</sup> 198.9753. Found: m/z 198.9753.

### Crystal of **3ia**

The crystal of **3ia** suitable for crystallographic analysis was grown from  $\text{CHCl}_3$  by slow crystallization in 10 mL flat bottom bottle.

Crystal data for md\_zxjb1:  $\text{C}_{16}\text{H}_{11}\text{BrN}_2\text{O}_2$ ,  $M = 343.18$ ,  $a = 29.6679(9)$  Å,  $b = 9.0807(3)$  Å,  $c = 10.2318(3)$  Å,  $\alpha = 90^\circ$ ,  $\beta = 100.2330(10)^\circ$ ,  $\gamma = 90^\circ$ ,  $V = 2712.65(15)$  Å<sup>3</sup>,  $T = 150.(2)$  K, space group  $C12/c1$ ,  $Z = 8$ ,  $\mu(\text{Cu K}\alpha) = 4.188$  mm<sup>-1</sup>, 12466 reflections measured, 2658 independent reflections ( $R_{int} = 0.0612$ ). The final  $R_I$  values were 0.0559 ( $I > 2\sigma(I)$ ). The final  $wR(F^2)$  values were 0.1413 ( $I > 2\sigma(I)$ ). The final  $R_I$  values were 0.0580 (all data). The final  $wR(F^2)$  values were 0.1449 (all data). The goodness of fit on  $F^2$  was 1.061.

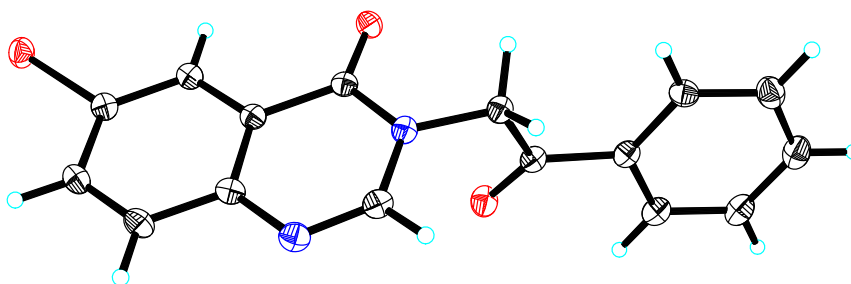

View of a molecule of md\_zxjb1.

Displacement ellipsoids are drawn at the 30% probability level.

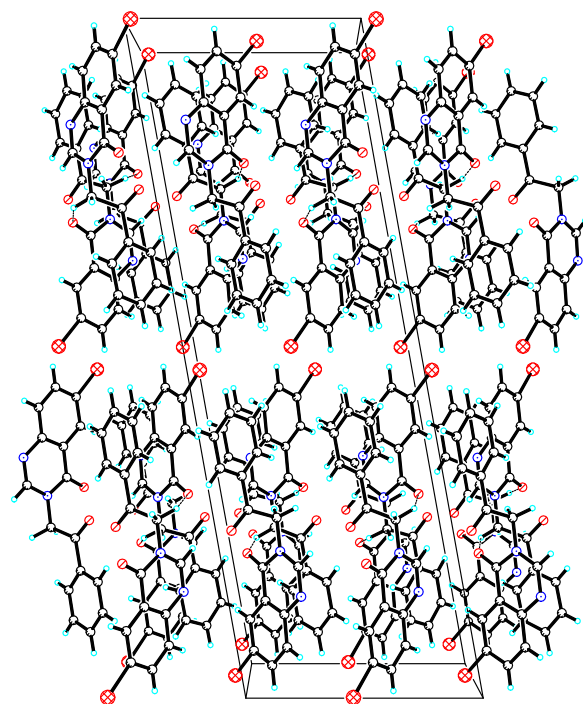

View of the pack drawing of md\_zxjb1.

Hydrogen-bonds are shown as dashed lines.

Table 1. Crystal data and structure refinement for md\_zxjb1\_0m.

|                      |                                                                  |                    |
|----------------------|------------------------------------------------------------------|--------------------|
| Identification code  | global                                                           |                    |
| Empirical formula    | C <sub>16</sub> H <sub>11</sub> Br N <sub>2</sub> O <sub>2</sub> |                    |
| Formula weight       | 343.18                                                           |                    |
| Temperature          | 150(2) K                                                         |                    |
| Wavelength           | 1.54178 Å                                                        |                    |
| Crystal system       | Monoclinic                                                       |                    |
| Space group          | C 1 2/c 1                                                        |                    |
| Unit cell dimensions | a = 29.6679(9) Å                                                 | α = 90°.           |
|                      | b = 9.0807(3) Å                                                  | β = 100.2330(10)°. |
|                      | c = 10.2318(3) Å                                                 | γ = 90°.           |
| Volume               | 2712.65(15) Å <sup>3</sup>                                       |                    |
| Z                    | 8                                                                |                    |



|                                   |                                                |  |
|-----------------------------------|------------------------------------------------|--|
| Density (calculated)              | 1.681 Mg/m <sup>3</sup>                        |  |
| Absorption coefficient            | 4.188 mm <sup>-1</sup>                         |  |
| F(000)                            | 1376                                           |  |
| Crystal size                      | 0.400 x 0.360 x 0.180 mm <sup>3</sup>          |  |
| Theta range for data collection   | 3.03 to 72.00°.                                |  |
| Index ranges                      | -36<=h<=32, -11<=k<=10,<br>-12<=l<=12          |  |
| Reflections collected             | 12466                                          |  |
| Independent reflections           | 2658 [R(int) = 0.0612]                         |  |
| Completeness to theta =<br>72.00° | 99.6 %                                         |  |
| Absorption correction             | Semi-empirical from<br>equivalents             |  |
| Max. and min. transmission        | 0.52 and 0.22                                  |  |
| Refinement method                 | Full-matrix least-squares on<br>F <sup>2</sup> |  |
| Data / restraints / parameters    | 2658 / 0 / 191                                 |  |
| Goodness-of-fit on F <sup>2</sup> | 1.061                                          |  |
| Final R indices [I>2sigma(I)]     | R1 = 0.0559, wR2 = 0.1413                      |  |
| R indices (all data)              | R1 = 0.0580, wR2 = 0.1449                      |  |
| Extinction coefficient            | 0.0031(3)                                      |  |
| Largest diff. peak and hole       | 1.828 and -0.993 e.Å <sup>-3</sup>             |  |

## 5 Copies of NMR spectra

8.408  
8.170  
8.166  
8.150  
8.146  
8.117  
8.114  
8.110  
8.102  
8.097  
8.093  
8.093  
7.892  
7.888  
7.875  
7.871  
7.868  
7.854  
7.850  
7.760  
7.756  
7.753  
7.750  
7.743  
7.738  
7.733  
7.730  
7.723  
7.719  
7.716  
7.631  
7.627  
7.611  
7.596  
7.593  
7.578  
7.576  
7.573  
7.559  
7.555  
5.687  
5.686  
2.505  
2.500  
2.495  
2.491

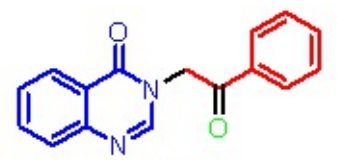

3aa

<sup>1</sup>H NMR (400 MHz, DMSO-d<sub>6</sub>)

8.408  
8.170  
8.166  
8.150  
8.146  
8.117  
8.114  
8.110  
8.097  
8.093  
7.871  
7.753  
7.750  
7.738  
7.733  
7.730  
7.631  
7.611  
7.596  
7.593  
7.576  
7.573

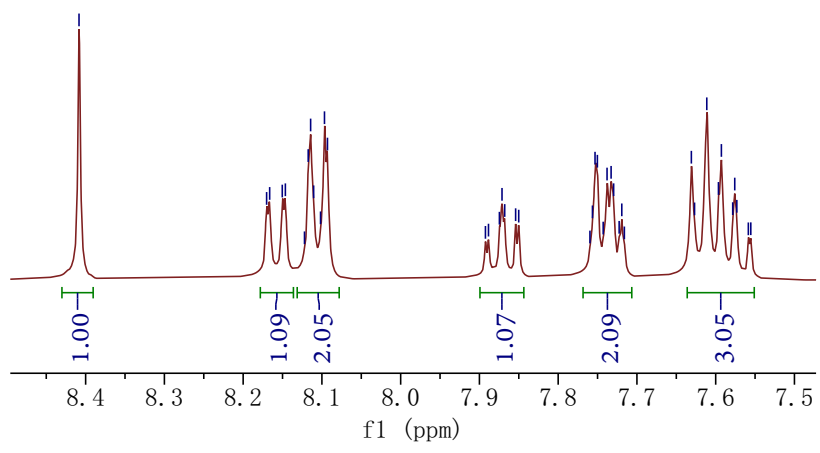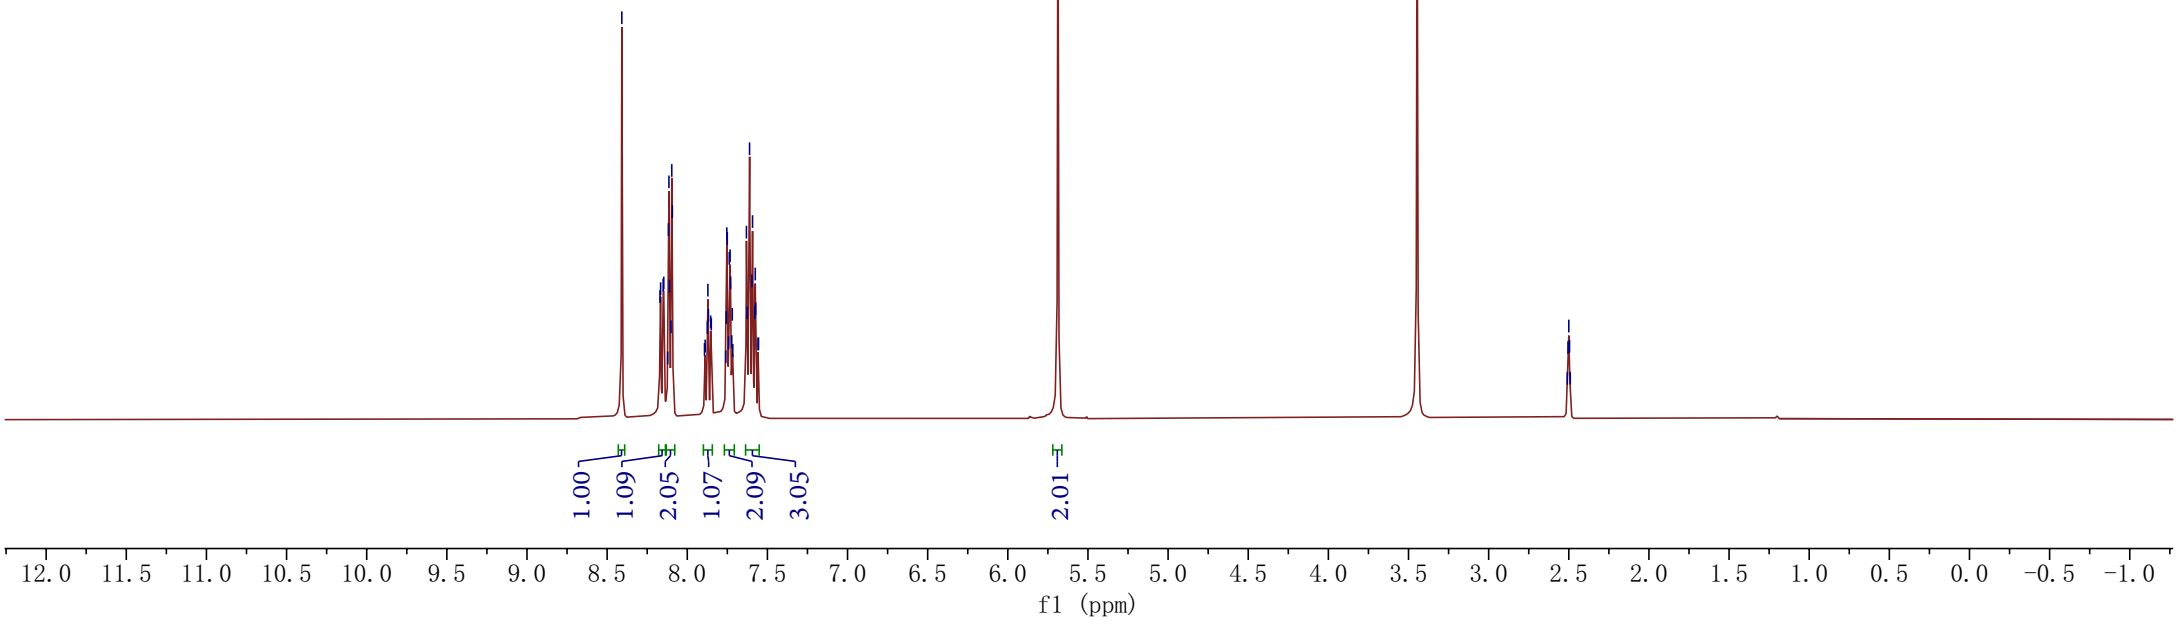

—192.86

—160.20

148.35

148.12

134.60

134.33

134.24

129.07

128.13

127.35

127.25

126.09

121.45

—52.22

40.15

39.94

39.73

39.52

39.31

39.10

38.89

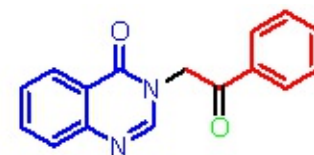

3aa

<sup>13</sup>C NMR (100 MHz, DMSO-*d*<sub>6</sub>)

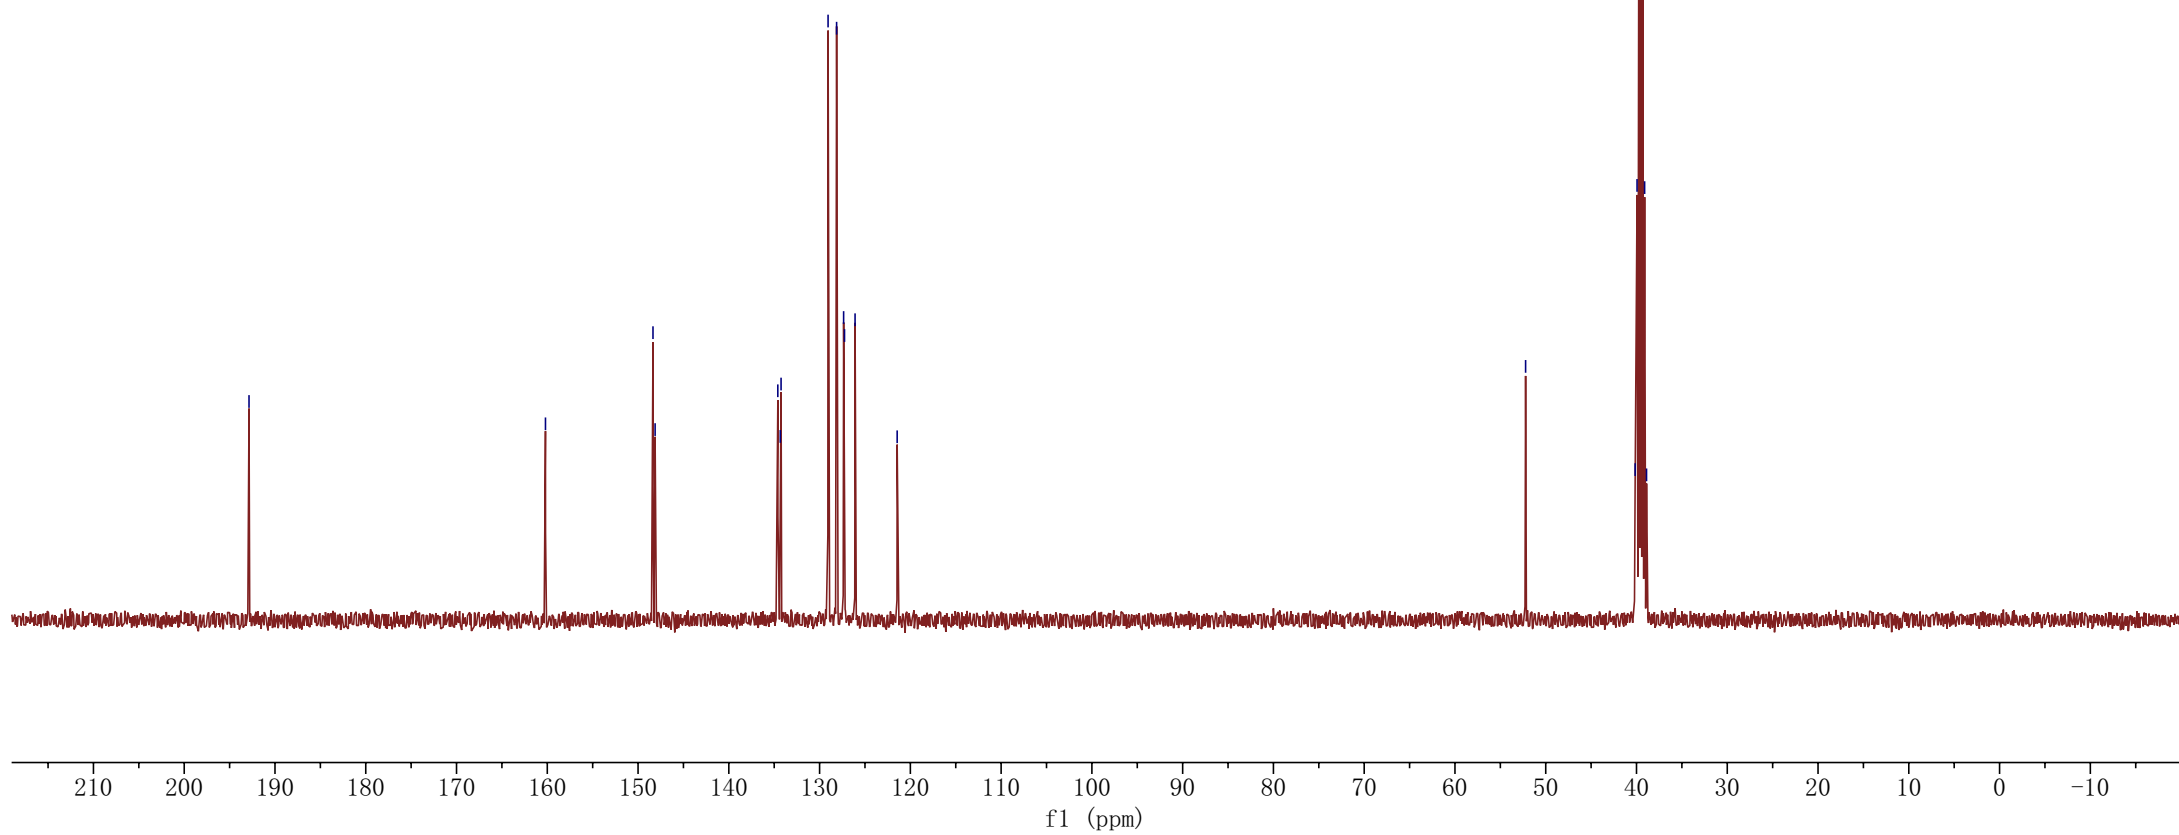

8.289  
8.285  
8.269  
8.267  
8.265  
8.025  
8.017  
8.012  
8.000  
7.995  
7.988  
7.976  
7.767  
7.763  
7.751  
7.747  
7.742  
7.726  
7.512  
7.507  
7.496  
7.492  
7.487  
7.476  
7.471  
7.260  
6.979  
6.974  
6.962  
6.957

8.289  
8.285  
8.269  
8.267  
8.265  
8.017  
8.012  
8.000  
7.995  
7.976  
7.767  
7.763  
7.751  
7.747  
7.742  
7.496  
7.492  
7.487  
7.260  
6.979  
6.974  
6.962  
6.957

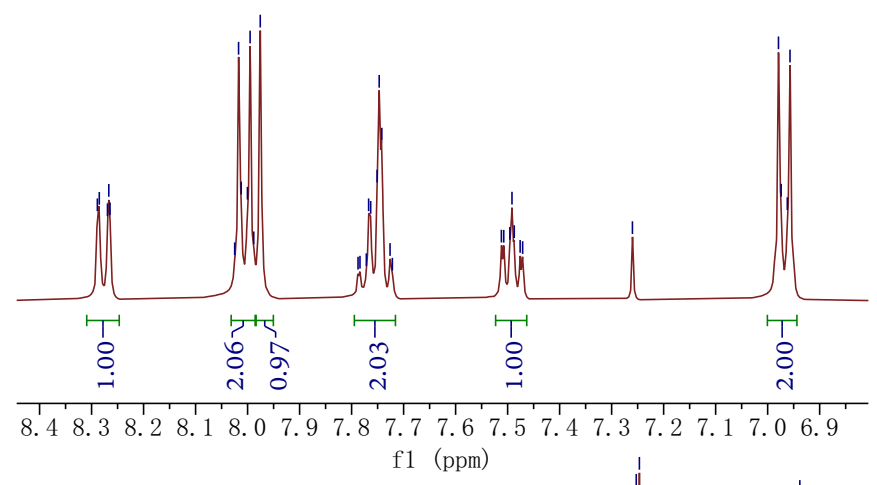

1.00  
2.06  
0.97  
2.03  
1.00  
2.00  
1.97  
3.09

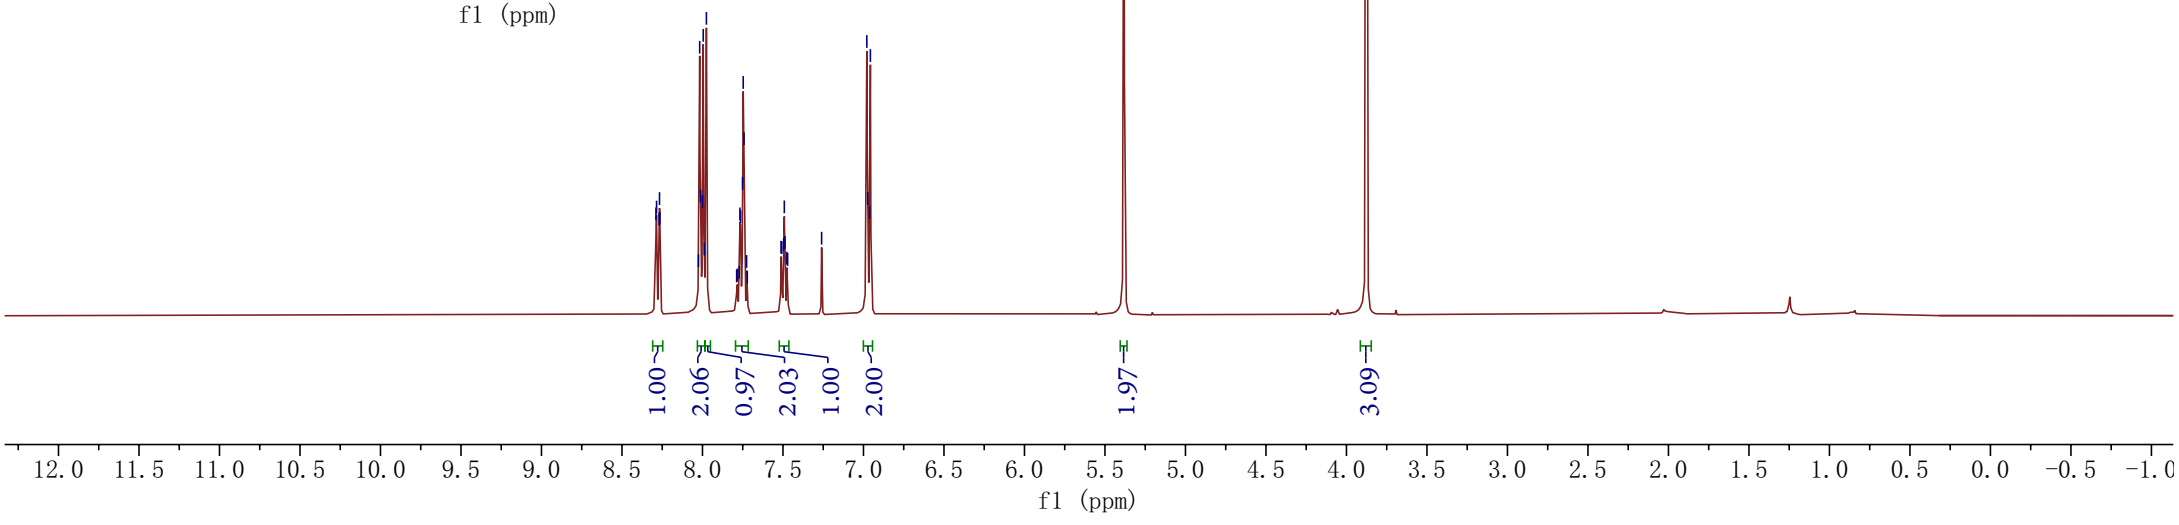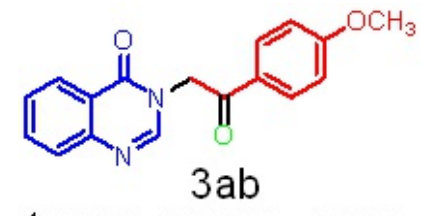

<sup>1</sup>H NMR (400 MHz, CDCl<sub>3</sub>)

—190.11

—164.54  
—161.16

~148.36  
~146.89

134.53  
130.67  
127.71  
127.51  
127.42  
126.93  
122.08  
—114.32

77.48  
77.16  
76.84

—55.70  
—51.00

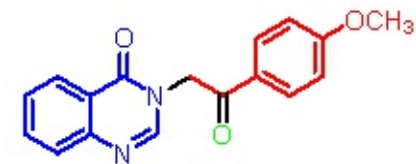

**3ab**

<sup>13</sup>C NMR (100 MHz, CDCl<sub>3</sub>)

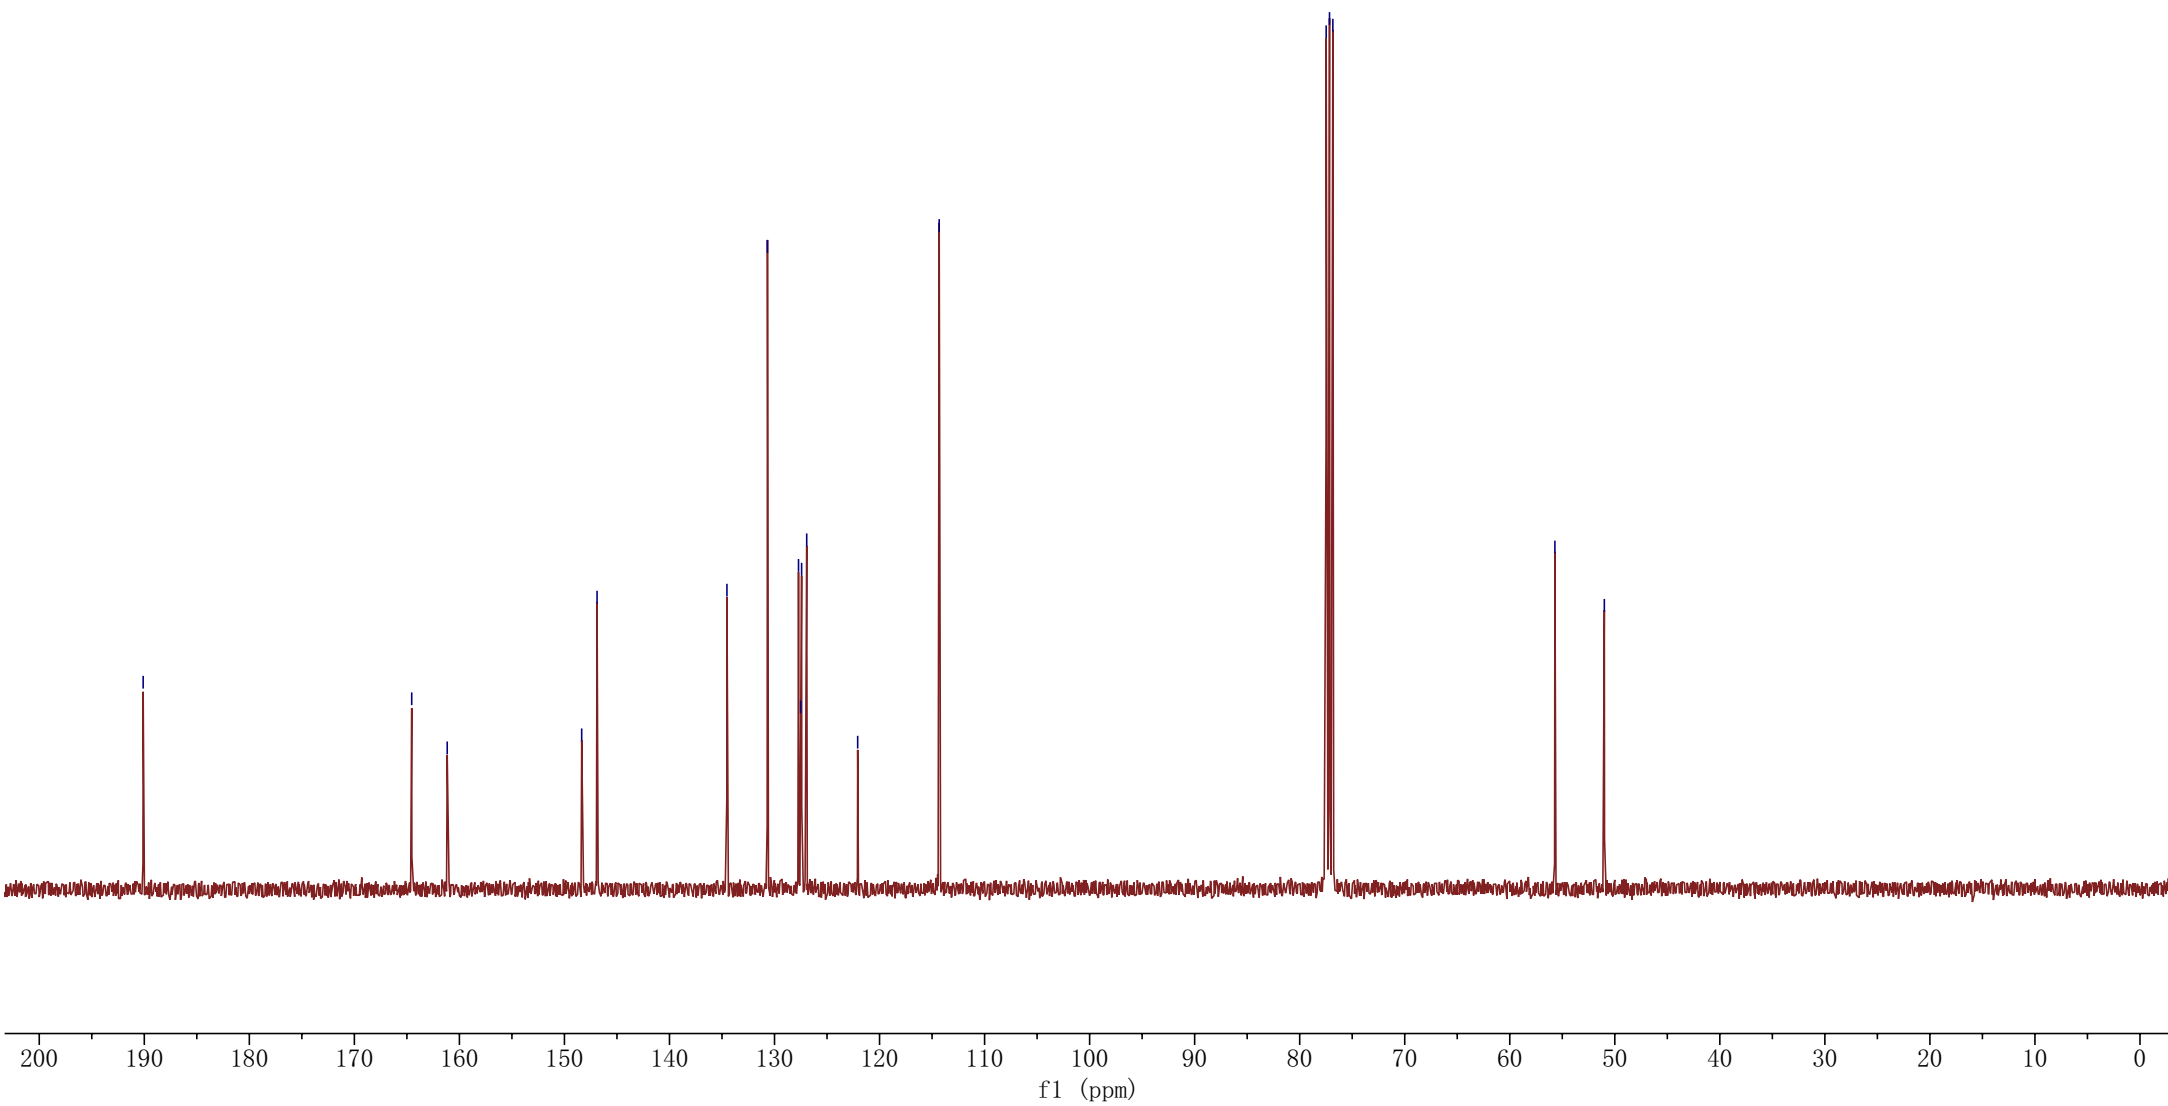

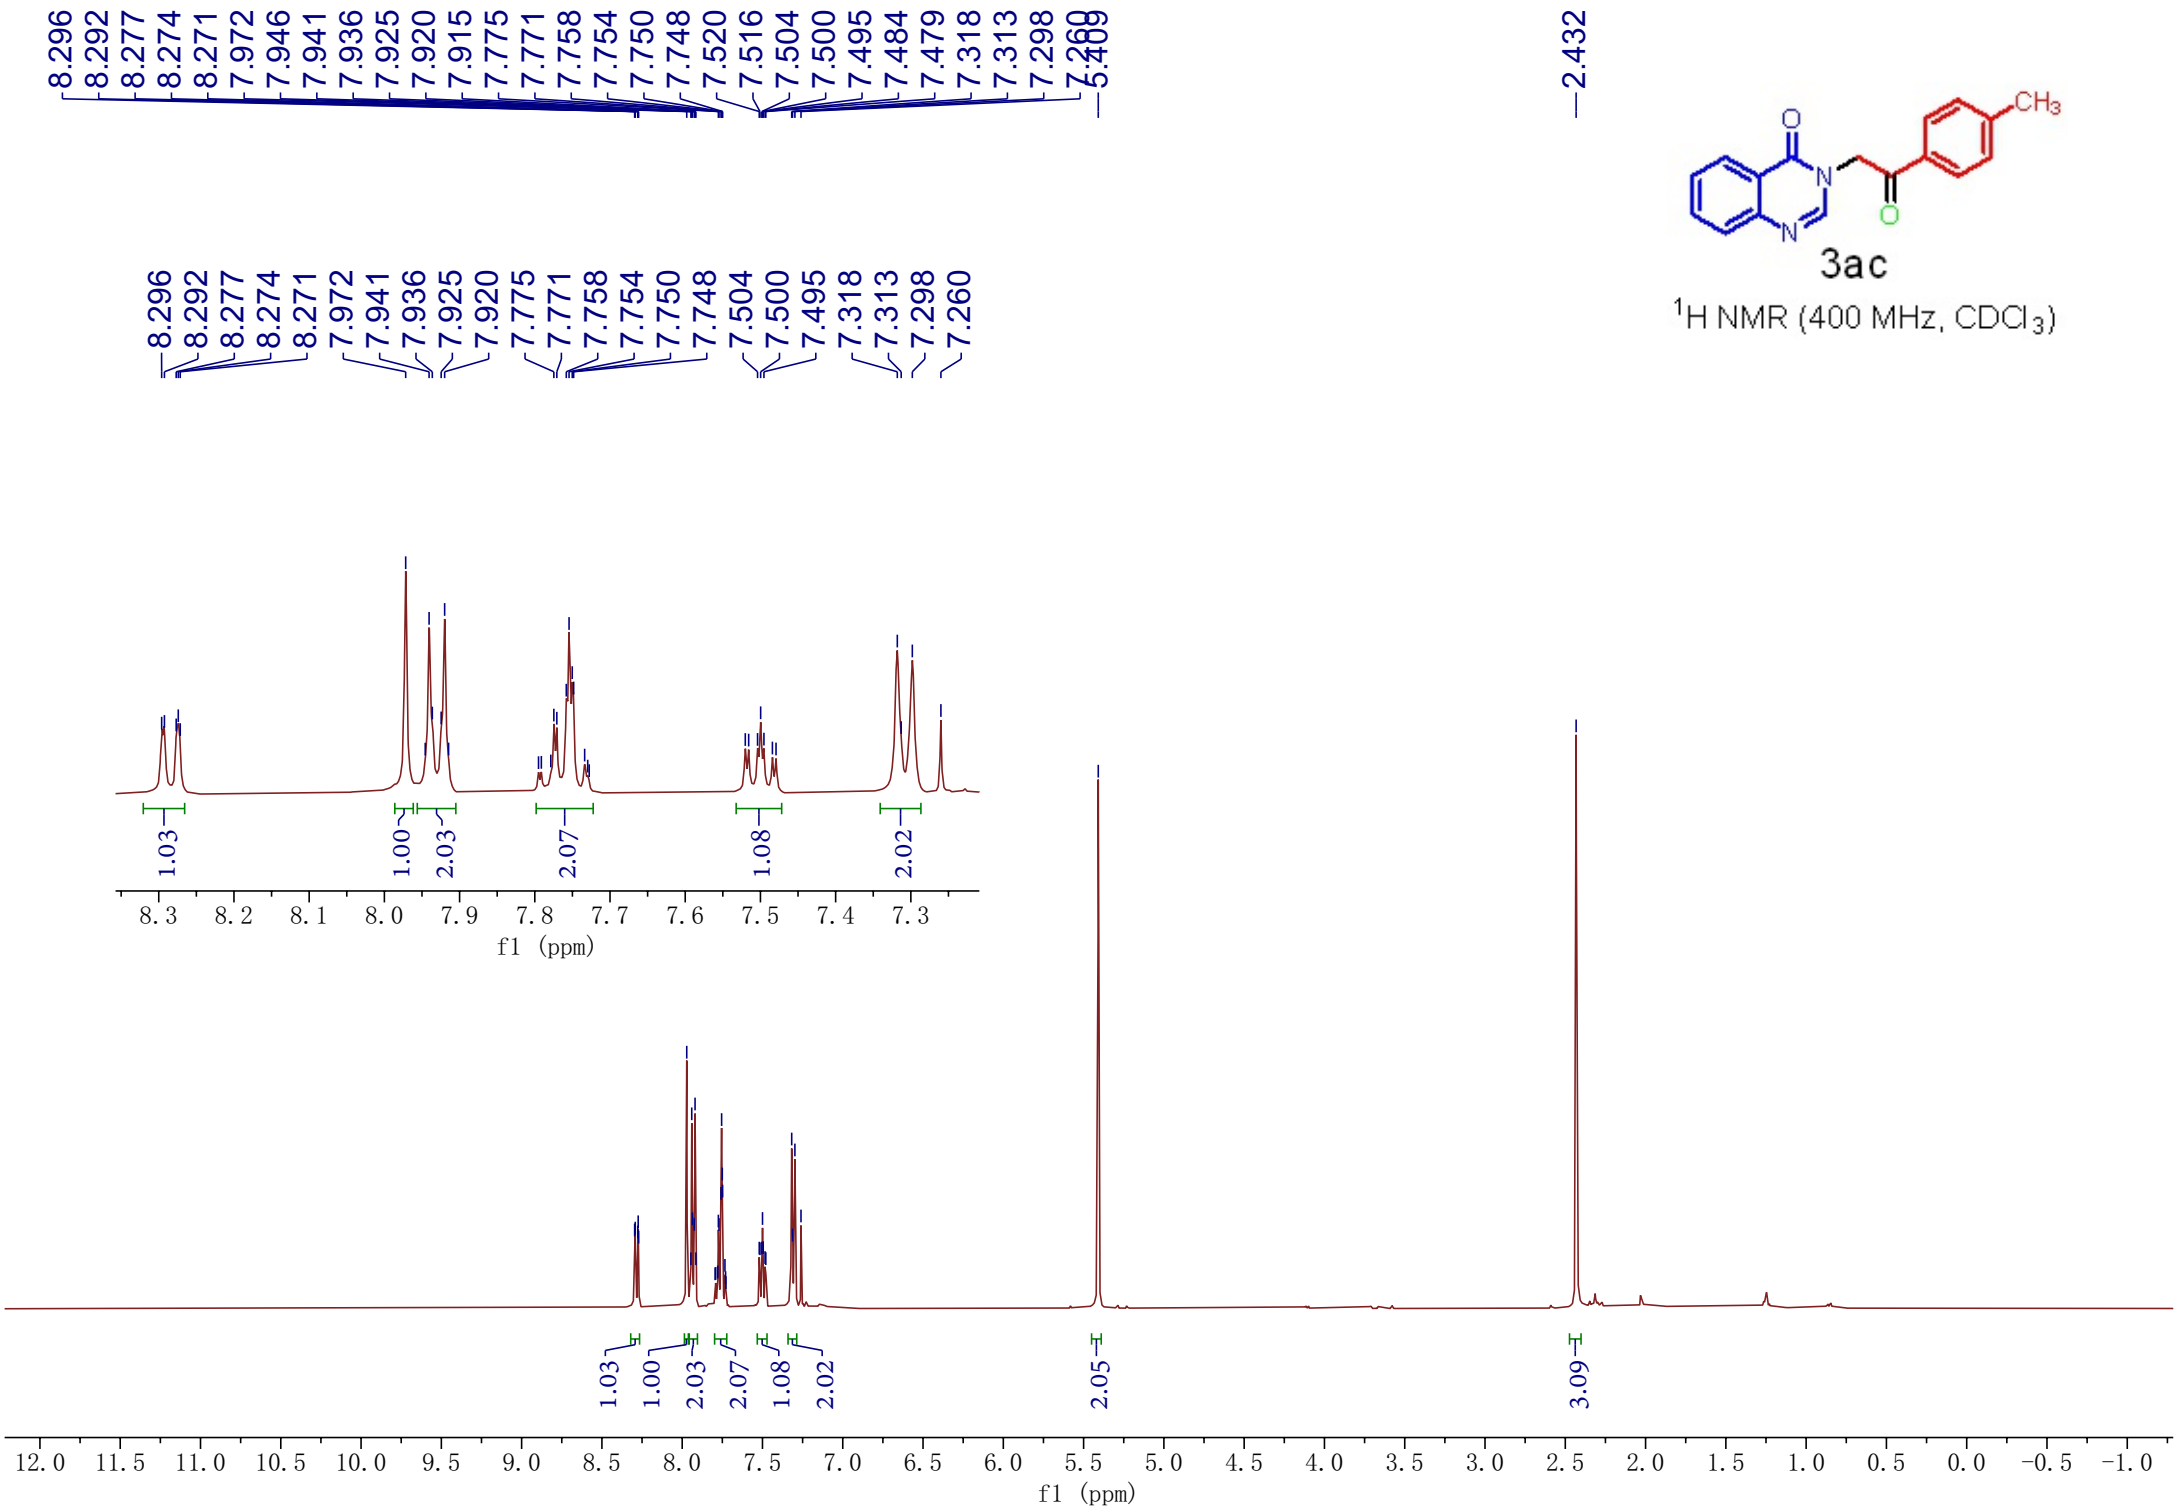

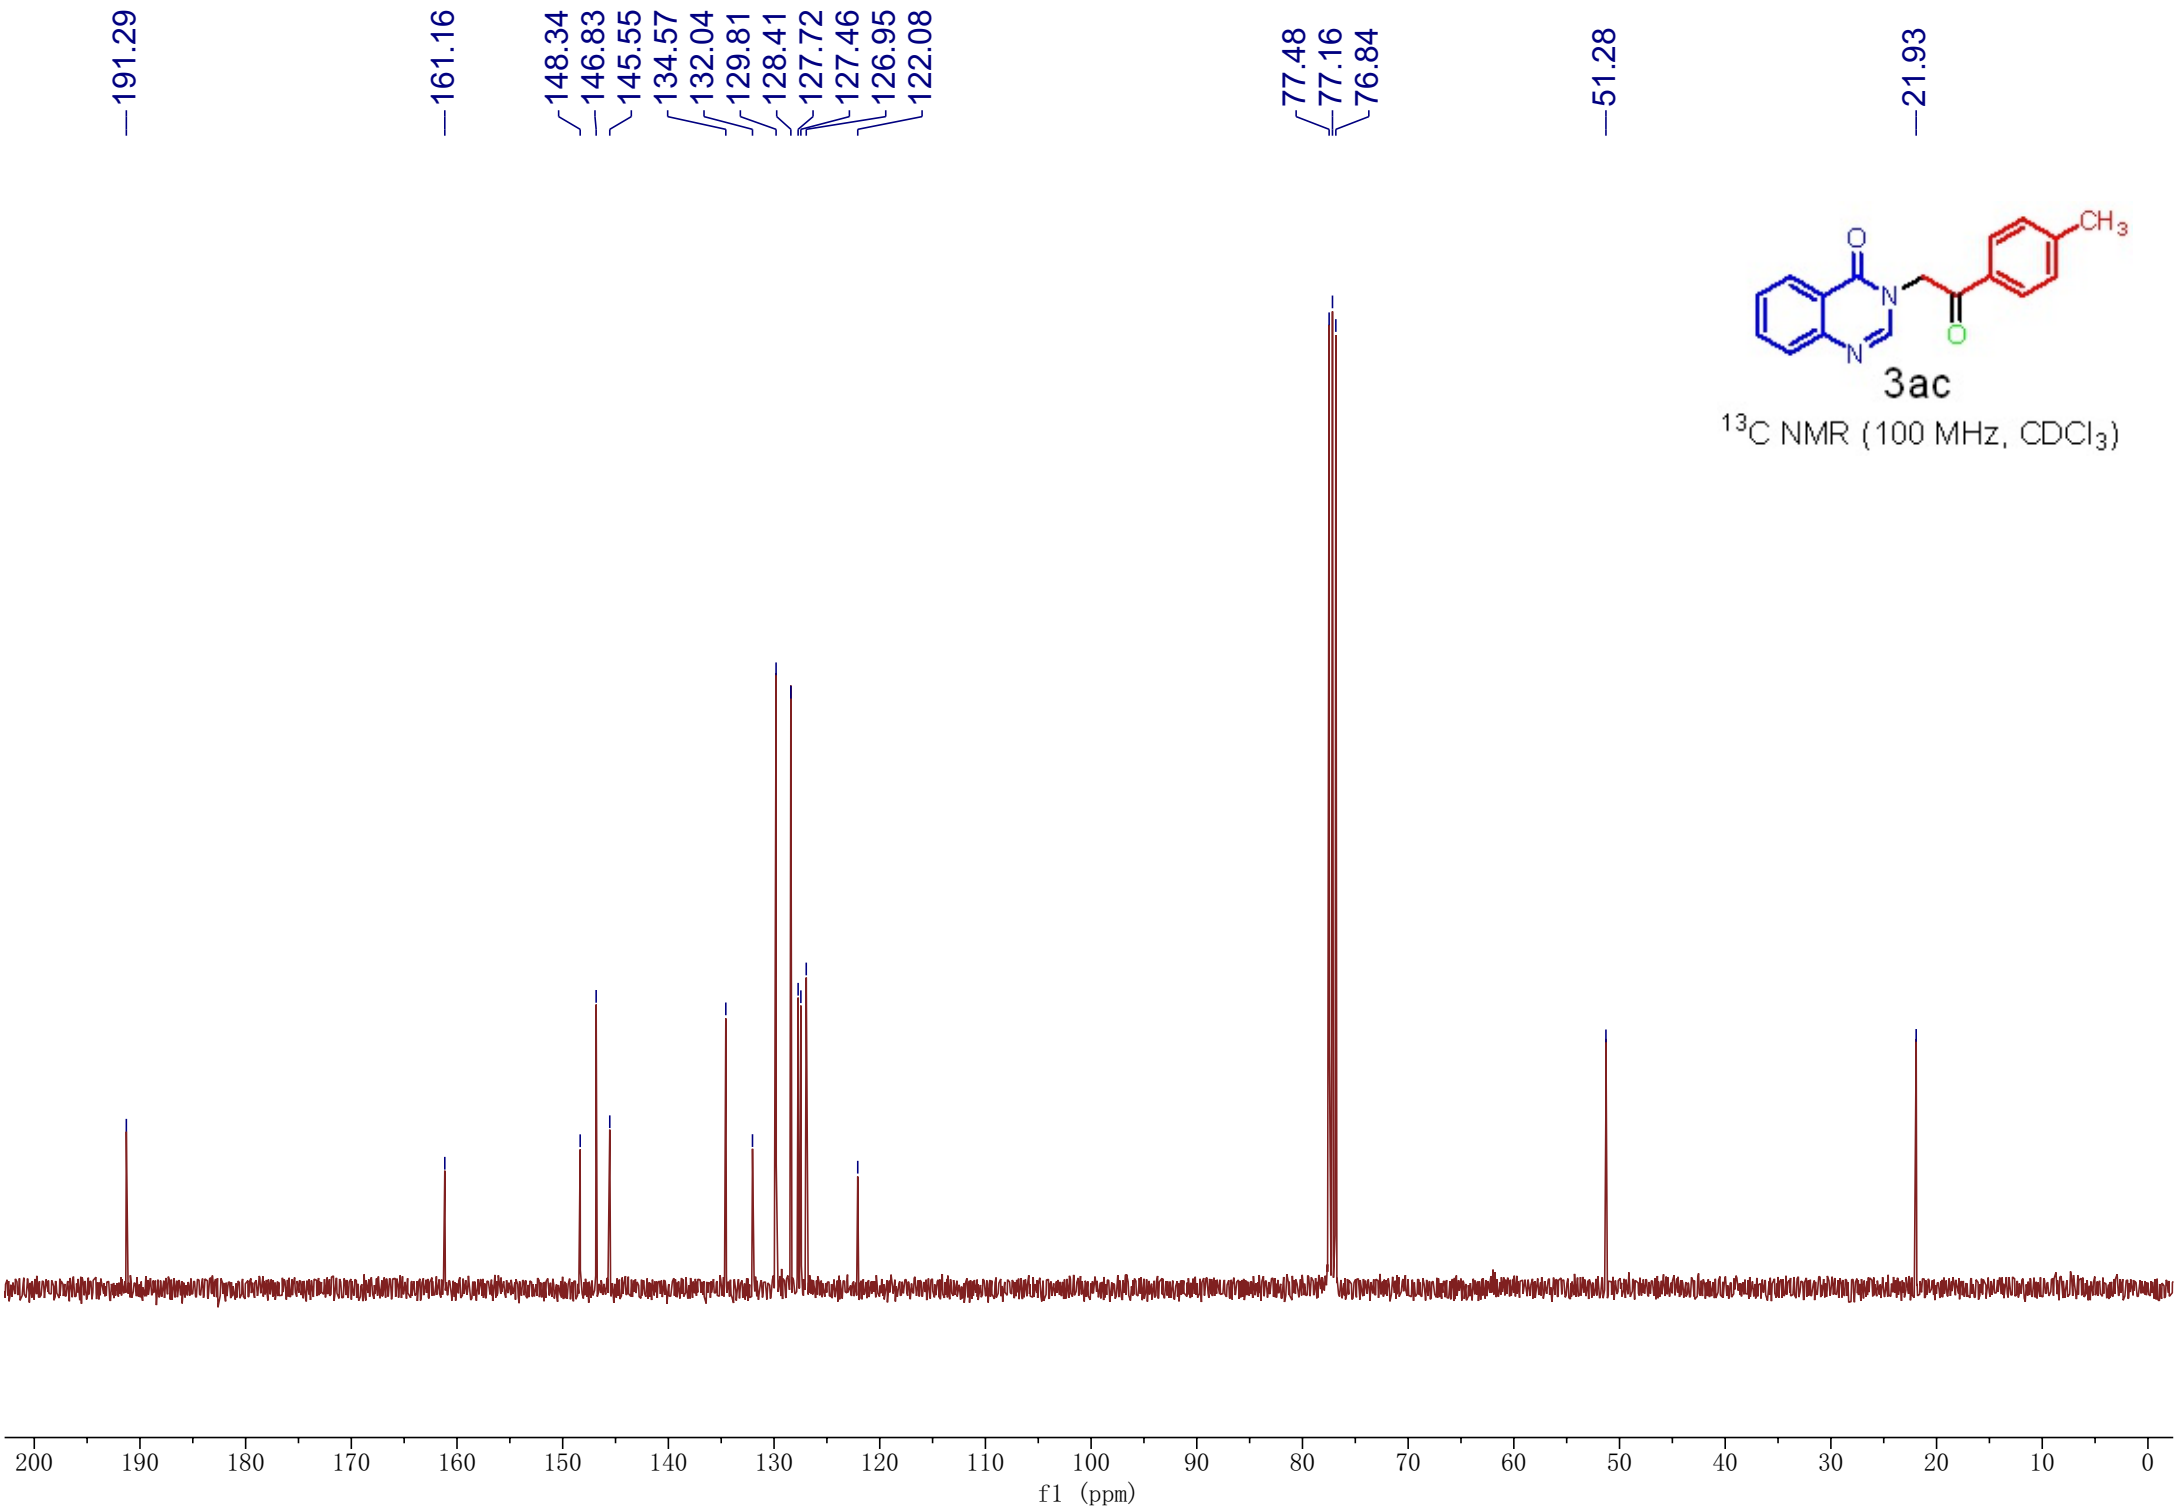

8.292  
8.290  
8.288  
8.287  
8.272  
8.269  
8.267  
7.986  
7.981  
7.970  
7.965  
7.959  
7.766  
7.762  
7.749  
7.746  
7.743  
7.741  
7.741  
7.545  
7.539  
7.534  
7.522  
7.518  
7.513  
7.508  
7.497  
7.493  
7.488  
7.412

8.292  
8.290  
8.288  
8.287  
8.272  
8.269  
8.267  
7.986  
7.981  
7.970  
7.965  
7.959  
7.766  
7.762  
7.749  
7.746  
7.743  
7.741  
7.741  
7.539  
7.534  
7.522  
7.518  
7.513  
7.508  
7.497  
7.493  
7.488

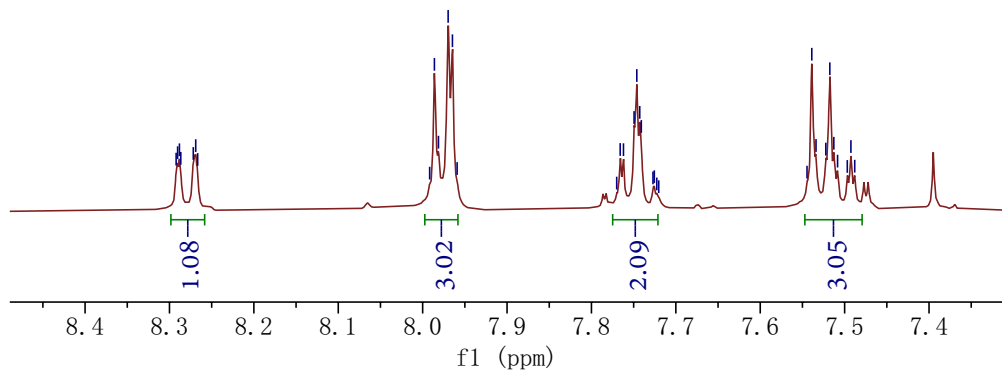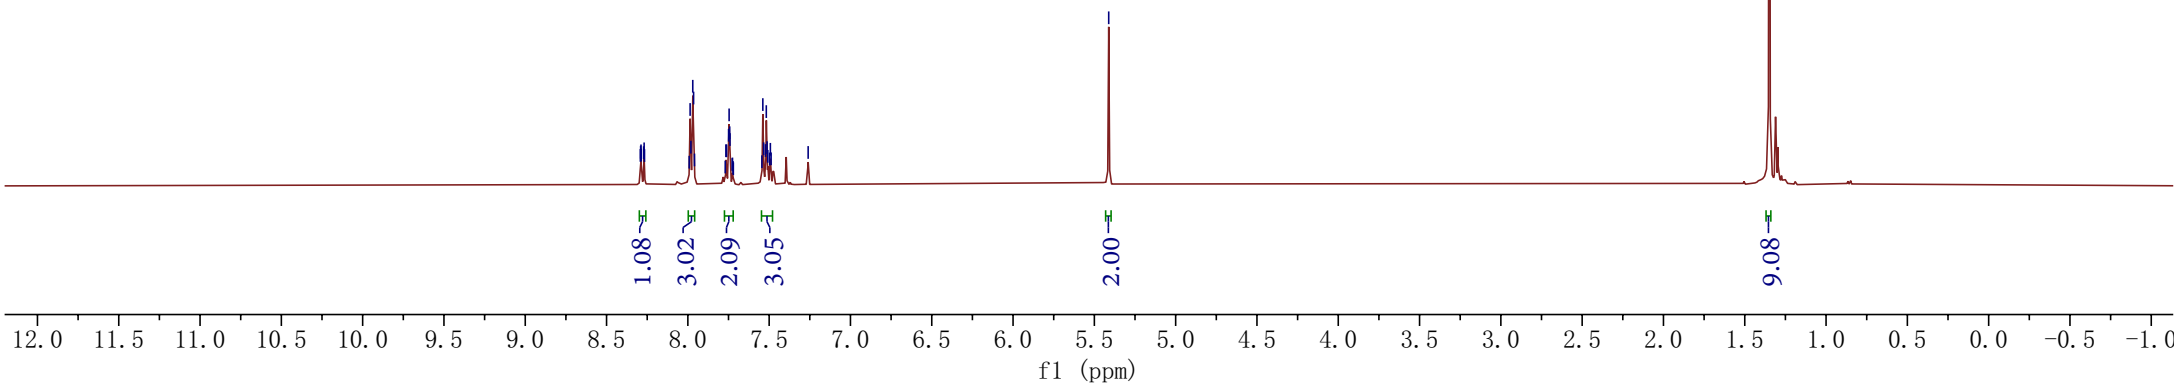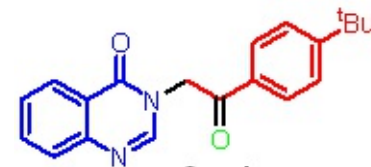

3ad

<sup>1</sup>H NMR (400 MHz, CDCl<sub>3</sub>)



—191.34

—161.13  
—158.44

—148.30  
—146.86

134.55  
131.95  
128.30  
127.69  
127.45  
126.95  
126.09  
122.06

77.48  
77.16  
76.84

—51.28

—35.42  
—31.13

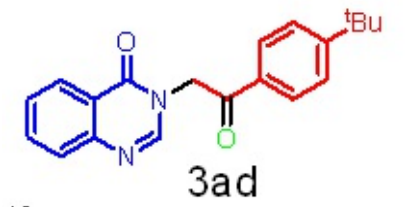

<sup>13</sup>C NMR (100 MHz, CDCl<sub>3</sub>)

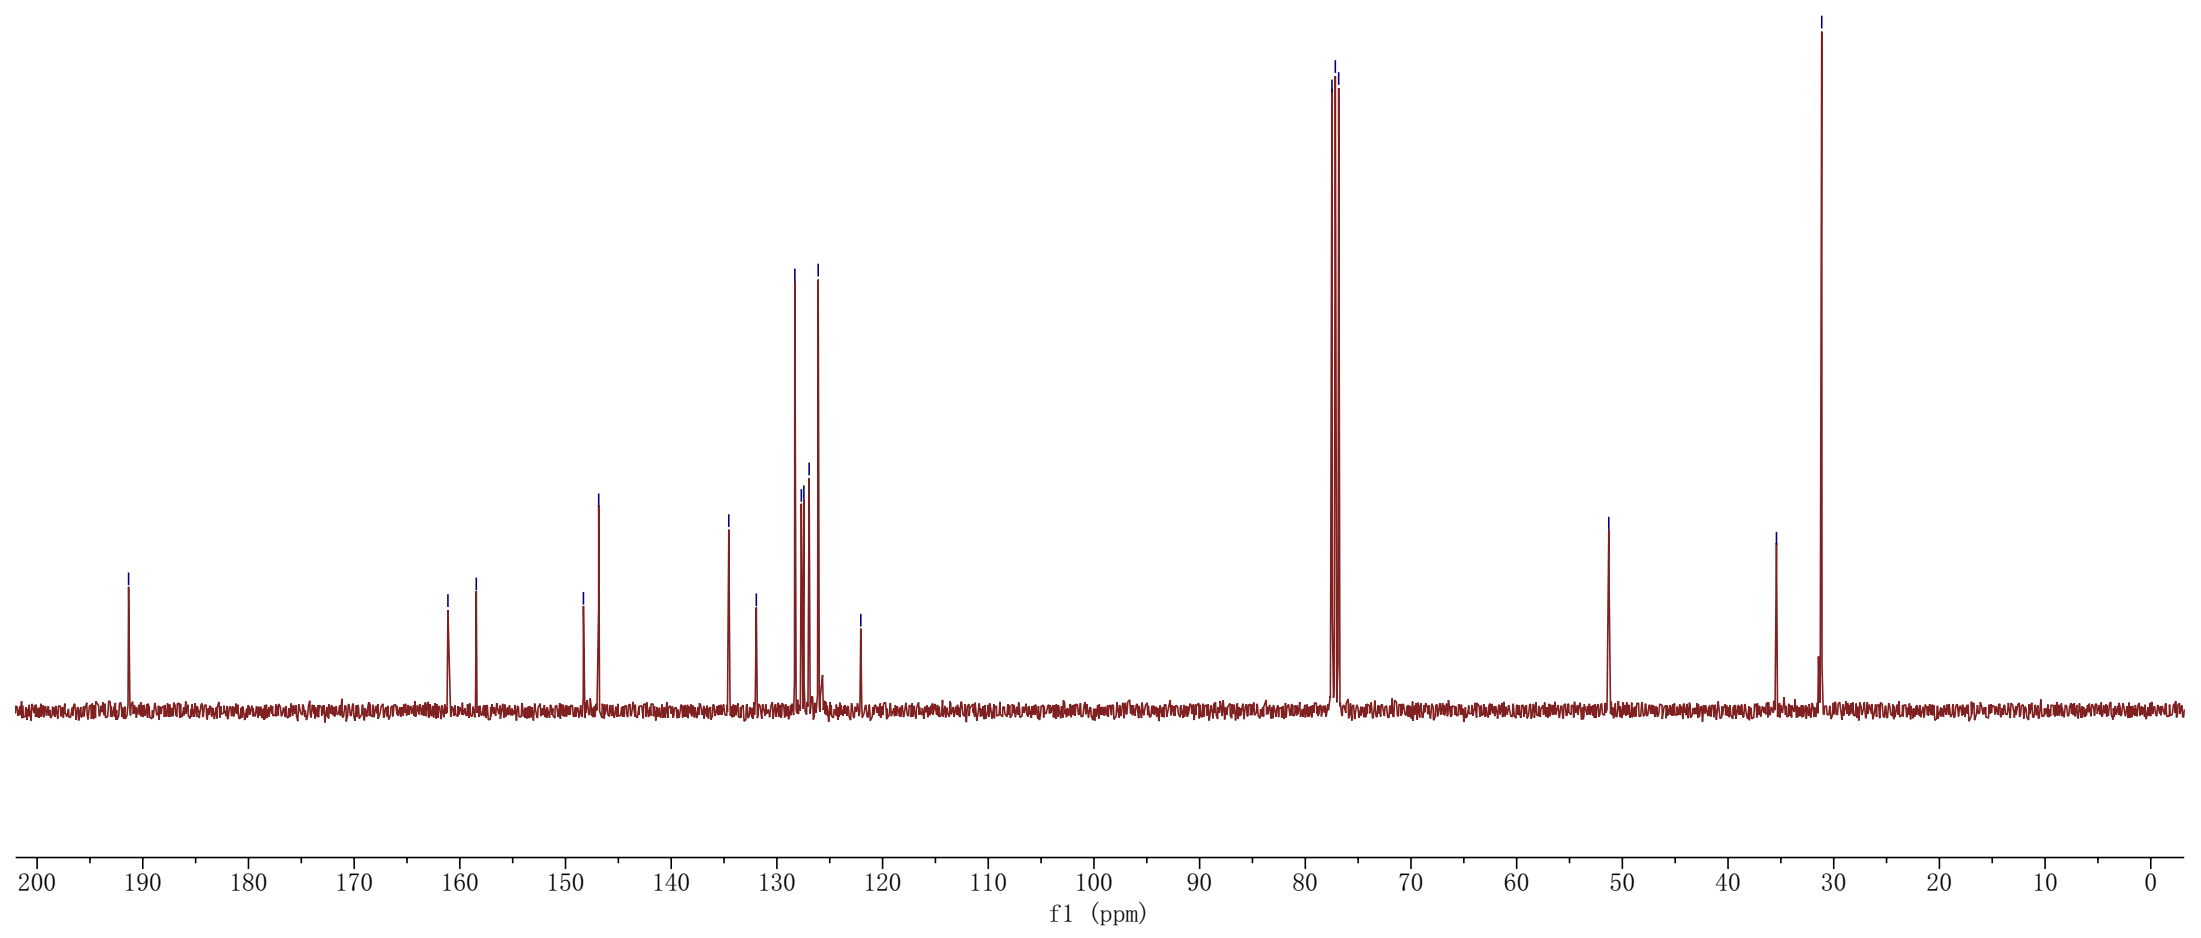

8.293  
8.289  
8.273  
8.271  
8.269  
7.973  
7.912  
7.907  
7.896  
7.891  
7.885  
7.791  
7.787  
7.774  
7.770  
7.763  
7.758  
7.742  
7.688  
7.682  
7.677  
7.666  
7.661  
7.536  
7.532  
7.519  
7.516  
7.512  
5.399

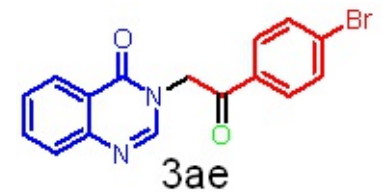

<sup>1</sup>H NMR (400 MHz, CDCl<sub>3</sub>)

8.293  
8.289  
8.273  
8.271  
8.269  
7.973  
7.912  
7.907  
7.896  
7.891  
7.791  
7.787  
7.774  
7.770  
7.763  
7.758  
7.682  
7.677  
7.666  
7.661  
7.519  
7.516  
7.512

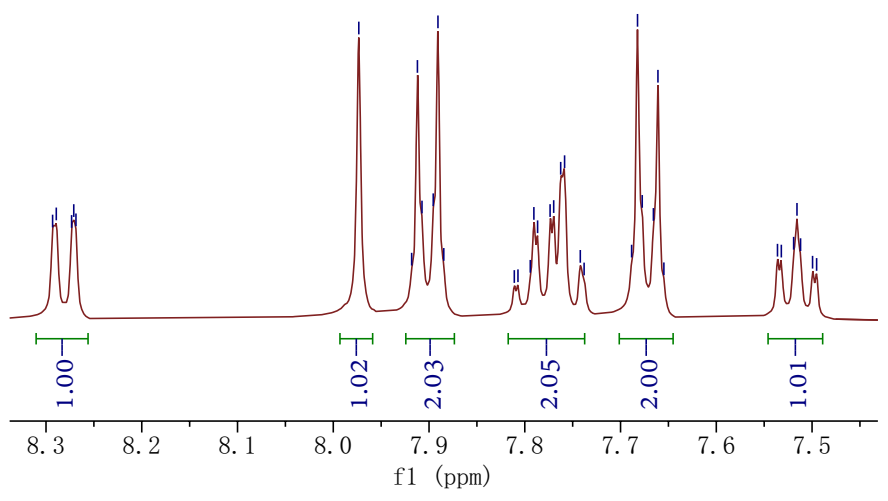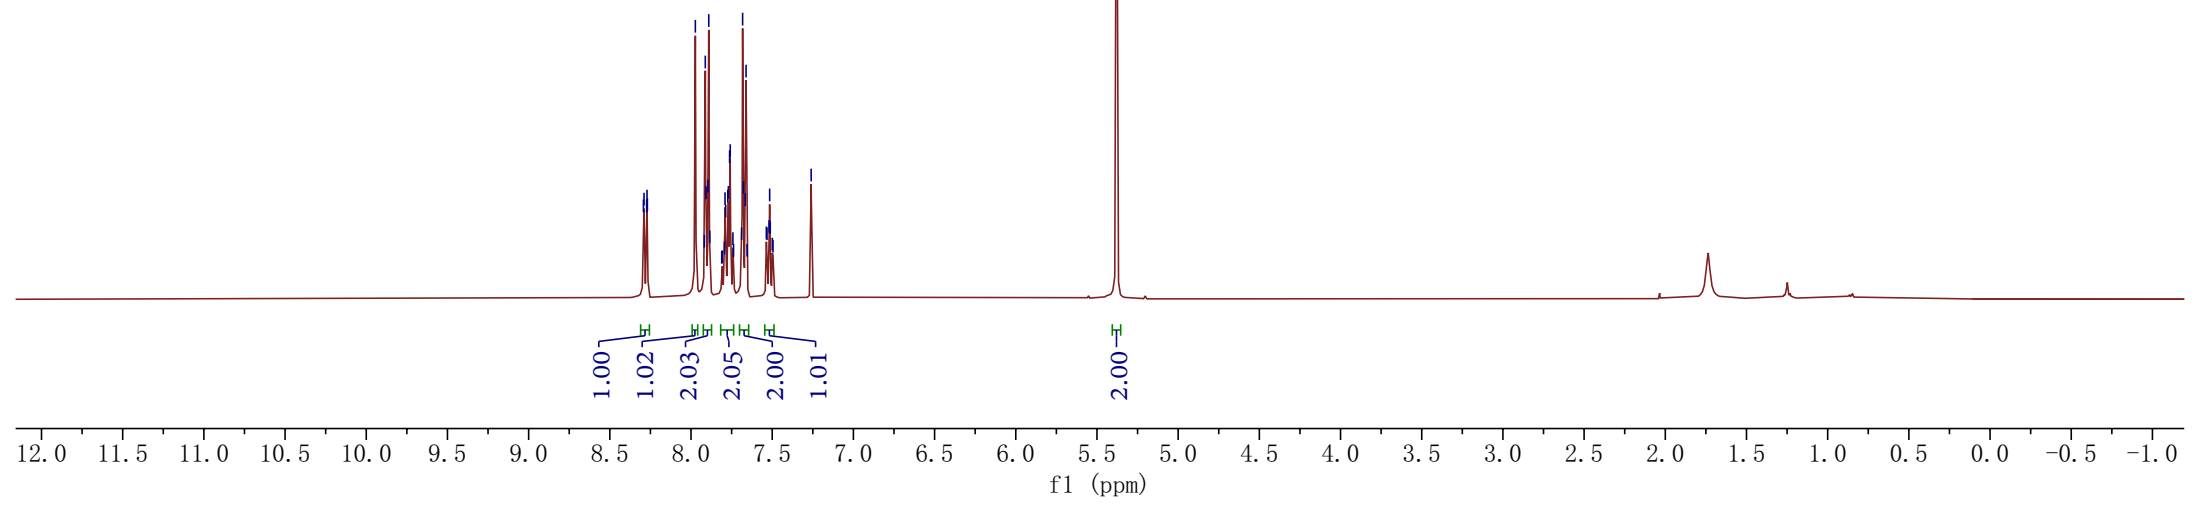

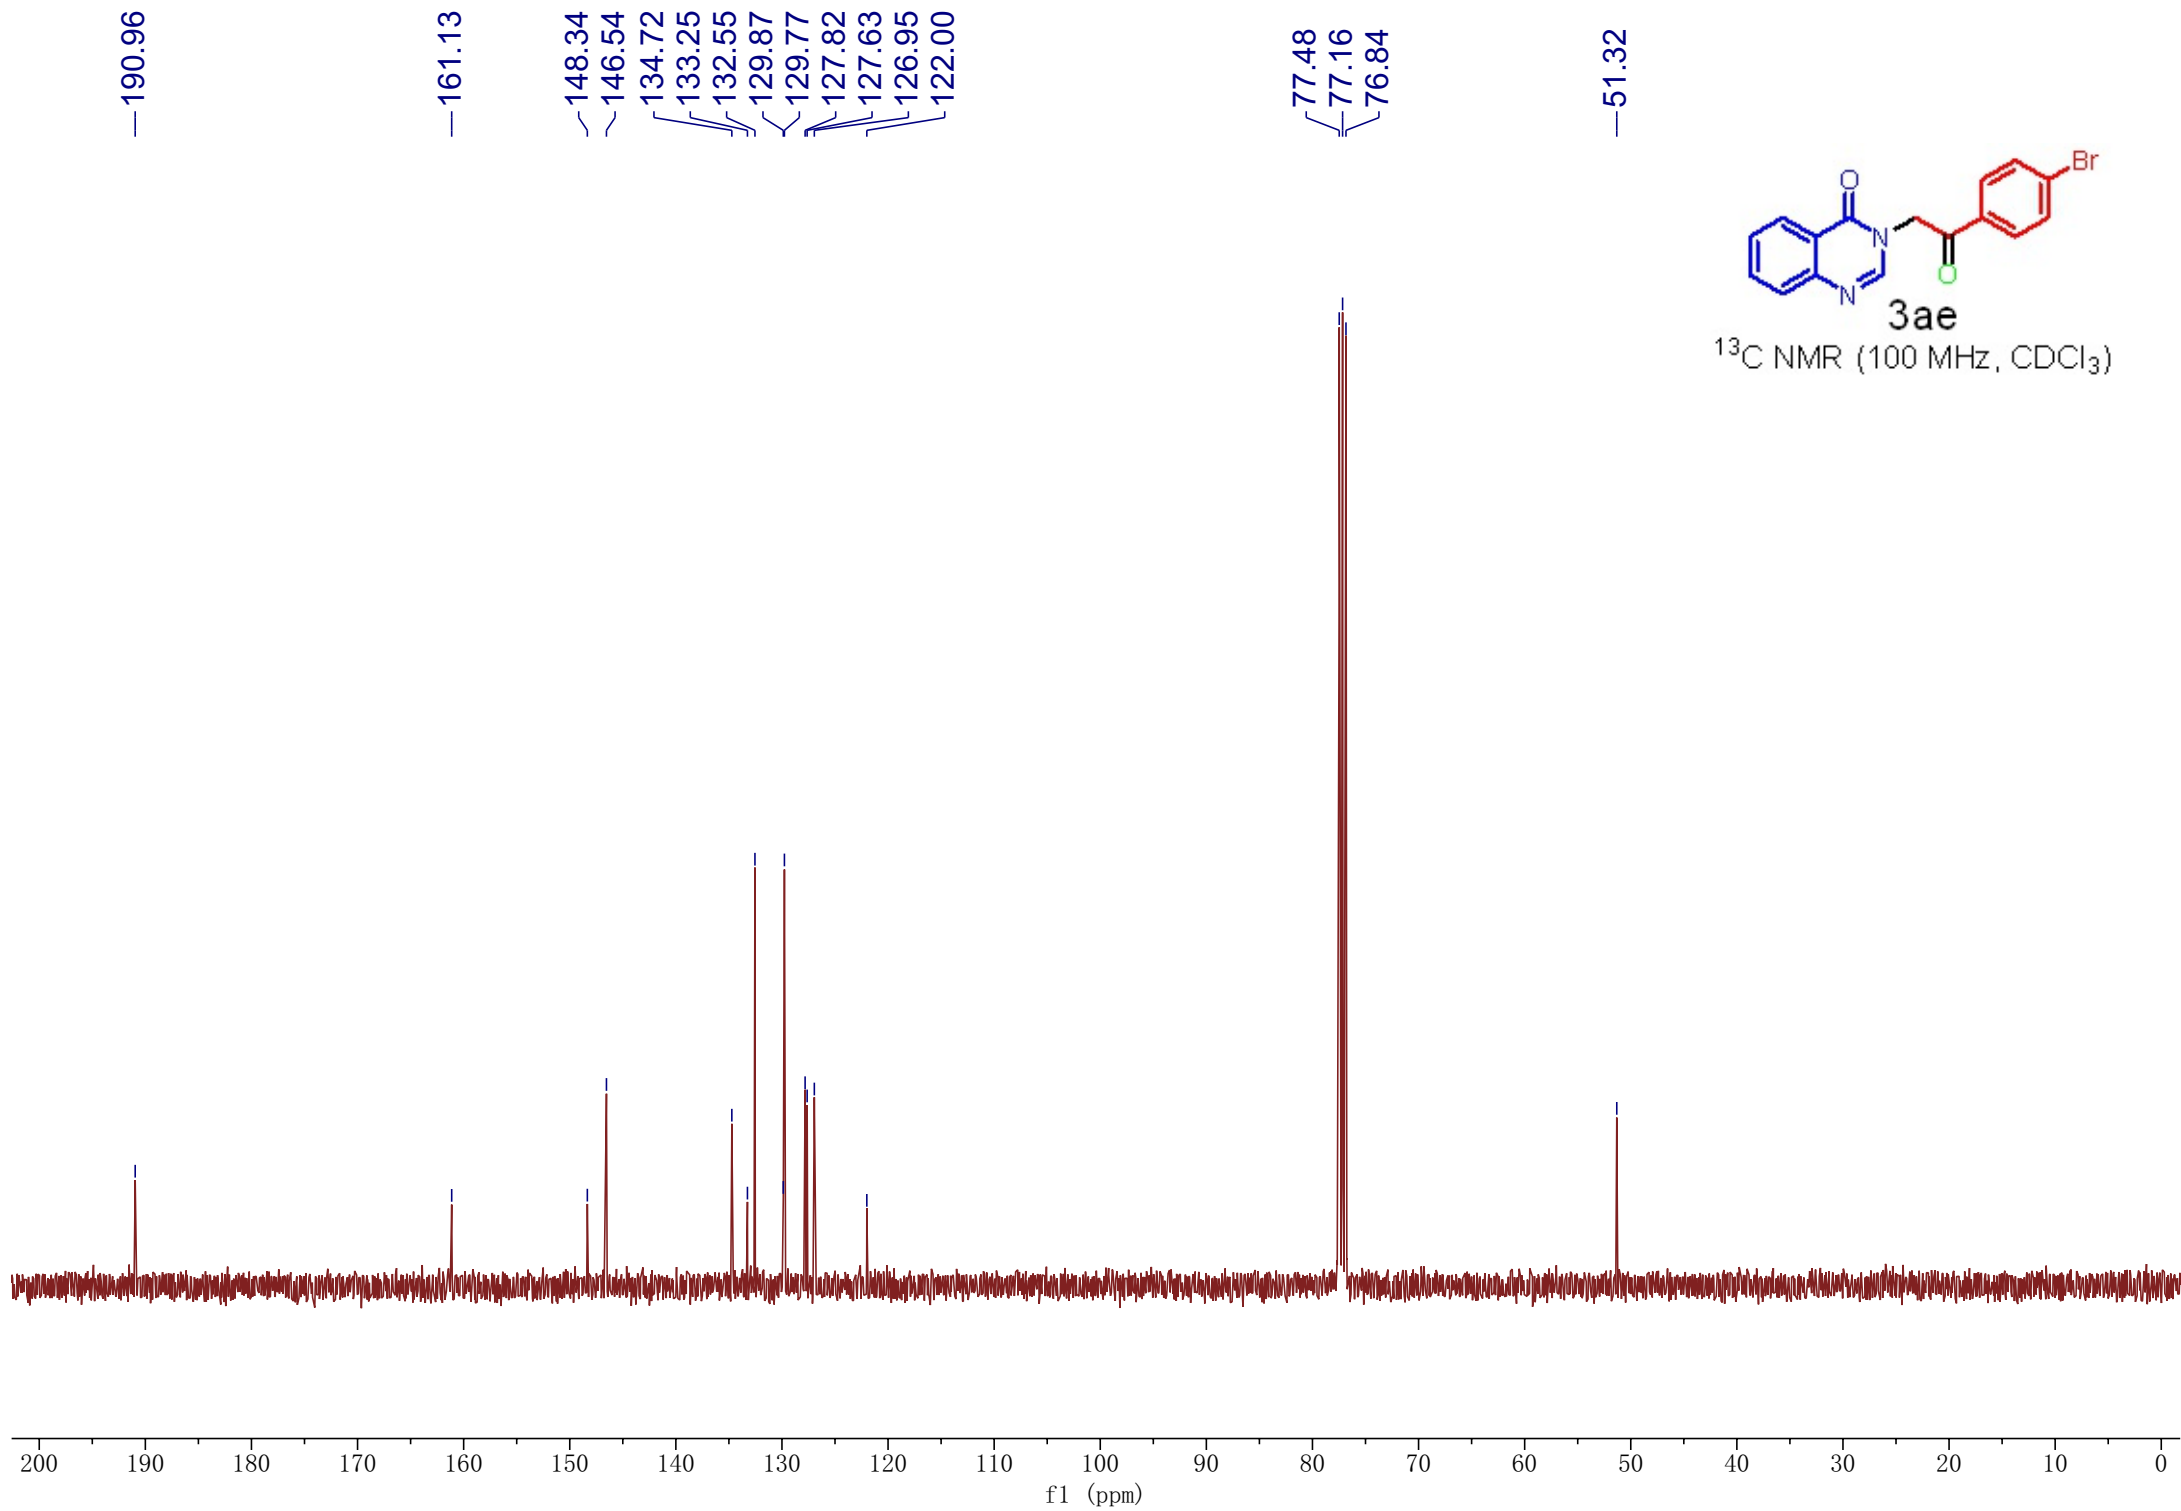

8.291  
8.287  
8.270  
8.266  
8.101  
8.093  
8.088  
8.080  
8.076  
8.071  
8.063  
8.058  
7.980  
7.971  
7.804  
7.800  
7.787  
7.783  
7.780  
7.766  
7.755  
7.751  
7.763  
7.766  
7.763  
7.755  
7.751  
7.510  
7.260  
7.219  
7.203  
7.198  
7.193  
7.530  
7.526  
7.513  
7.510  
7.506  
7.493  
7.489  
7.260  
7.227  
7.219  
7.214  
7.206  
7.203  
7.198  
7.193  
7.190  
7.182  
7.176  
5.389

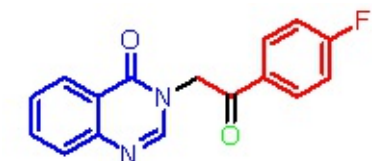

3af

<sup>1</sup>H NMR (400 MHz, CDCl<sub>3</sub>)

8.291  
8.287  
8.270  
8.266  
8.093  
8.080  
8.076  
8.071  
8.063  
8.058  
7.971  
7.783  
7.780  
7.766  
7.763  
7.755  
7.751  
7.510  
7.260  
7.219  
7.203  
7.198  
7.193  
7.176

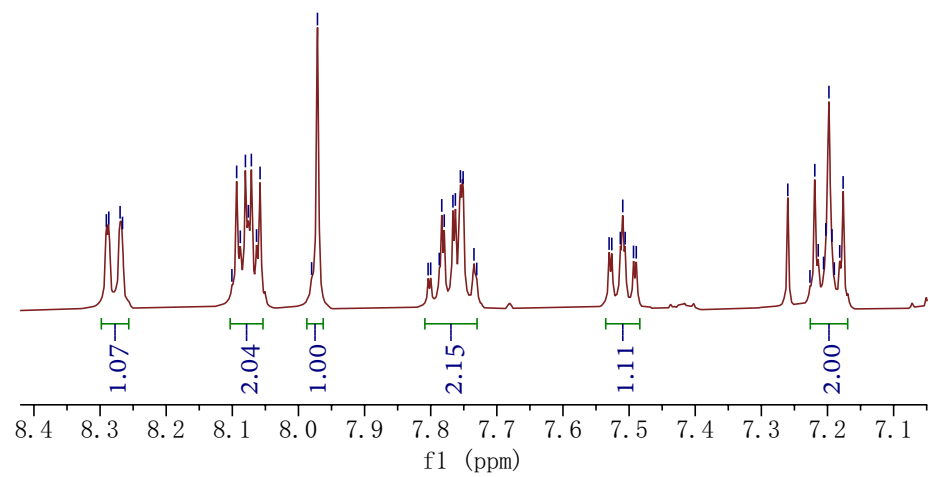

1.07  
2.04  
1.00  
2.15  
1.11  
2.00  
2.00

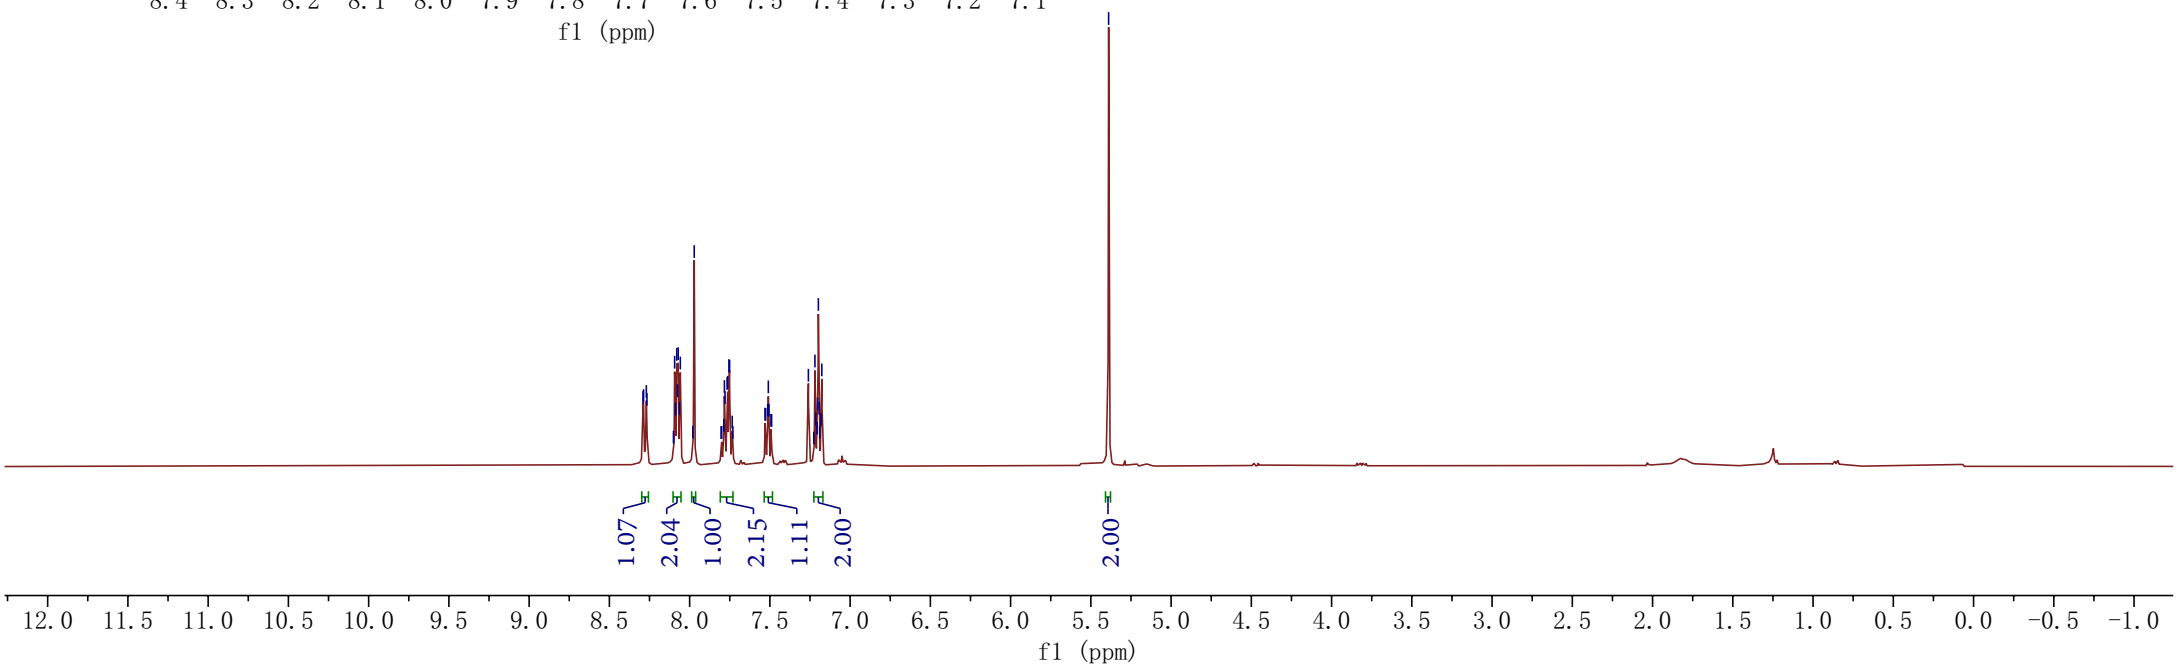

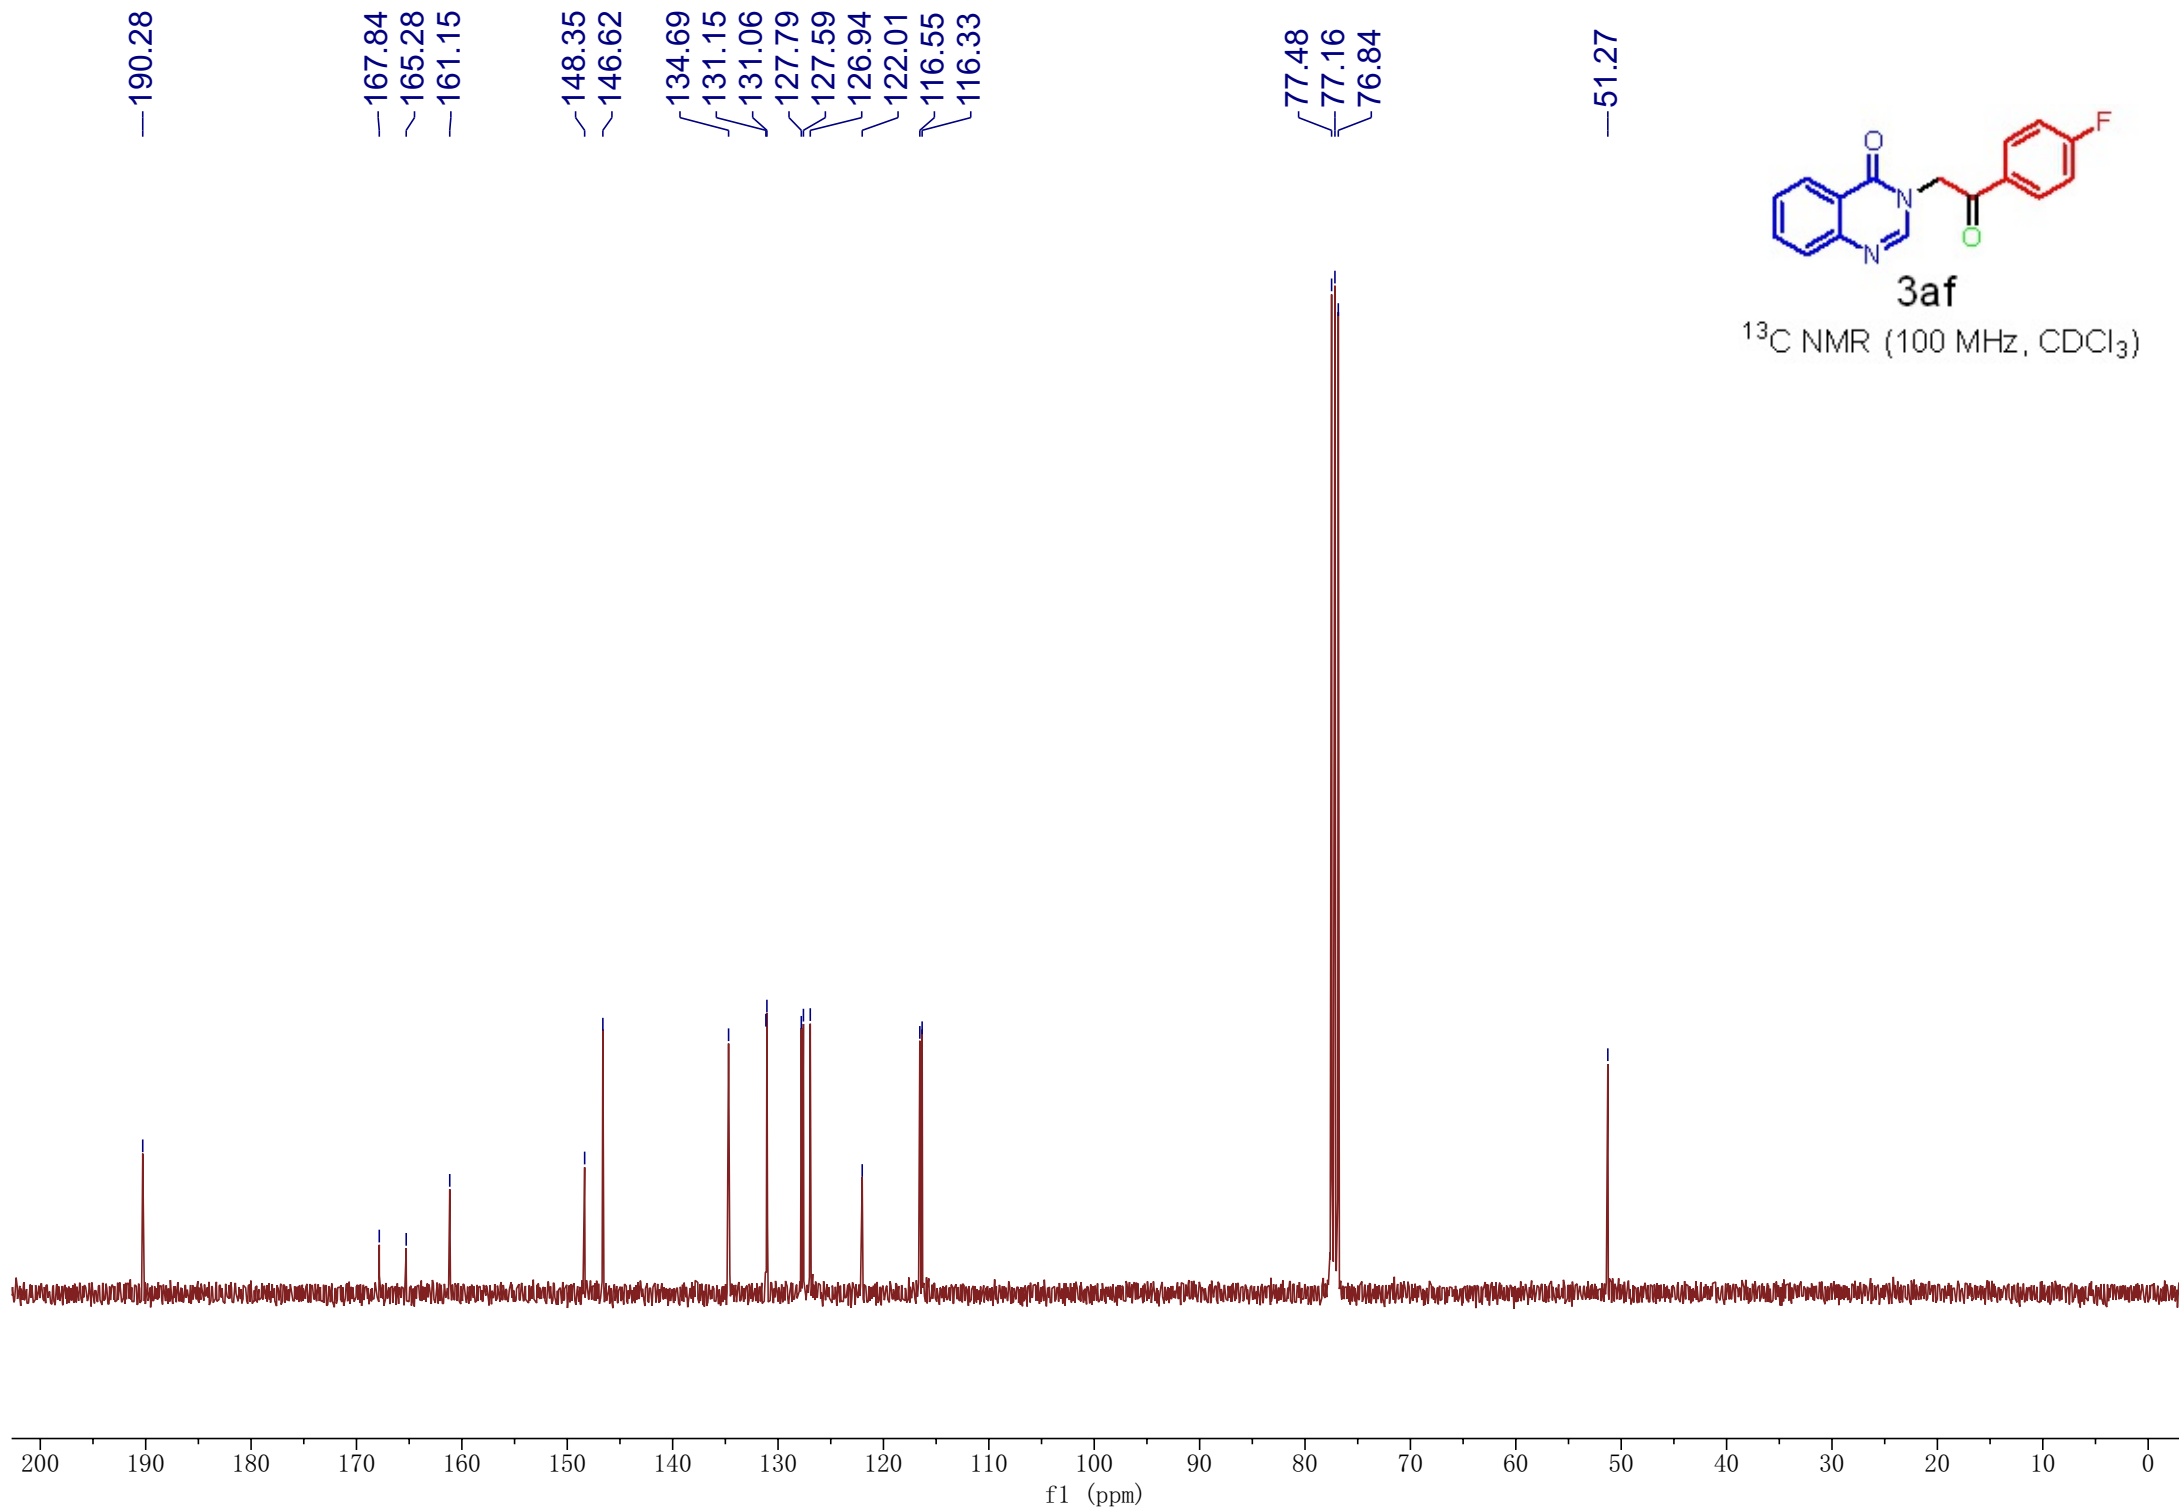

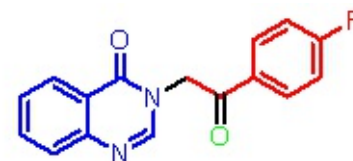

3af

$^{19}\text{F}$  NMR (376 MHz,  $\text{CDCl}_3$ )

--102.423

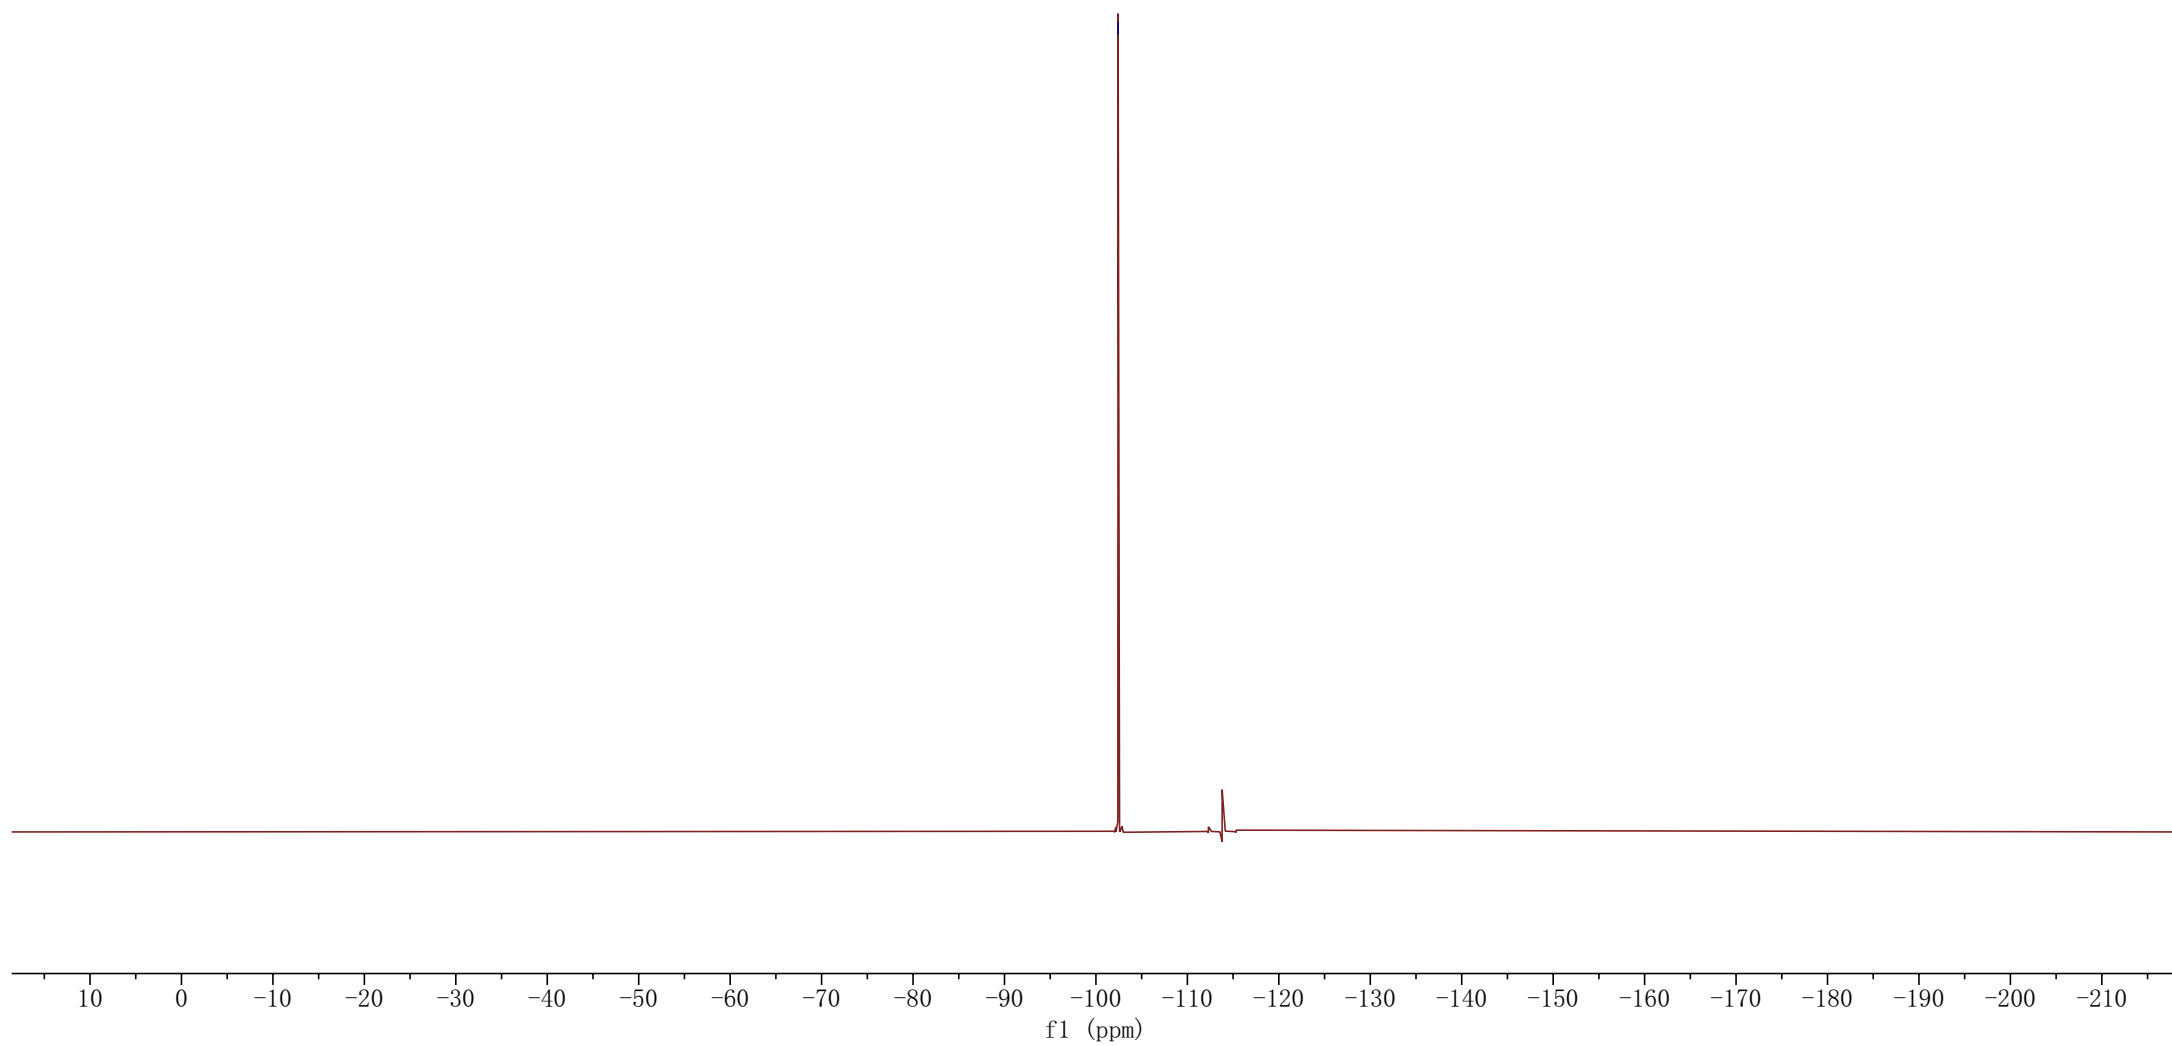

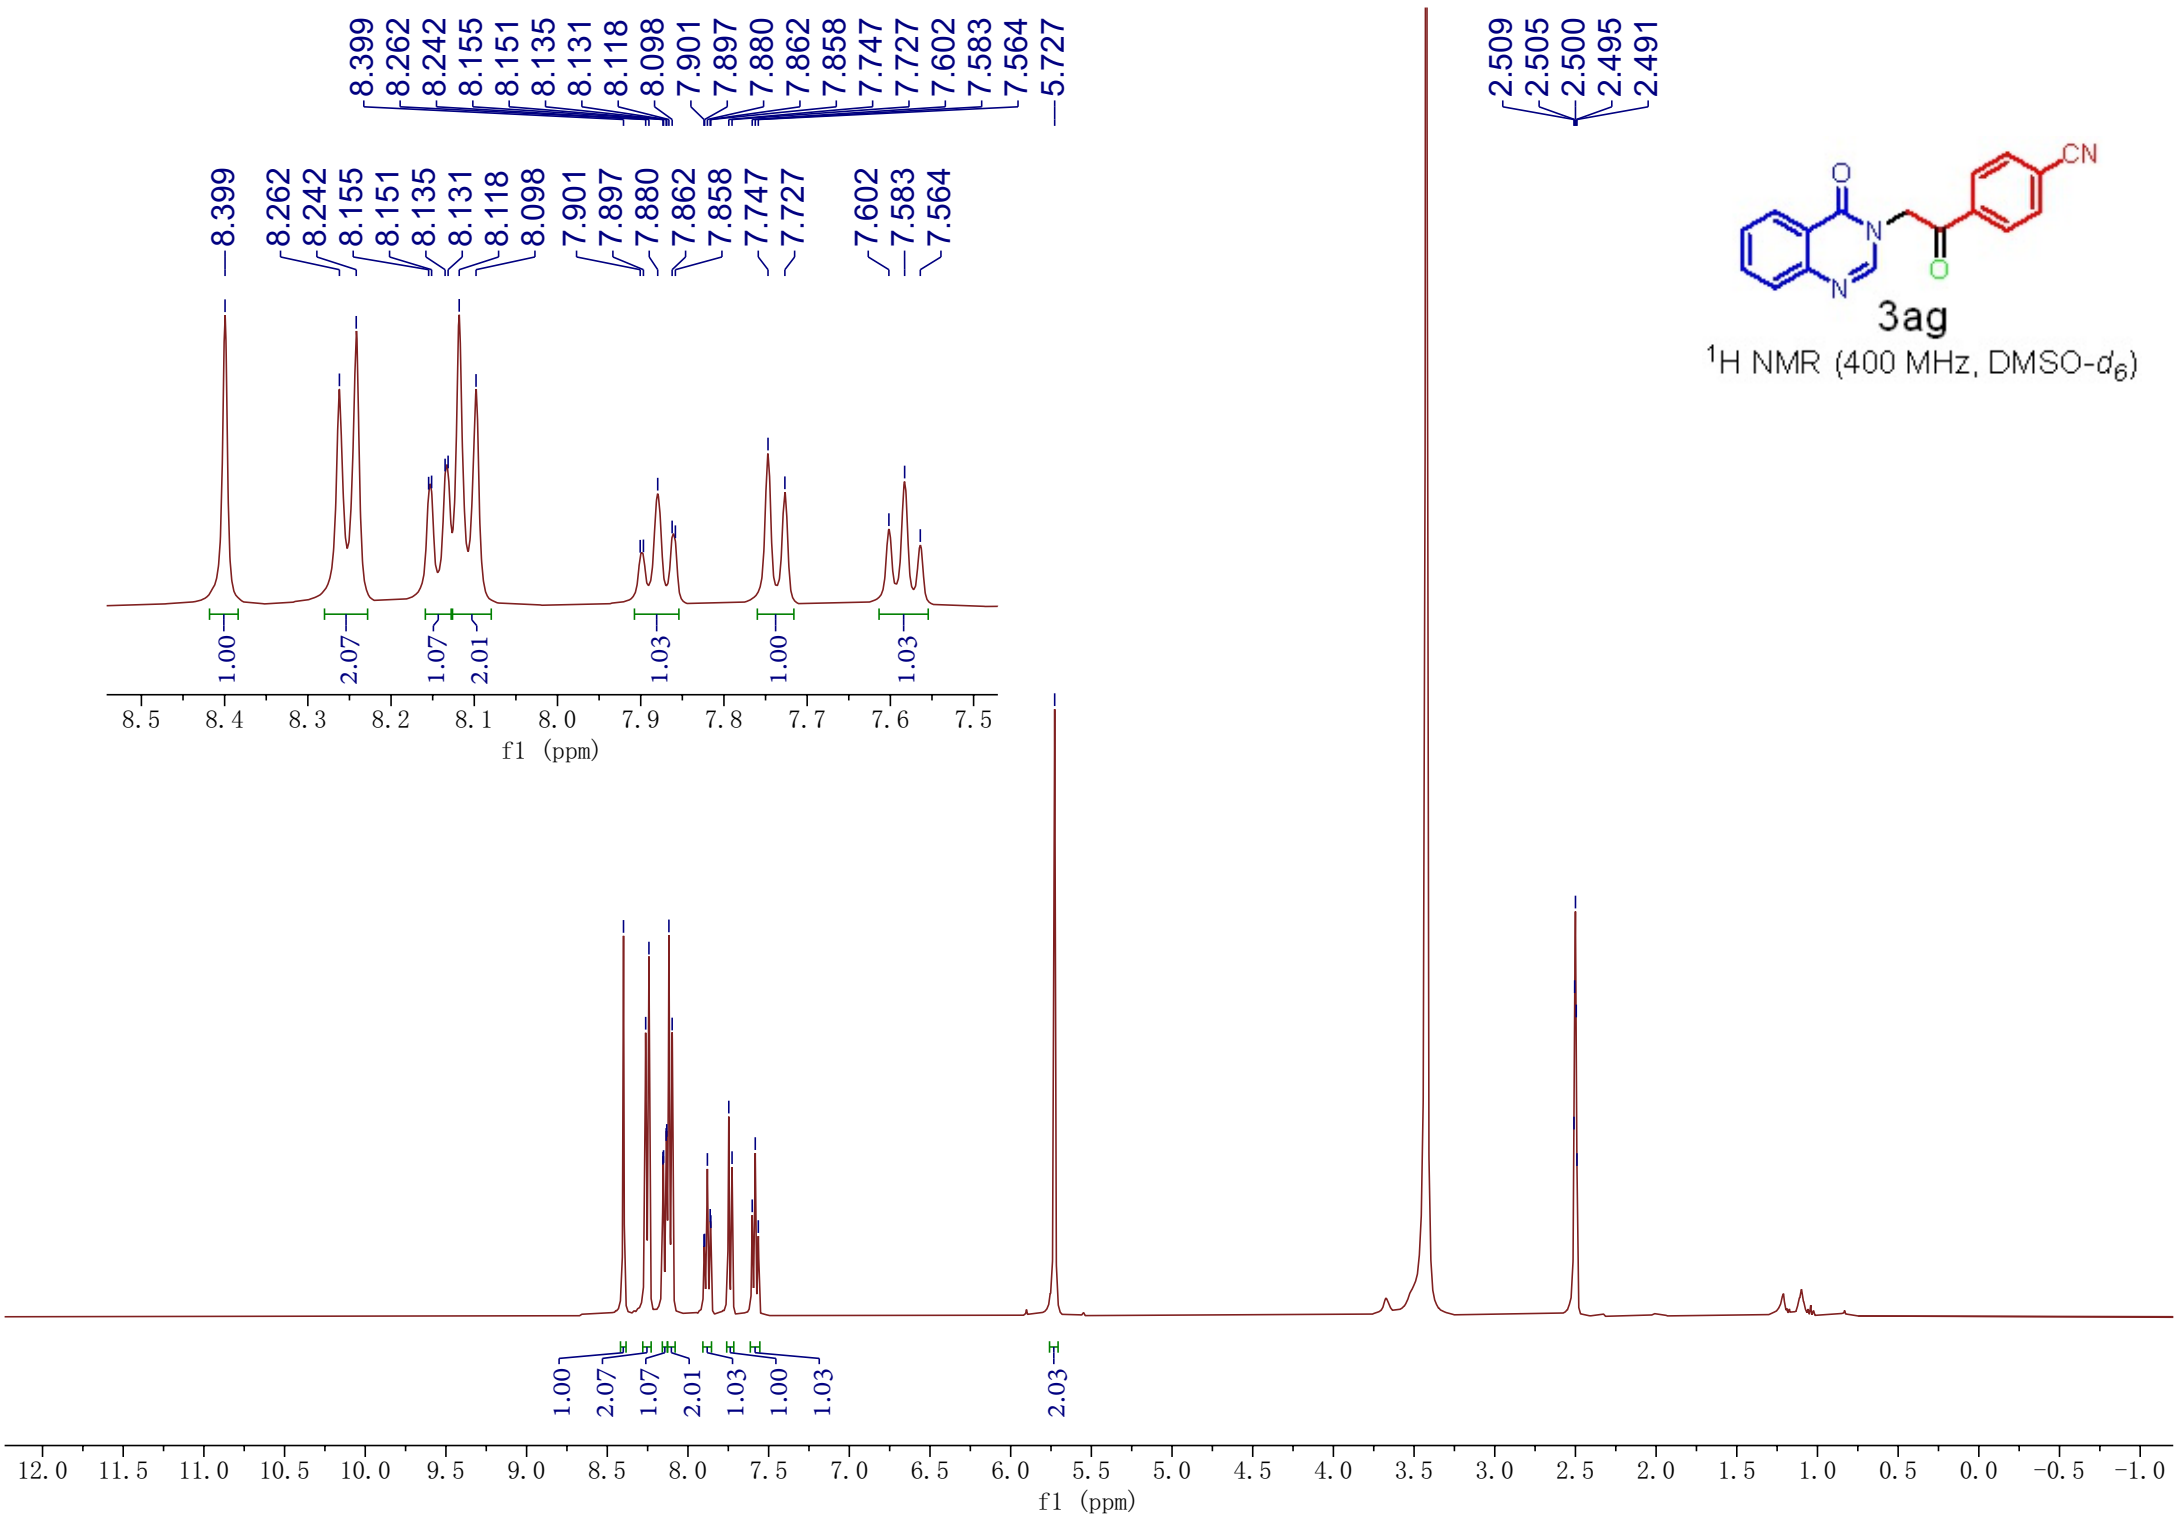

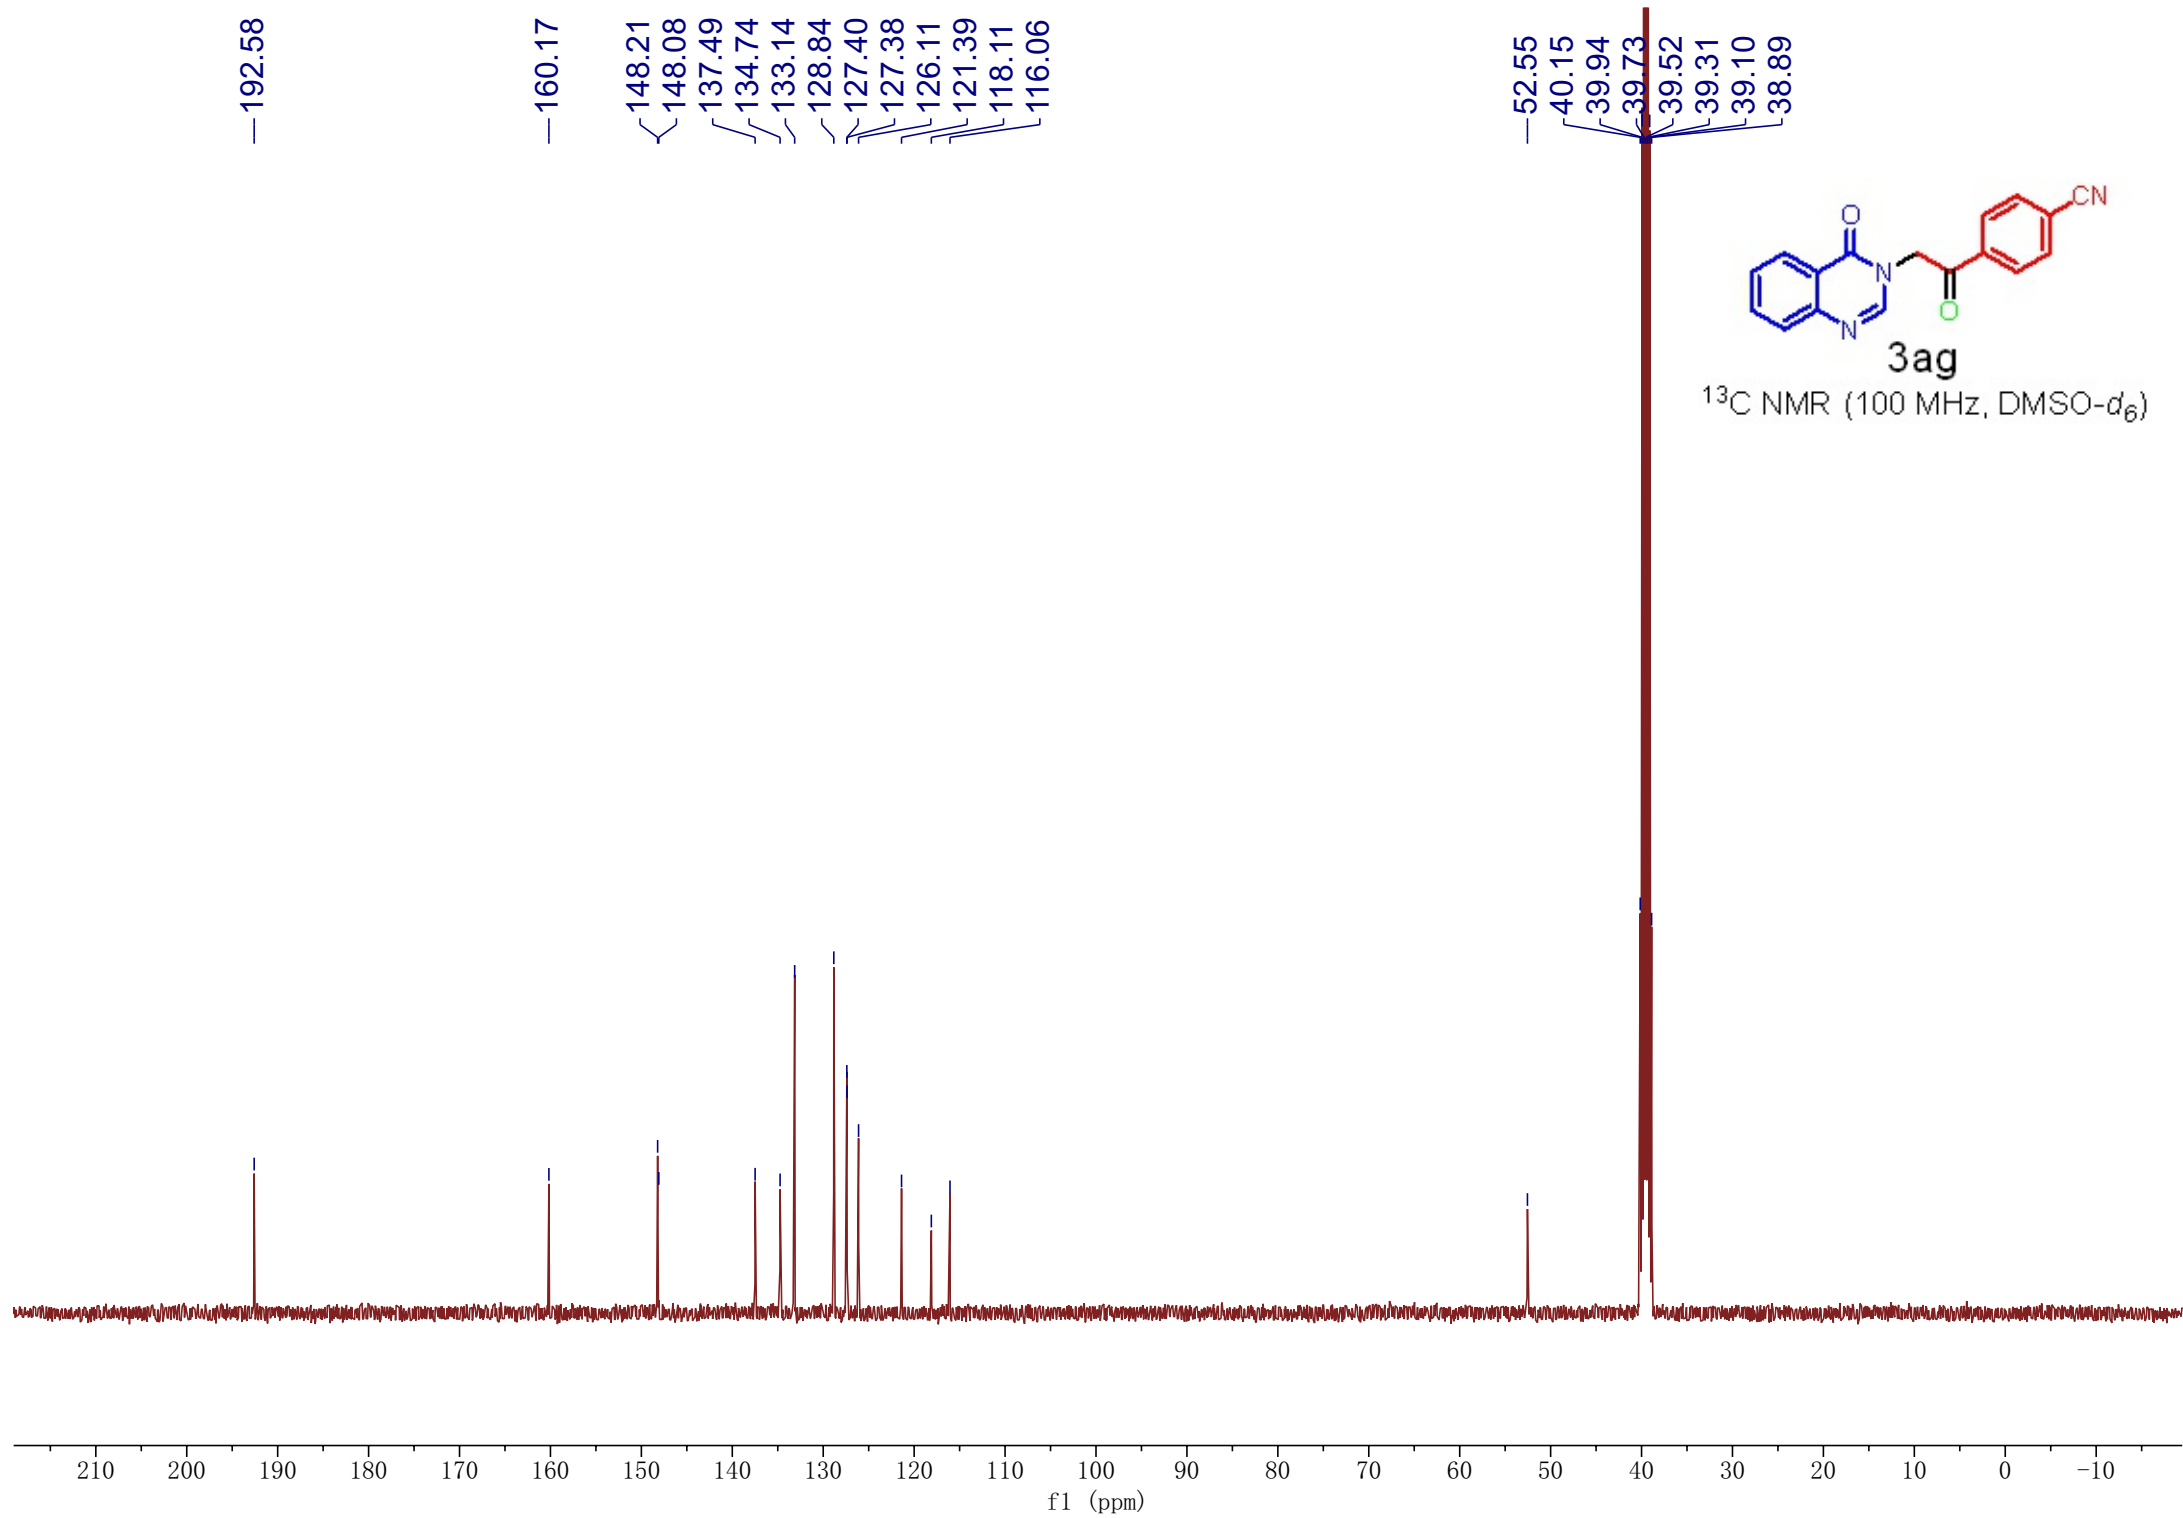



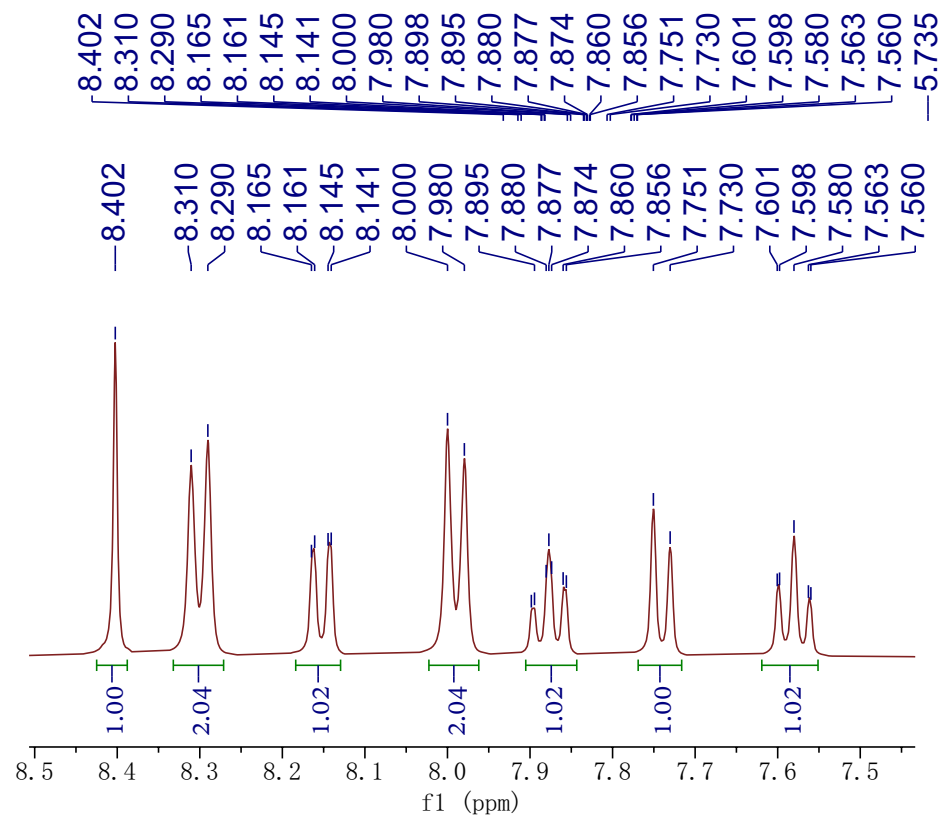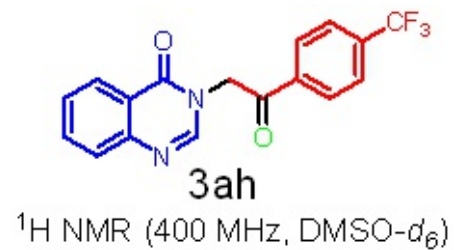

2.510  
2.505  
2.500  
2.495  
2.491

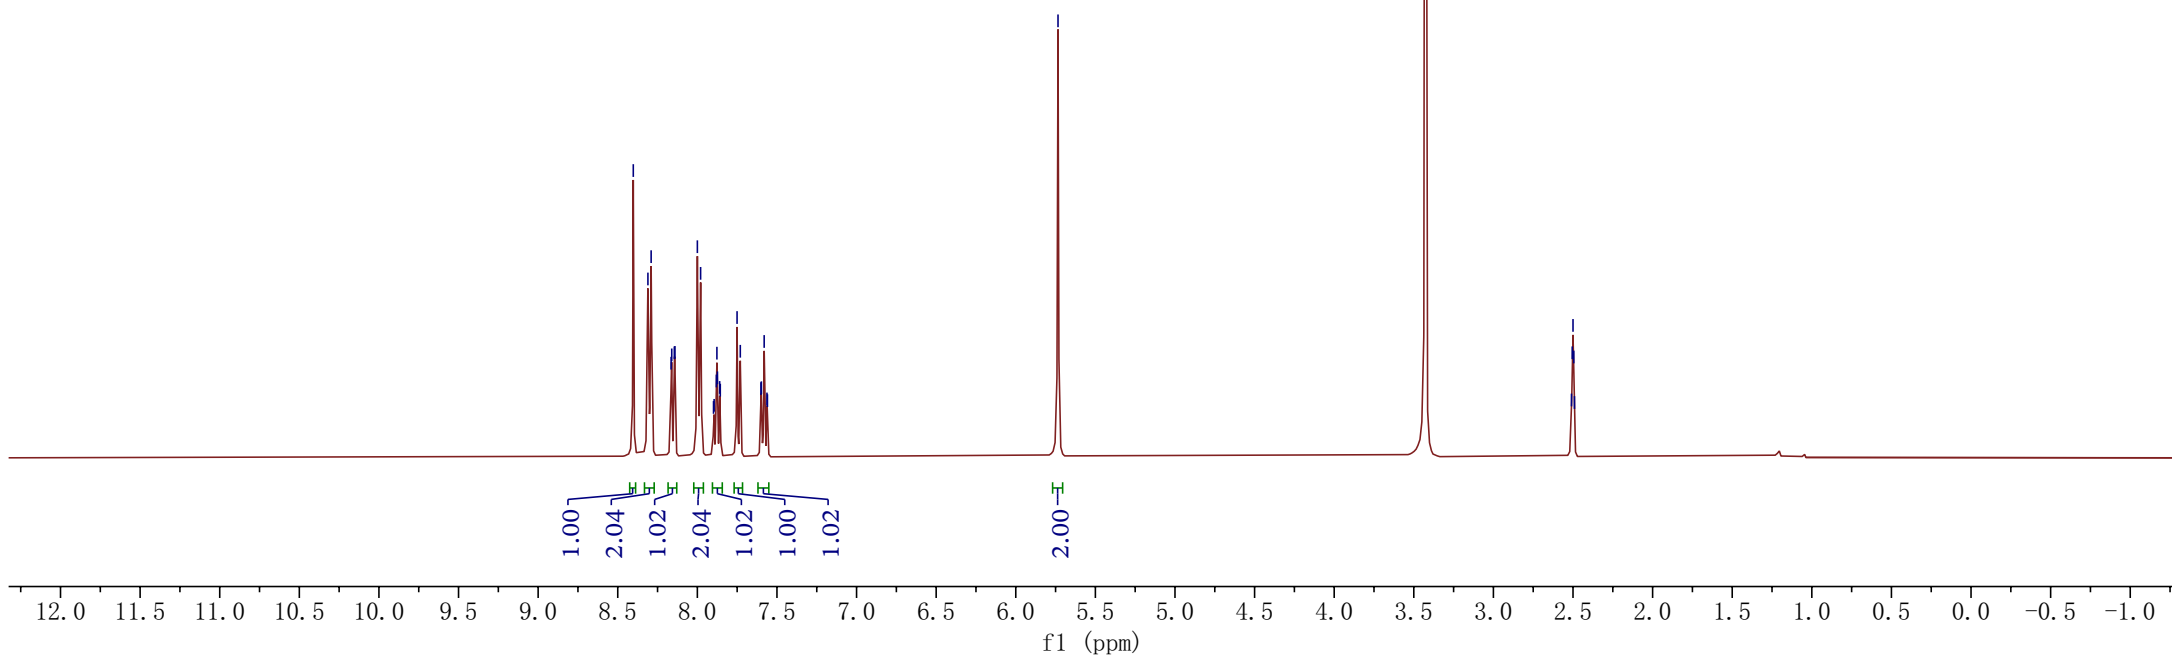

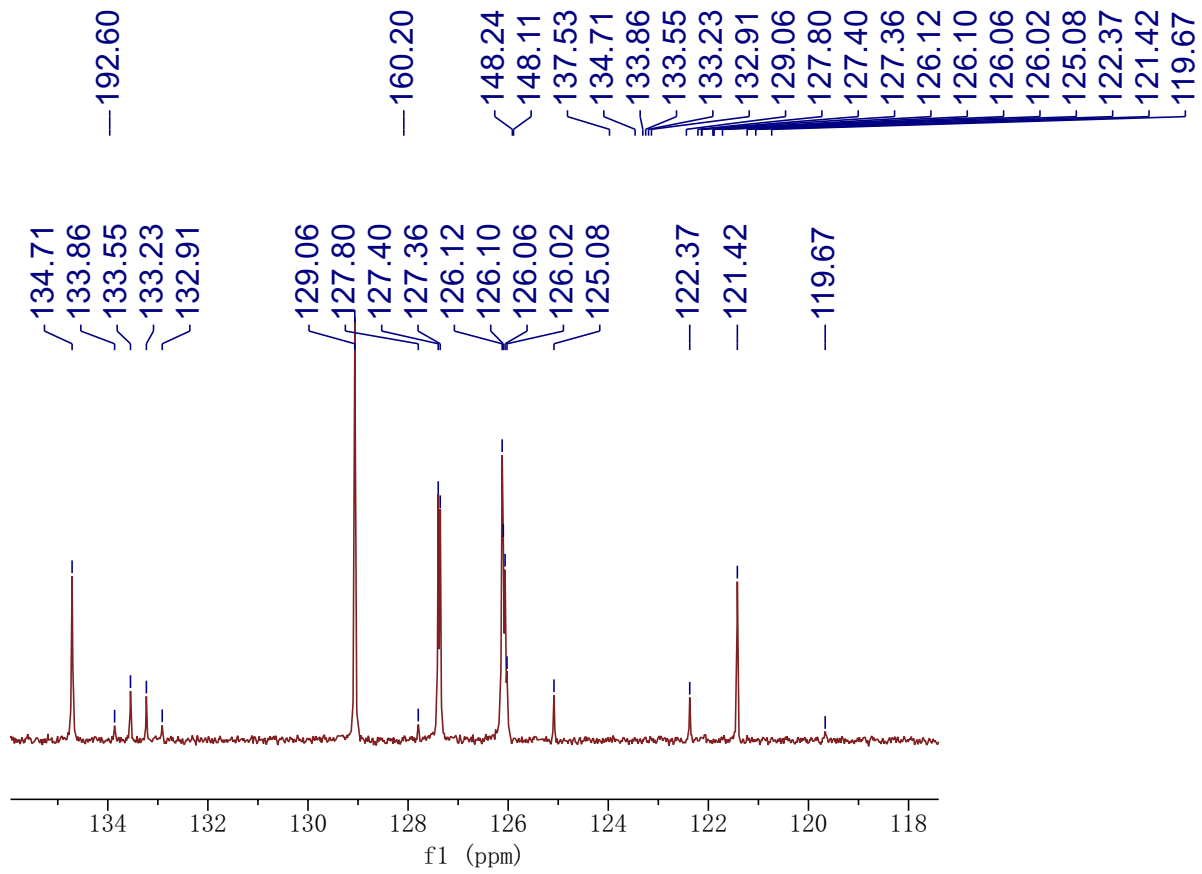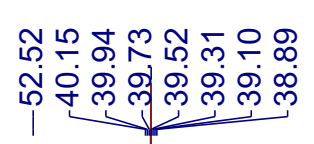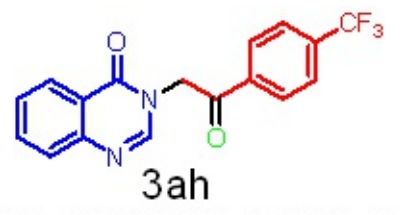

<sup>13</sup>C NMR (100 MHz, DMSO-*d*<sub>6</sub>)

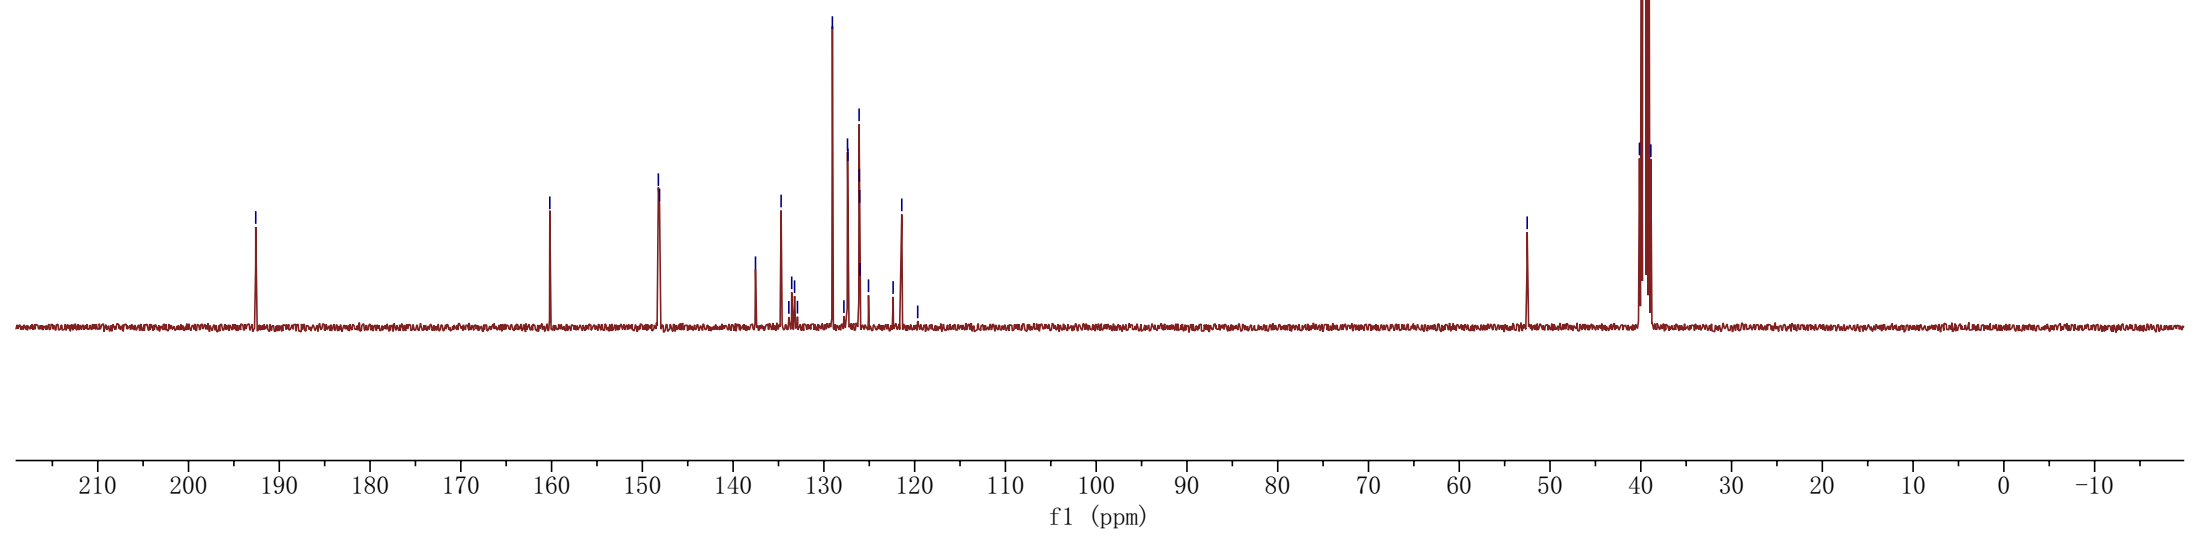

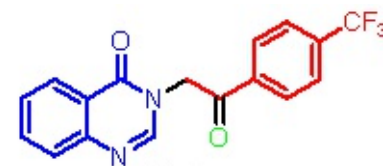

**3ah**

$^{19}\text{F}$  NMR (376 MHz,  $\text{DMSO-}d_6$ )

--61.697

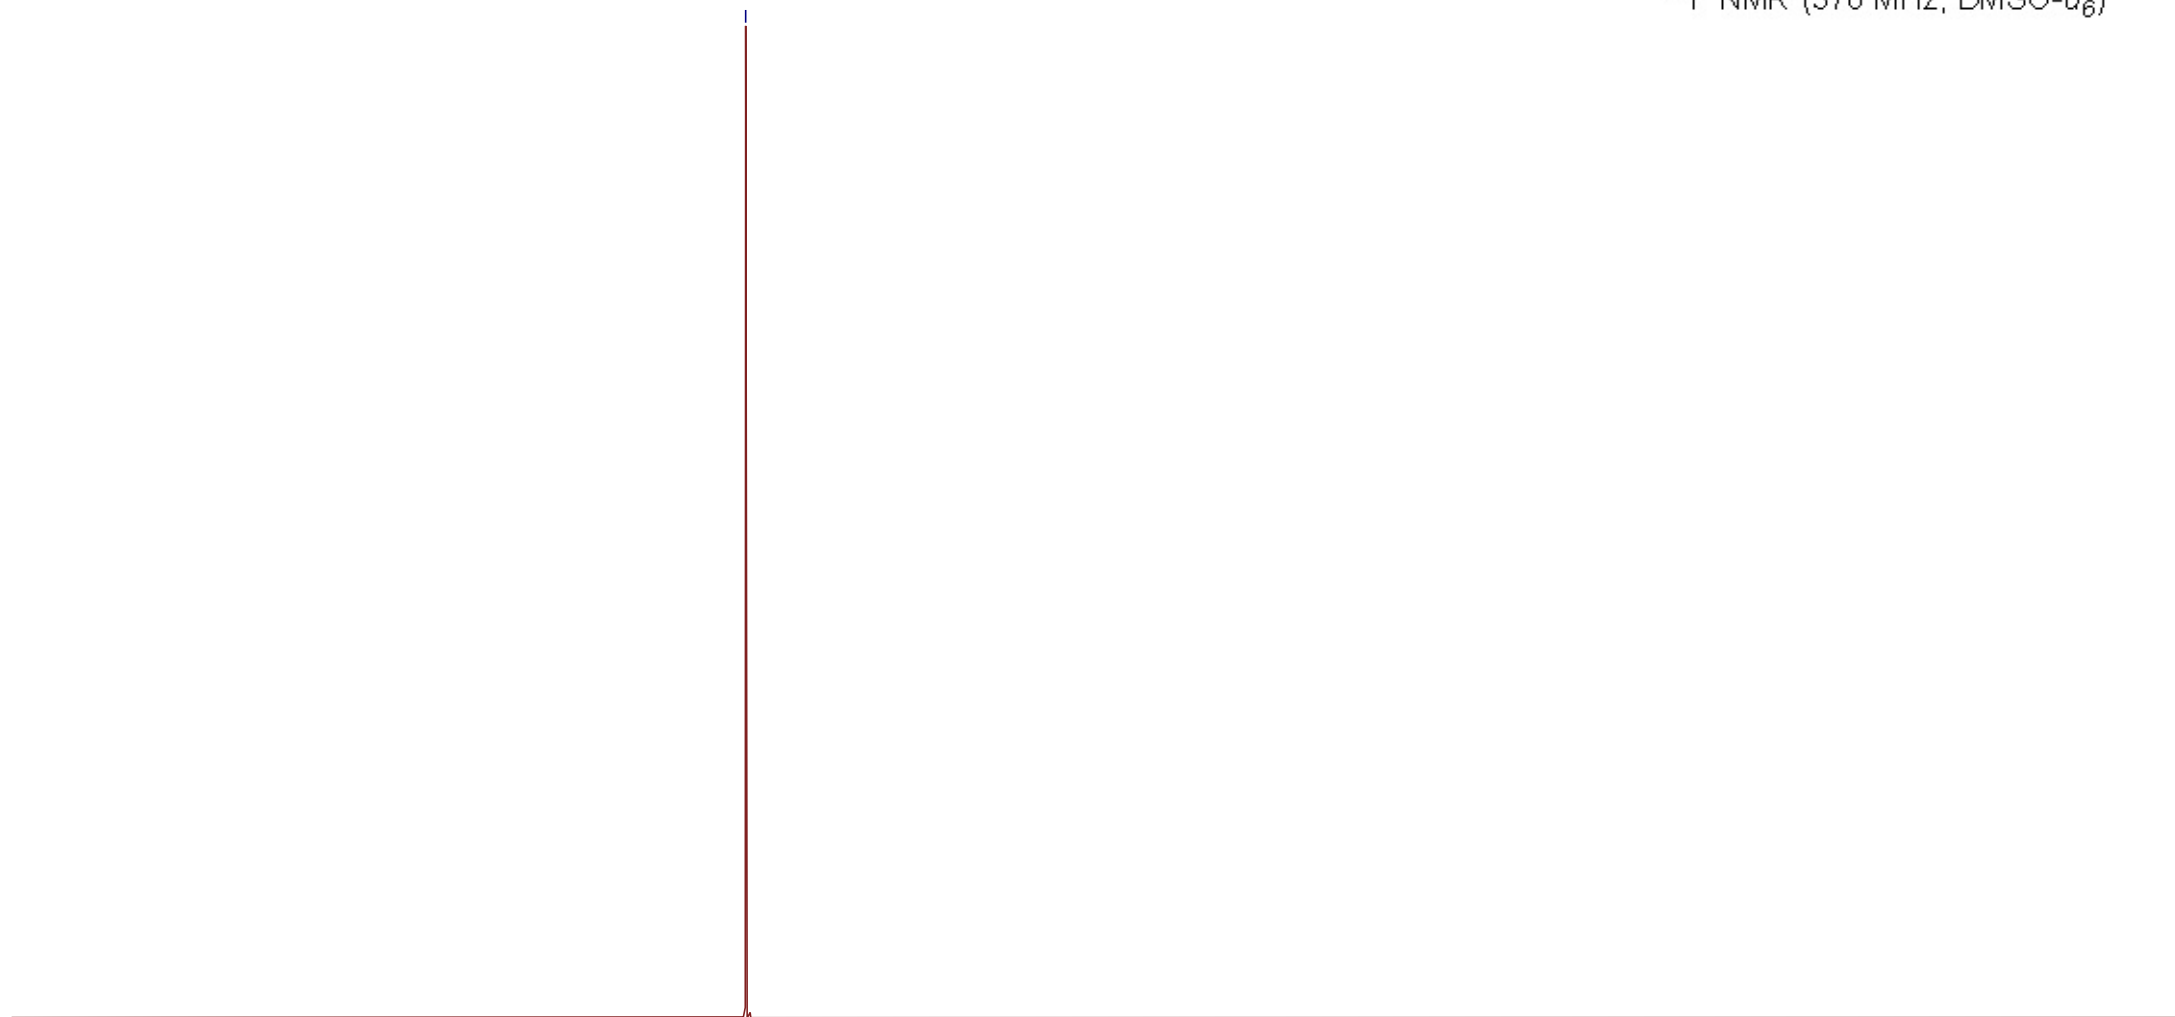

f1 (ppm)

8.300  
8.296  
8.280  
8.277  
8.275  
7.968  
7.781  
7.778  
7.765  
7.761  
7.757  
7.753  
7.637  
7.634  
7.631  
7.617  
7.614  
7.611  
7.533  
7.528  
7.524  
7.512  
7.508  
7.504  
7.450  
7.430  
7.410  
7.260  
7.198  
7.196  
7.192  
7.189  
7.178  
7.175  
7.171  
5.419  
3.852

8.300  
8.296  
8.280  
8.277  
8.275  
7.968  
7.781  
7.778  
7.765  
7.761  
7.757  
7.753  
7.634  
7.631  
7.617  
7.614  
7.611  
7.533  
7.528  
7.524  
7.508  
7.450  
7.430  
7.410  
7.260  
7.196  
7.192

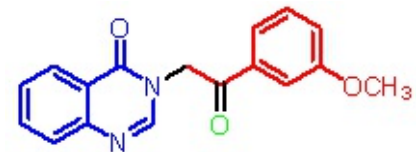

3ai

<sup>1</sup>H NMR (400 MHz, CDCl<sub>3</sub>)

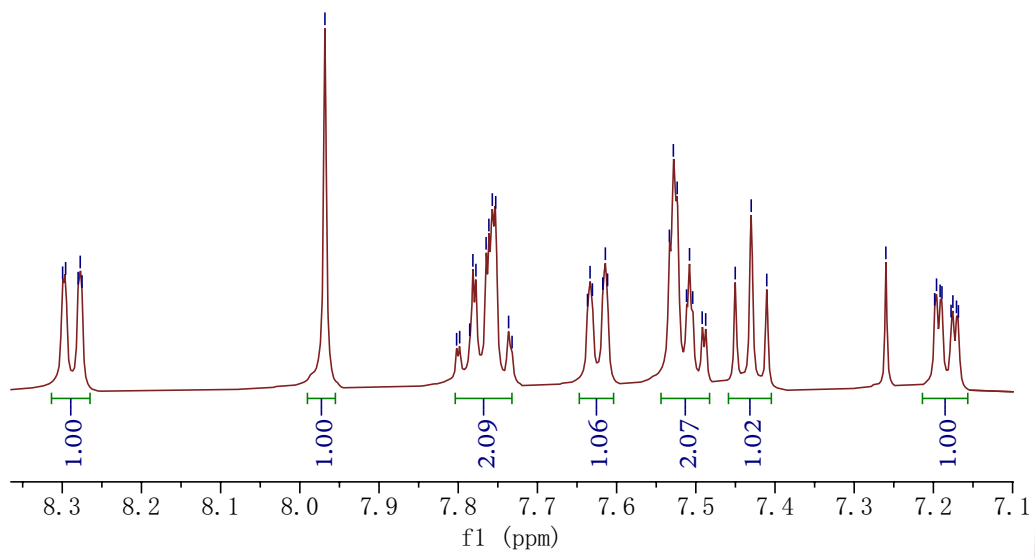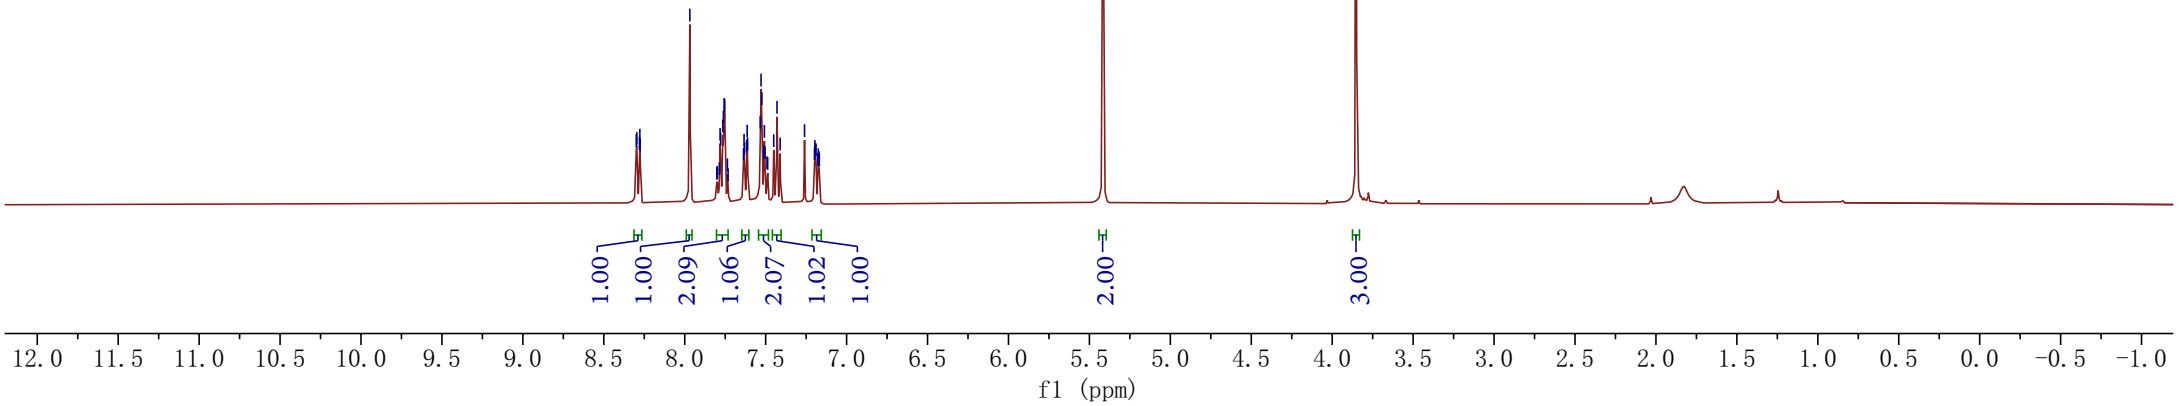

—191.61

161.15

160.18

148.33

146.72

135.76

134.63

130.15

127.75

127.53

126.95

122.05

121.03

120.76

—112.52

77.48

77.16

76.84

—55.65

—51.57

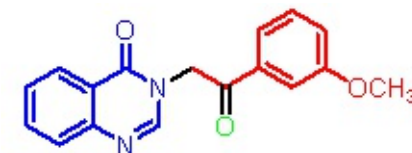

3ai

<sup>13</sup>C NMR (100 MHz, CDCl<sub>3</sub>)

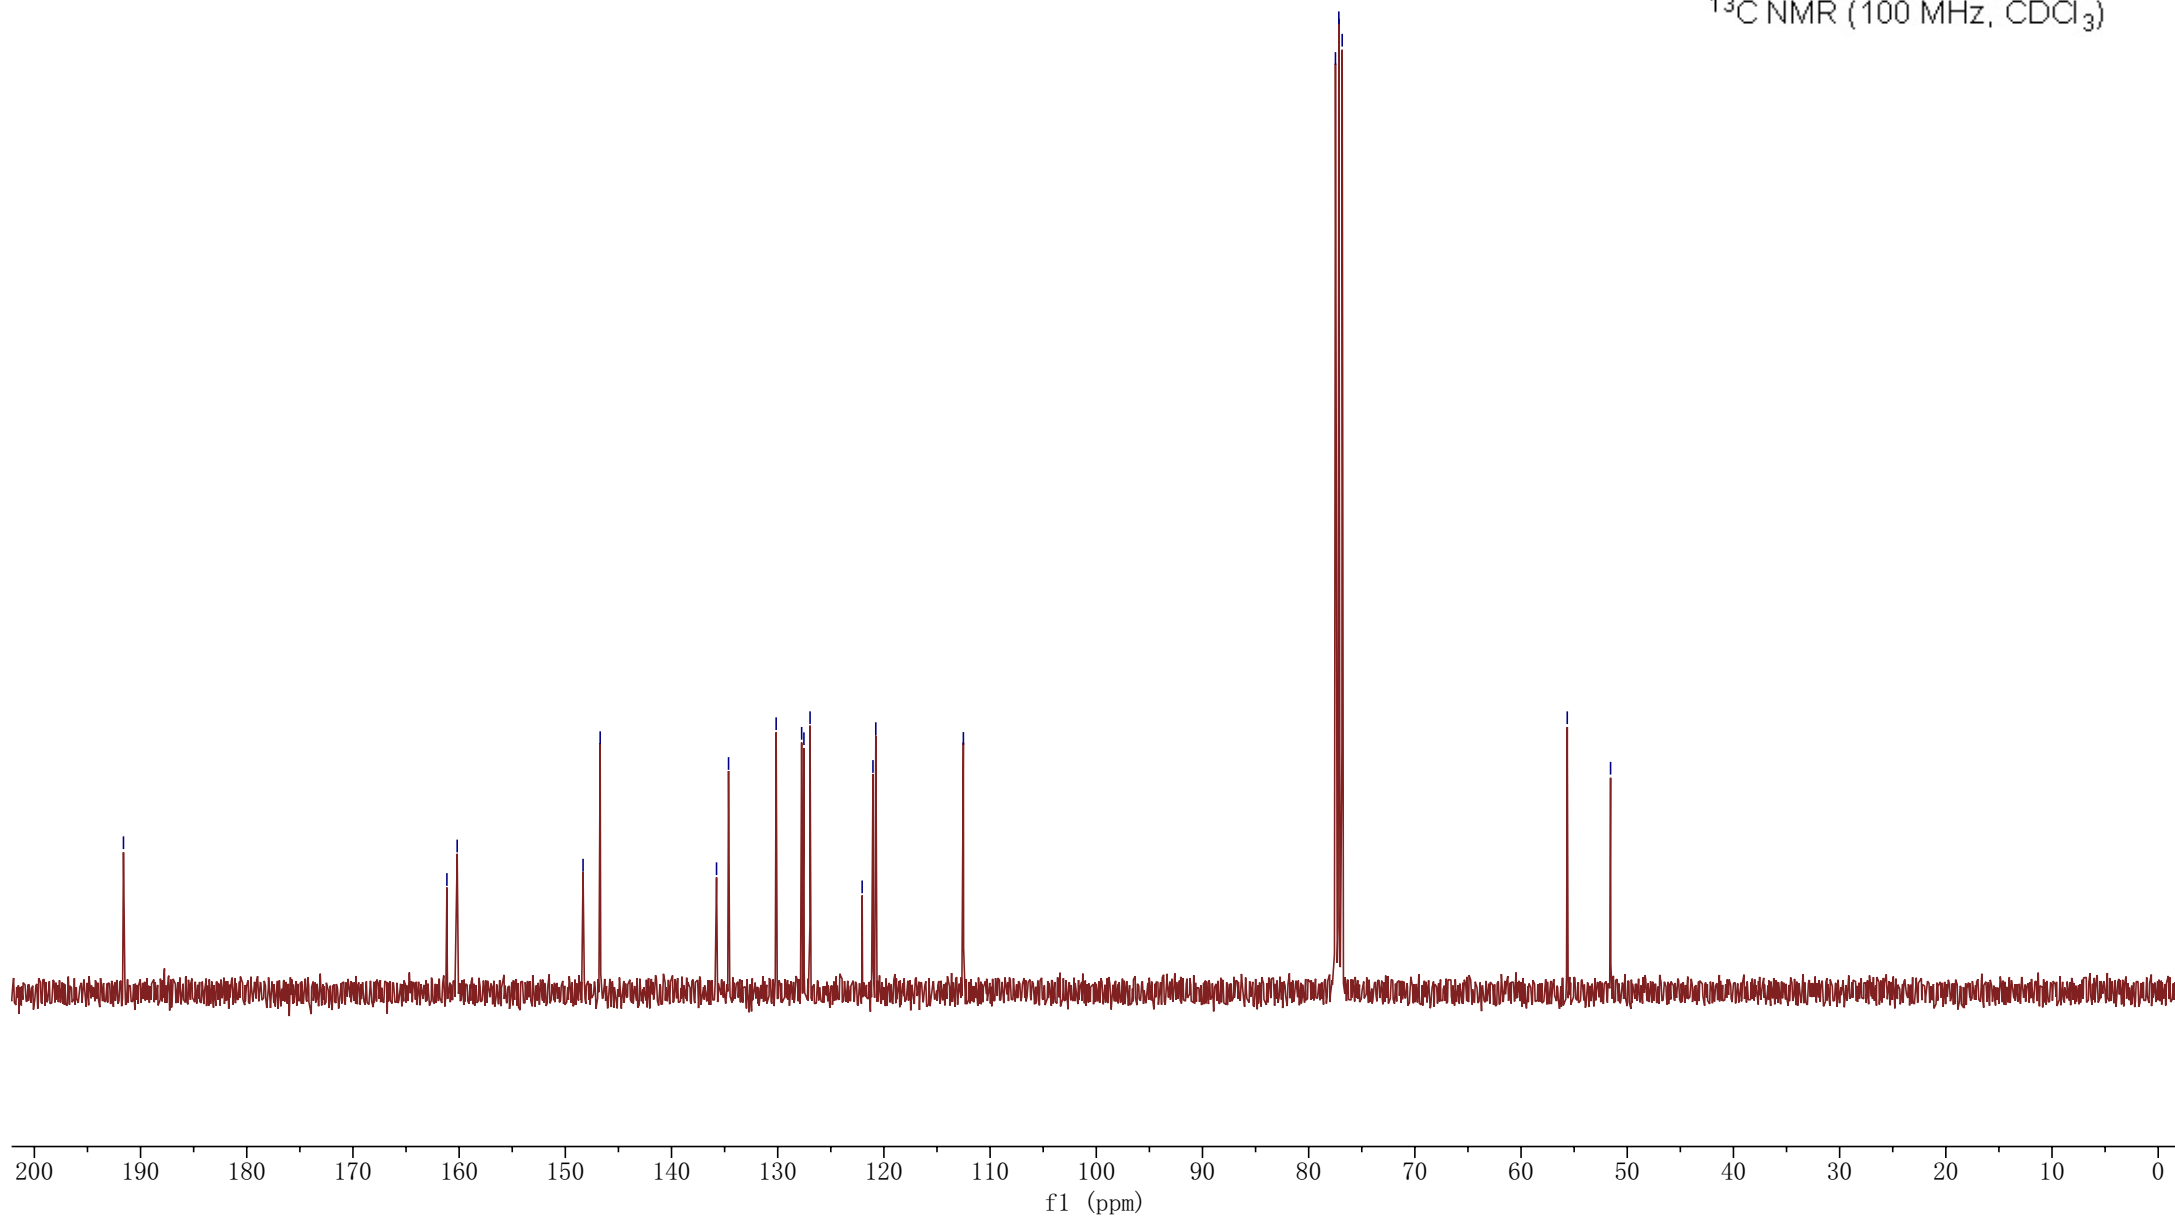

8.302  
8.298  
8.283  
8.280  
8.277  
7.969  
7.845  
7.841  
7.828  
7.824  
7.820  
7.800  
7.796  
7.784  
7.780  
7.776  
7.763  
7.759  
7.754  
7.737  
7.733  
7.526  
7.521  
7.509  
7.506  
7.501  
7.490  
7.485  
7.470  
7.466  
7.461  
7.451  
7.446  
7.442  
7.425  
7.421  
7.409  
7.405  
7.386  
7.260  
5.418  
-2.430

8.302  
8.298  
8.283  
8.280  
8.277  
7.969  
7.845  
7.841  
7.828  
7.824  
7.780  
7.776  
7.763  
7.759  
7.754  
7.526  
7.509  
7.506  
7.501  
7.451  
7.446  
7.442  
7.425  
7.405

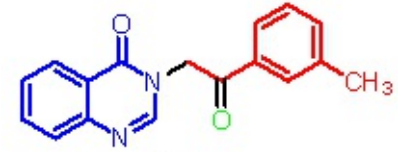

3aj

<sup>1</sup>H NMR (400 MHz, CDCl<sub>3</sub>)

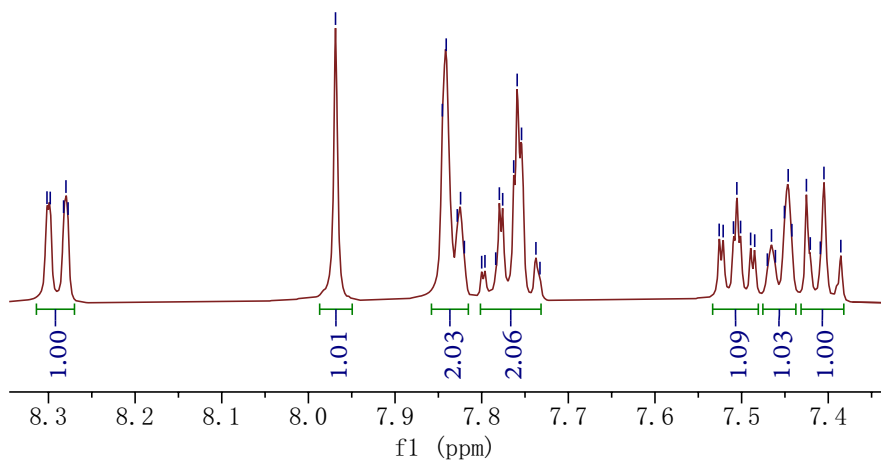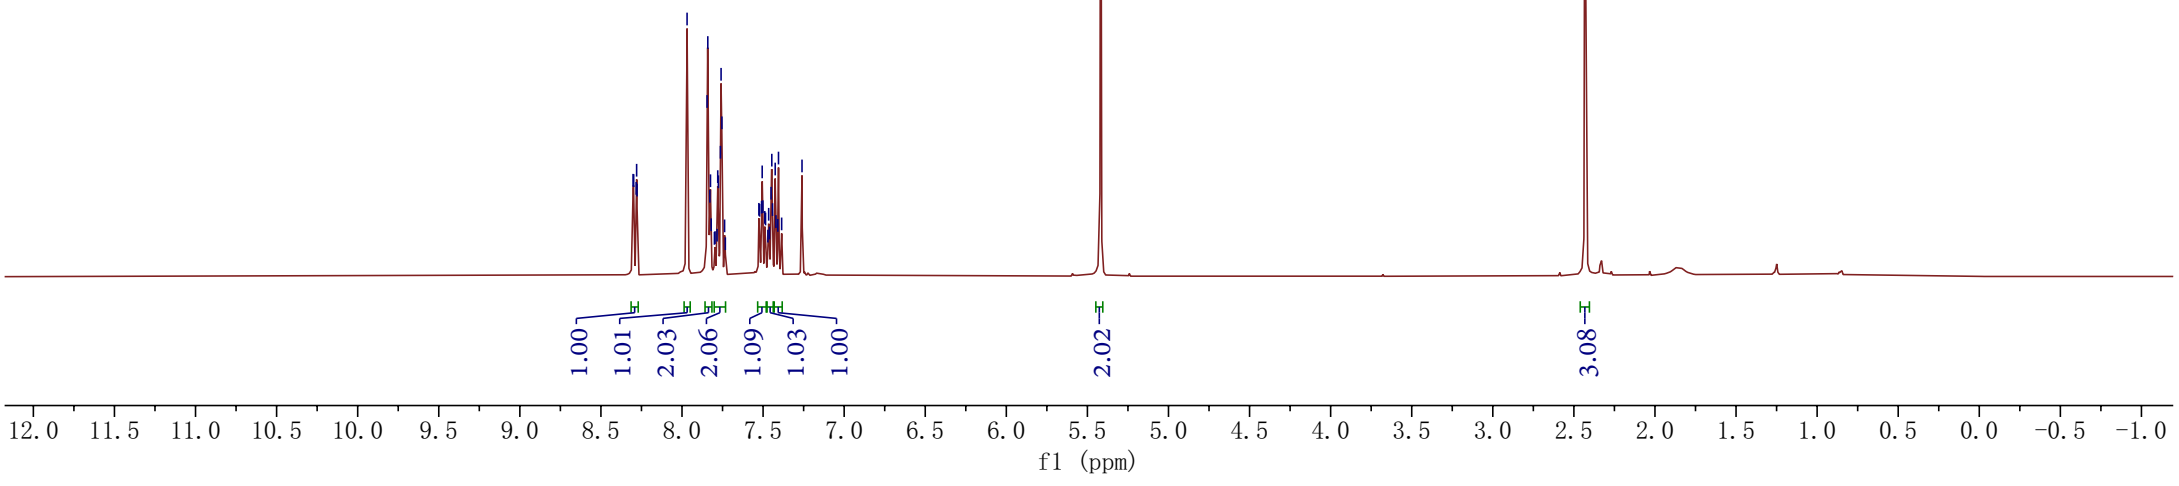

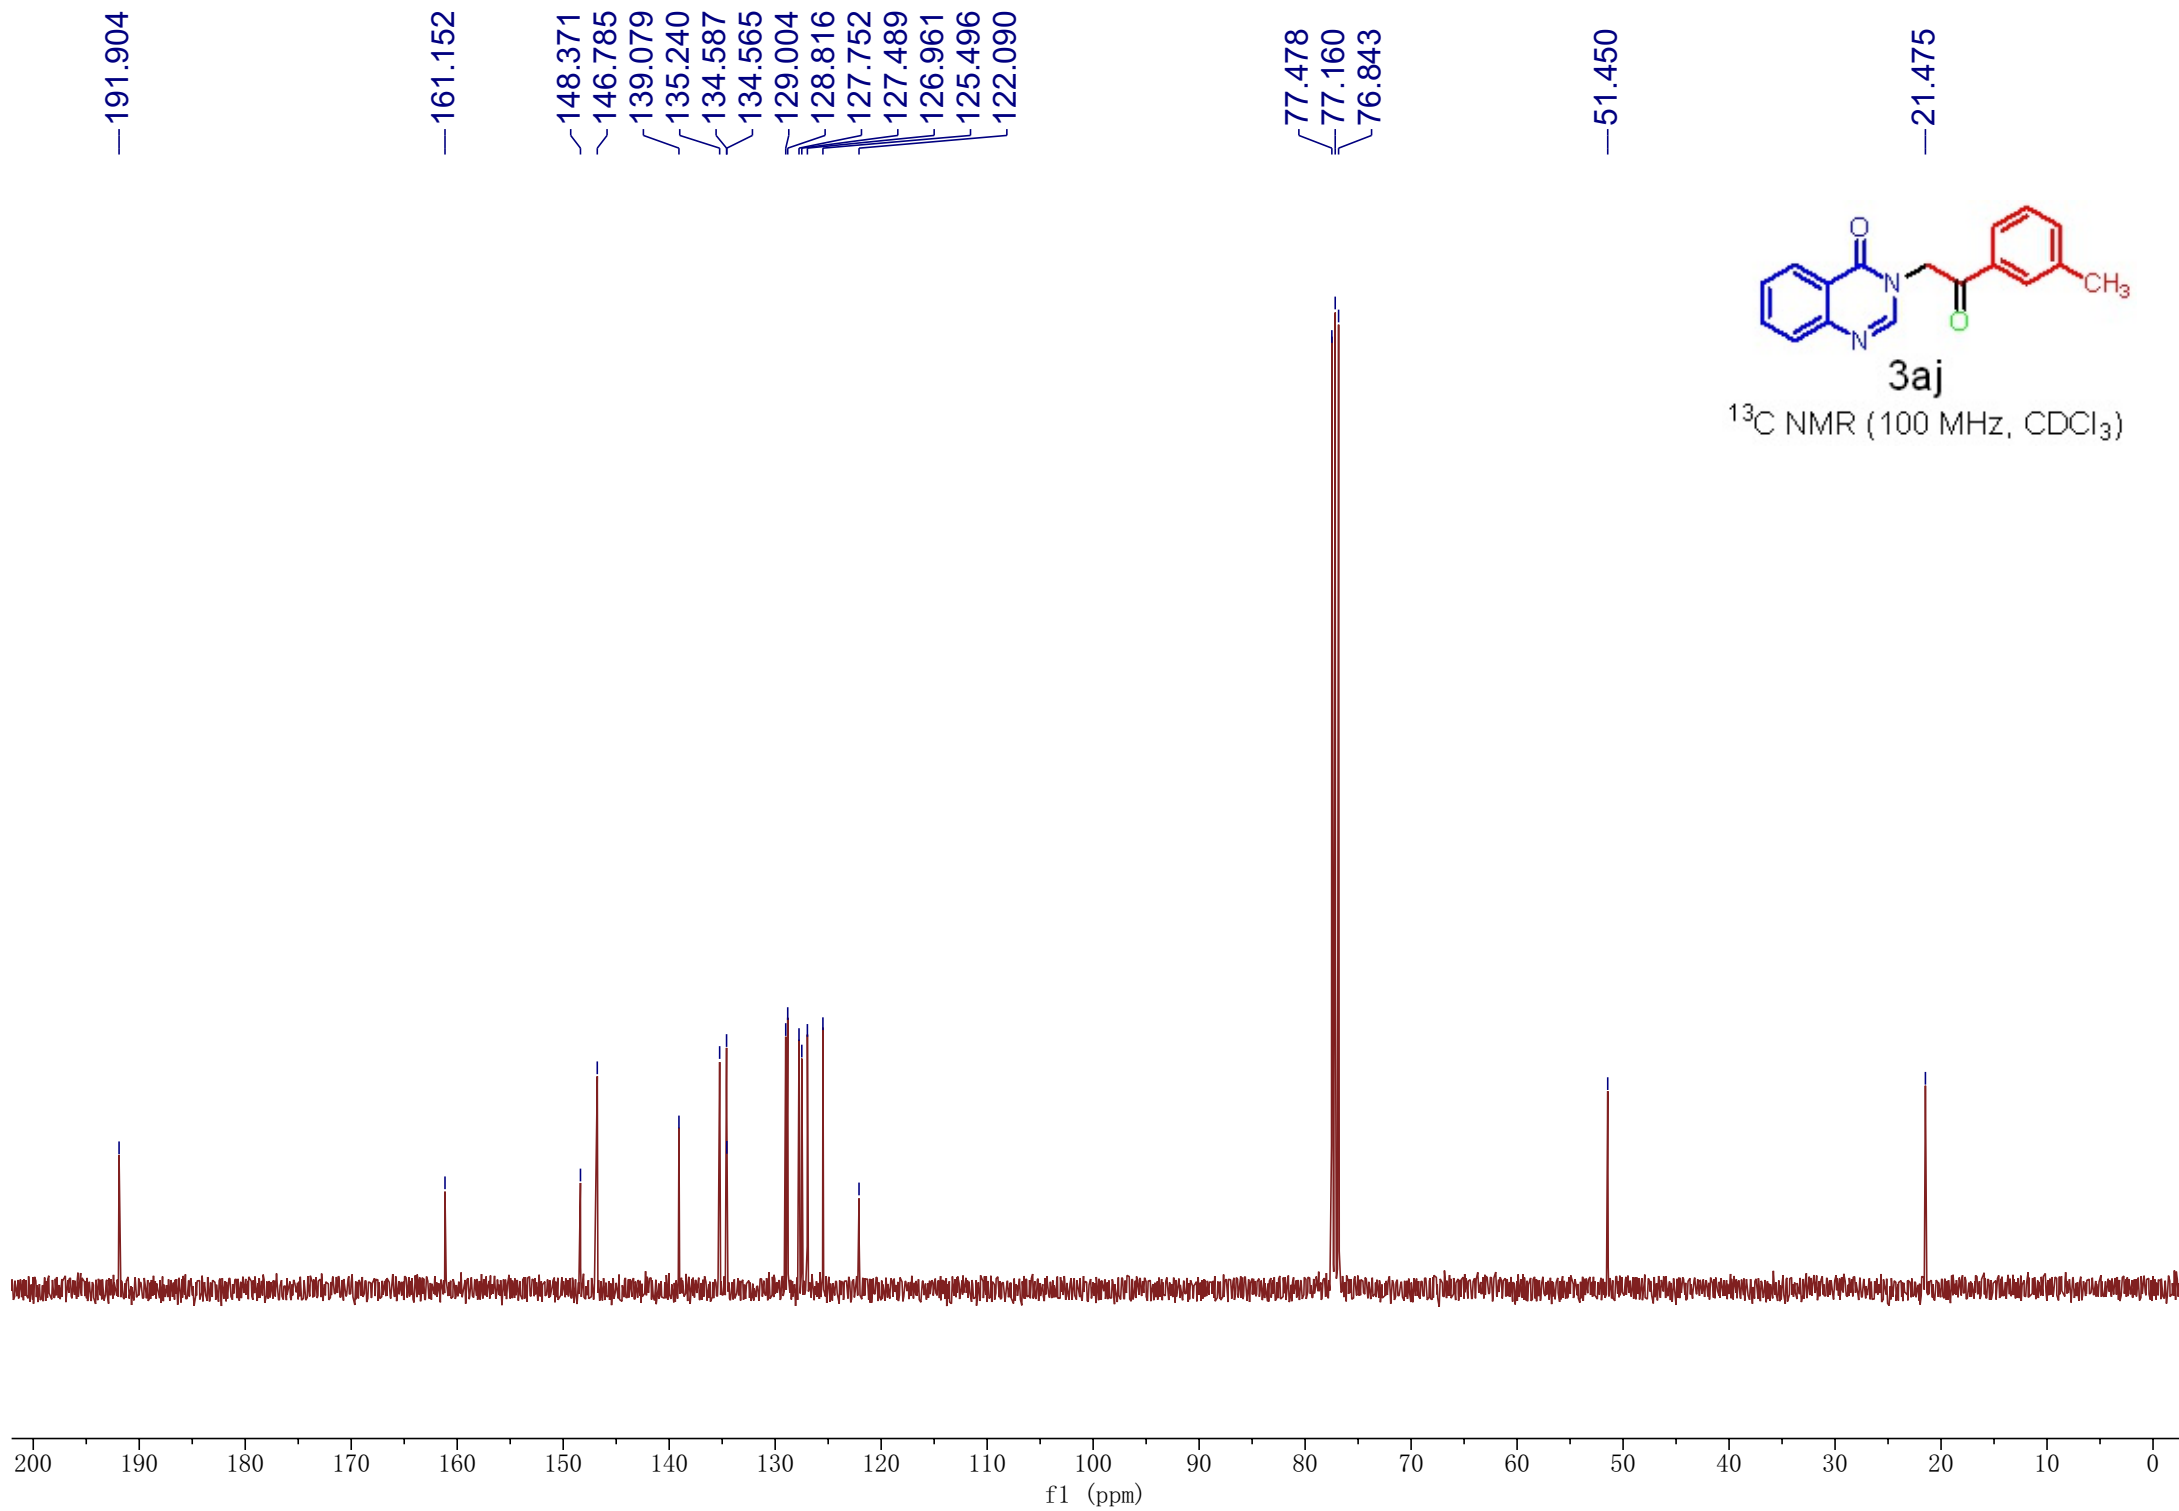

8.299  
8.297  
8.295  
8.294  
8.279  
8.276  
8.274  
8.274  
7.967  
7.934  
7.929  
7.914  
7.910  
7.779  
7.776  
7.764  
7.759  
7.755  
7.743  
7.740  
7.738  
7.736  
7.722  
7.721  
7.717  
7.715  
7.567  
7.562  
7.549  
7.546  
7.544  
7.541  
7.528  
7.523  
7.505  
7.500  
7.489  
7.485  
7.480  
7.469  
7.464  
7.260  
7.063  
7.061  
7.045  
7.042  
7.033

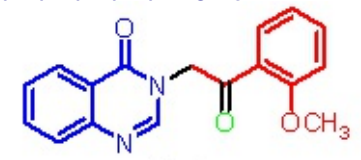

3ak

<sup>1</sup>H NMR (400 MHz, CDCl<sub>3</sub>)

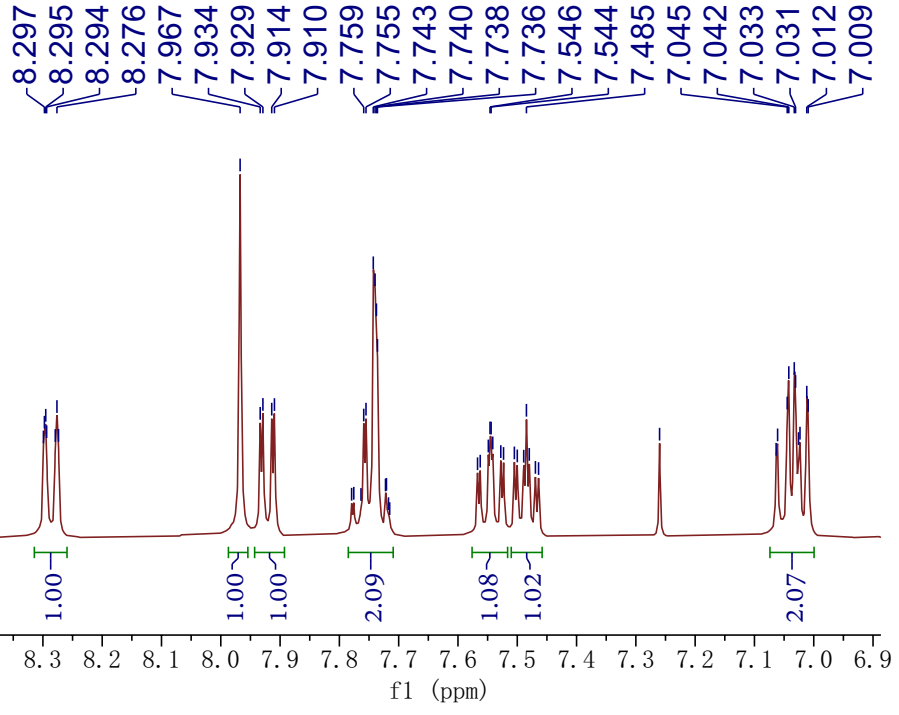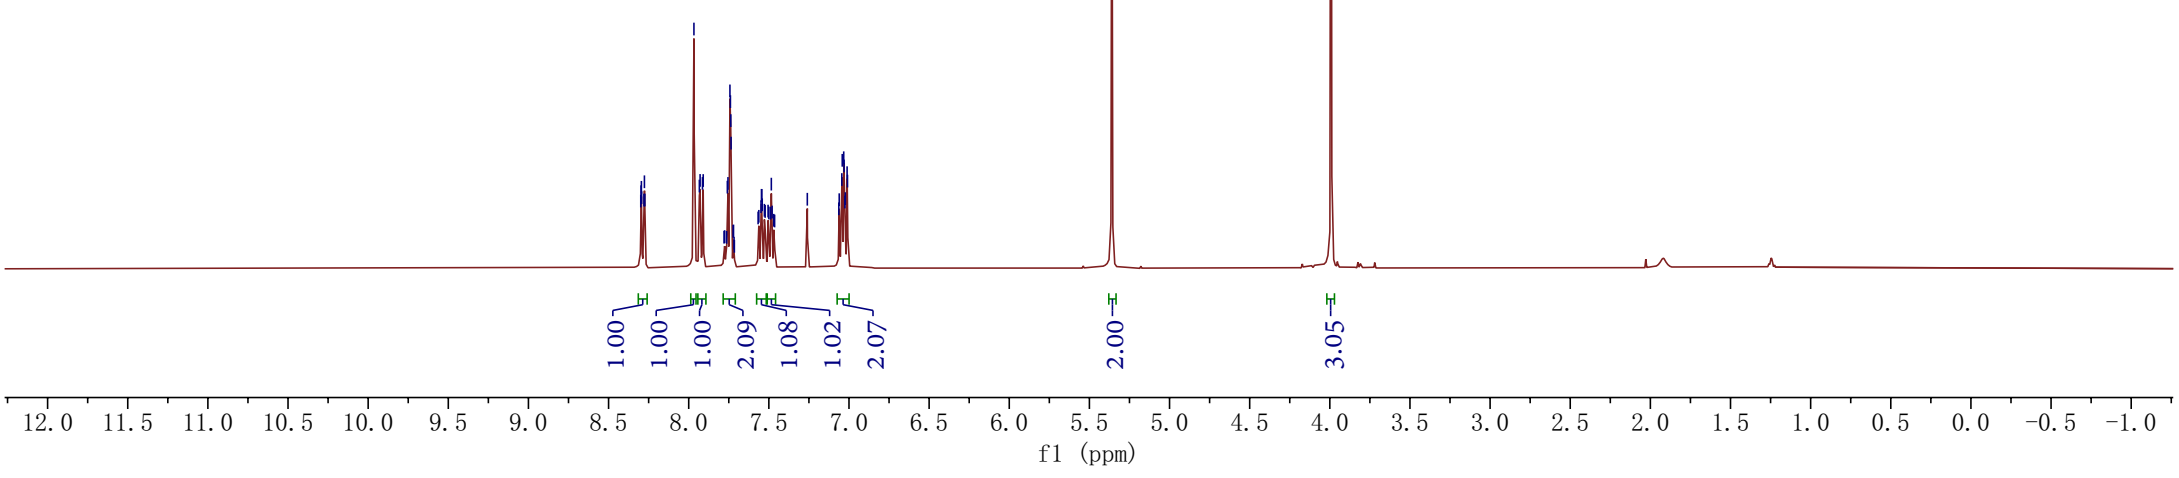



—192.52

~161.21  
~159.70

~148.43  
~147.15  
~135.42  
~134.39  
~131.44  
~127.63  
~127.28  
~126.93  
~124.66  
~122.24  
~121.28

—111.73

~77.48  
~77.16  
~76.84

~56.29  
~55.80

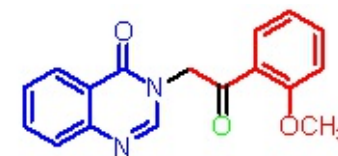

3ak

<sup>13</sup>C NMR (100 MHz, CDCl<sub>3</sub>)

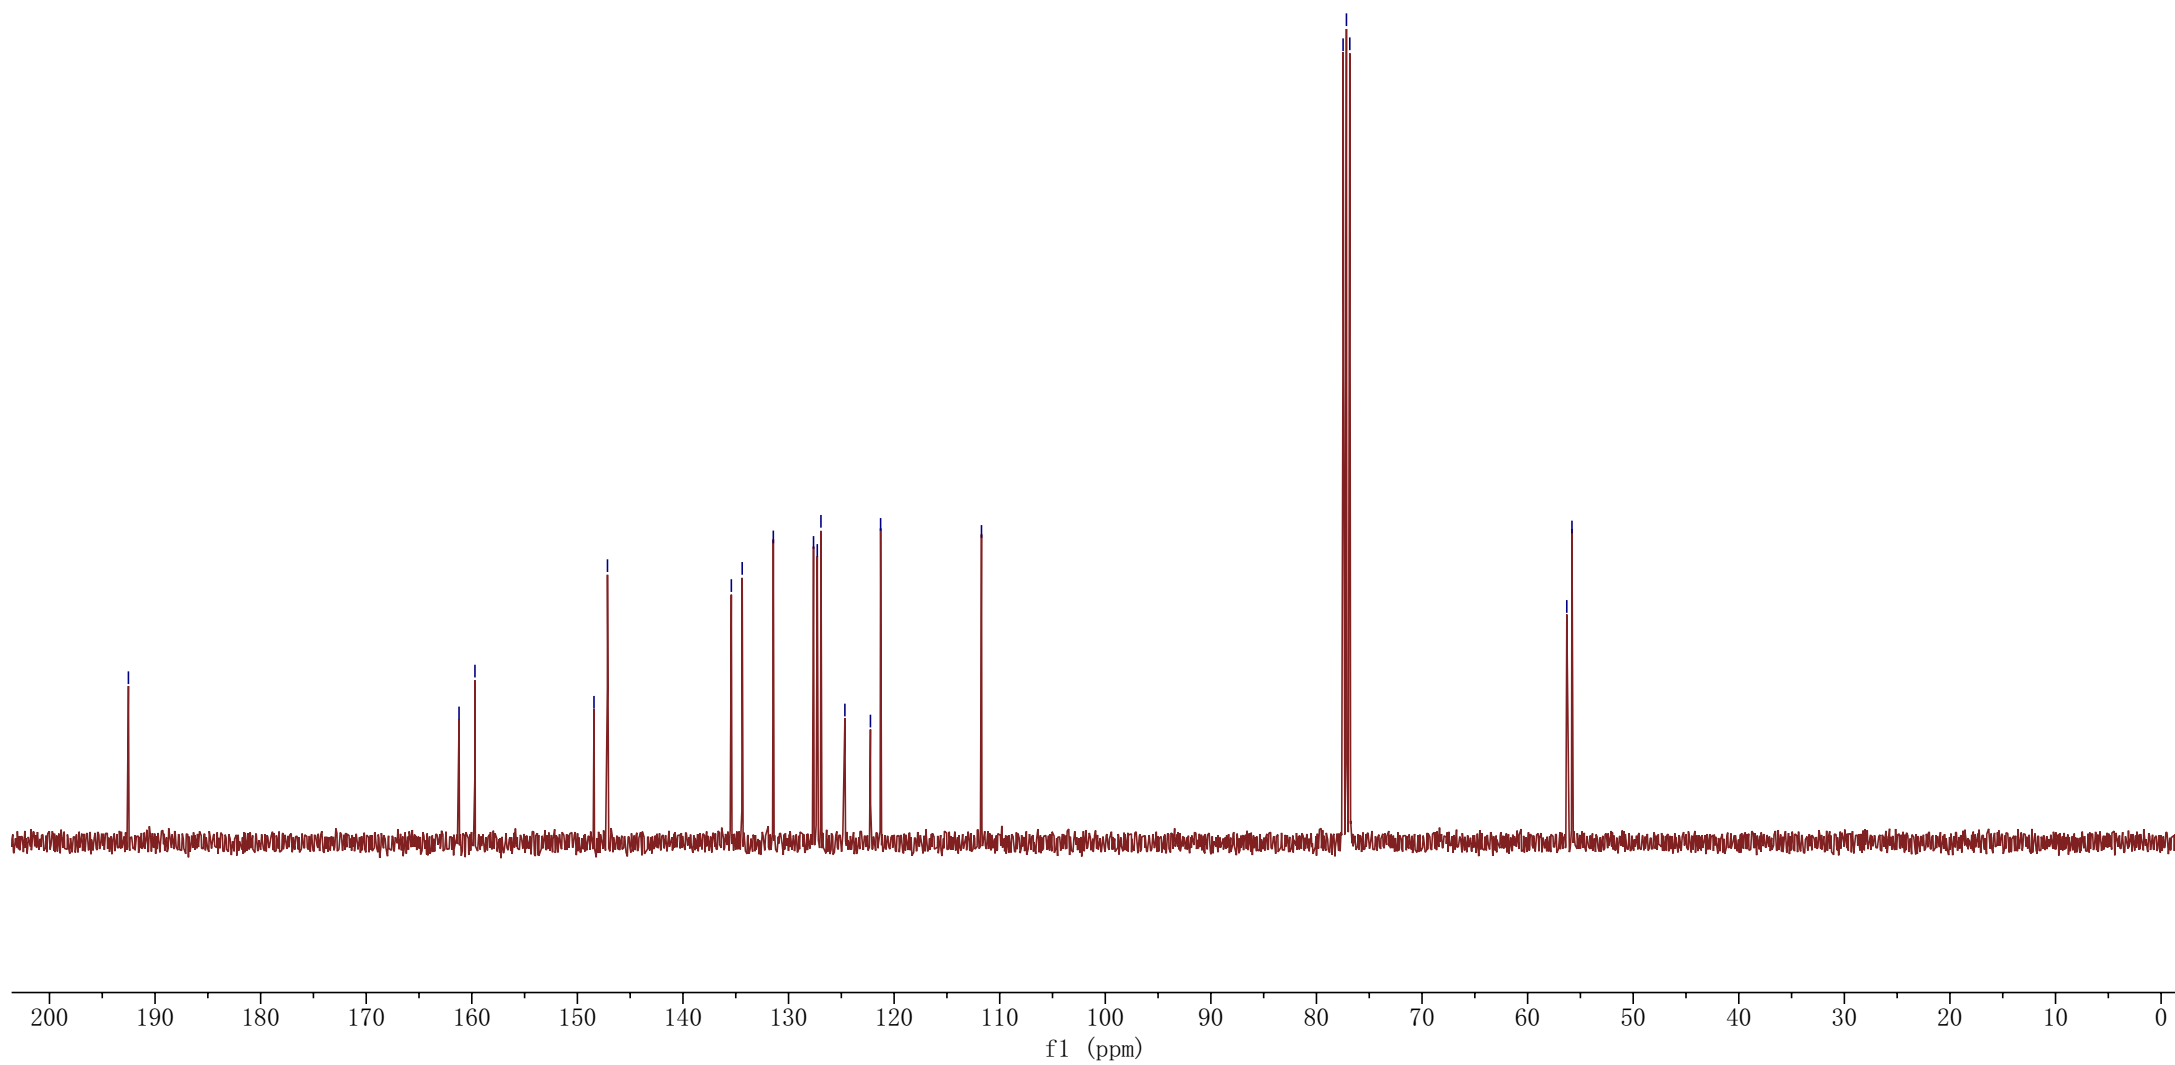

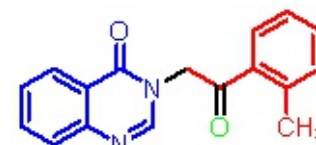

3al

<sup>1</sup>H NMR (400 MHz, CDCl<sub>3</sub>)

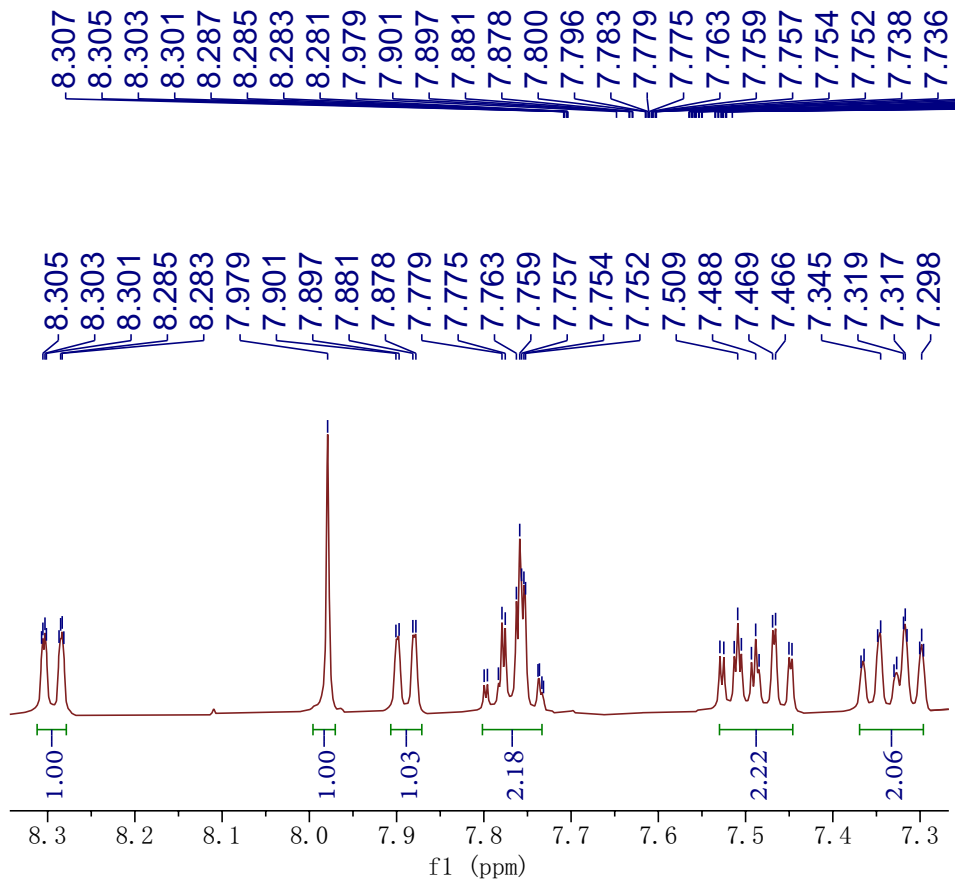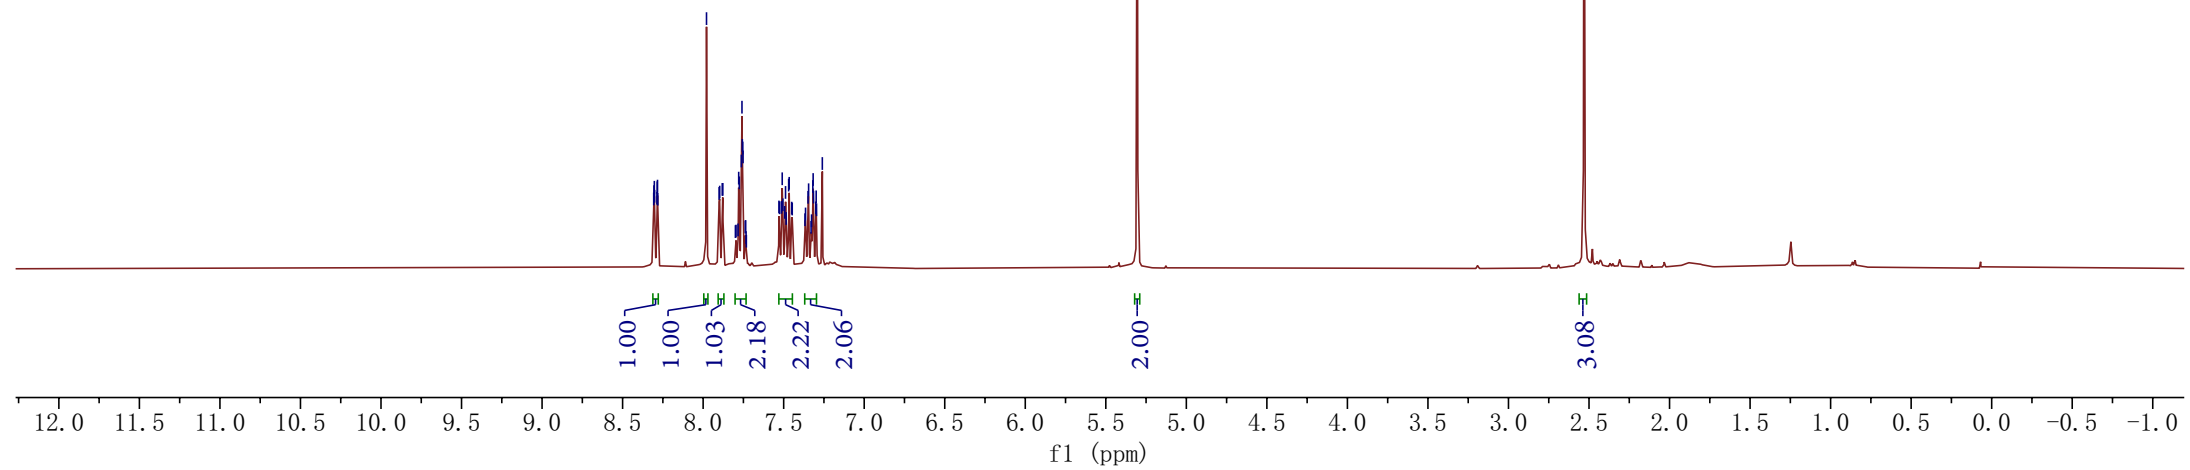

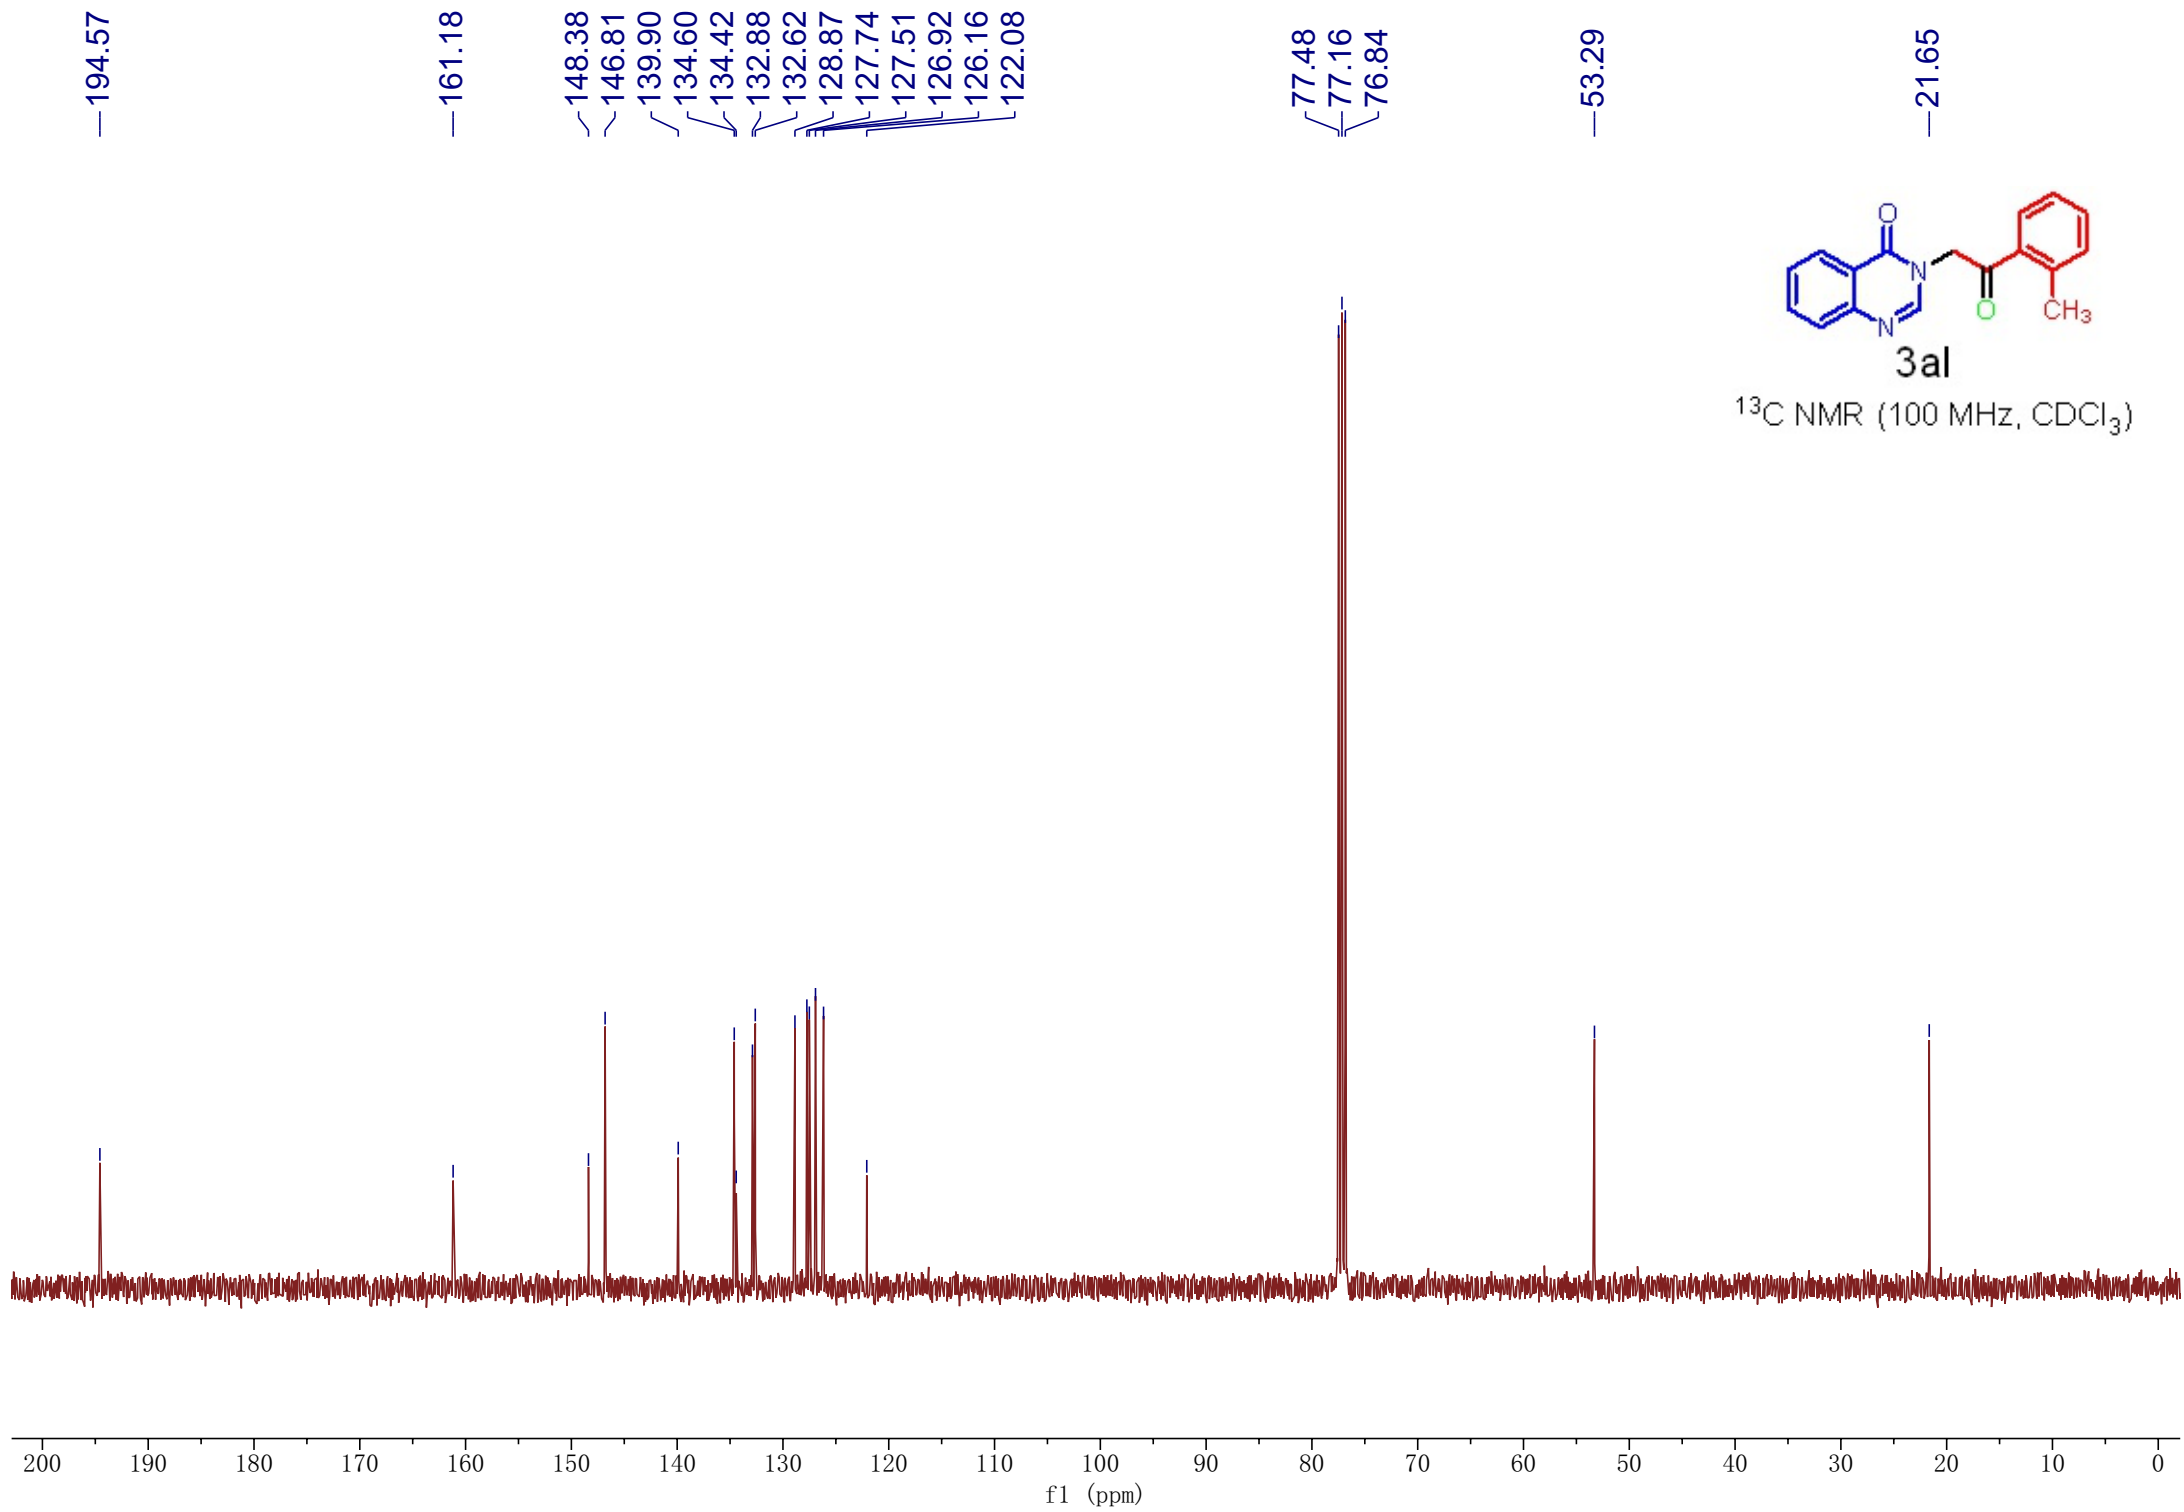

8.591  
8.588  
8.585  
8.310  
8.306  
8.291  
8.288  
8.285  
8.052  
8.048  
8.031  
8.048  
8.031  
8.025  
8.025  
7.999  
7.999  
7.978  
7.978  
7.939  
7.939  
7.917  
7.917  
7.901  
7.901  
7.880  
7.880  
7.880  
7.800  
7.800  
7.796  
7.796  
7.784  
7.784  
7.779  
7.779  
7.775  
7.775  
7.763  
7.763  
7.760  
7.760  
7.757  
7.757  
7.745  
7.745  
7.665  
7.665  
7.662  
7.662  
7.648  
7.648  
7.645  
7.645  
7.641  
7.641  
7.628  
7.628  
7.624  
7.624  
7.606  
7.606  
7.603  
7.603  
7.589  
7.589  
7.586  
7.586  
7.582  
7.582  
7.569  
7.569  
7.565  
7.565  
7.522  
7.522  
7.516  
7.516  
7.506  
7.506  
7.501  
7.501  
7.496  
7.496  
7.486  
7.486  
7.481  
7.481  
7.260  
7.260  
5.563

8.591  
8.588  
8.585  
8.306  
8.288  
8.052  
8.048  
8.031  
8.025  
7.999  
7.978  
7.939  
7.917  
7.901  
7.880  
7.779  
7.775  
7.763  
7.760  
7.757  
7.645  
7.586  
7.501

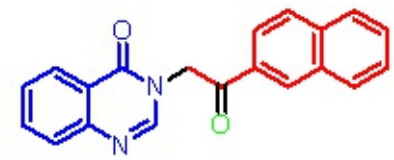

3am

<sup>1</sup>H NMR (400 MHz, CDCl<sub>3</sub>)

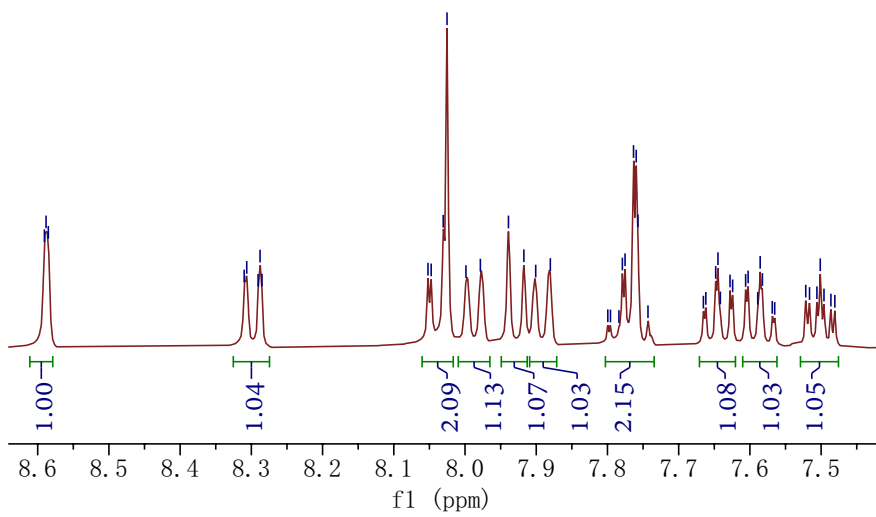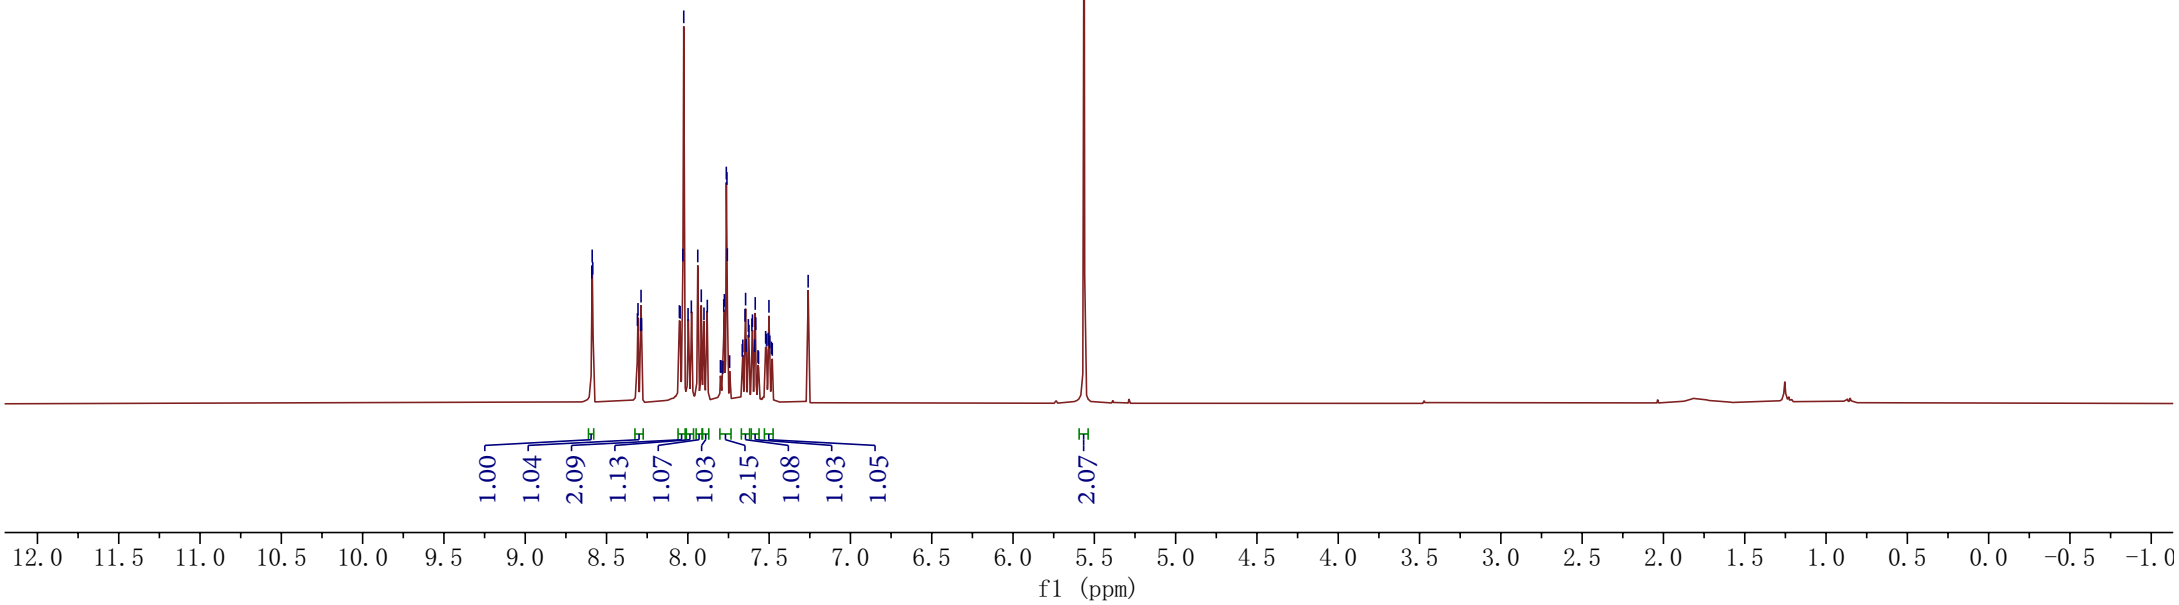

—191.71

—161.20

148.39

146.80

136.21

134.61

132.52

131.86

130.33

129.83

129.28

129.14

128.05

127.77

127.51

127.32

126.96

123.56

122.09

77.48

77.16

76.84

—51.46

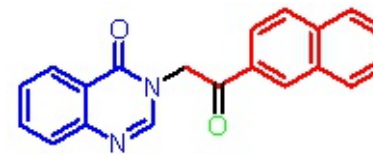

3am

<sup>13</sup>C NMR (100 MHz, CDCl<sub>3</sub>)

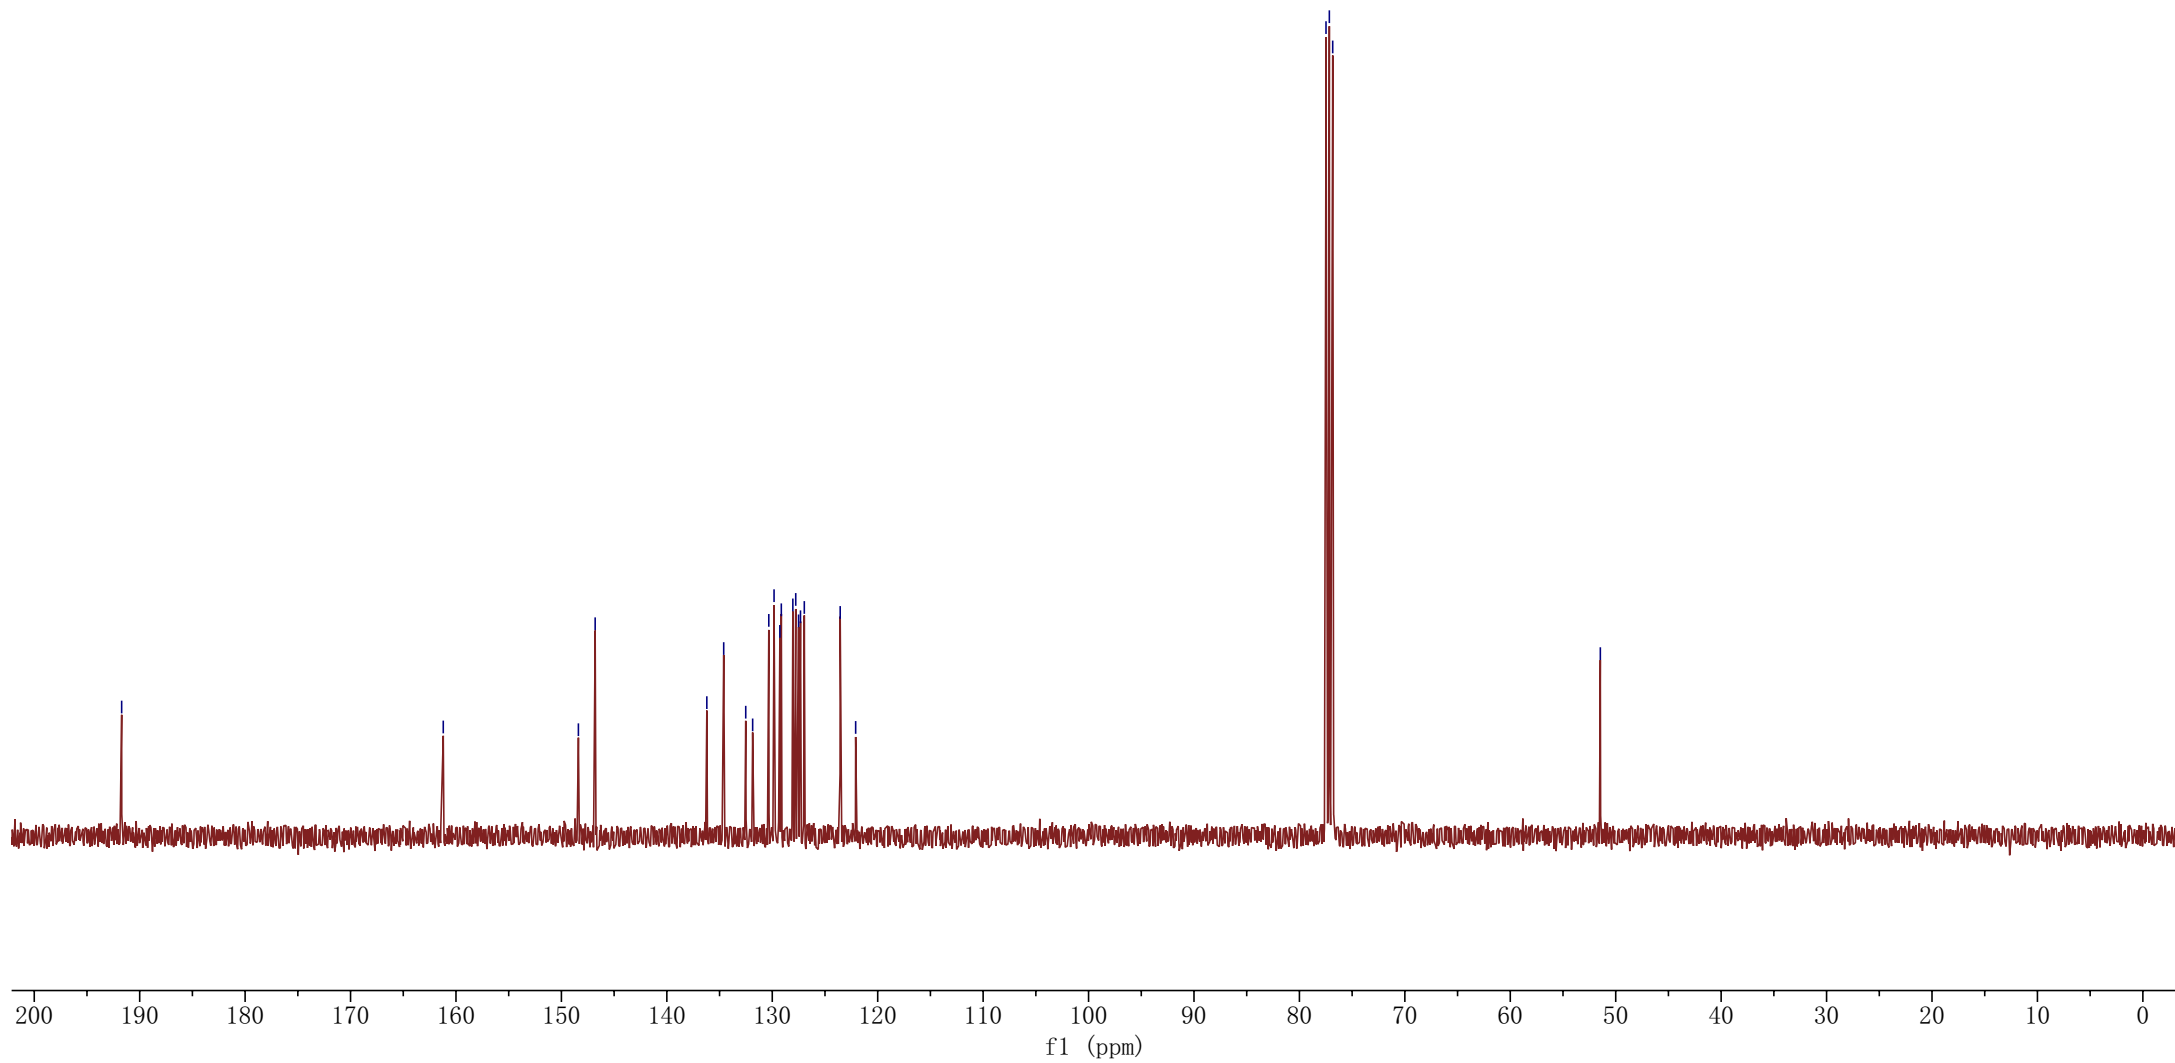

8.293  
8.290  
8.273  
8.270  
8.017  
7.937  
7.934  
7.927  
7.924  
7.780  
7.776  
7.763  
7.760  
7.755  
7.750  
7.747  
7.734  
7.730  
7.527  
7.523  
7.511  
7.507  
7.503  
7.491  
7.486  
7.260  
7.215  
7.205  
7.203  
7.193  
7.190

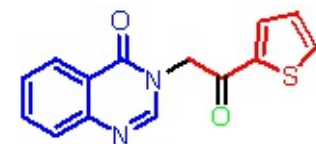

3an

<sup>1</sup>H NMR (400 MHz, CDCl<sub>3</sub>)

8.293  
8.290  
8.273  
8.270  
8.017  
7.937  
7.934  
7.927  
7.924  
7.780  
7.776  
7.763  
7.760  
7.755  
7.750  
7.747  
7.511  
7.507  
7.503  
7.260  
7.215  
7.205  
7.203  
7.193

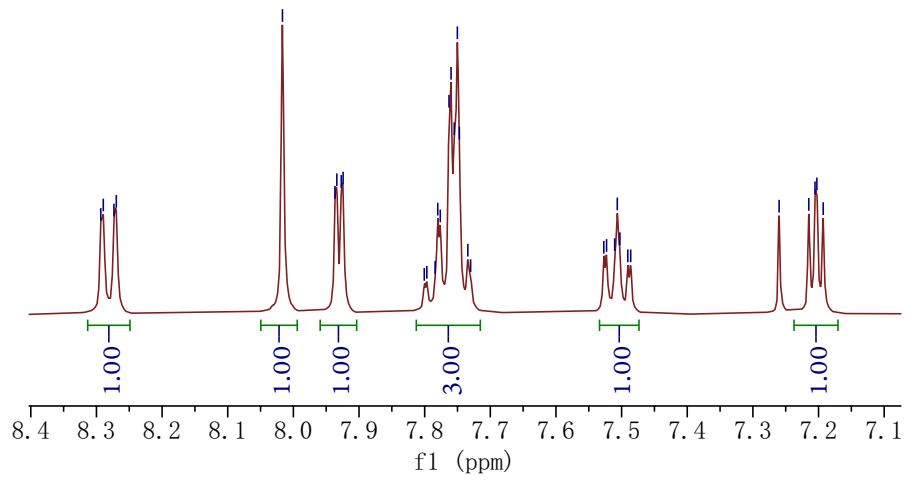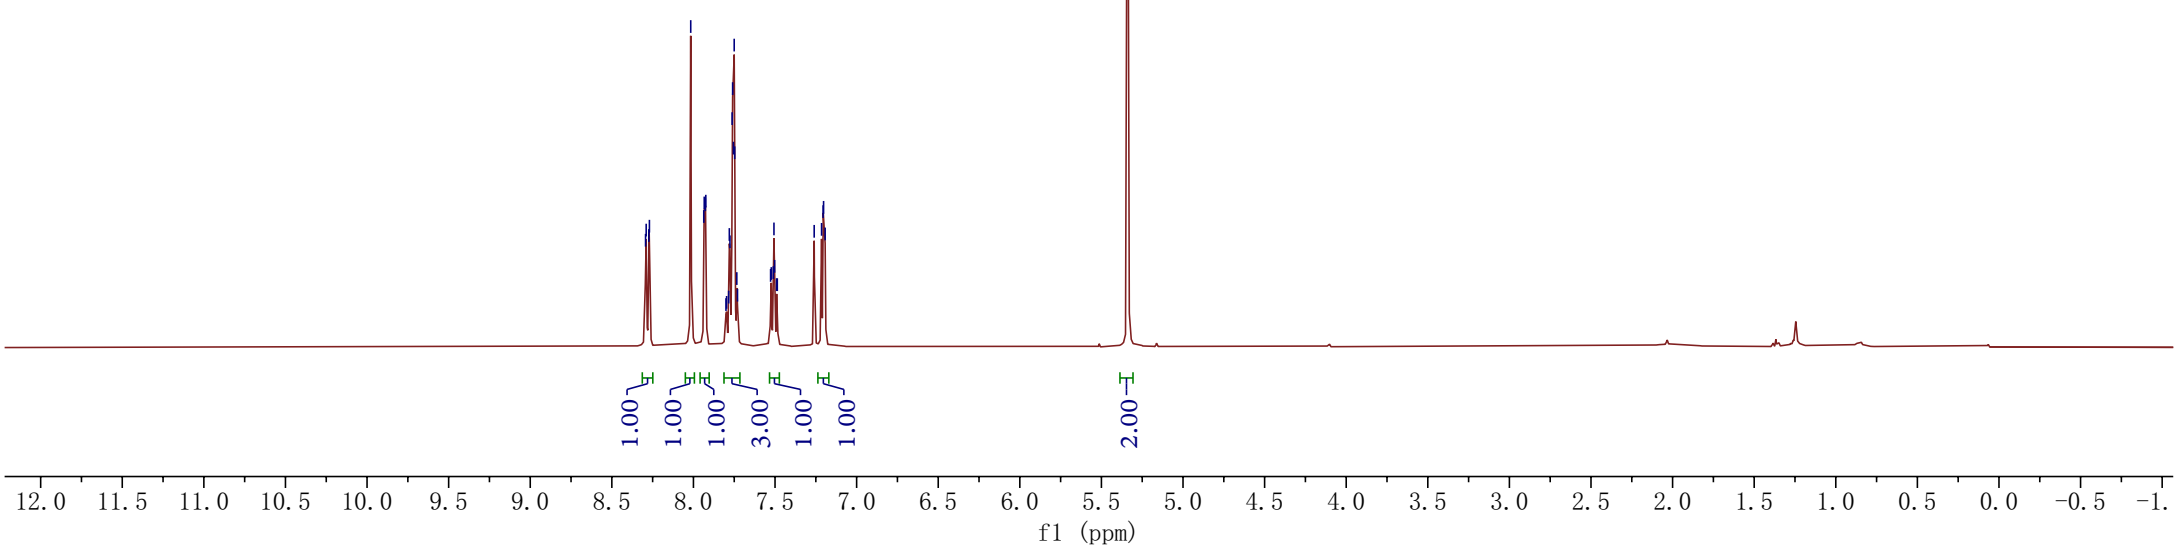

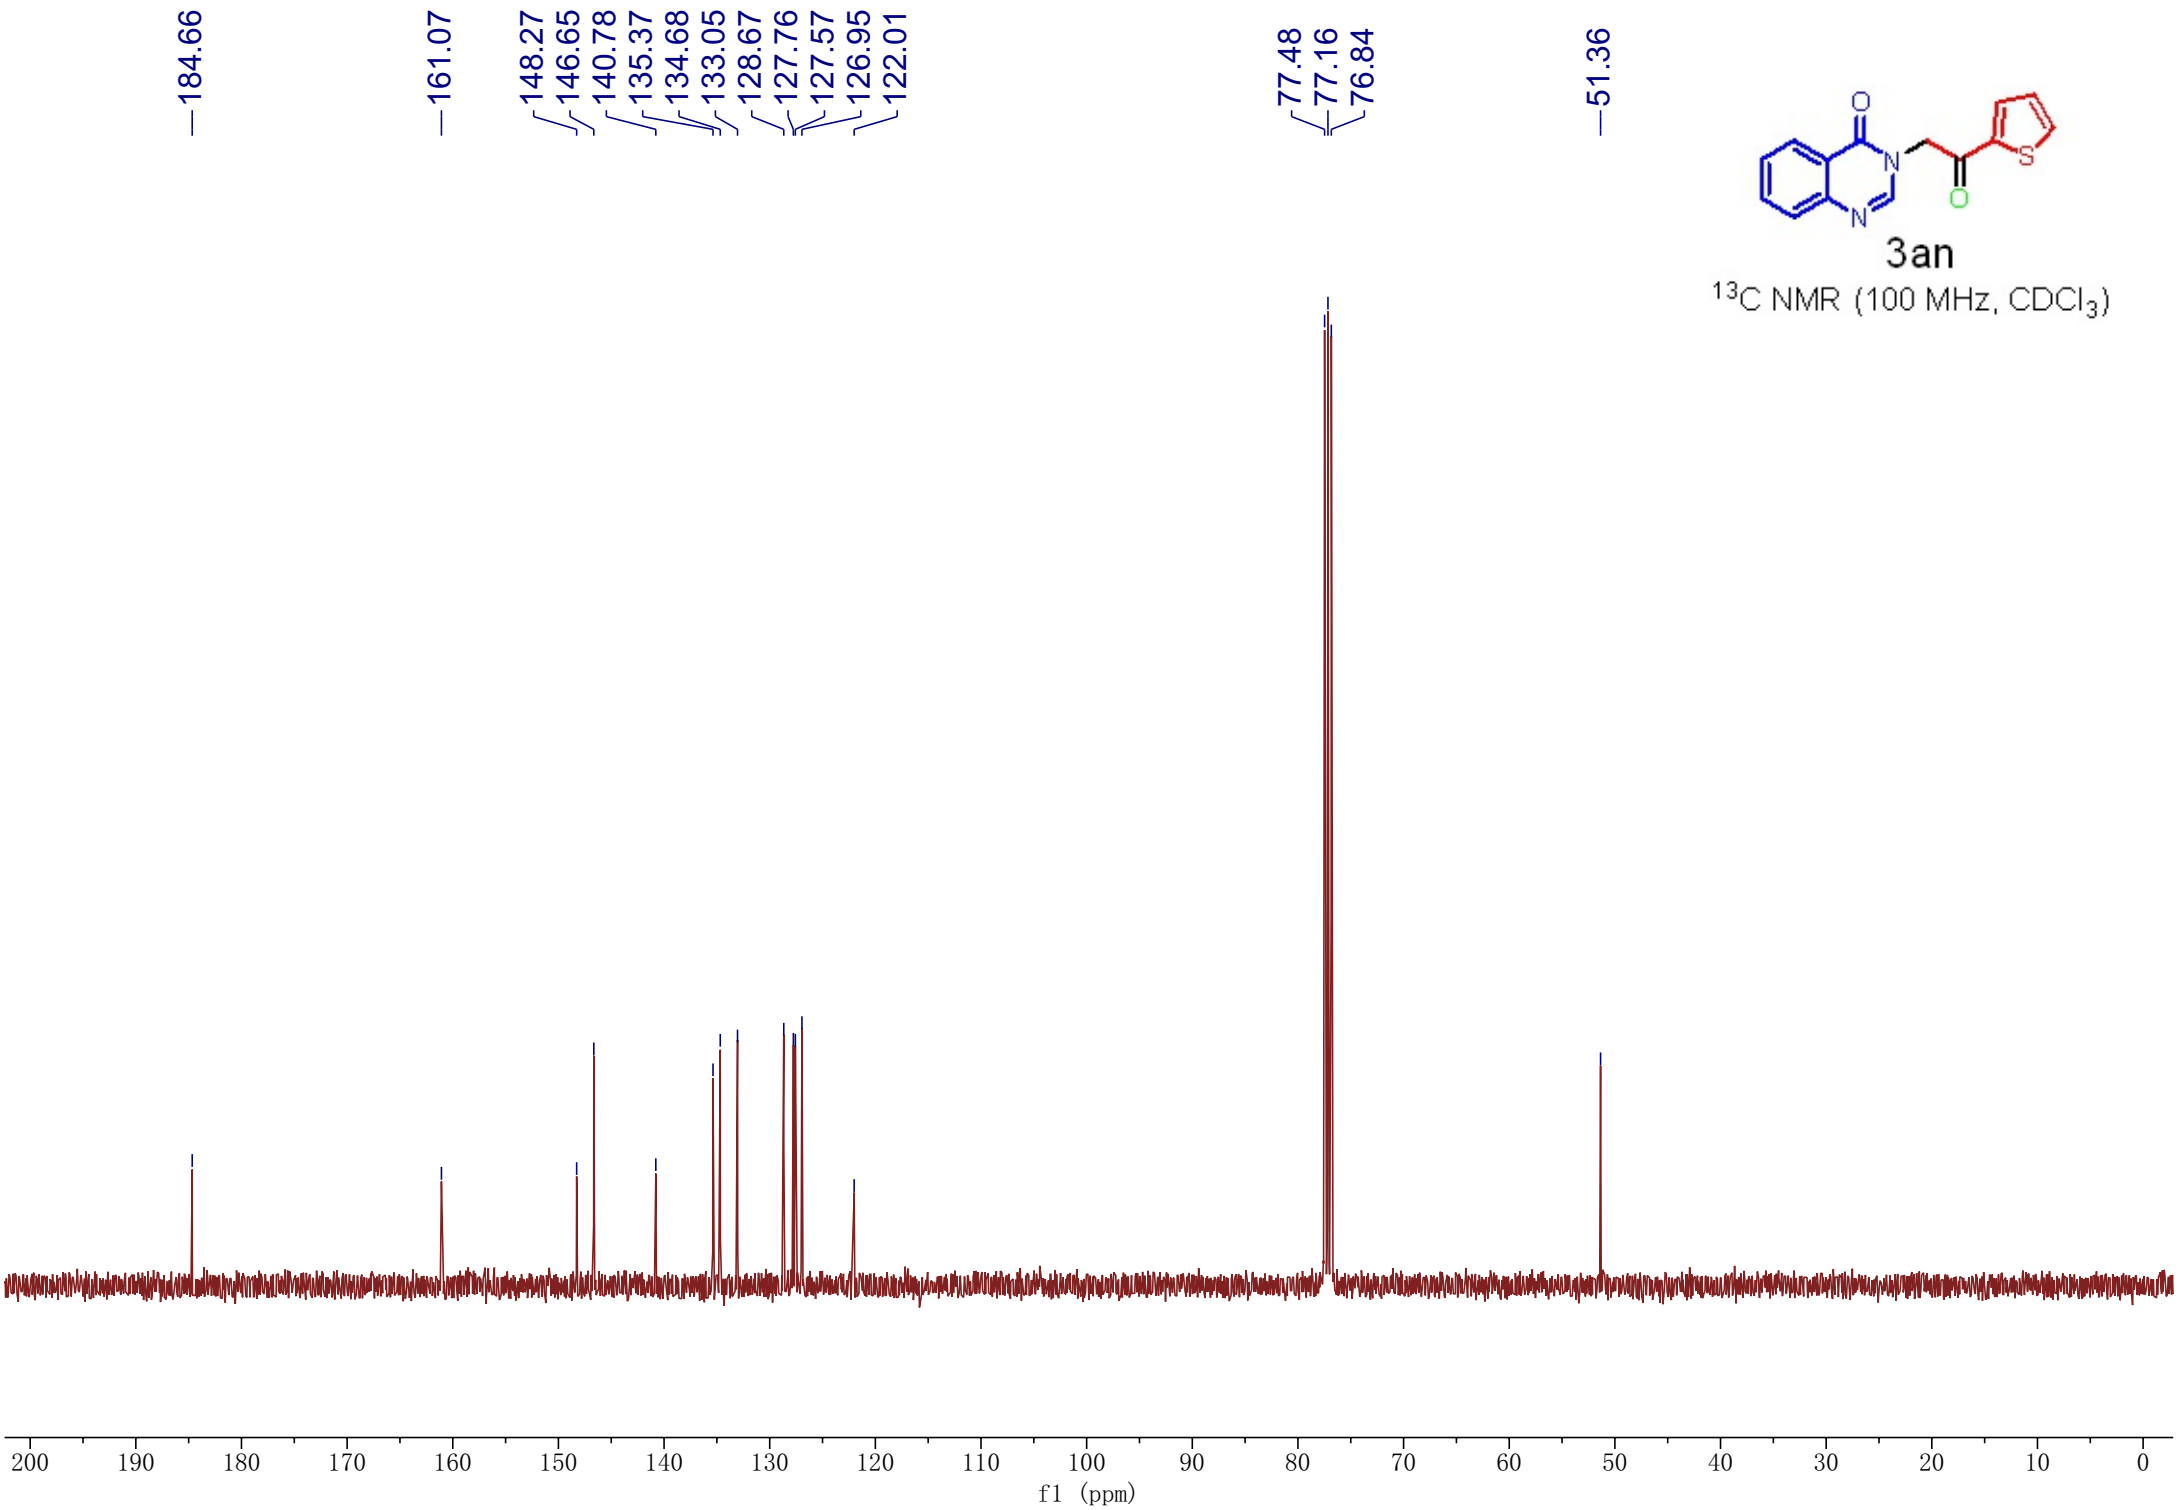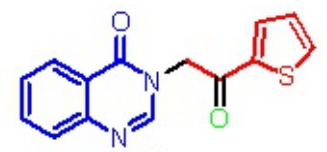

3an

<sup>13</sup>C NMR (100 MHz, CDCl<sub>3</sub>)

8.046  
8.041  
8.038  
8.034  
8.025  
8.021  
8.017  
7.986  
7.689  
7.669  
7.652  
7.648  
7.634  
7.629  
7.618  
7.615  
7.612  
7.529  
7.525  
7.513  
7.509  
7.505  
7.491  
7.337  
7.334  
7.316  
7.314  
7.260  
6.932  
6.911  
6.911

3.957

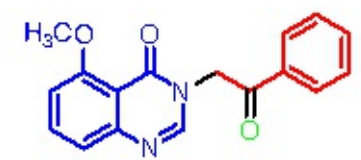

3ba

<sup>1</sup>H NMR (400 MHz, CDCl<sub>3</sub>)

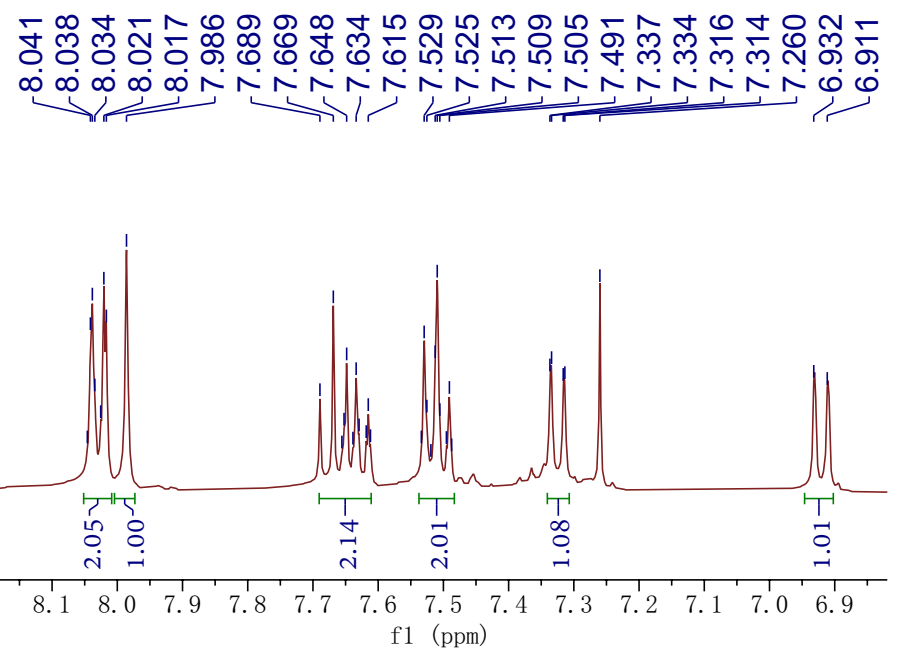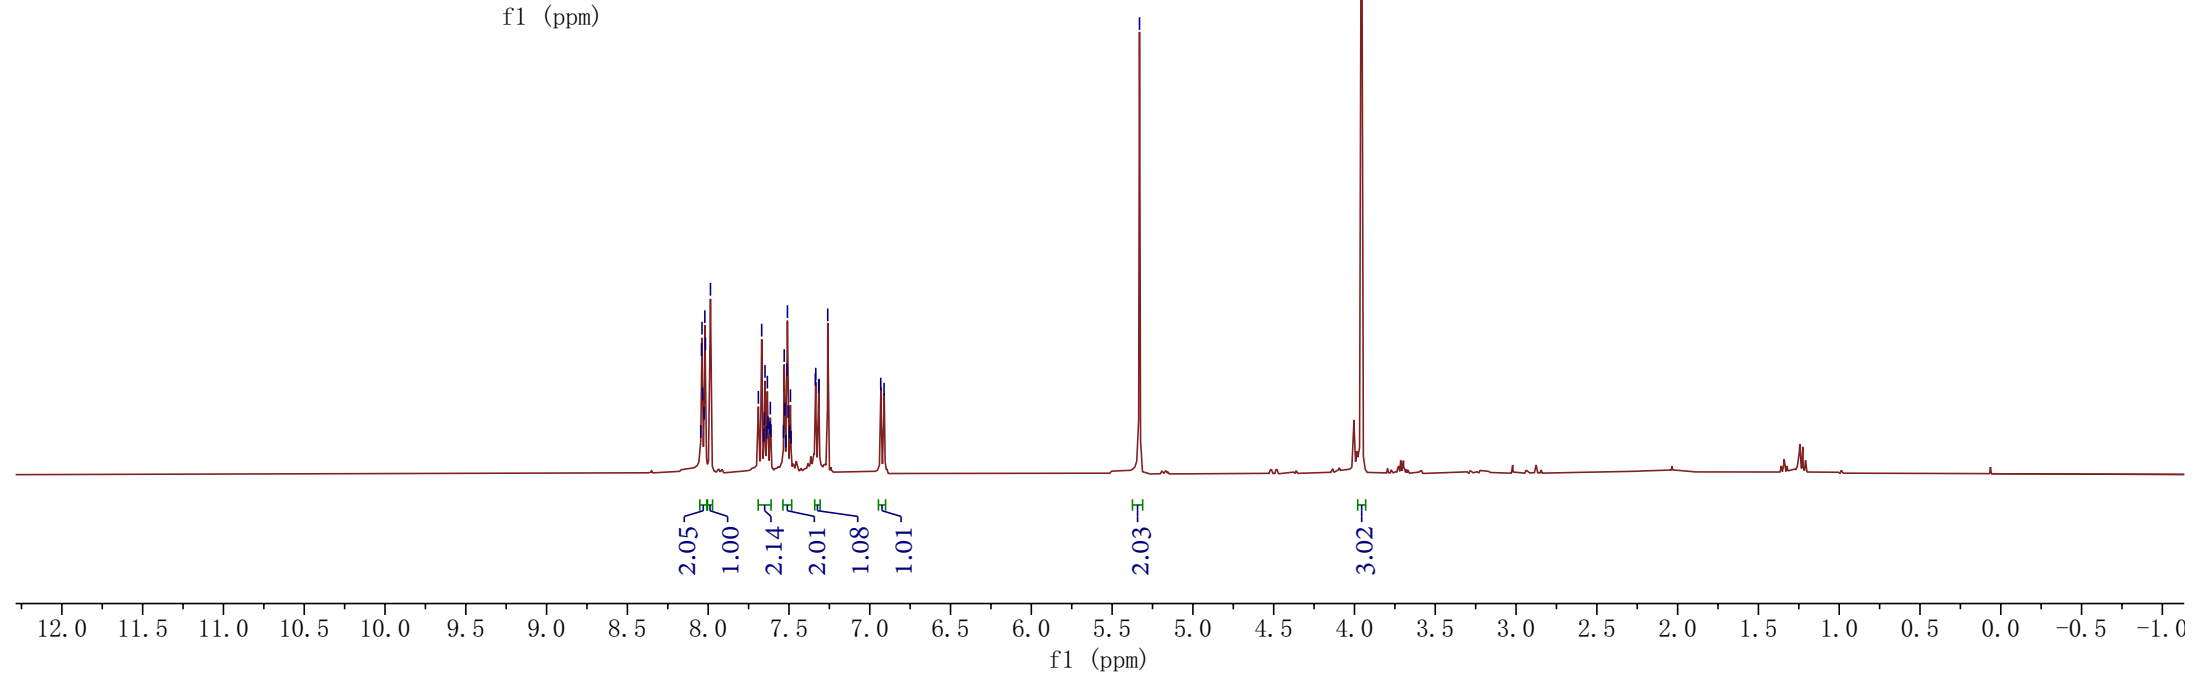



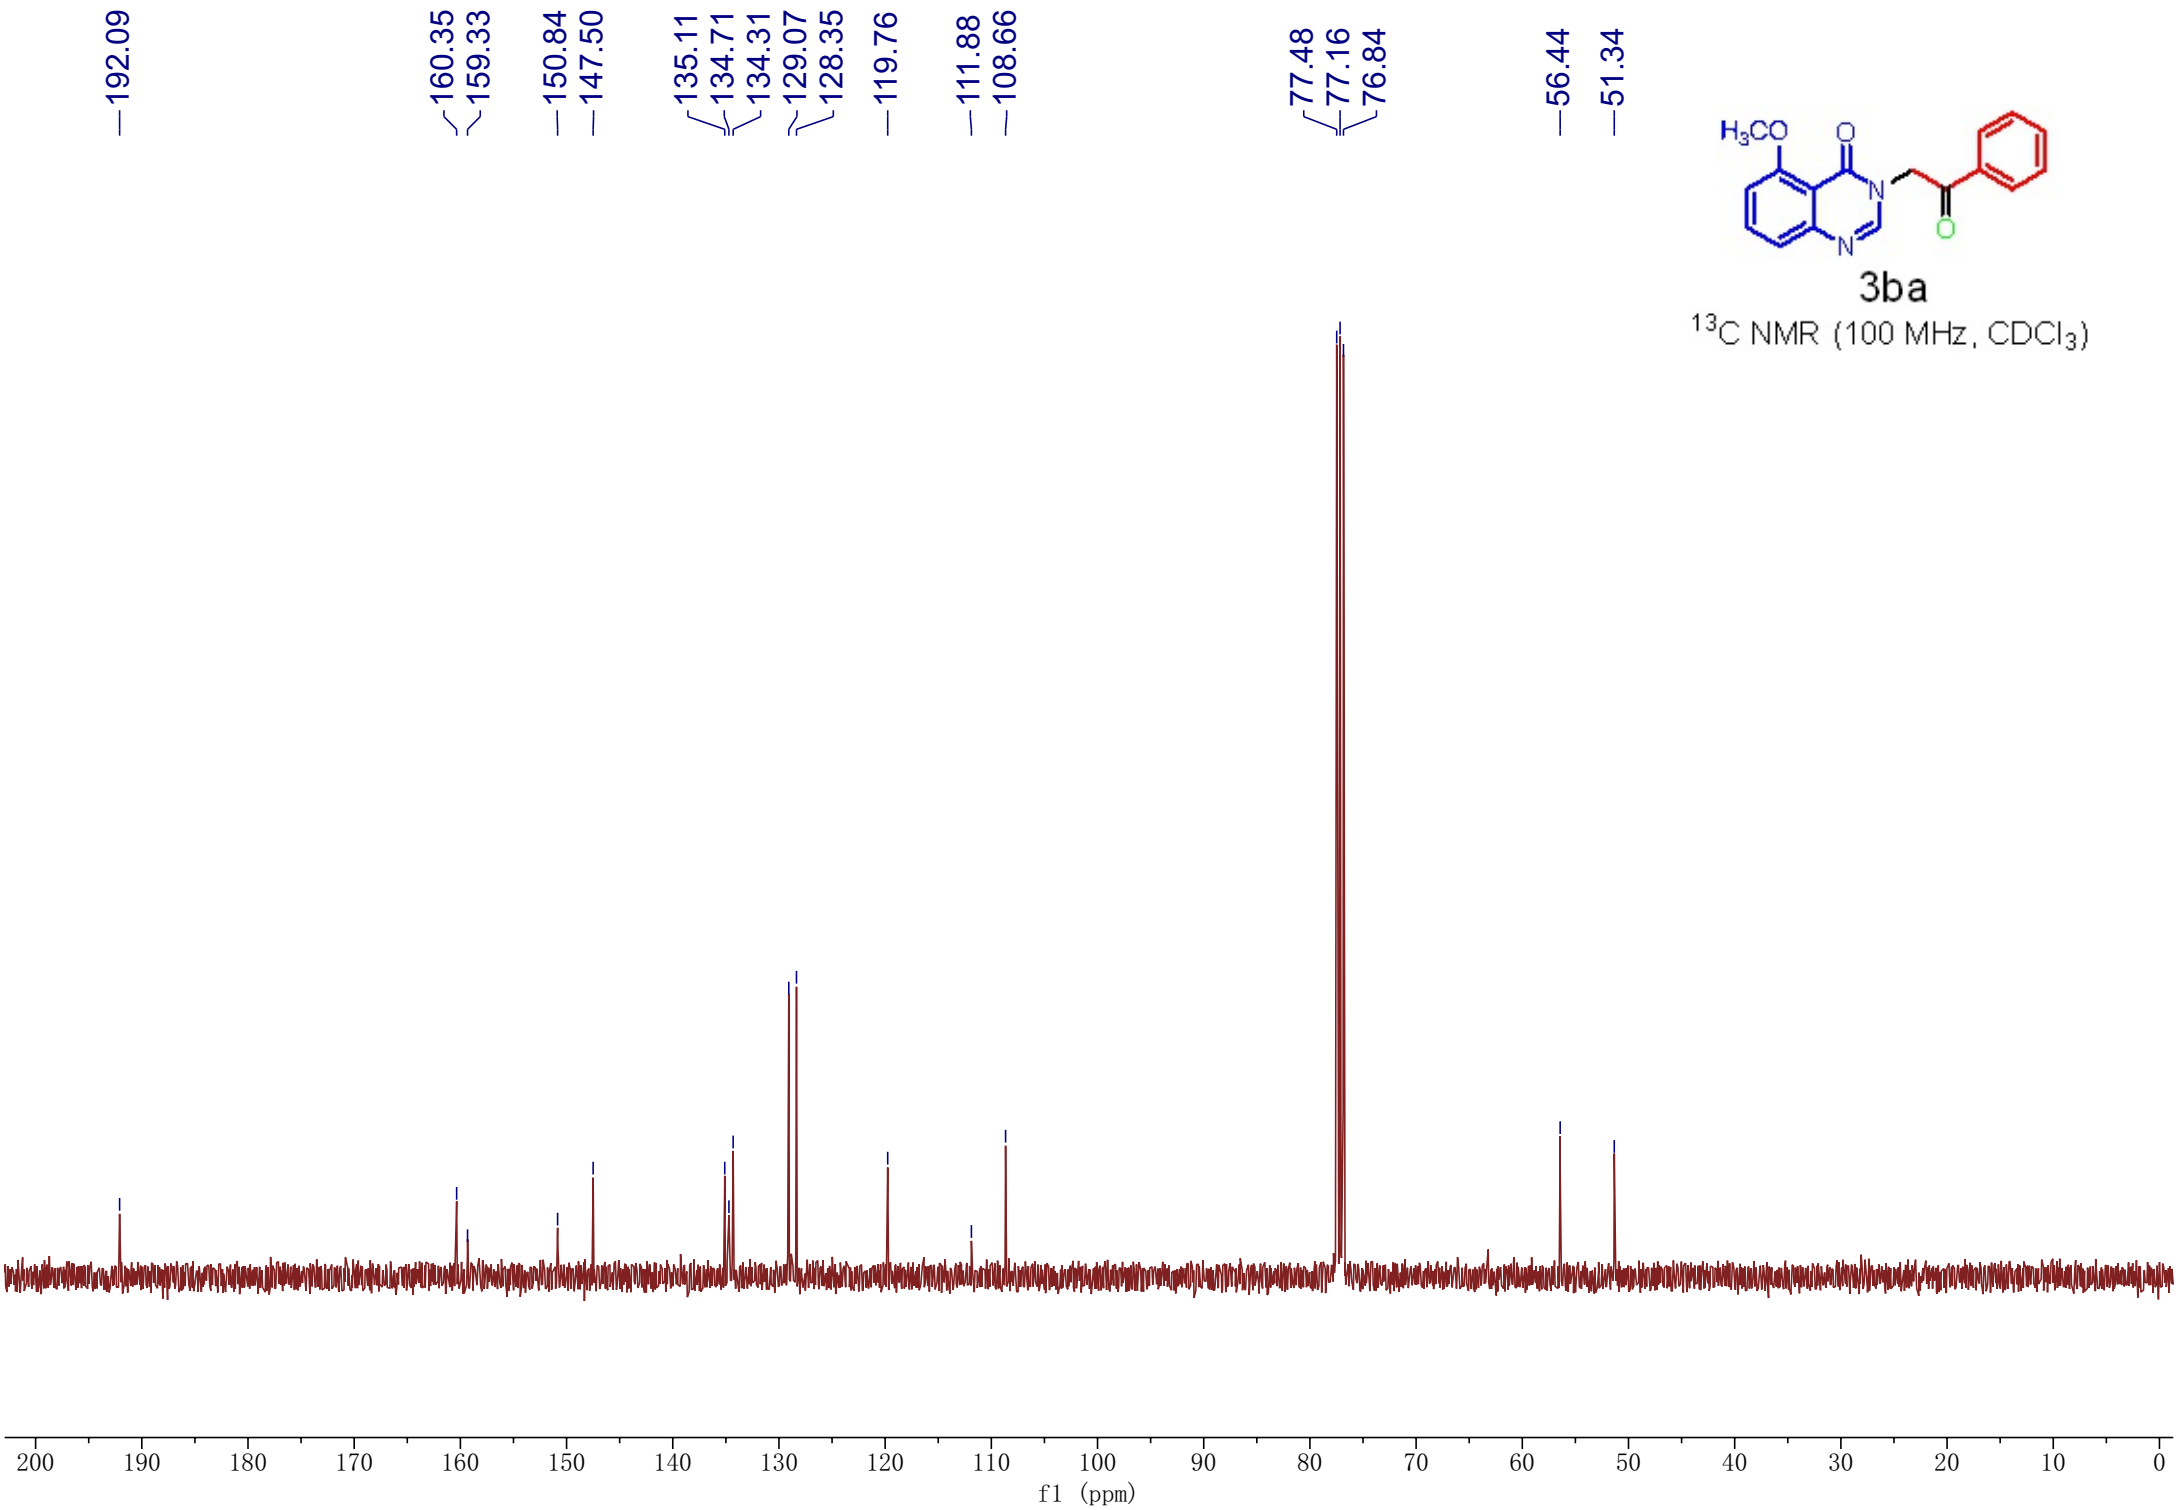

8.406  
8.106  
8.103  
8.099  
8.085  
8.082  
7.871  
7.864  
7.850  
7.843  
7.829  
7.766  
7.747  
7.742  
7.732  
7.728  
7.728  
7.639  
7.635  
7.619  
7.600  
7.565  
7.545  
7.545  
7.365  
7.362  
7.343  
7.337  
7.334  
7.316  
7.316

8.406  
8.106  
8.103  
8.099  
8.085  
8.082  
7.871  
7.864  
7.850  
7.843  
7.766  
7.747  
7.732  
7.728  
7.639  
7.635  
7.619  
7.600  
7.565  
7.545  
7.365  
7.362  
7.343  
7.337  
7.334  
7.316

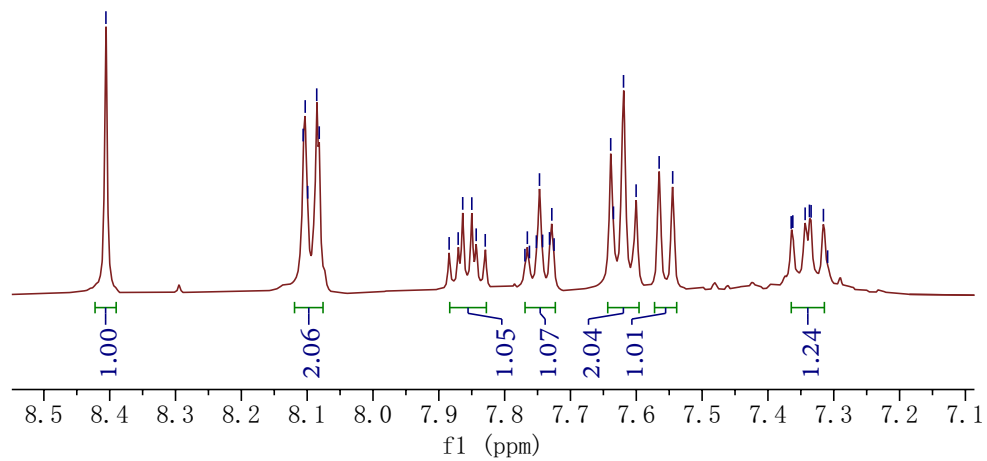

2.509  
2.505  
2.500  
2.495  
2.491

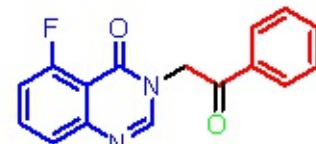

3ca

<sup>1</sup>H NMR (400 MHz, DMSO-*d*<sub>6</sub>)

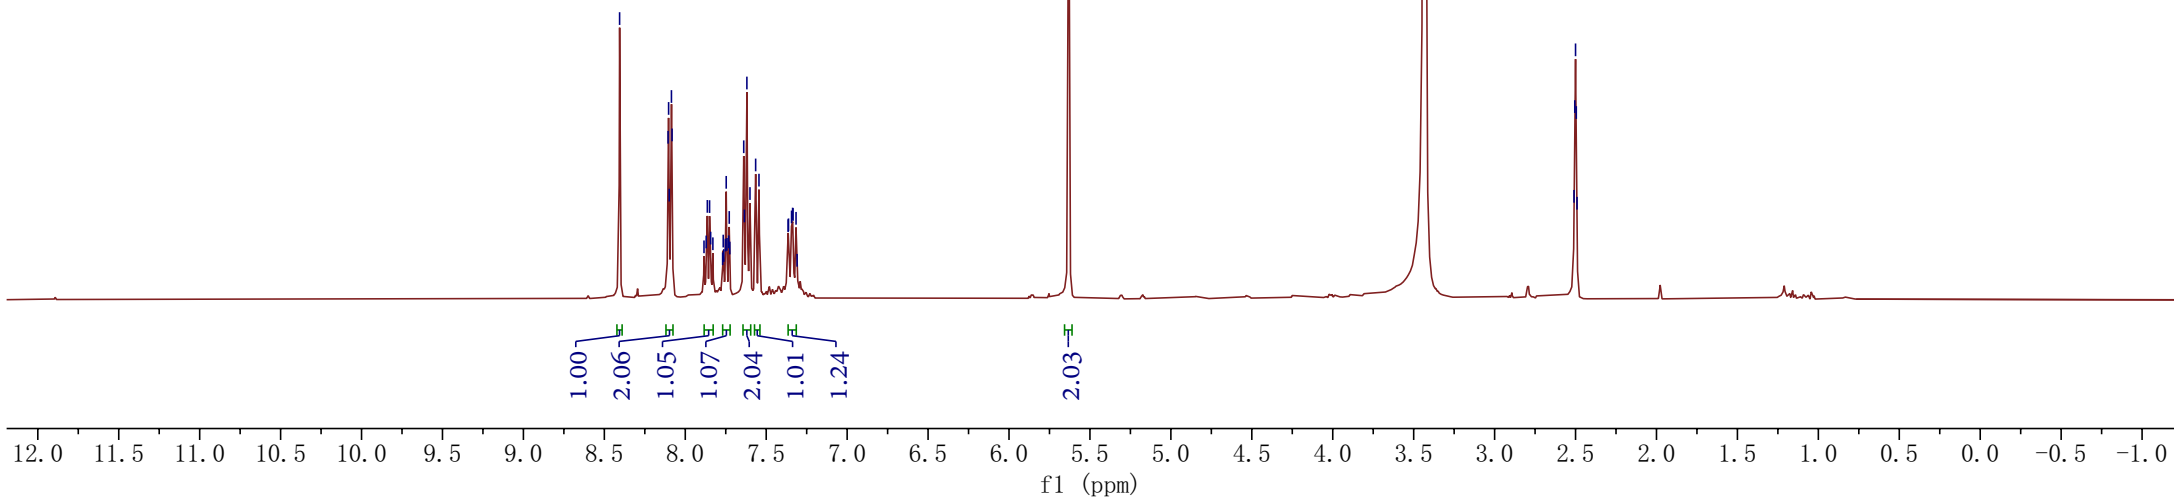

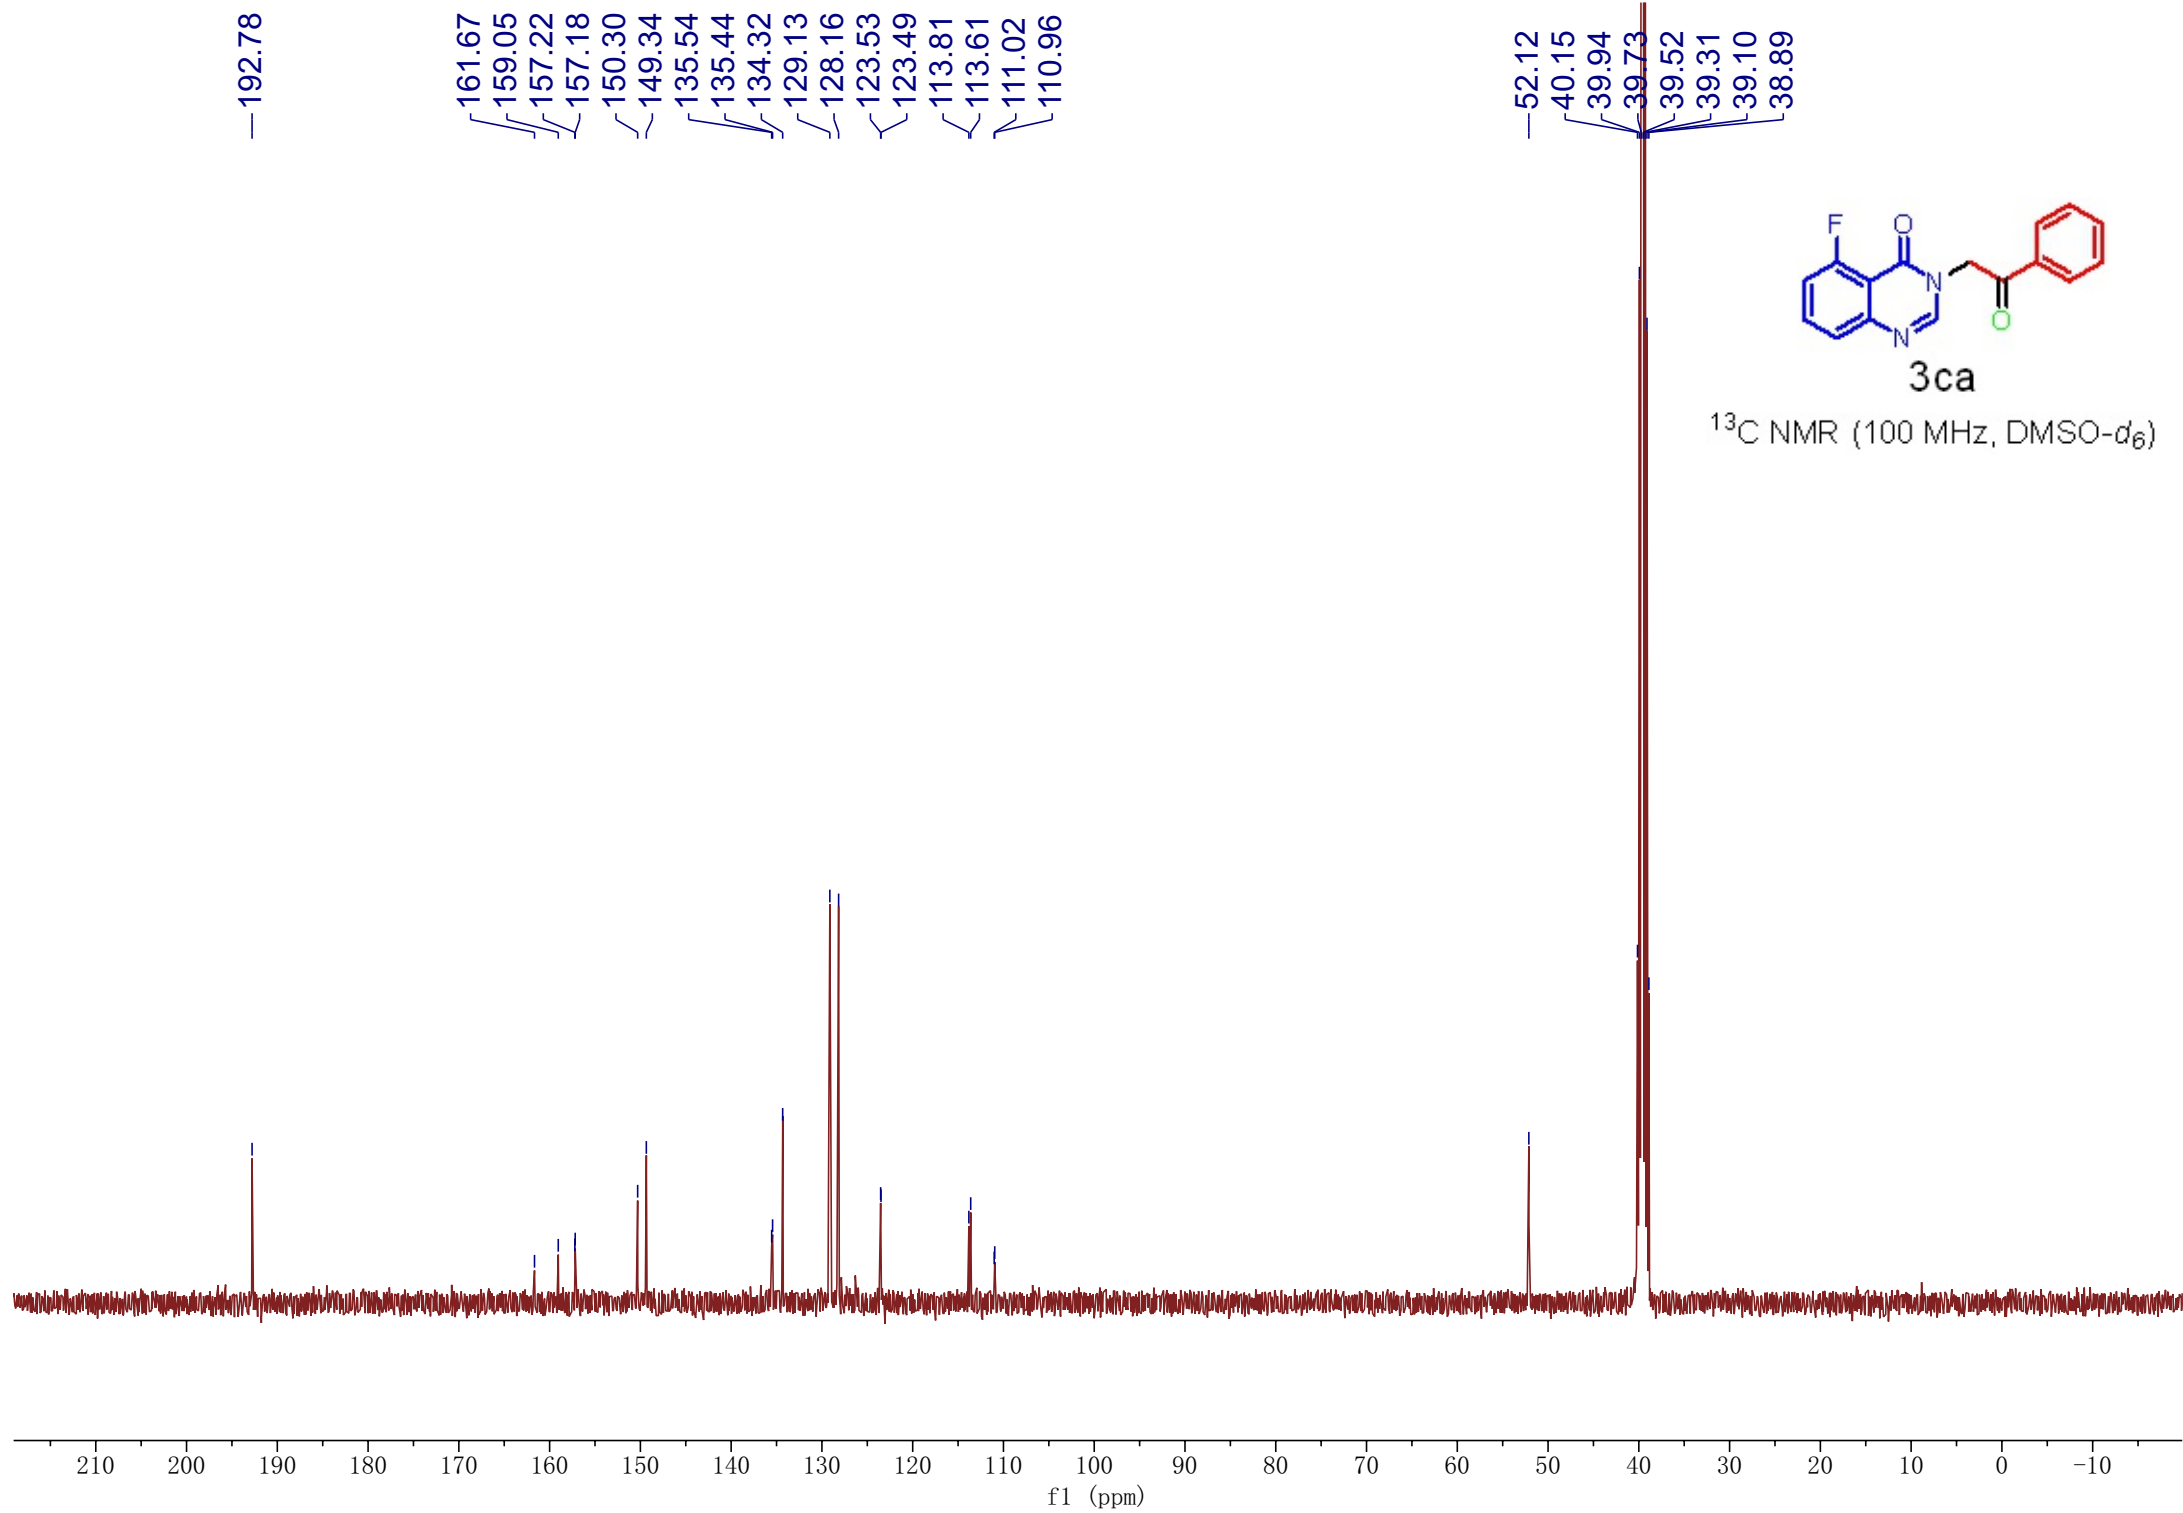

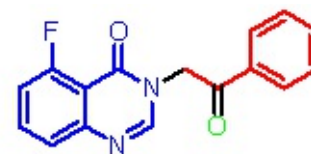

3ca

$^{19}\text{F}$  NMR (376 MHz,  $\text{DMSO-}d_6$ )

--110.619

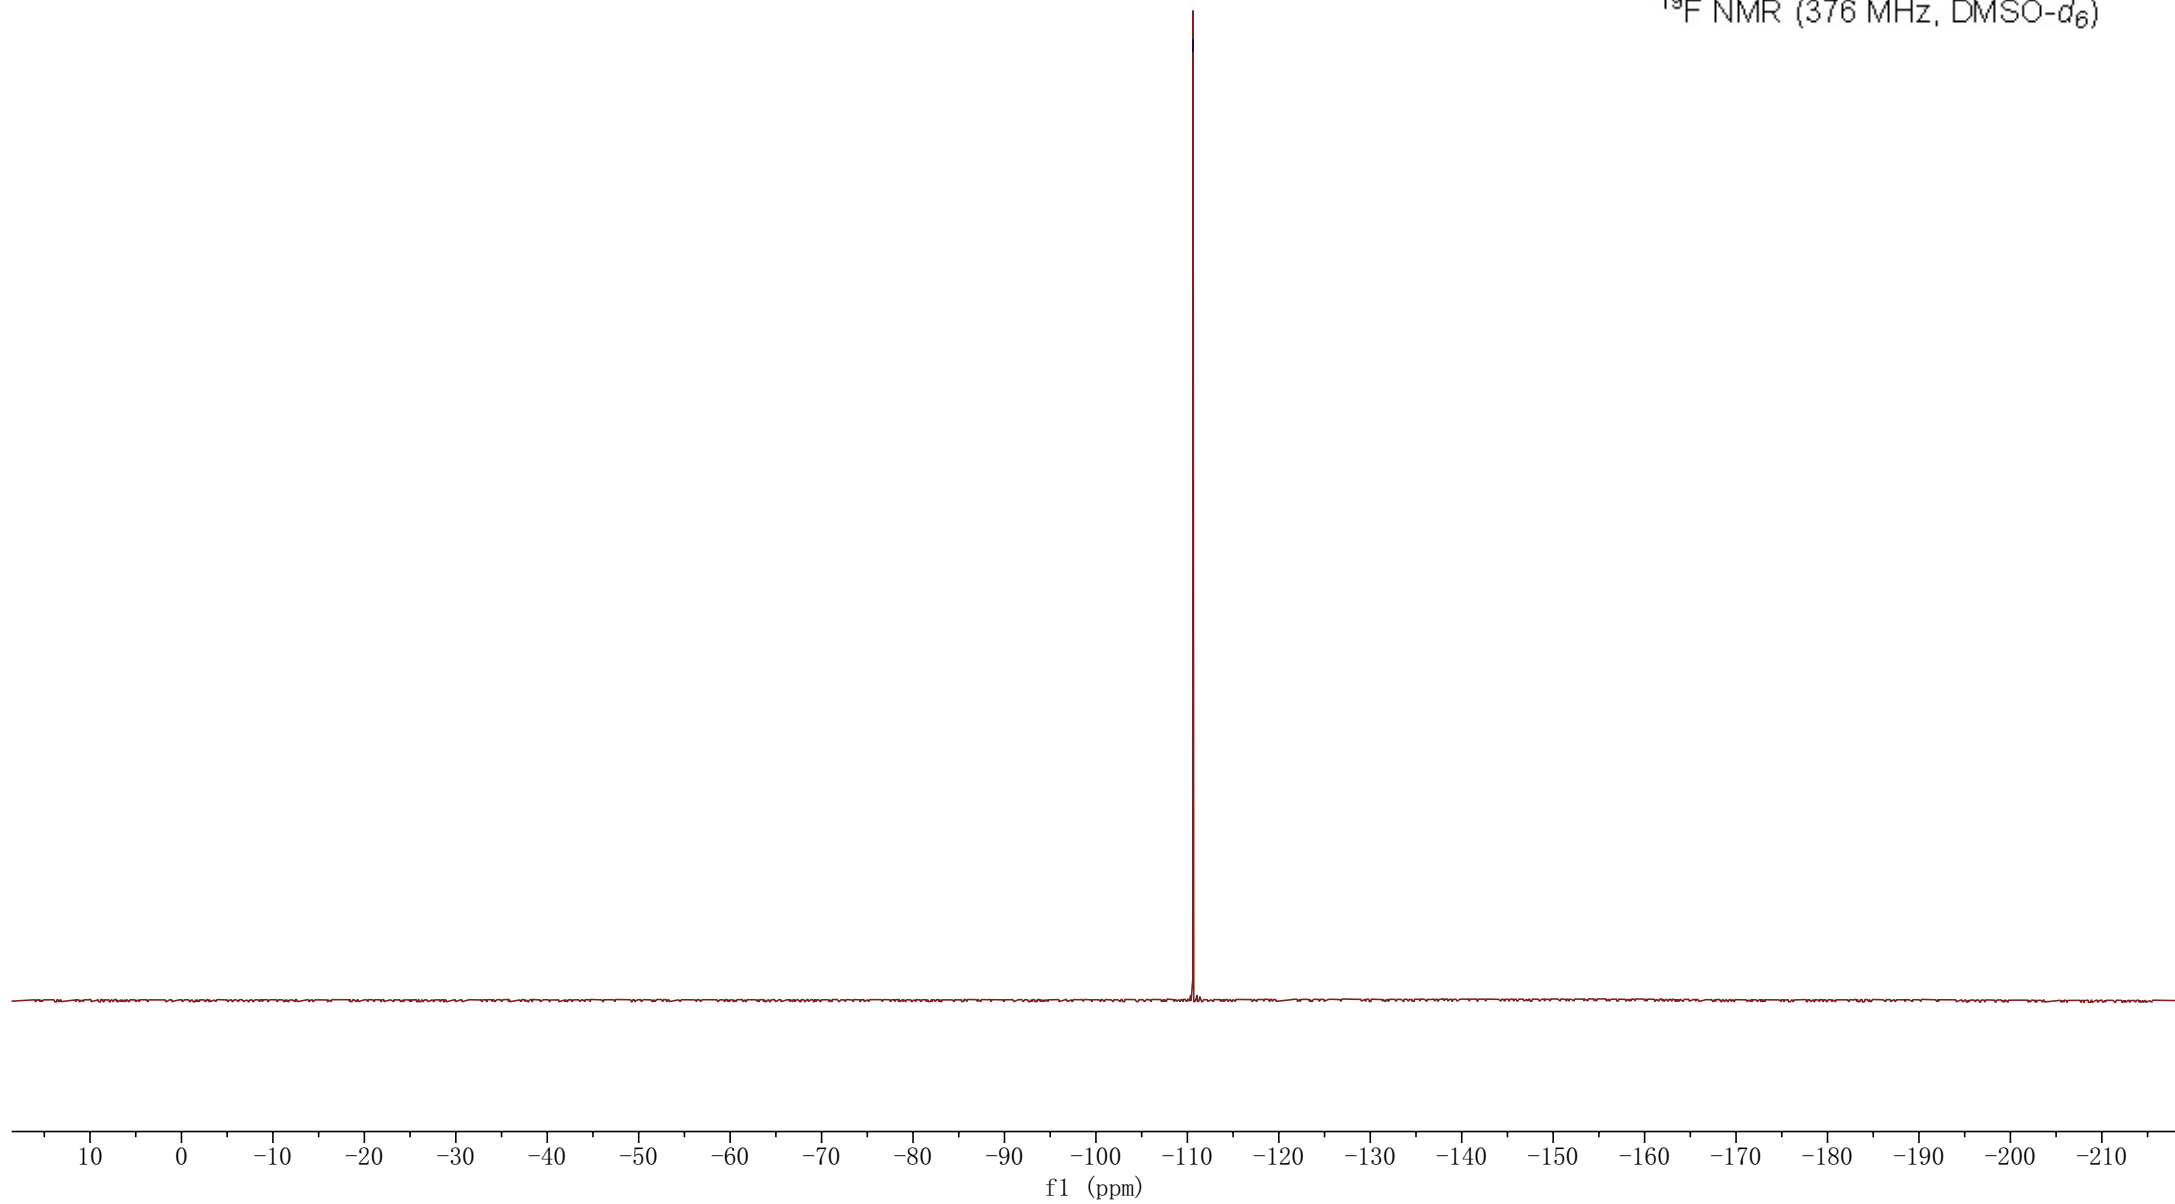

8.020  
8.015  
8.012  
8.009  
8.008  
8.008  
7.999  
7.994  
7.991  
7.985  
7.733  
7.730  
7.714  
7.711  
7.681  
7.678  
7.660  
7.657  
7.646  
7.643  
7.629  
7.624  
7.620  
7.609  
7.606  
7.602  
7.532  
7.512  
7.504  
7.493  
7.478  
7.474  
7.399

8.015  
8.012  
8.009  
8.008  
7.999  
7.994  
7.991  
7.985  
7.733  
7.730  
7.714  
7.711  
7.681  
7.678  
7.660  
7.657  
7.643  
7.624  
7.609  
7.606  
7.532  
7.512  
7.493  
7.478  
7.474

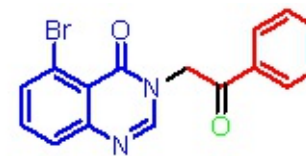

3da

<sup>1</sup>H NMR (400 MHz, CDCl<sub>3</sub>)

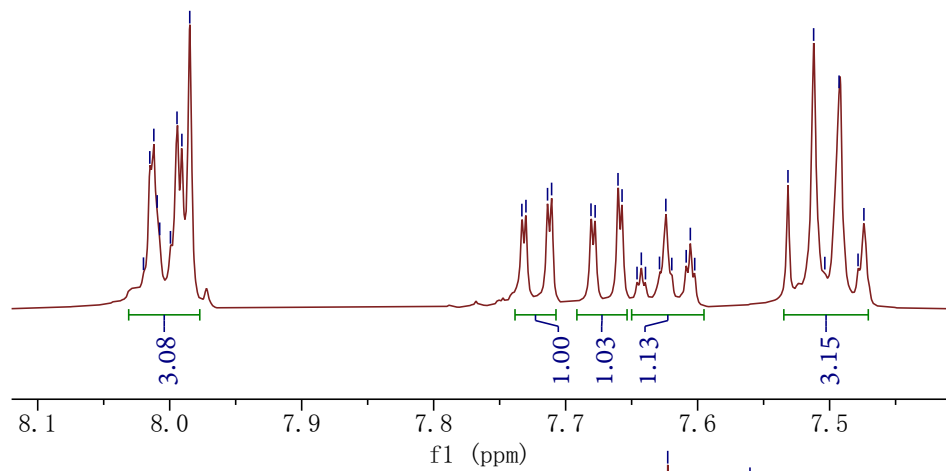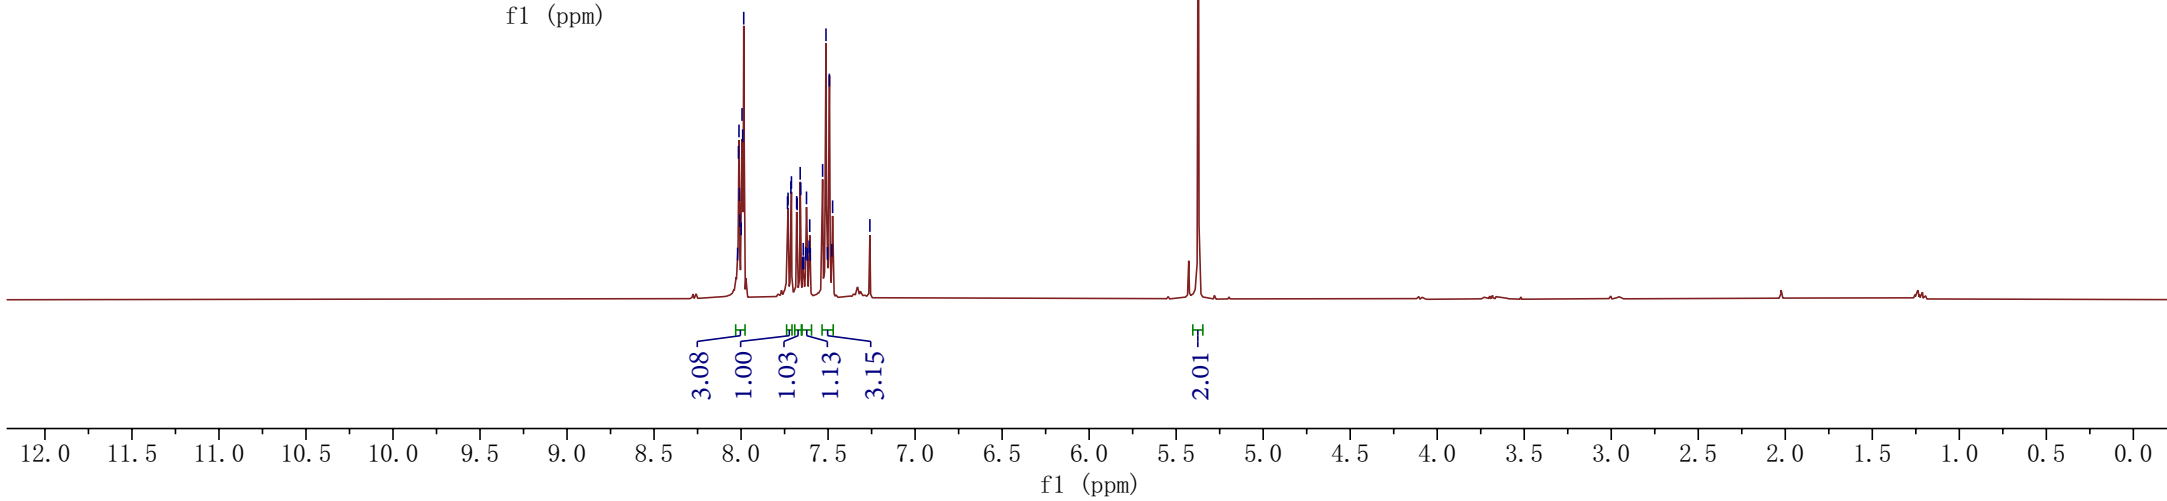

—191.64

—159.25

—150.58

—147.28

134.47

134.35

134.28

134.06

129.09

128.28

127.84

121.52

120.24

77.48

77.16

76.84

—51.68

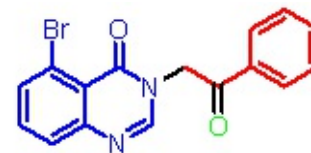

3da

<sup>13</sup>C NMR (100 MHz, CDCl<sub>3</sub>)

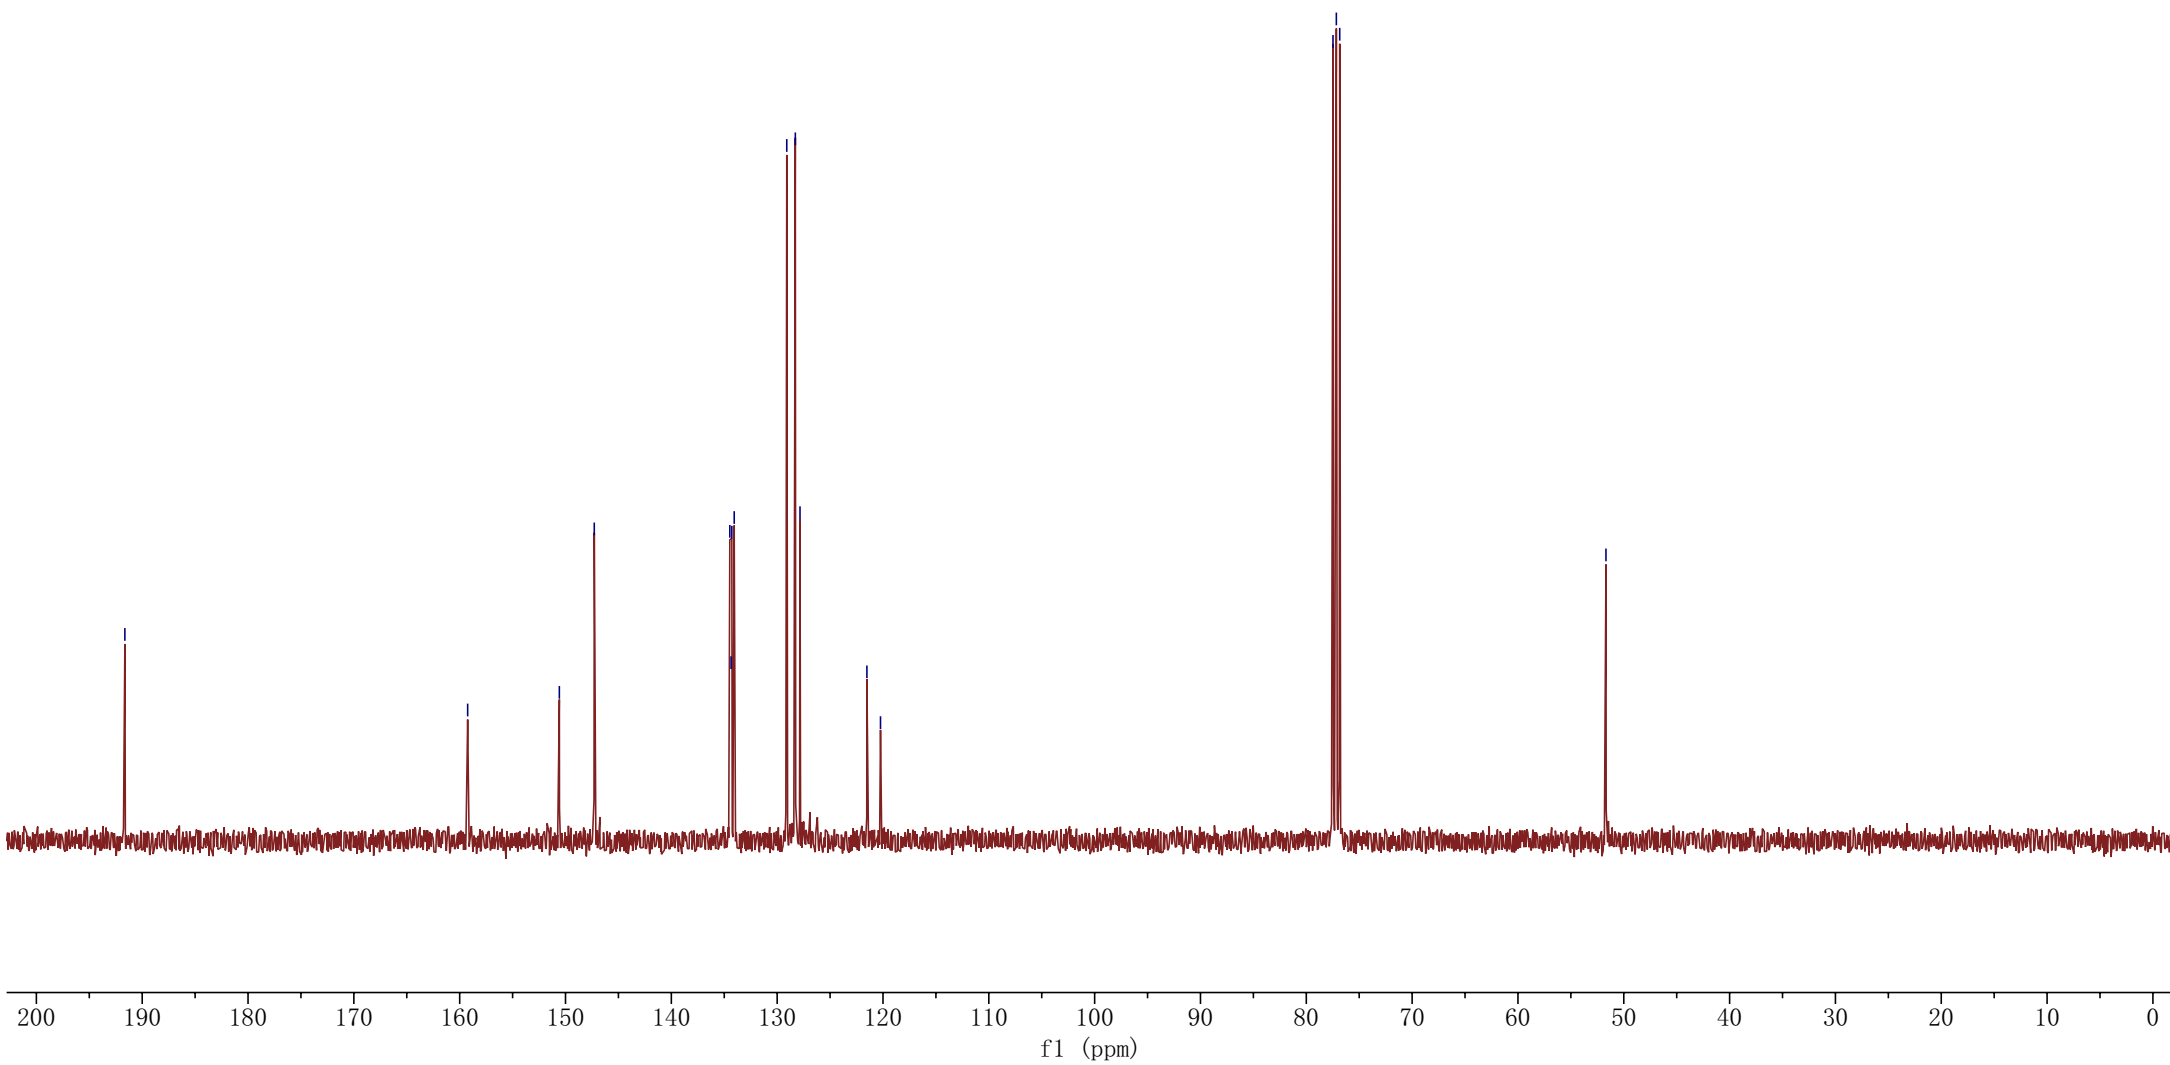

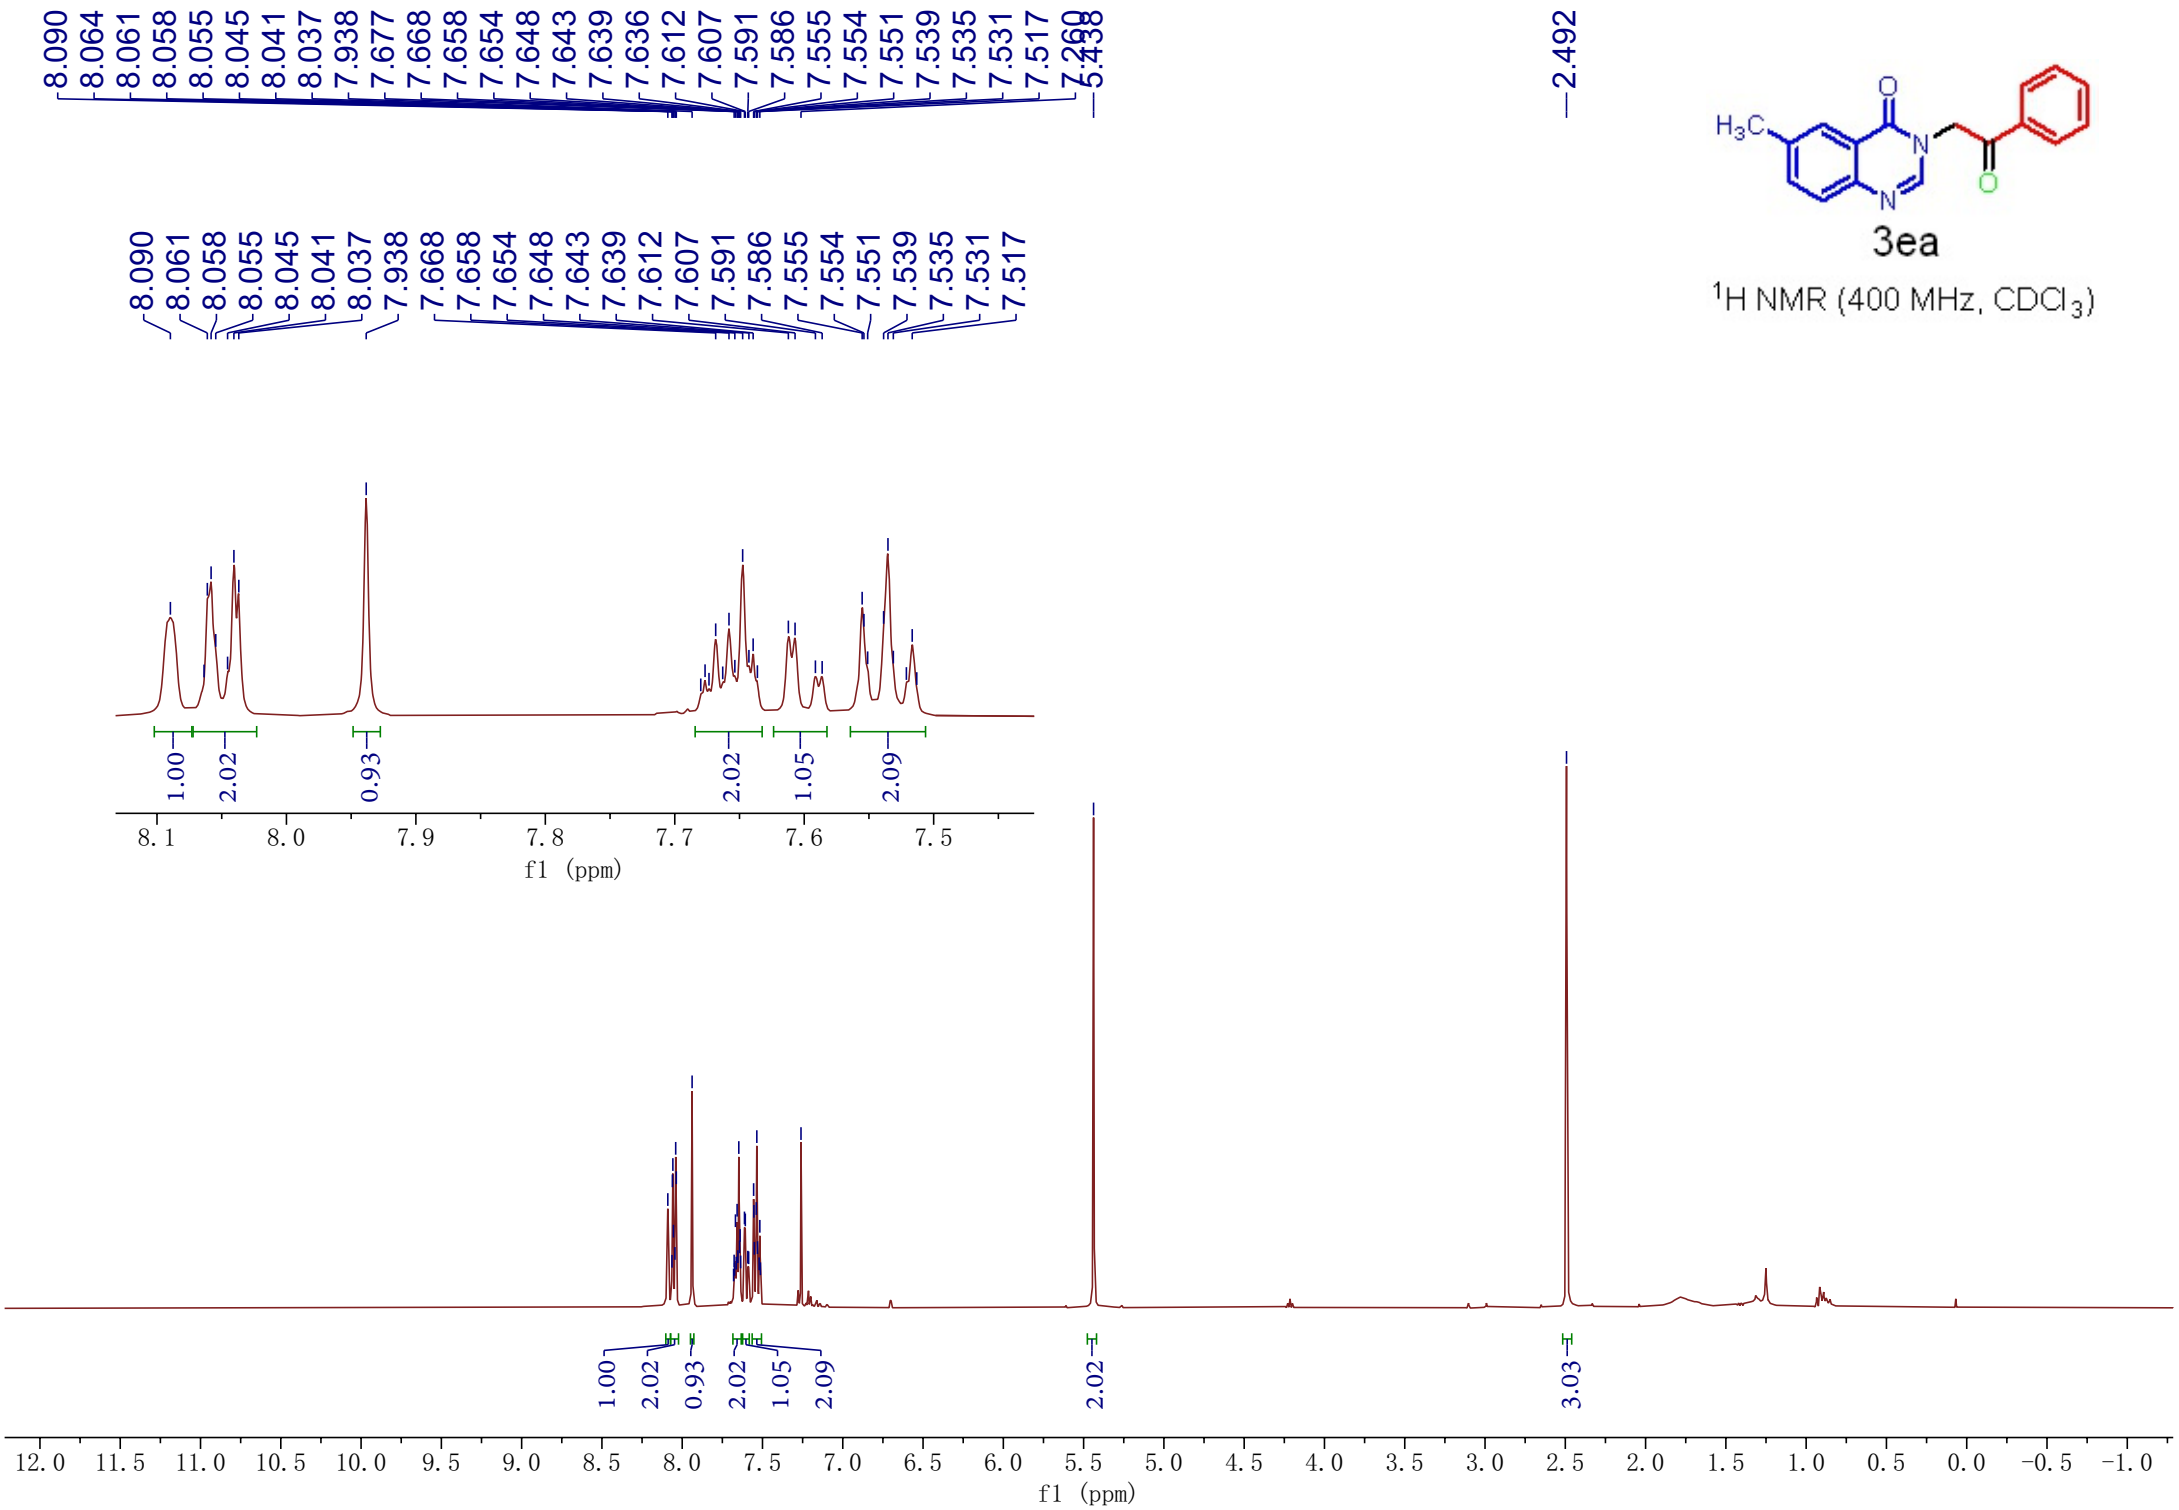

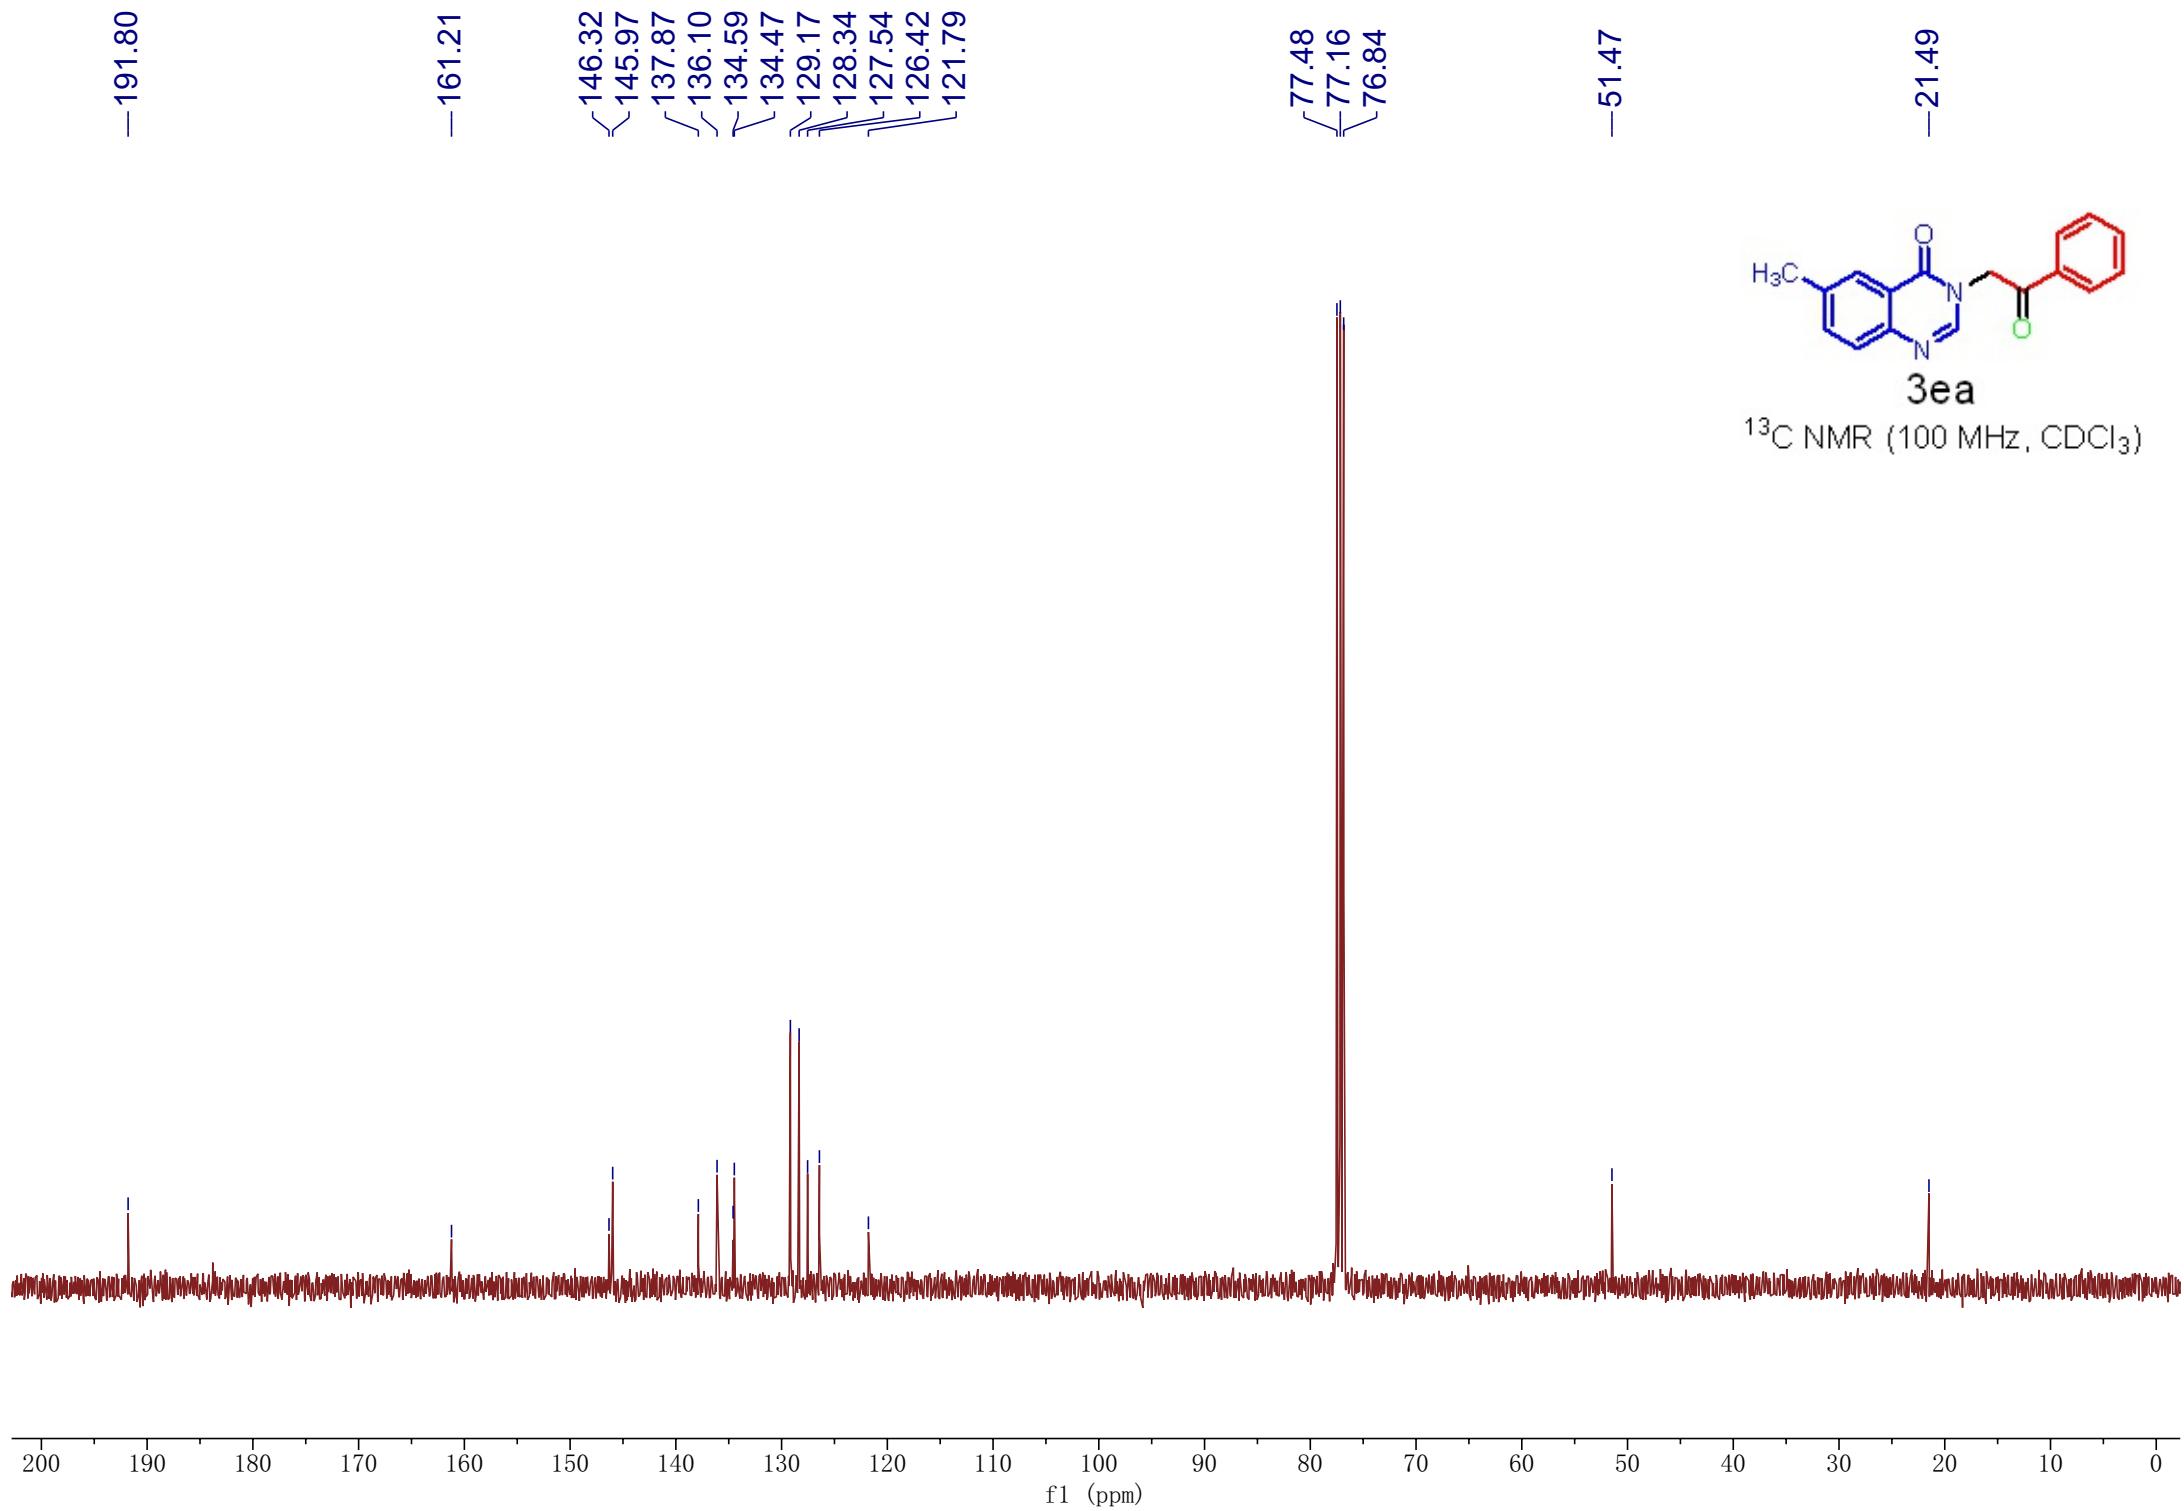



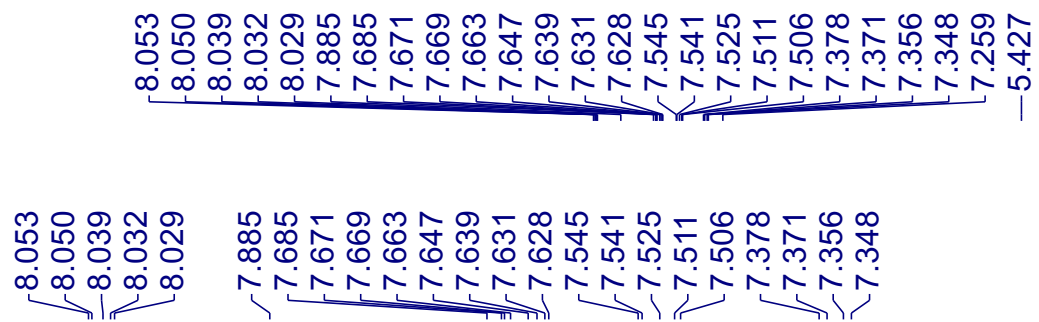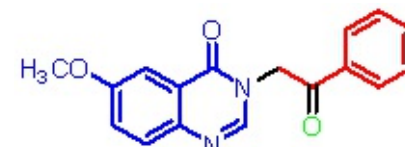

3fa

<sup>1</sup>H NMR (400 MHz, CDCl<sub>3</sub>)

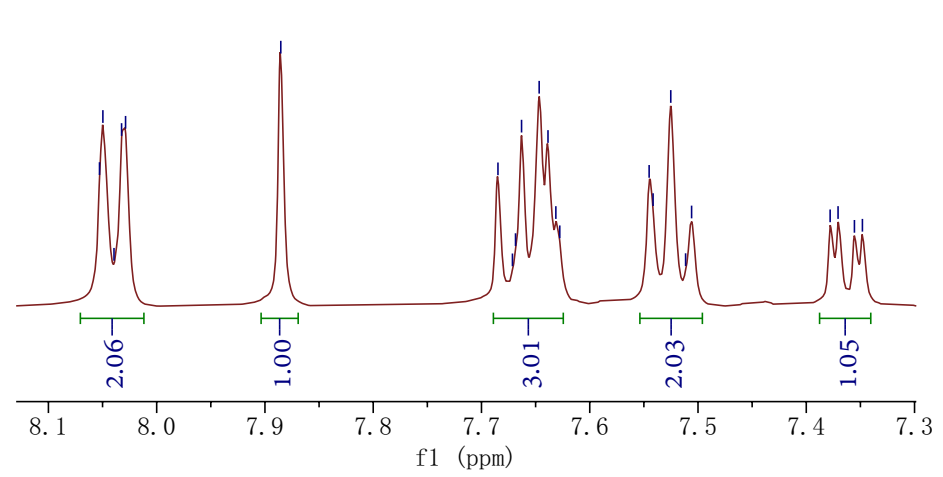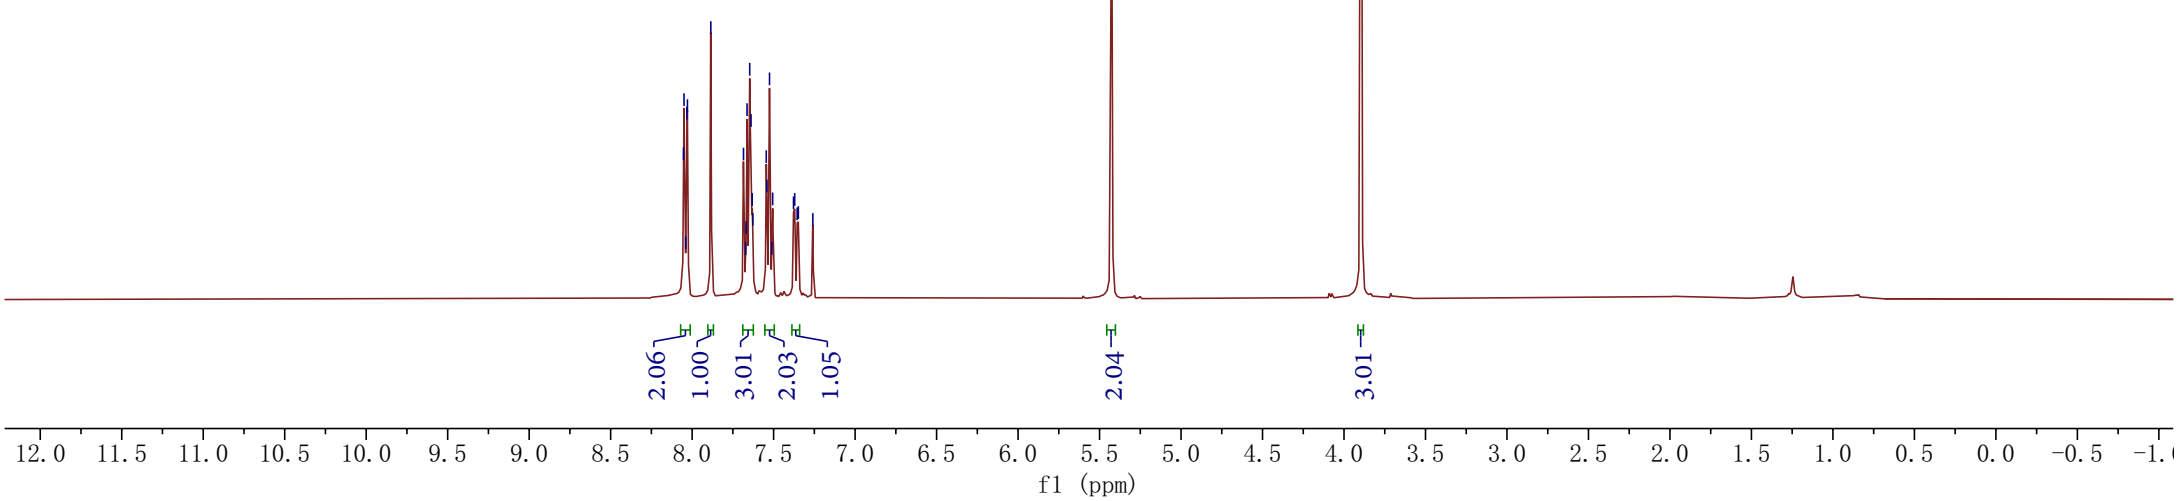

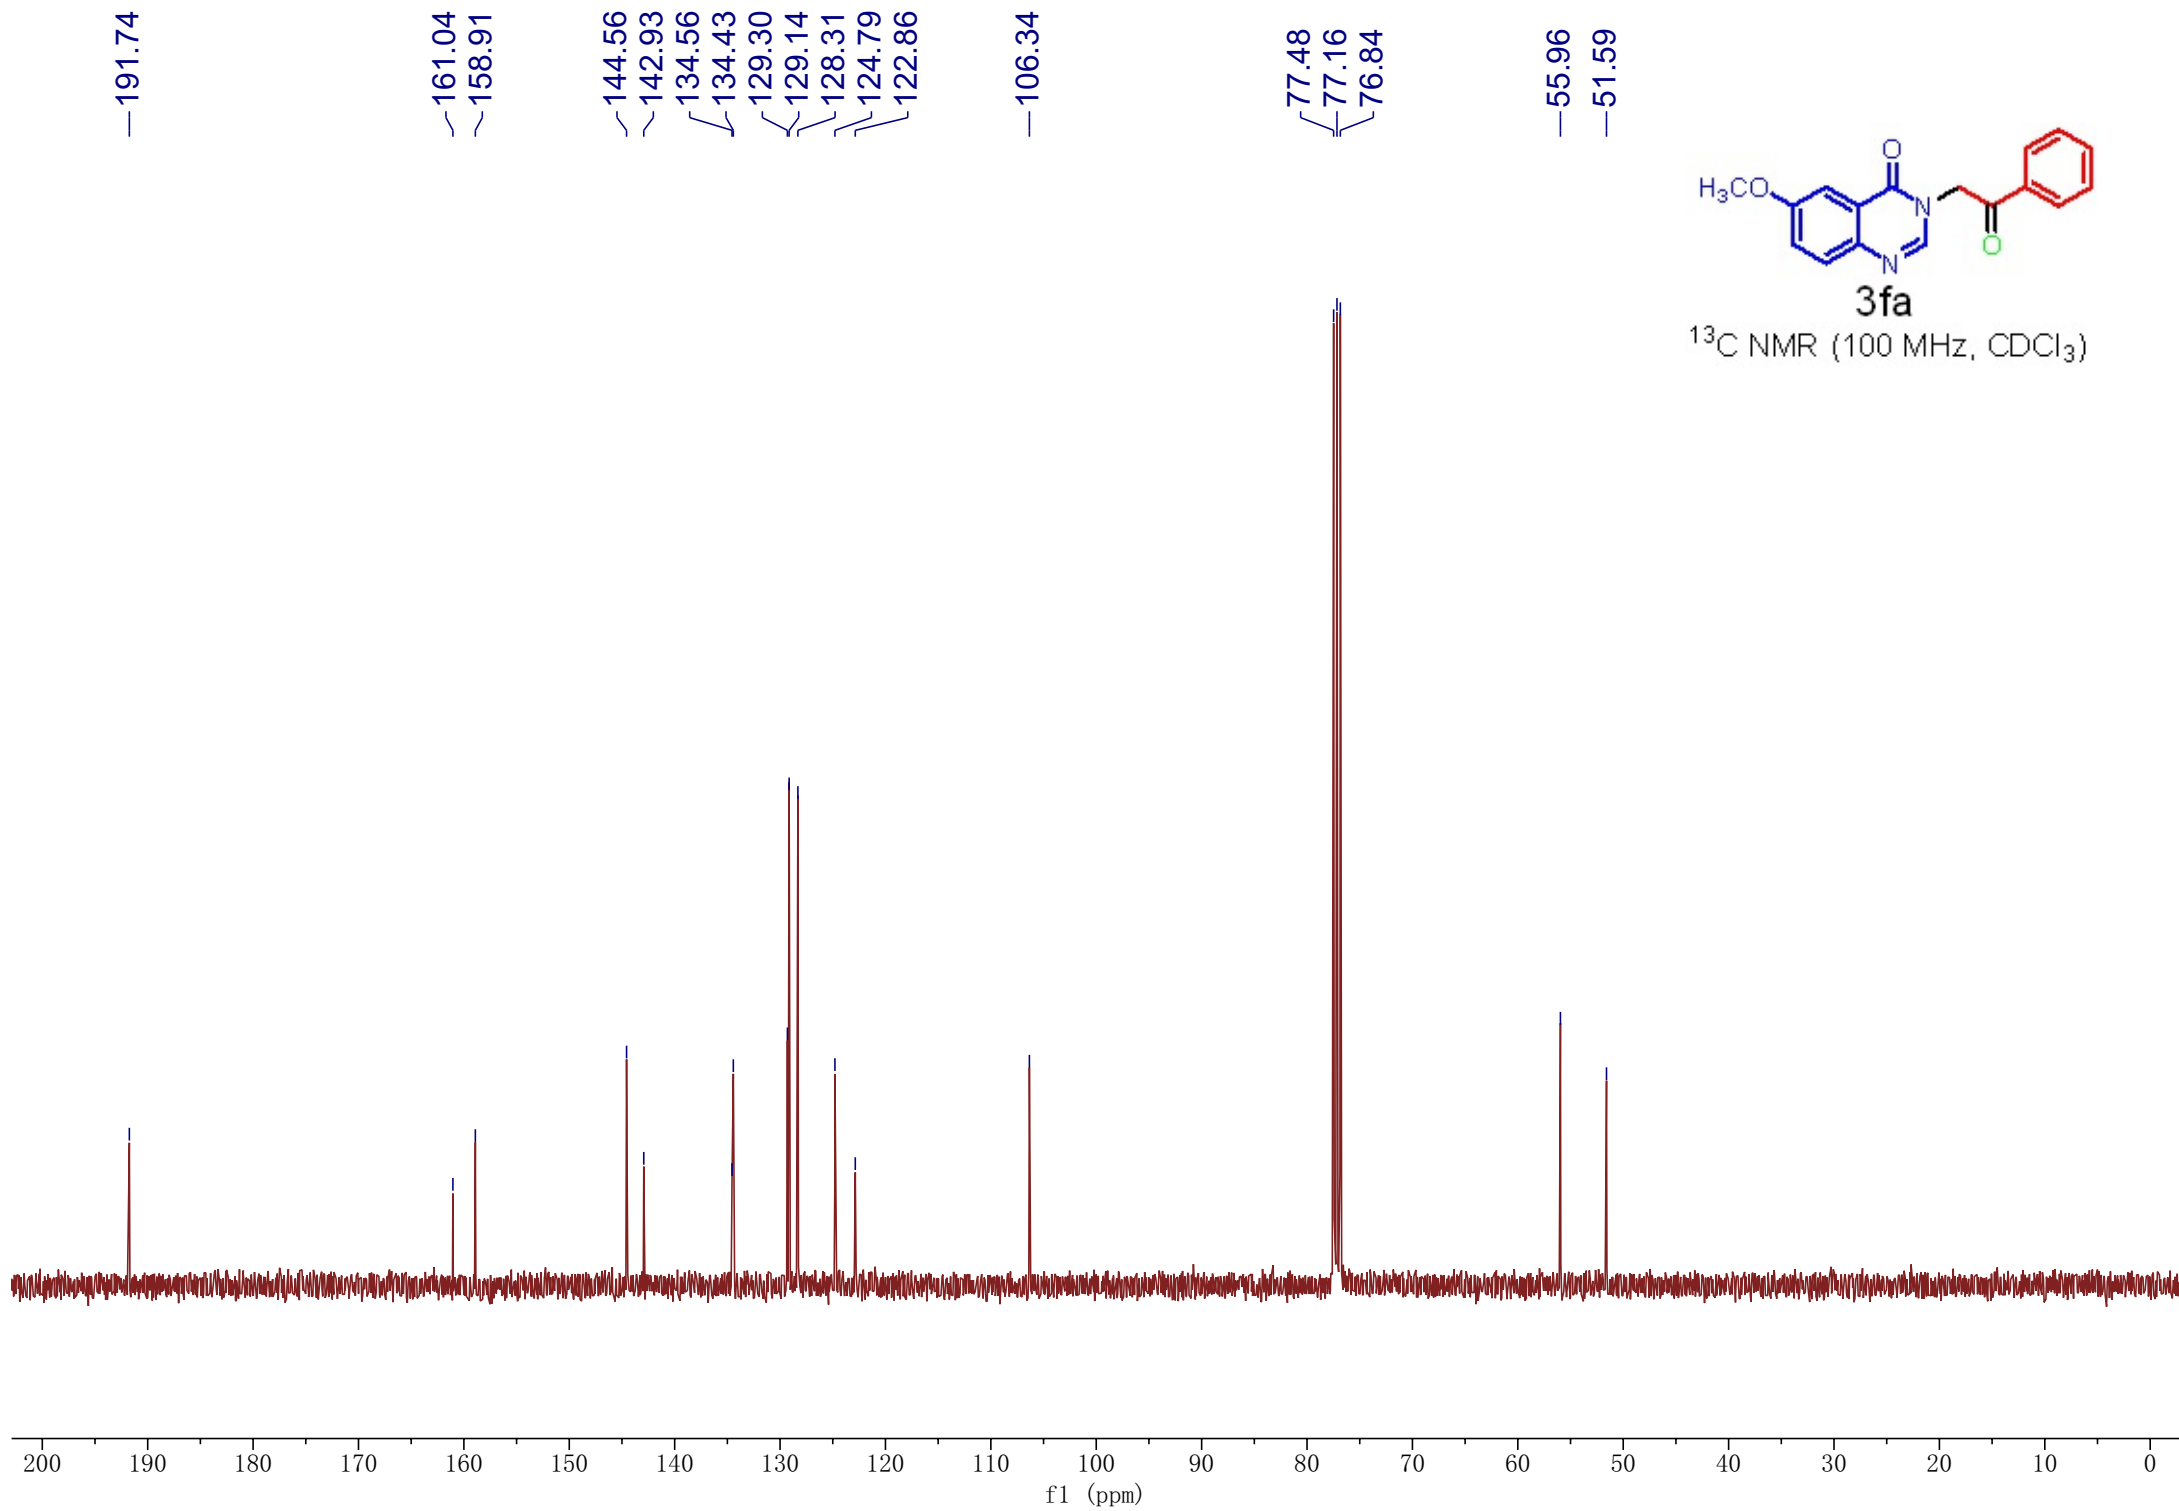

8.049  
8.045  
8.042  
8.033  
8.028  
8.024  
7.945  
7.928  
7.920  
7.907  
7.899  
7.781  
7.769  
7.759  
7.759  
7.746  
7.746  
7.661  
7.642  
7.642  
7.553  
7.550  
7.533  
7.533  
7.529  
7.529  
7.524  
7.519  
7.515  
7.504  
7.502  
7.502  
7.496  
7.494  
7.442  
7.442

8.049  
8.045  
8.042  
8.028  
8.024  
7.945  
7.928  
7.920  
7.907  
7.899  
7.781  
7.769  
7.759  
7.746  
7.661  
7.642  
7.553  
7.550  
7.533  
7.529  
7.524  
7.519  
7.515  
7.504  
7.502  
7.496

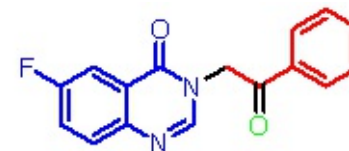

3ga

<sup>1</sup>H NMR (400 MHz, CDCl<sub>3</sub>)

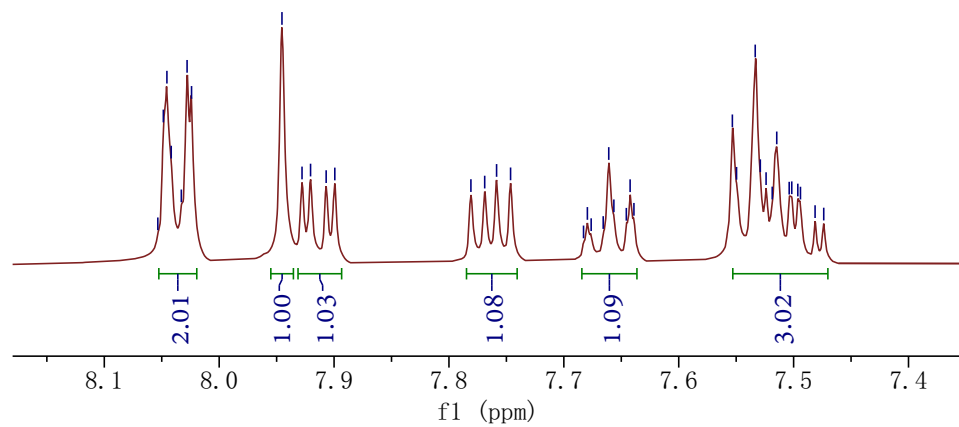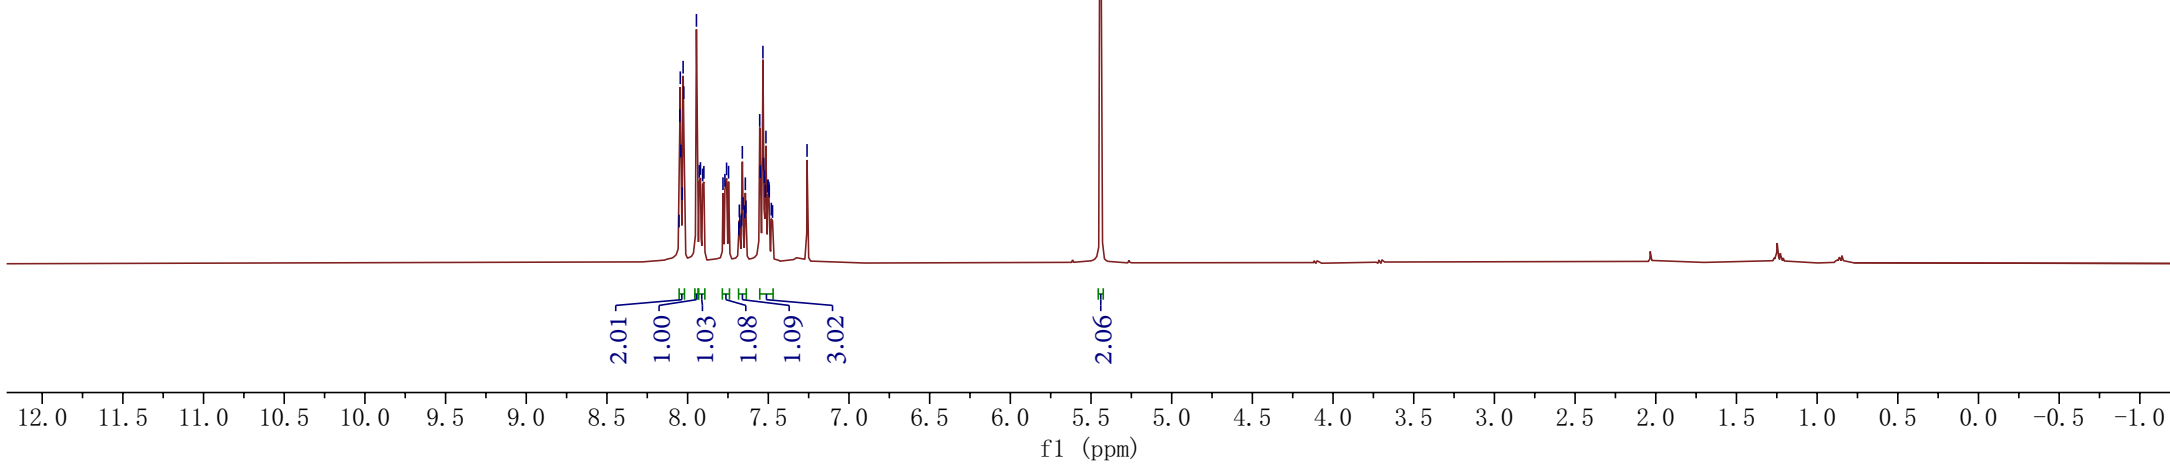

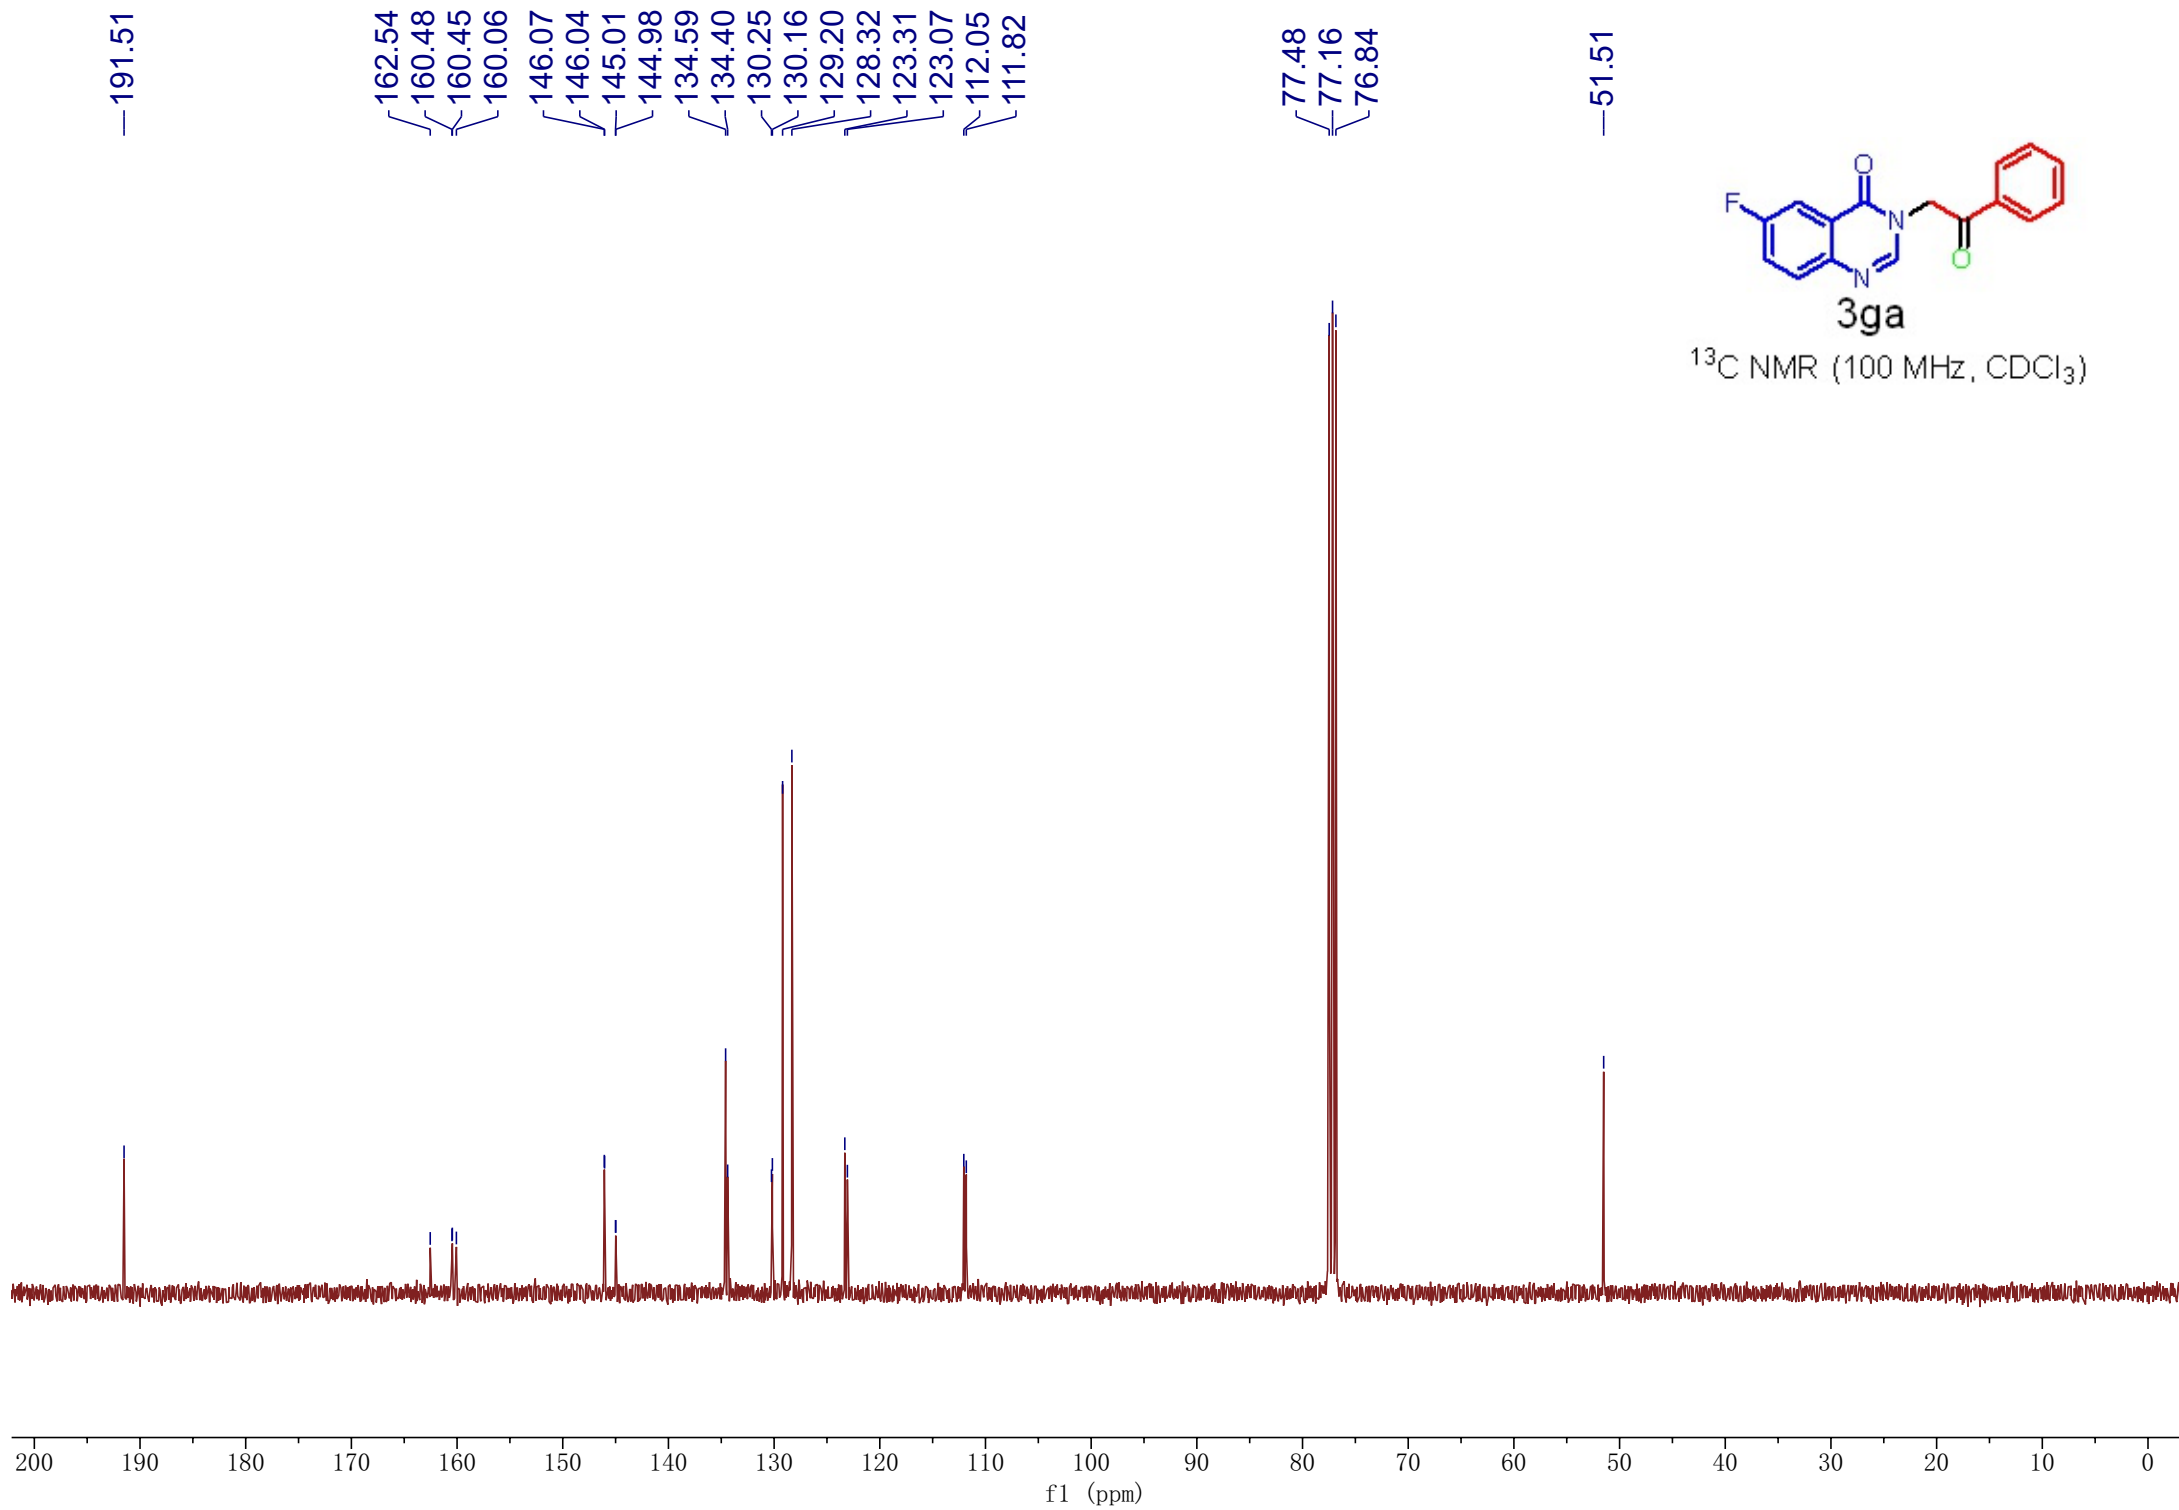

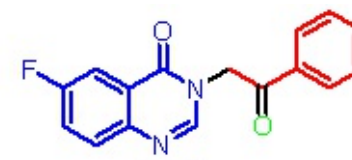

3ga

$^{19}\text{F}$  NMR (376 MHz,  $\text{CDCl}_3$ )

--111.629

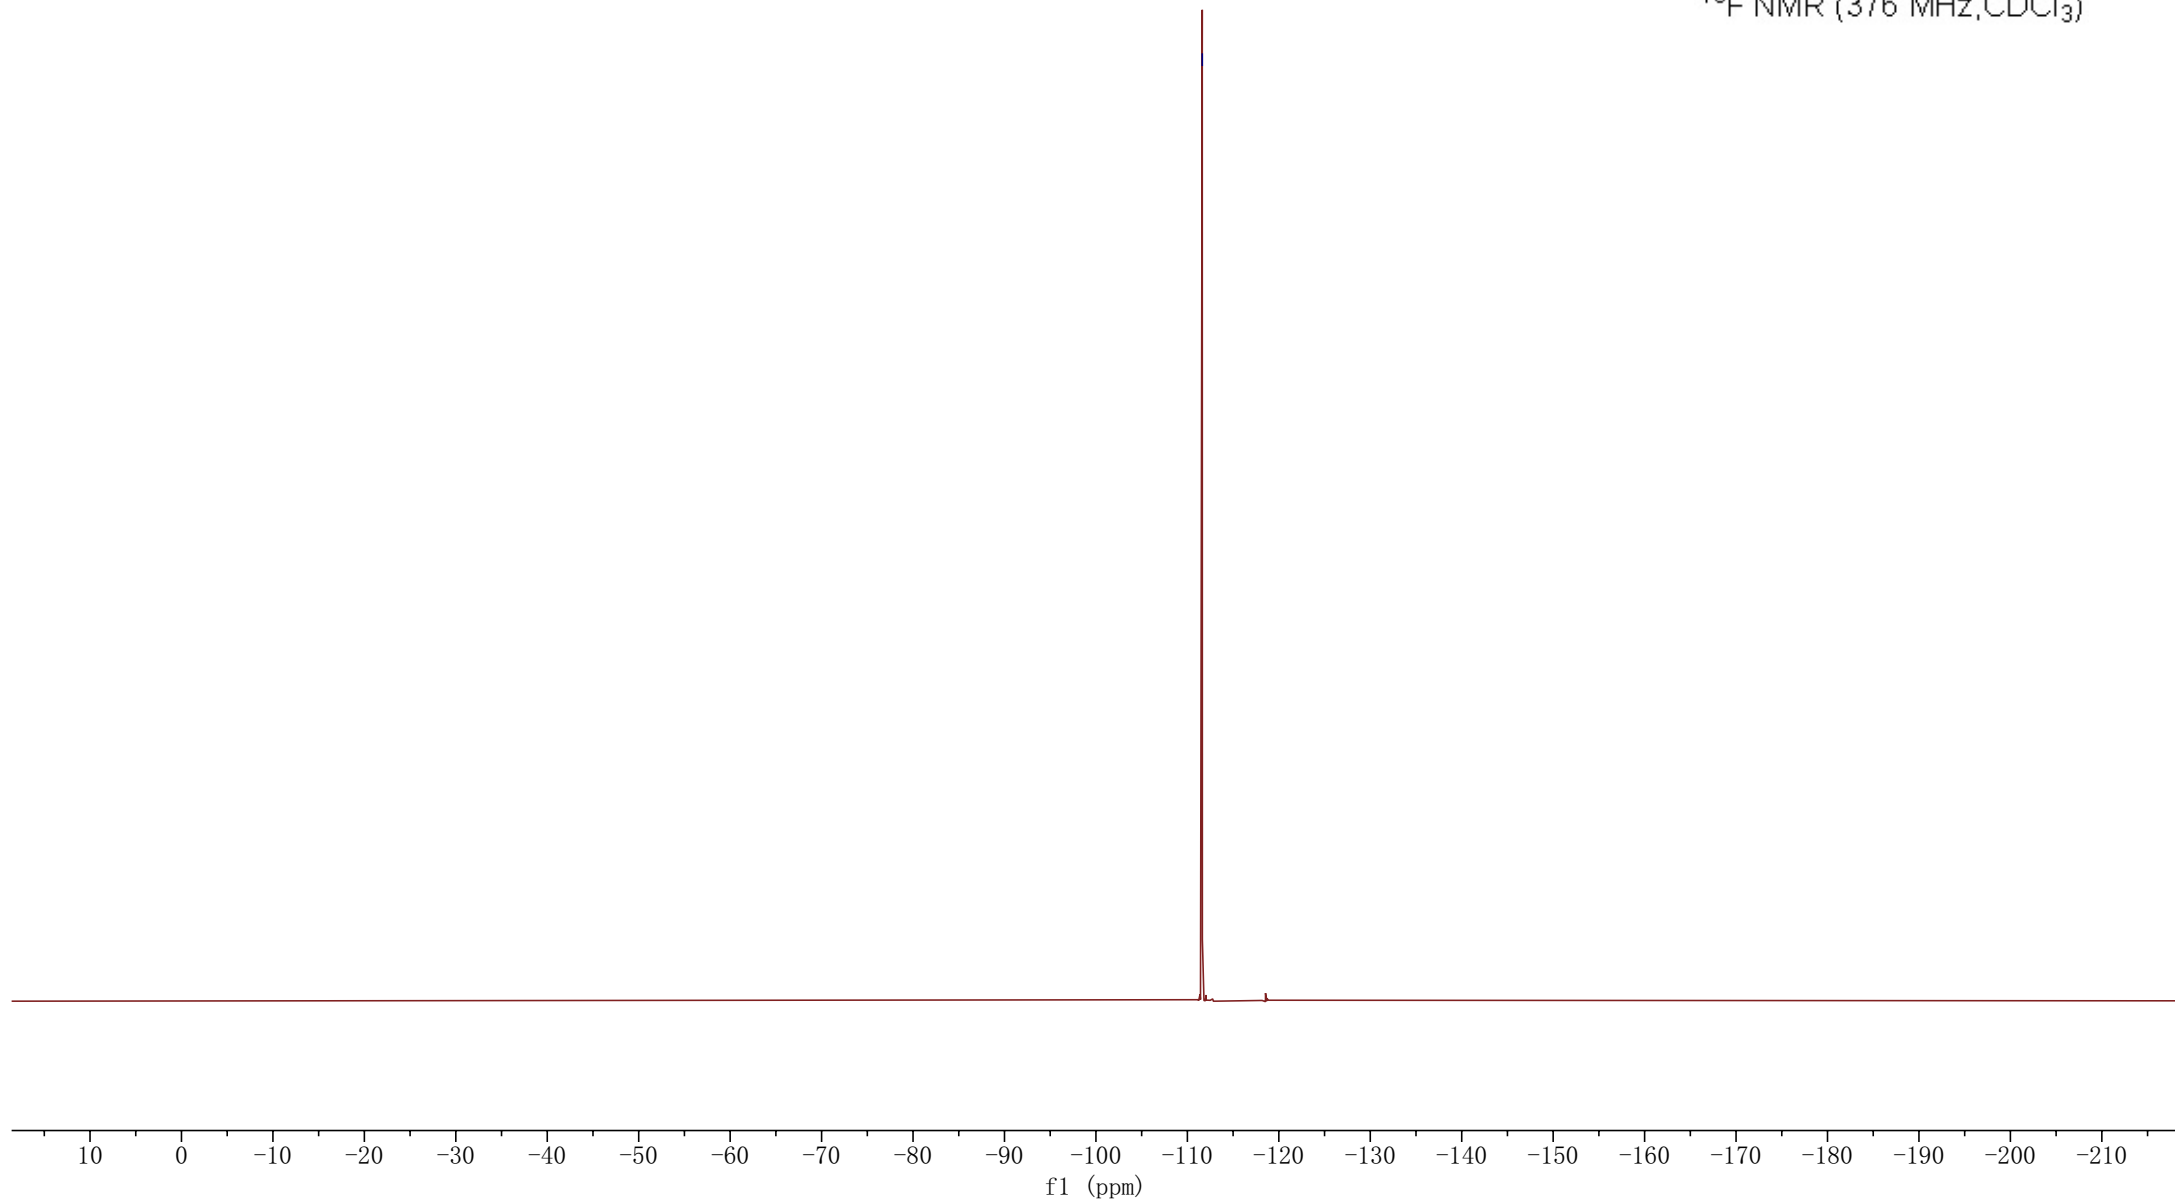

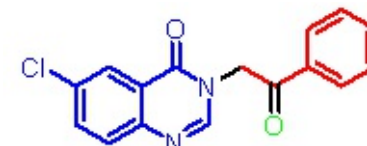

3ha

<sup>1</sup>H NMR (400 MHz, CDCl<sub>3</sub>)

8.201  
8.179  
8.025  
8.021  
8.004  
8.000  
7.989  
7.741  
7.736  
7.663  
7.645  
7.629  
7.626  
7.623  
7.533  
7.514  
7.499  
7.494  
7.454  
7.449  
7.433  
7.428  
7.260  
-5.419

8.201  
8.179  
8.025  
8.021  
8.004  
8.000  
7.989  
7.741  
7.736  
7.663  
7.645  
7.629  
7.626  
7.623  
7.533  
7.514  
7.494  
7.454  
7.449  
7.433  
7.428

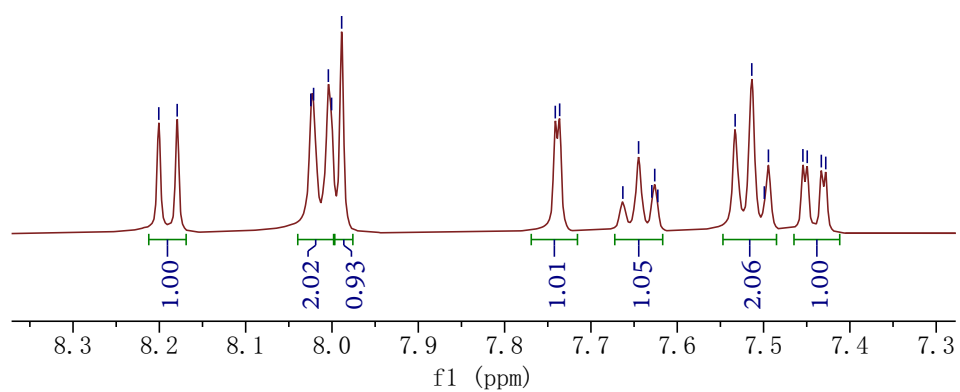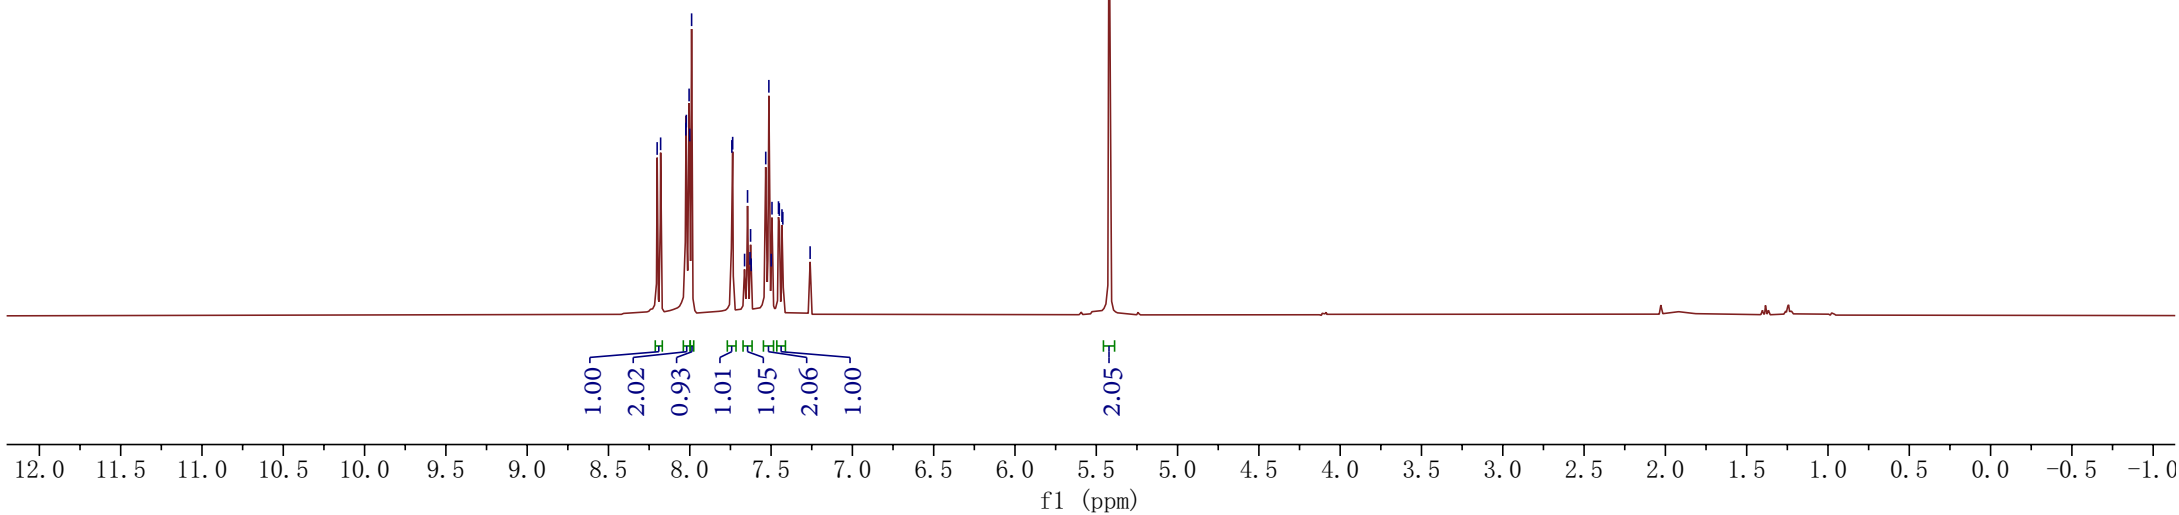

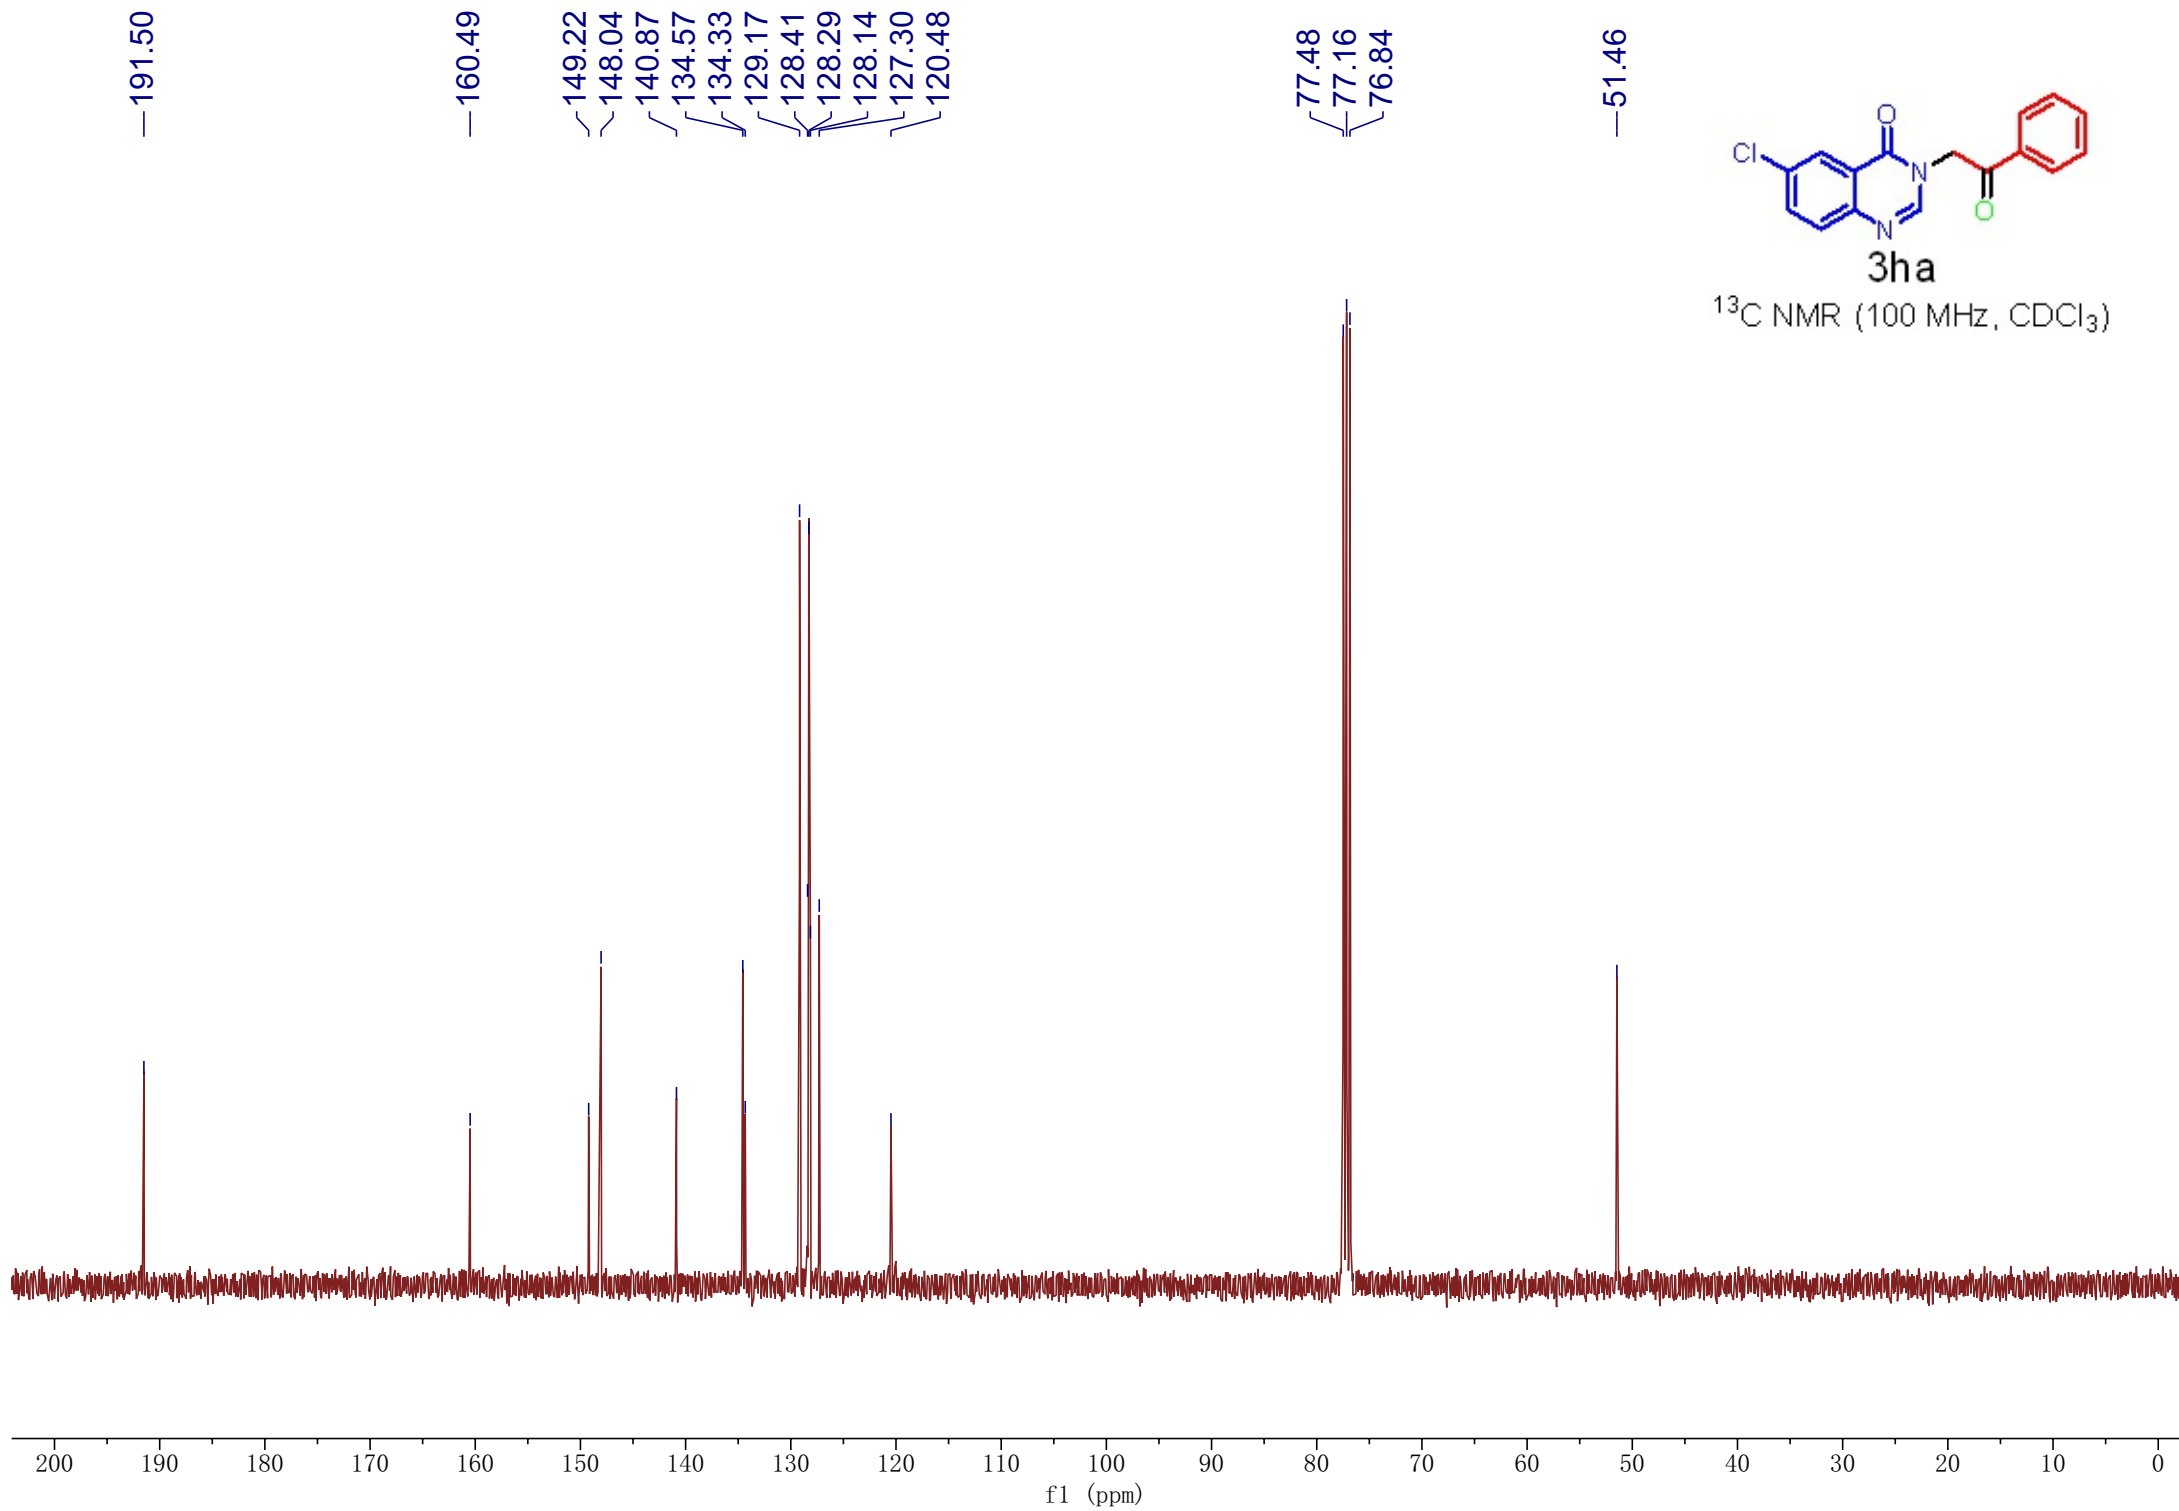

8.422  
8.417  
8.050  
8.047  
8.043  
8.035  
8.030  
8.026  
7.996  
7.873  
7.867  
7.851  
7.846  
7.689  
7.686  
7.683  
7.672  
7.667  
7.663  
7.652  
7.646  
7.624  
7.560  
7.556  
7.540  
7.526  
7.521  
7.260  
-5.447

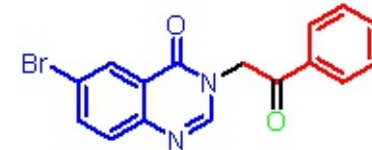

3ia

<sup>1</sup>H NMR (400 MHz, CDCl<sub>3</sub>)

8.422  
8.417  
8.050  
8.047  
8.043  
8.035  
8.030  
8.026  
7.996  
7.873  
7.867  
7.851  
7.846  
7.686  
7.672  
7.667  
7.663  
7.652  
7.646  
7.624  
7.560  
7.556  
7.540  
7.526  
7.521

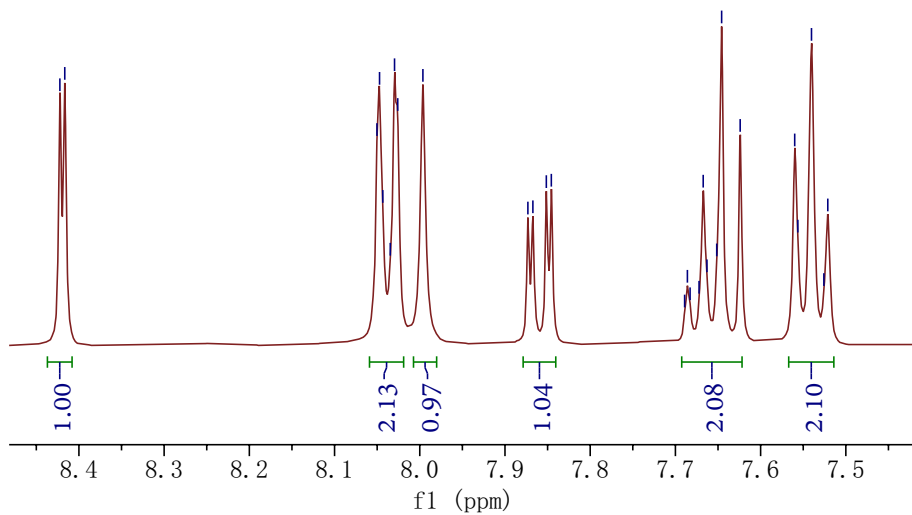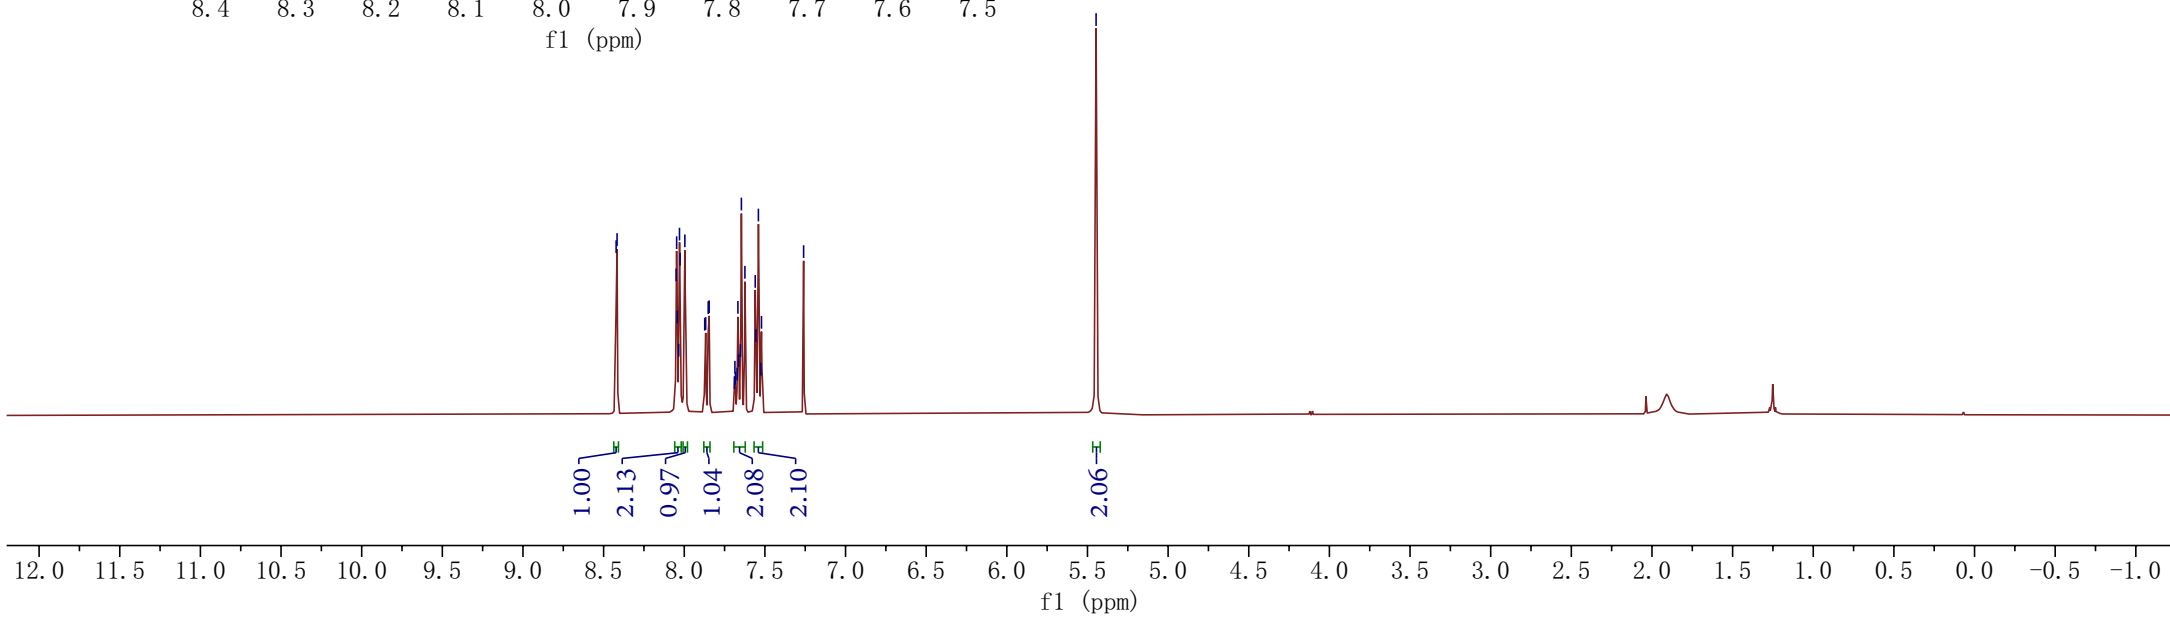



—191.43

—159.98

147.15  
147.10  
137.81  
134.60  
134.37  
129.57  
129.54  
129.20  
128.32  
123.42  
121.17

77.48  
77.16  
76.84

—51.52

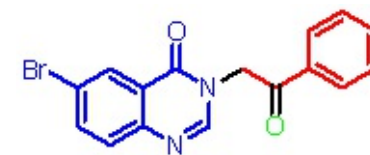

3ia

<sup>13</sup>C NMR (100 MHz, CDCl<sub>3</sub>)

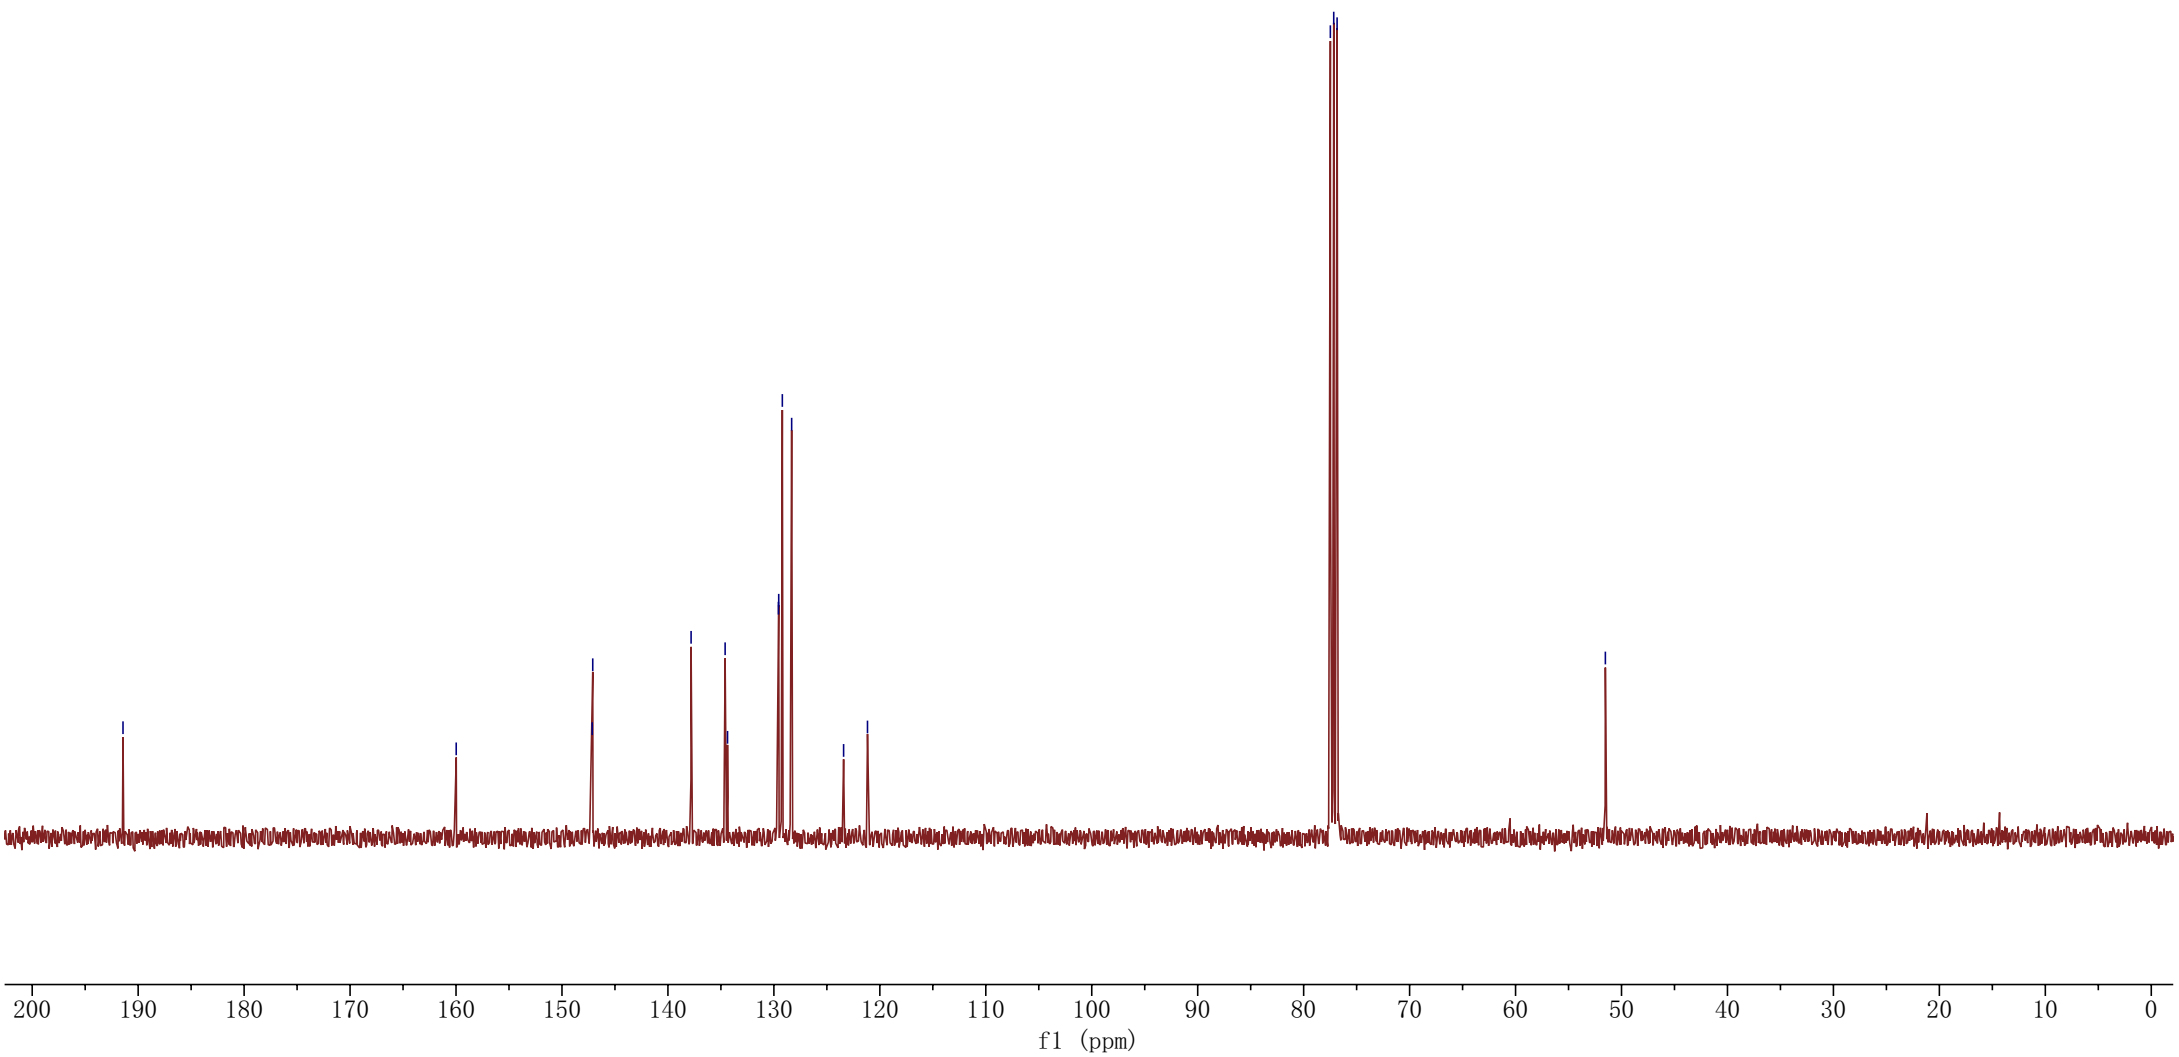

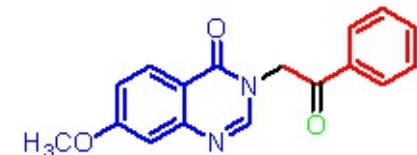

3ja

<sup>1</sup>H NMR (400 MHz, CDCl<sub>3</sub>)

8.186  
8.164  
8.045  
8.042  
8.025  
8.021  
7.947  
7.666  
7.662  
7.659  
7.649  
7.644  
7.639  
7.628  
7.625  
7.622  
7.538  
7.534  
7.519  
7.505  
7.500  
7.260  
7.126  
7.120  
7.079  
7.073  
7.057  
7.050  
-5.406

8.186  
8.164  
8.045  
8.042  
8.025  
8.021  
7.947  
7.662  
7.644  
7.639  
7.628  
7.625  
7.622  
7.538  
7.534  
7.519  
7.500  
7.260  
7.126  
7.120  
7.079  
7.073  
7.057  
7.050

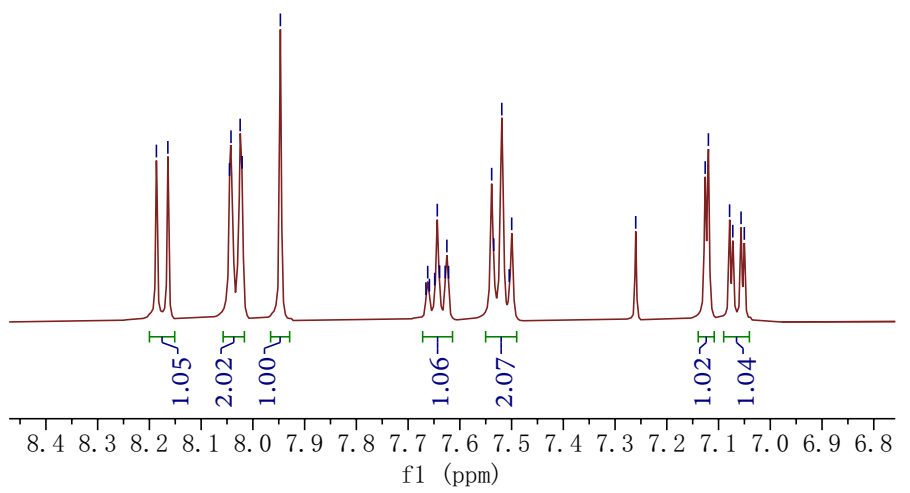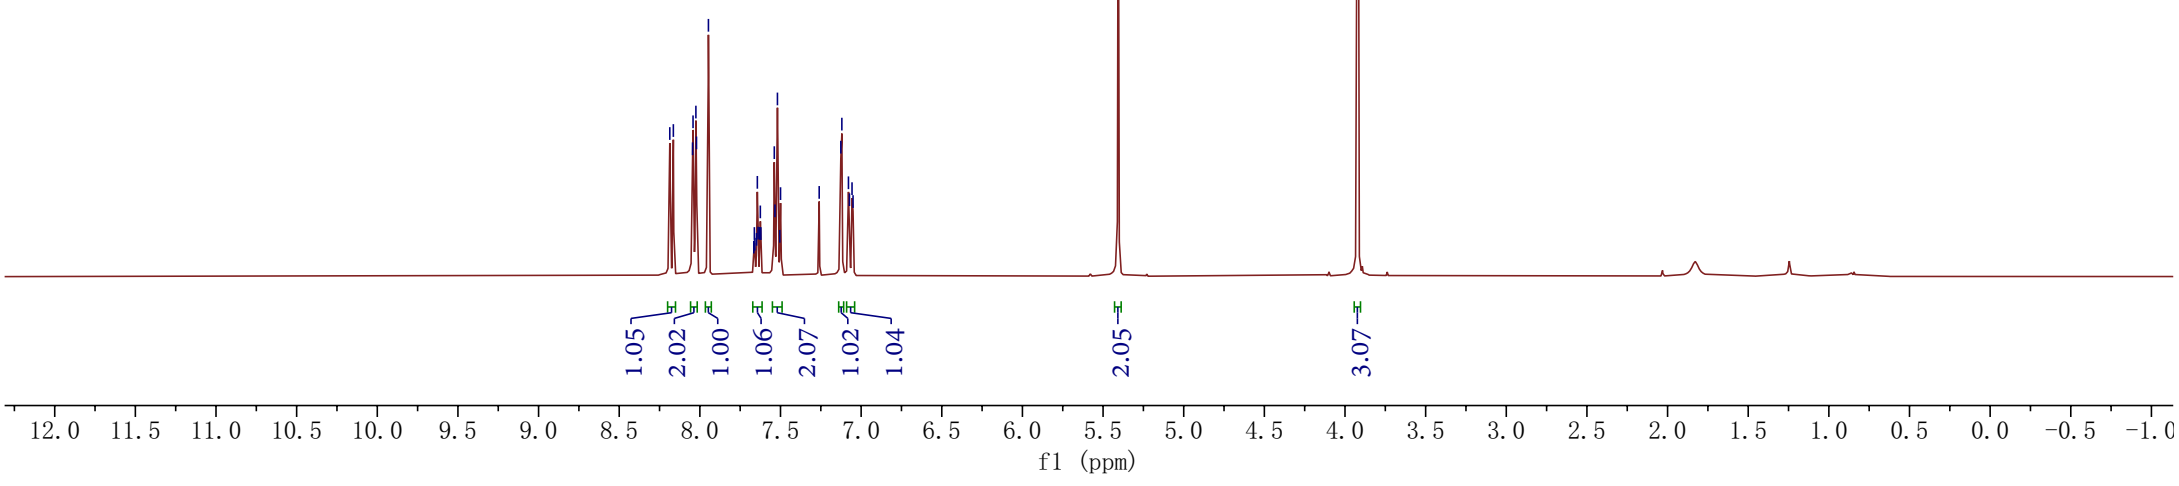

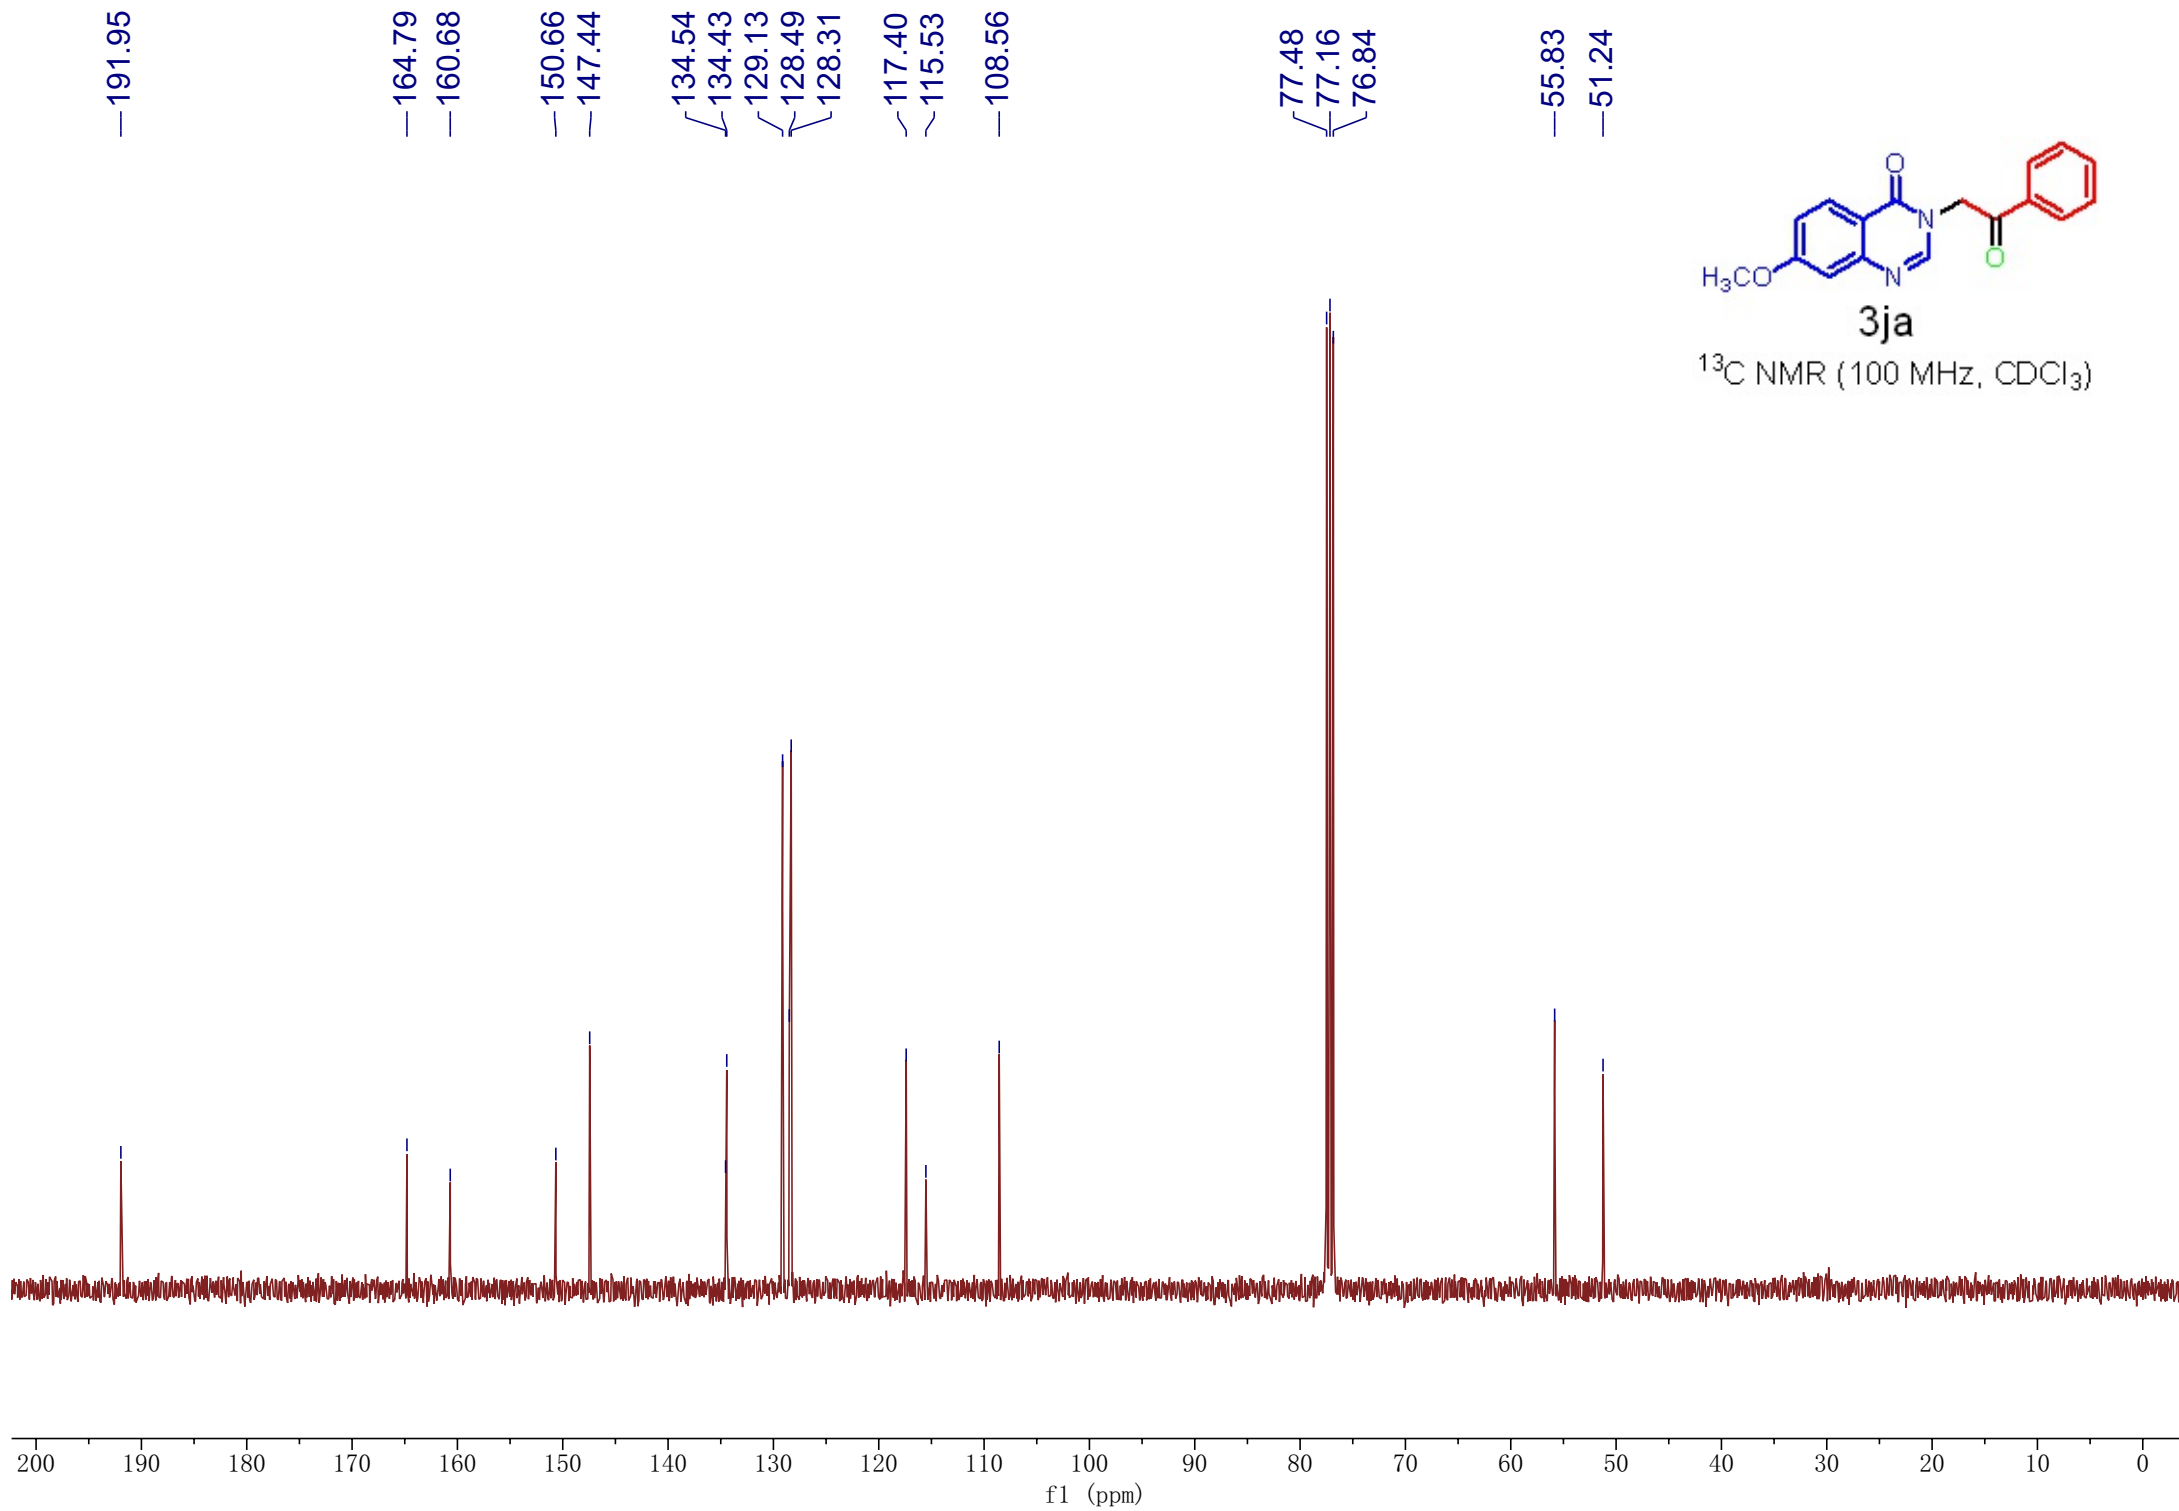

8.183  
8.163  
8.055  
8.052  
8.048  
8.039  
8.034  
8.031  
7.949  
7.672  
7.668  
7.658  
7.653  
7.648  
7.638  
7.634  
7.631  
7.549  
7.545  
7.537  
7.533  
7.529  
7.515  
7.510  
7.340  
7.336  
7.319  
7.315  
7.268  
7.260

8.183  
8.163  
8.055  
8.052  
8.048  
8.039  
8.034  
8.031  
7.949  
7.672  
7.668  
7.658  
7.653  
7.648  
7.638  
7.634  
7.631  
7.549  
7.546  
7.537  
7.533  
7.529  
7.515  
7.510

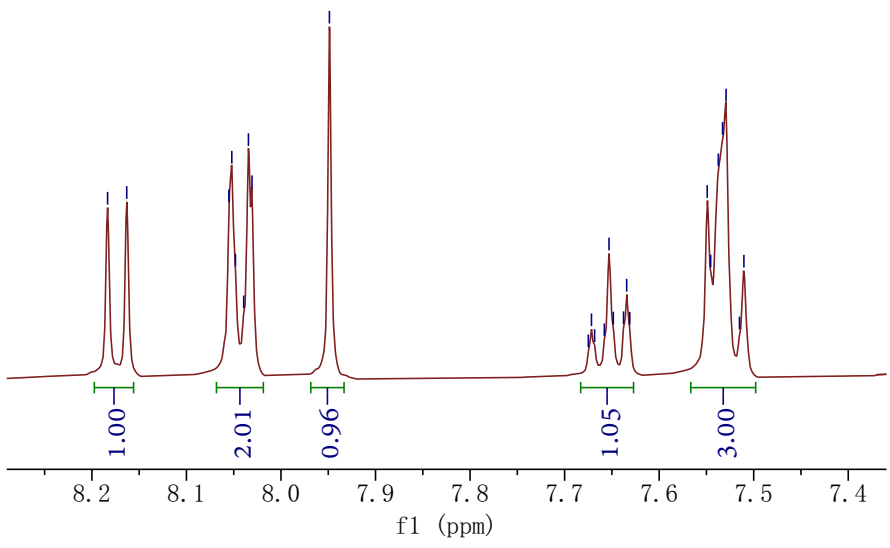

2.515

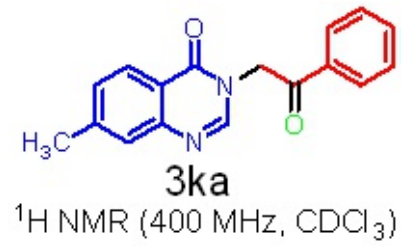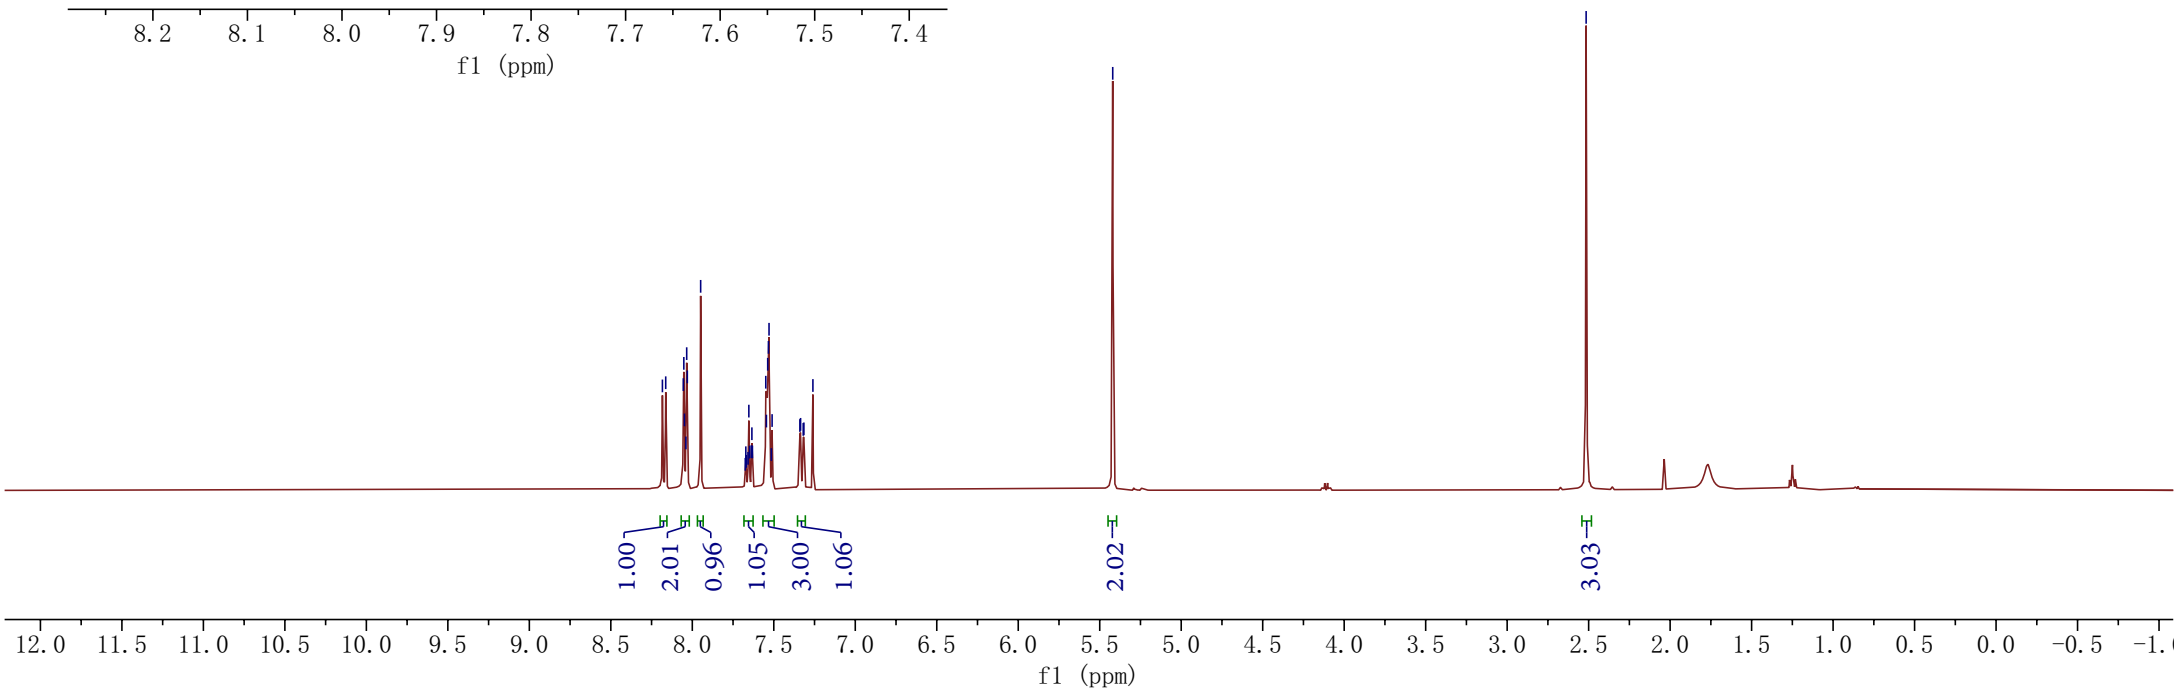

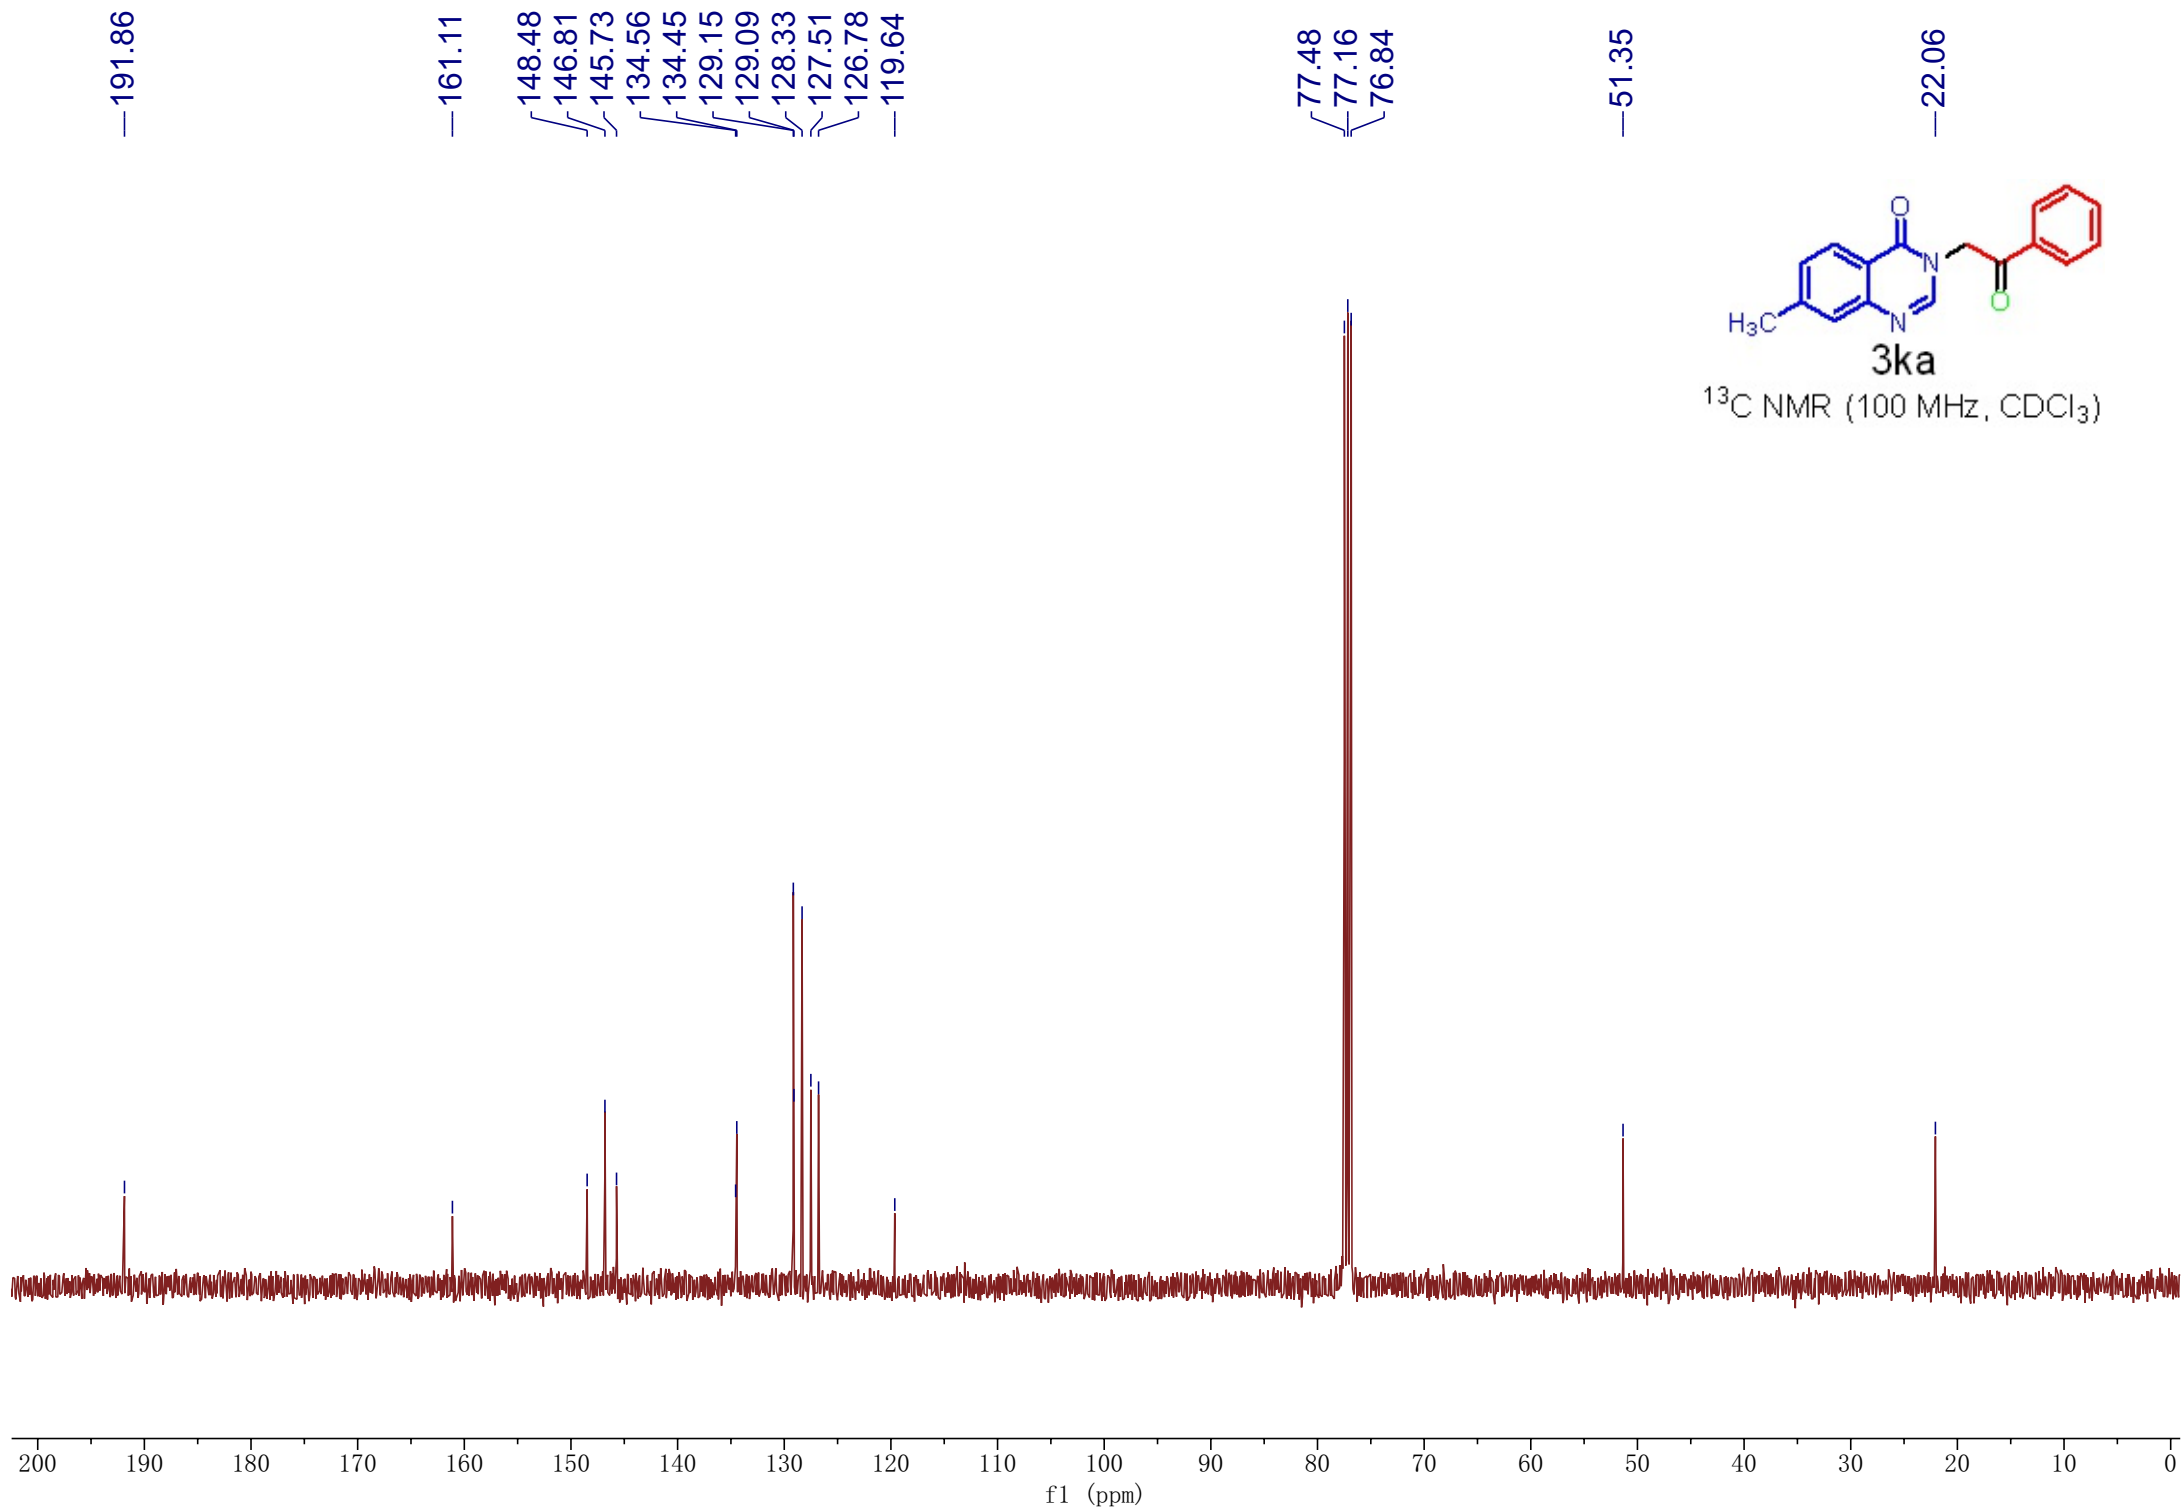

8.315  
8.299  
8.292  
8.277  
8.047  
8.044  
8.041  
8.032  
8.027  
8.023  
7.984  
7.659  
7.641  
7.552  
7.548  
7.535  
7.532  
7.527  
7.513  
7.409  
7.402  
7.385  
7.379  
7.260  
7.245  
7.239  
7.224  
7.217  
7.202  
7.197

8.315  
8.299  
8.292  
8.277  
8.047  
8.044  
8.041  
8.027  
8.023  
7.984  
7.659  
7.552  
7.535  
7.532  
7.513  
7.409  
7.402  
7.385  
7.379  
7.260  
7.224  
7.217

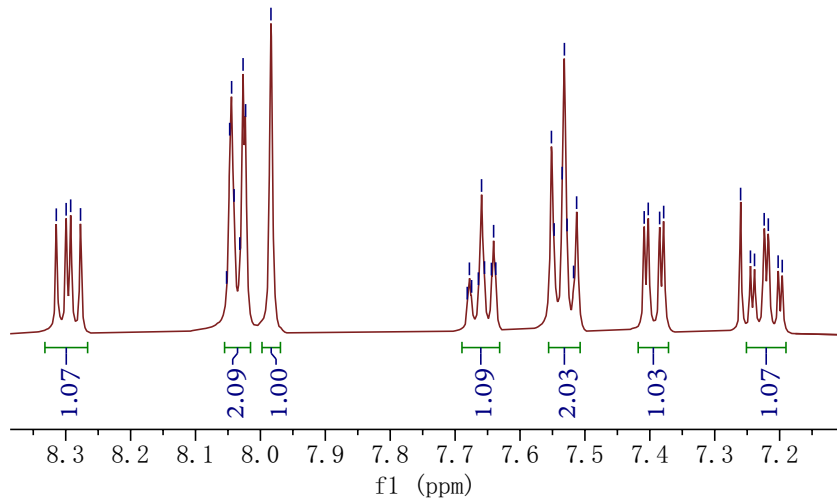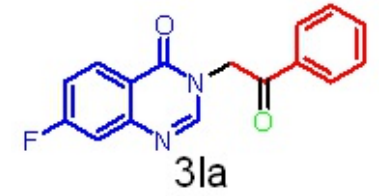

<sup>1</sup>H NMR (400 MHz, CDCl<sub>3</sub>)

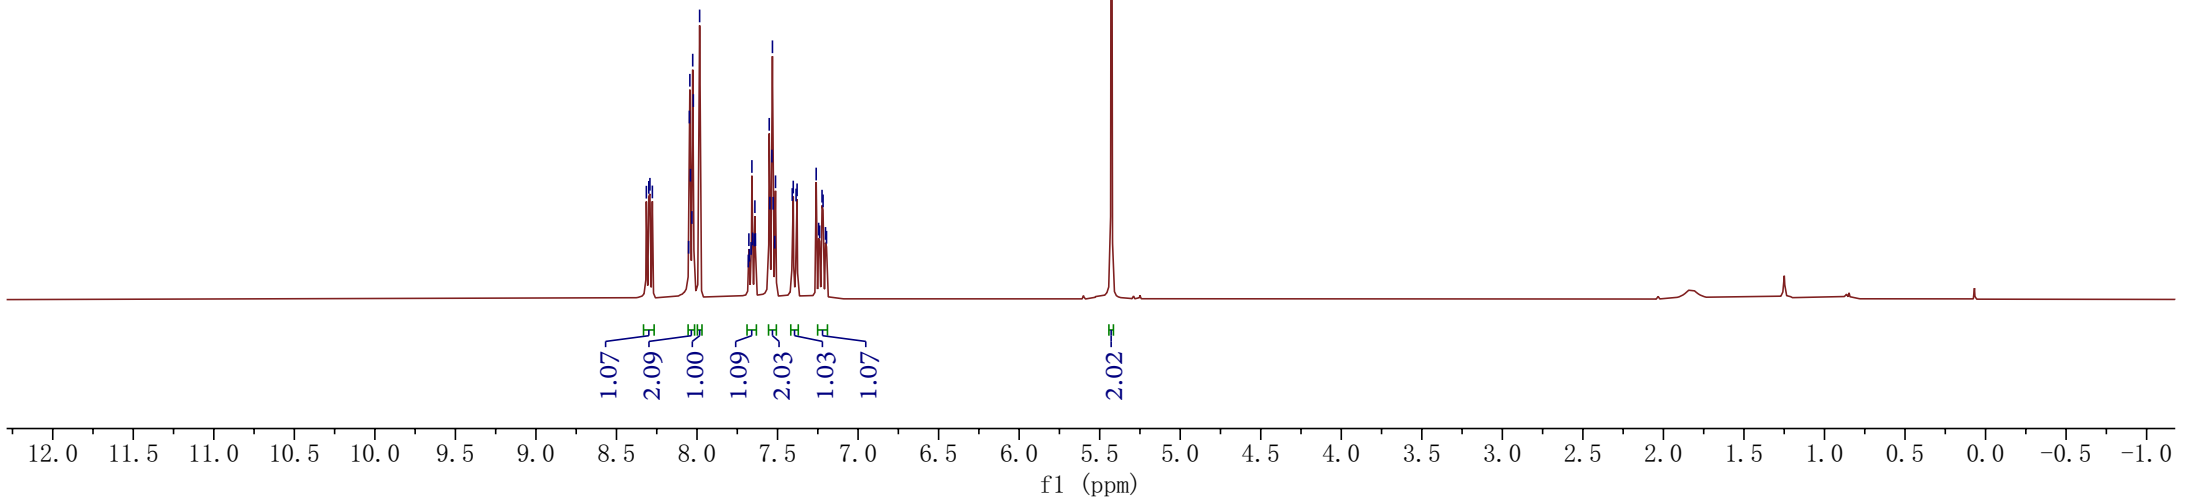

—191.60

~167.92  
~165.39  
~160.42

150.63  
150.50  
147.97  
134.57  
134.44  
129.79  
129.68  
129.20  
128.33  
118.82  
118.79  
116.41  
116.18  
113.32  
113.11

77.48  
77.16  
76.84

—51.38

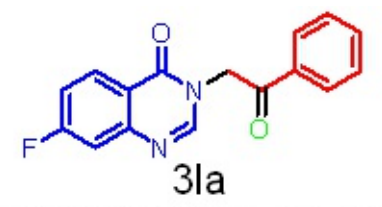

<sup>13</sup>C NMR (100 MHz, CDCl<sub>3</sub>)

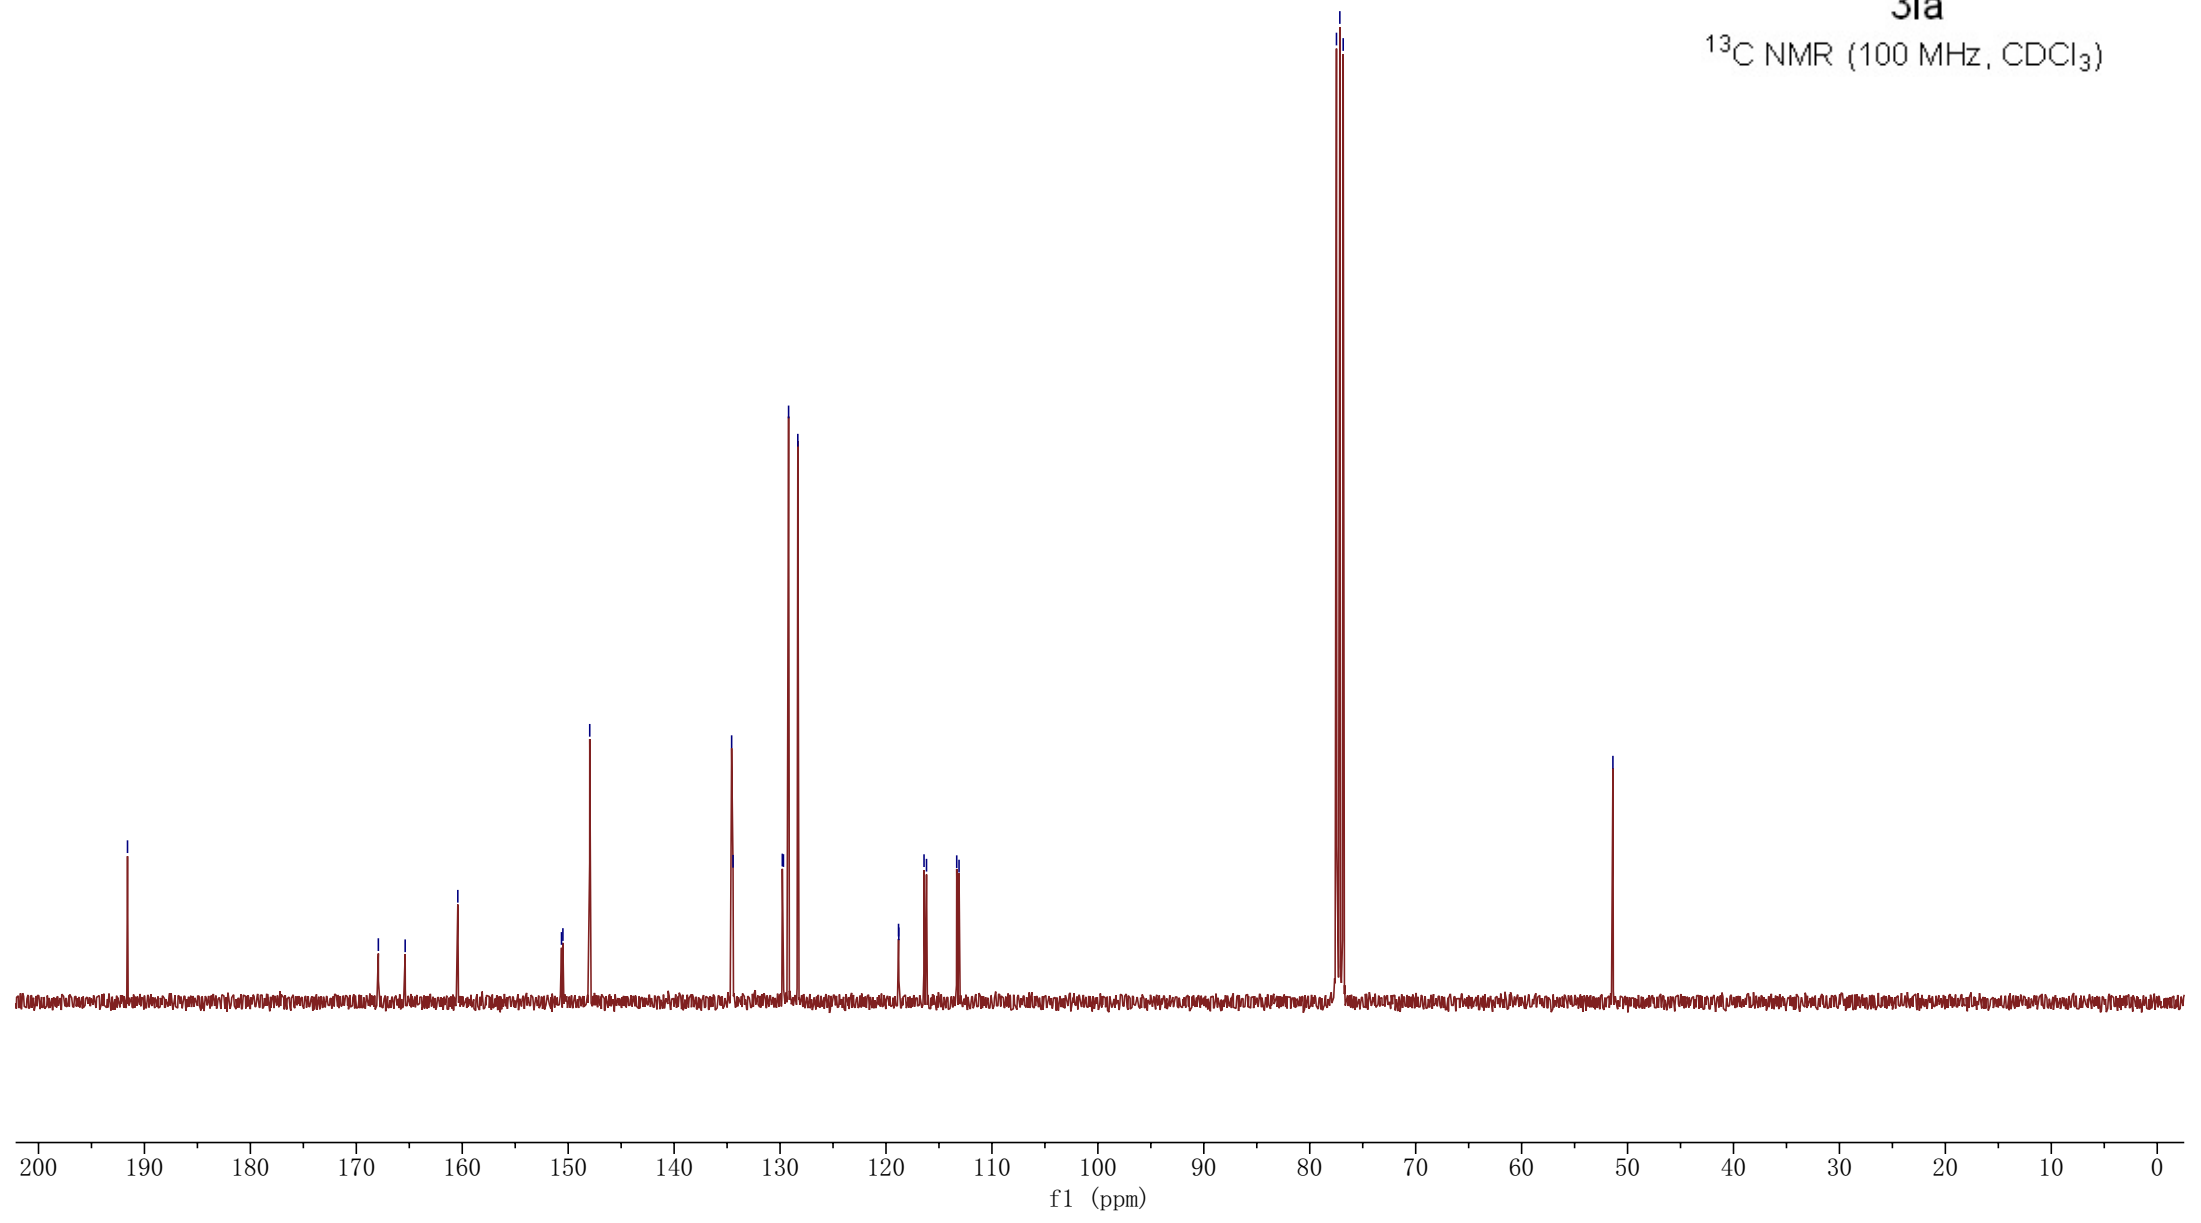

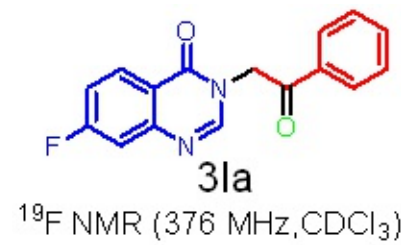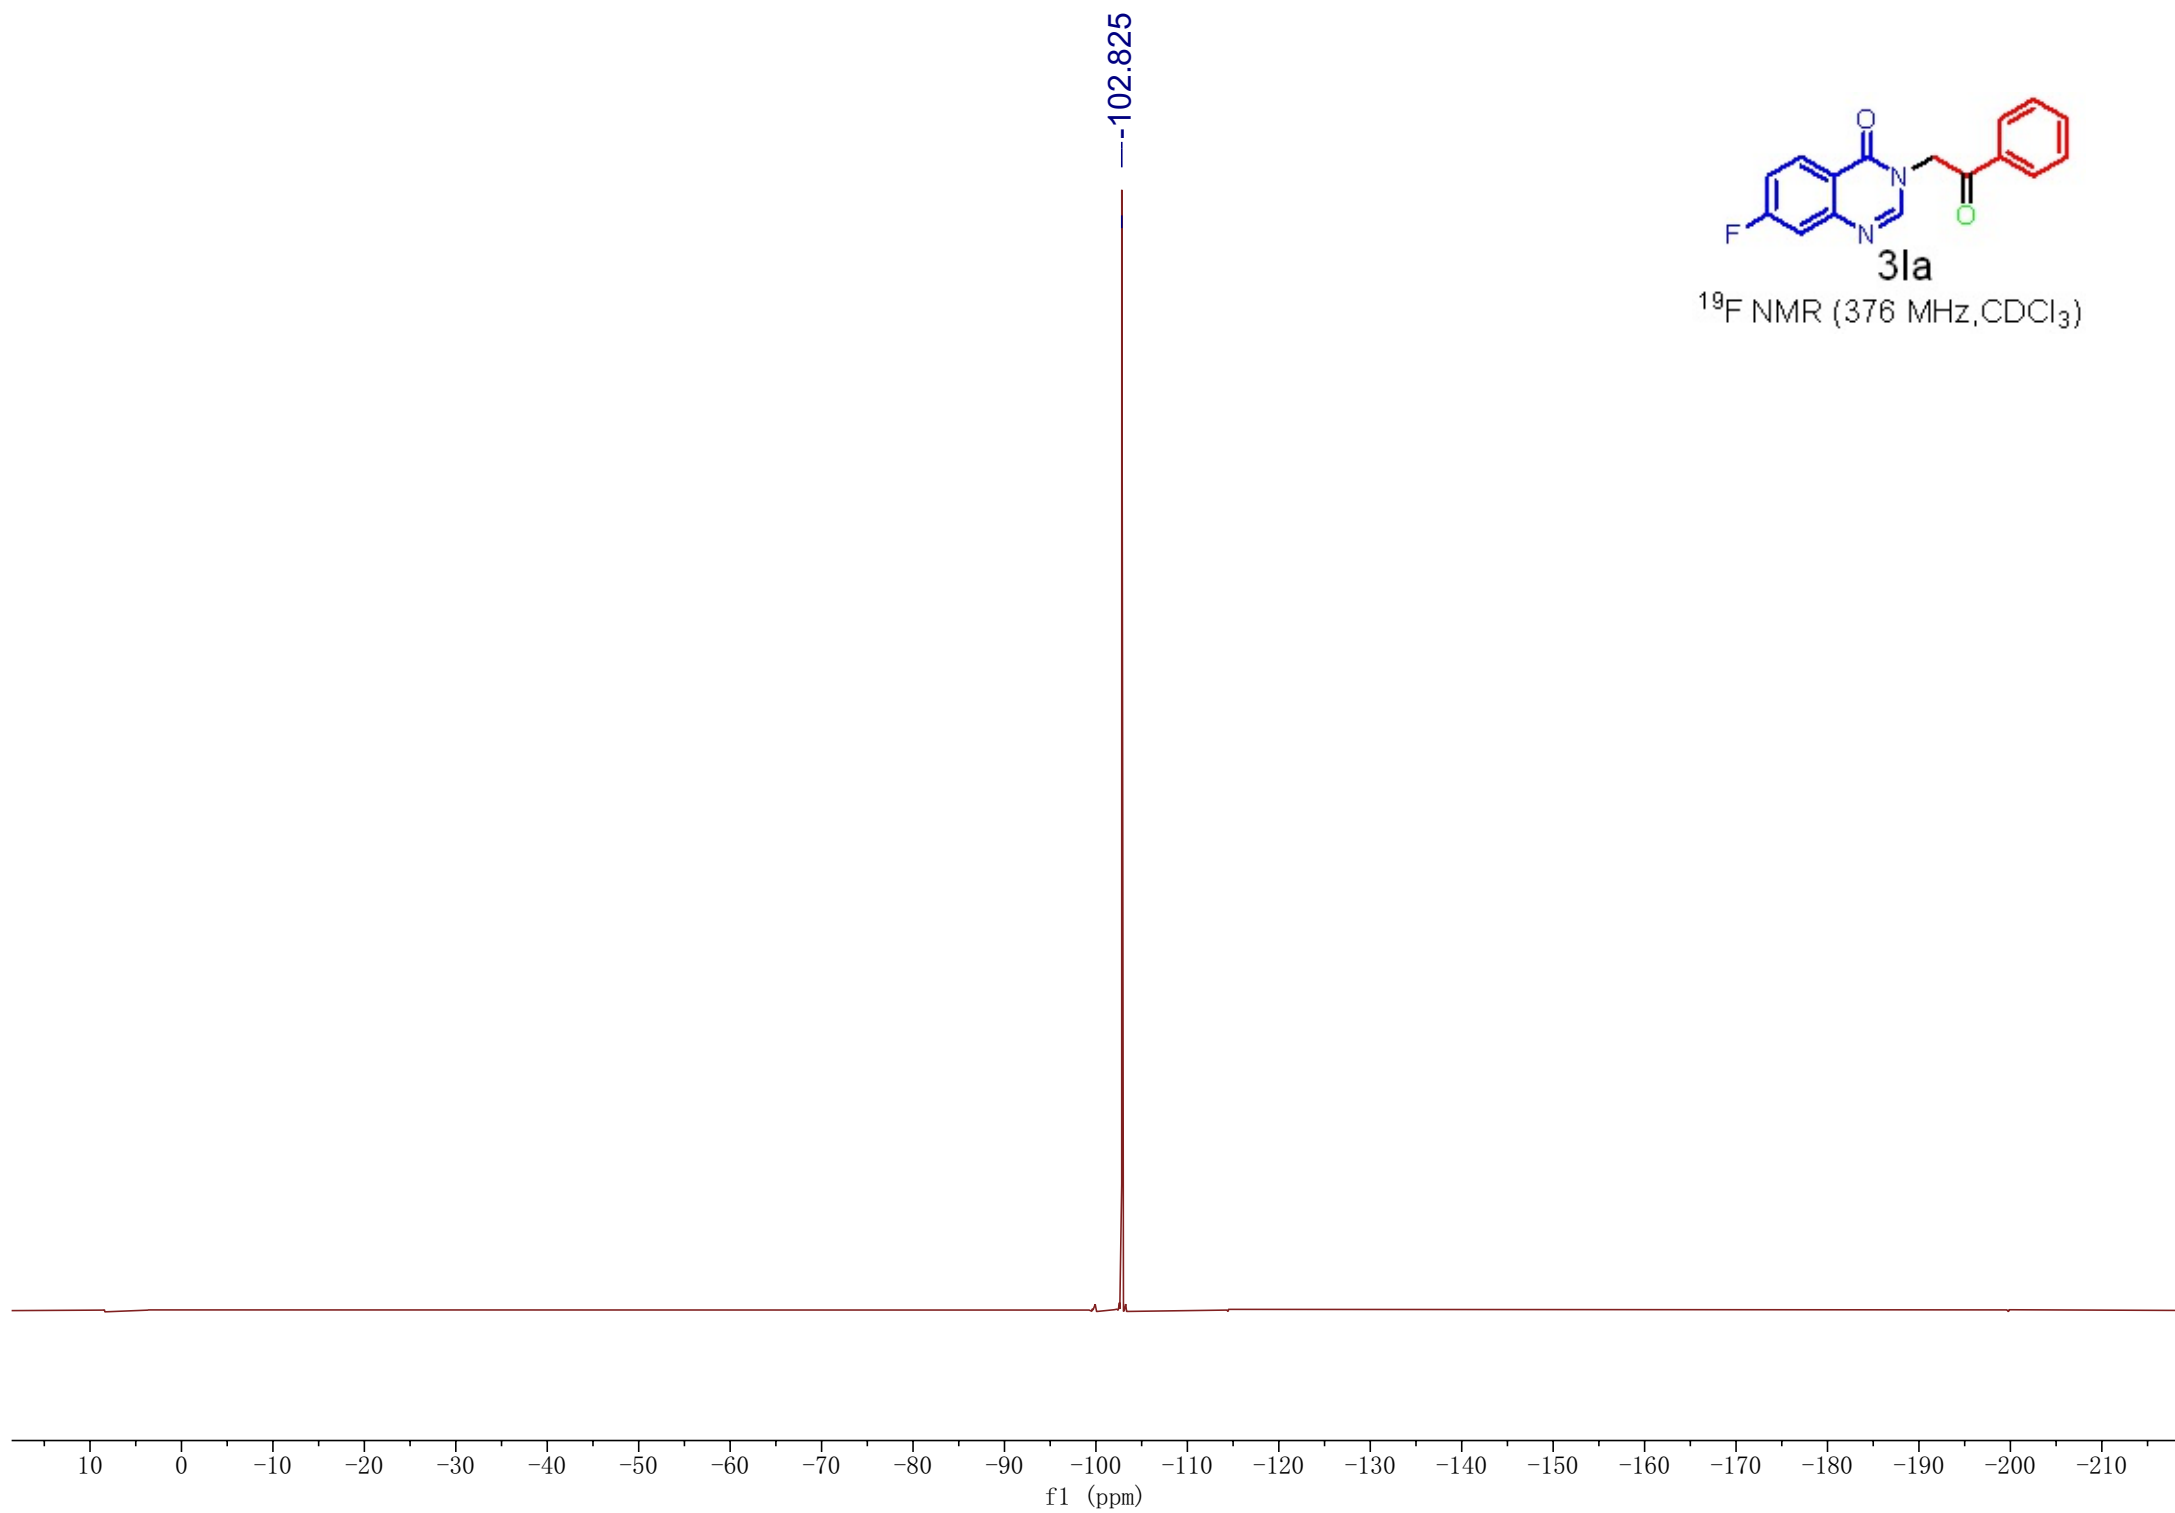



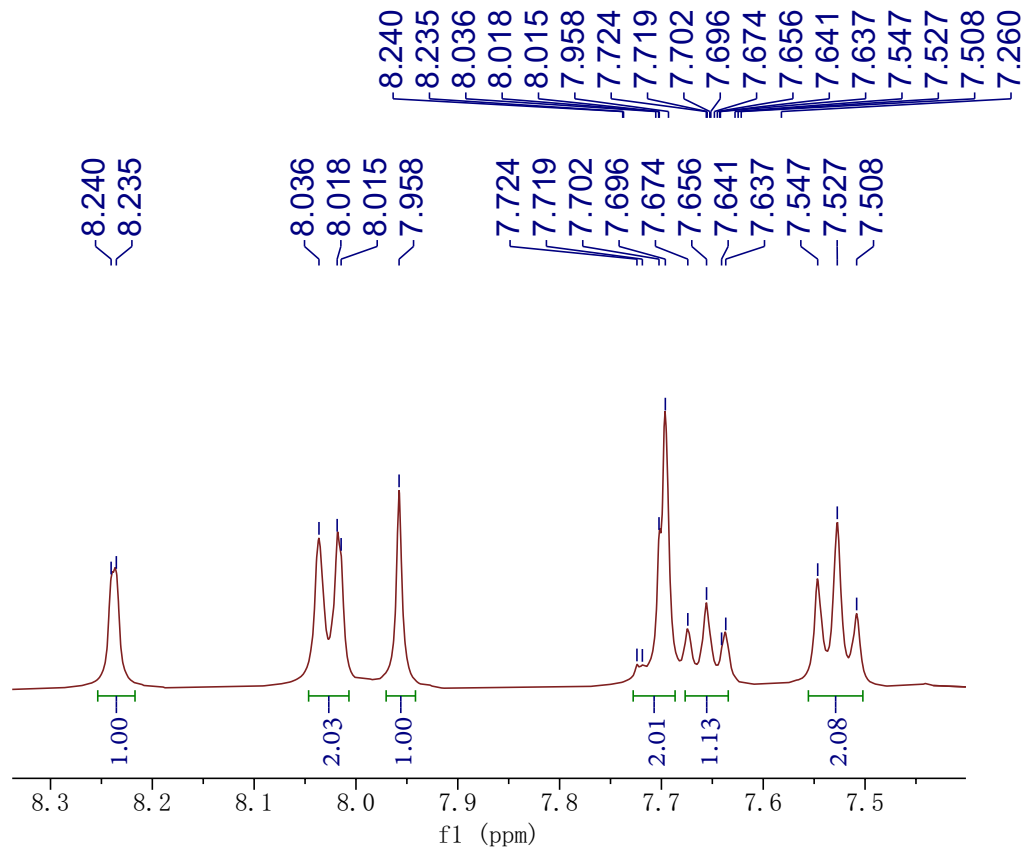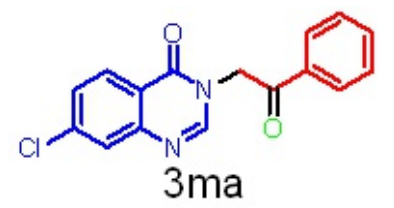

<sup>1</sup>H NMR (400 MHz, CDCl<sub>3</sub>)

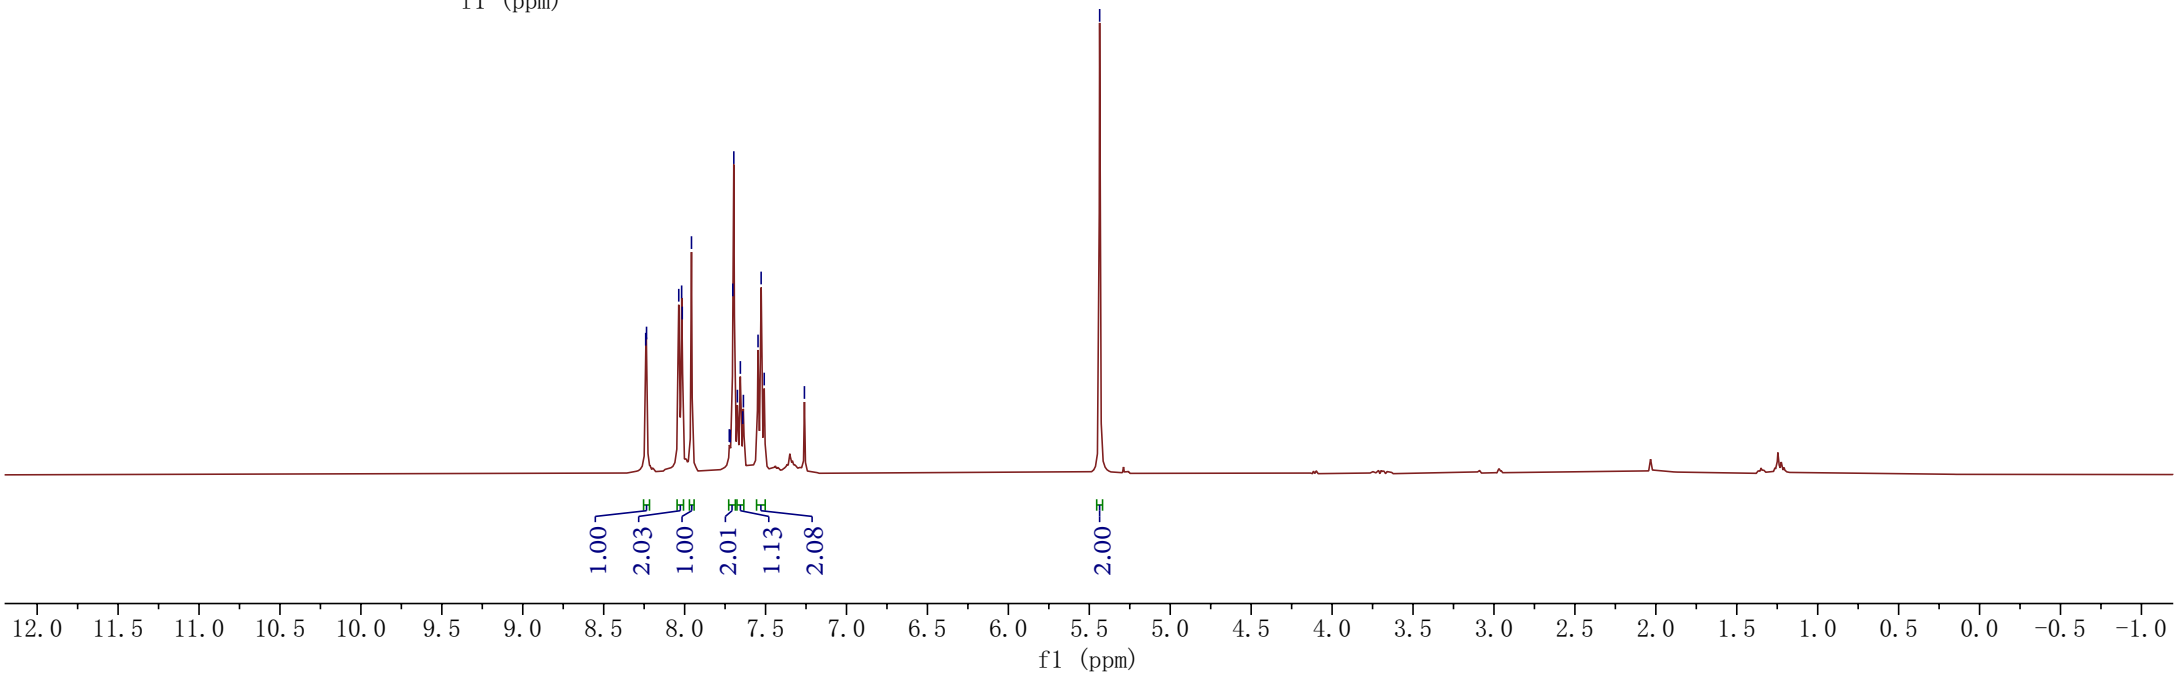

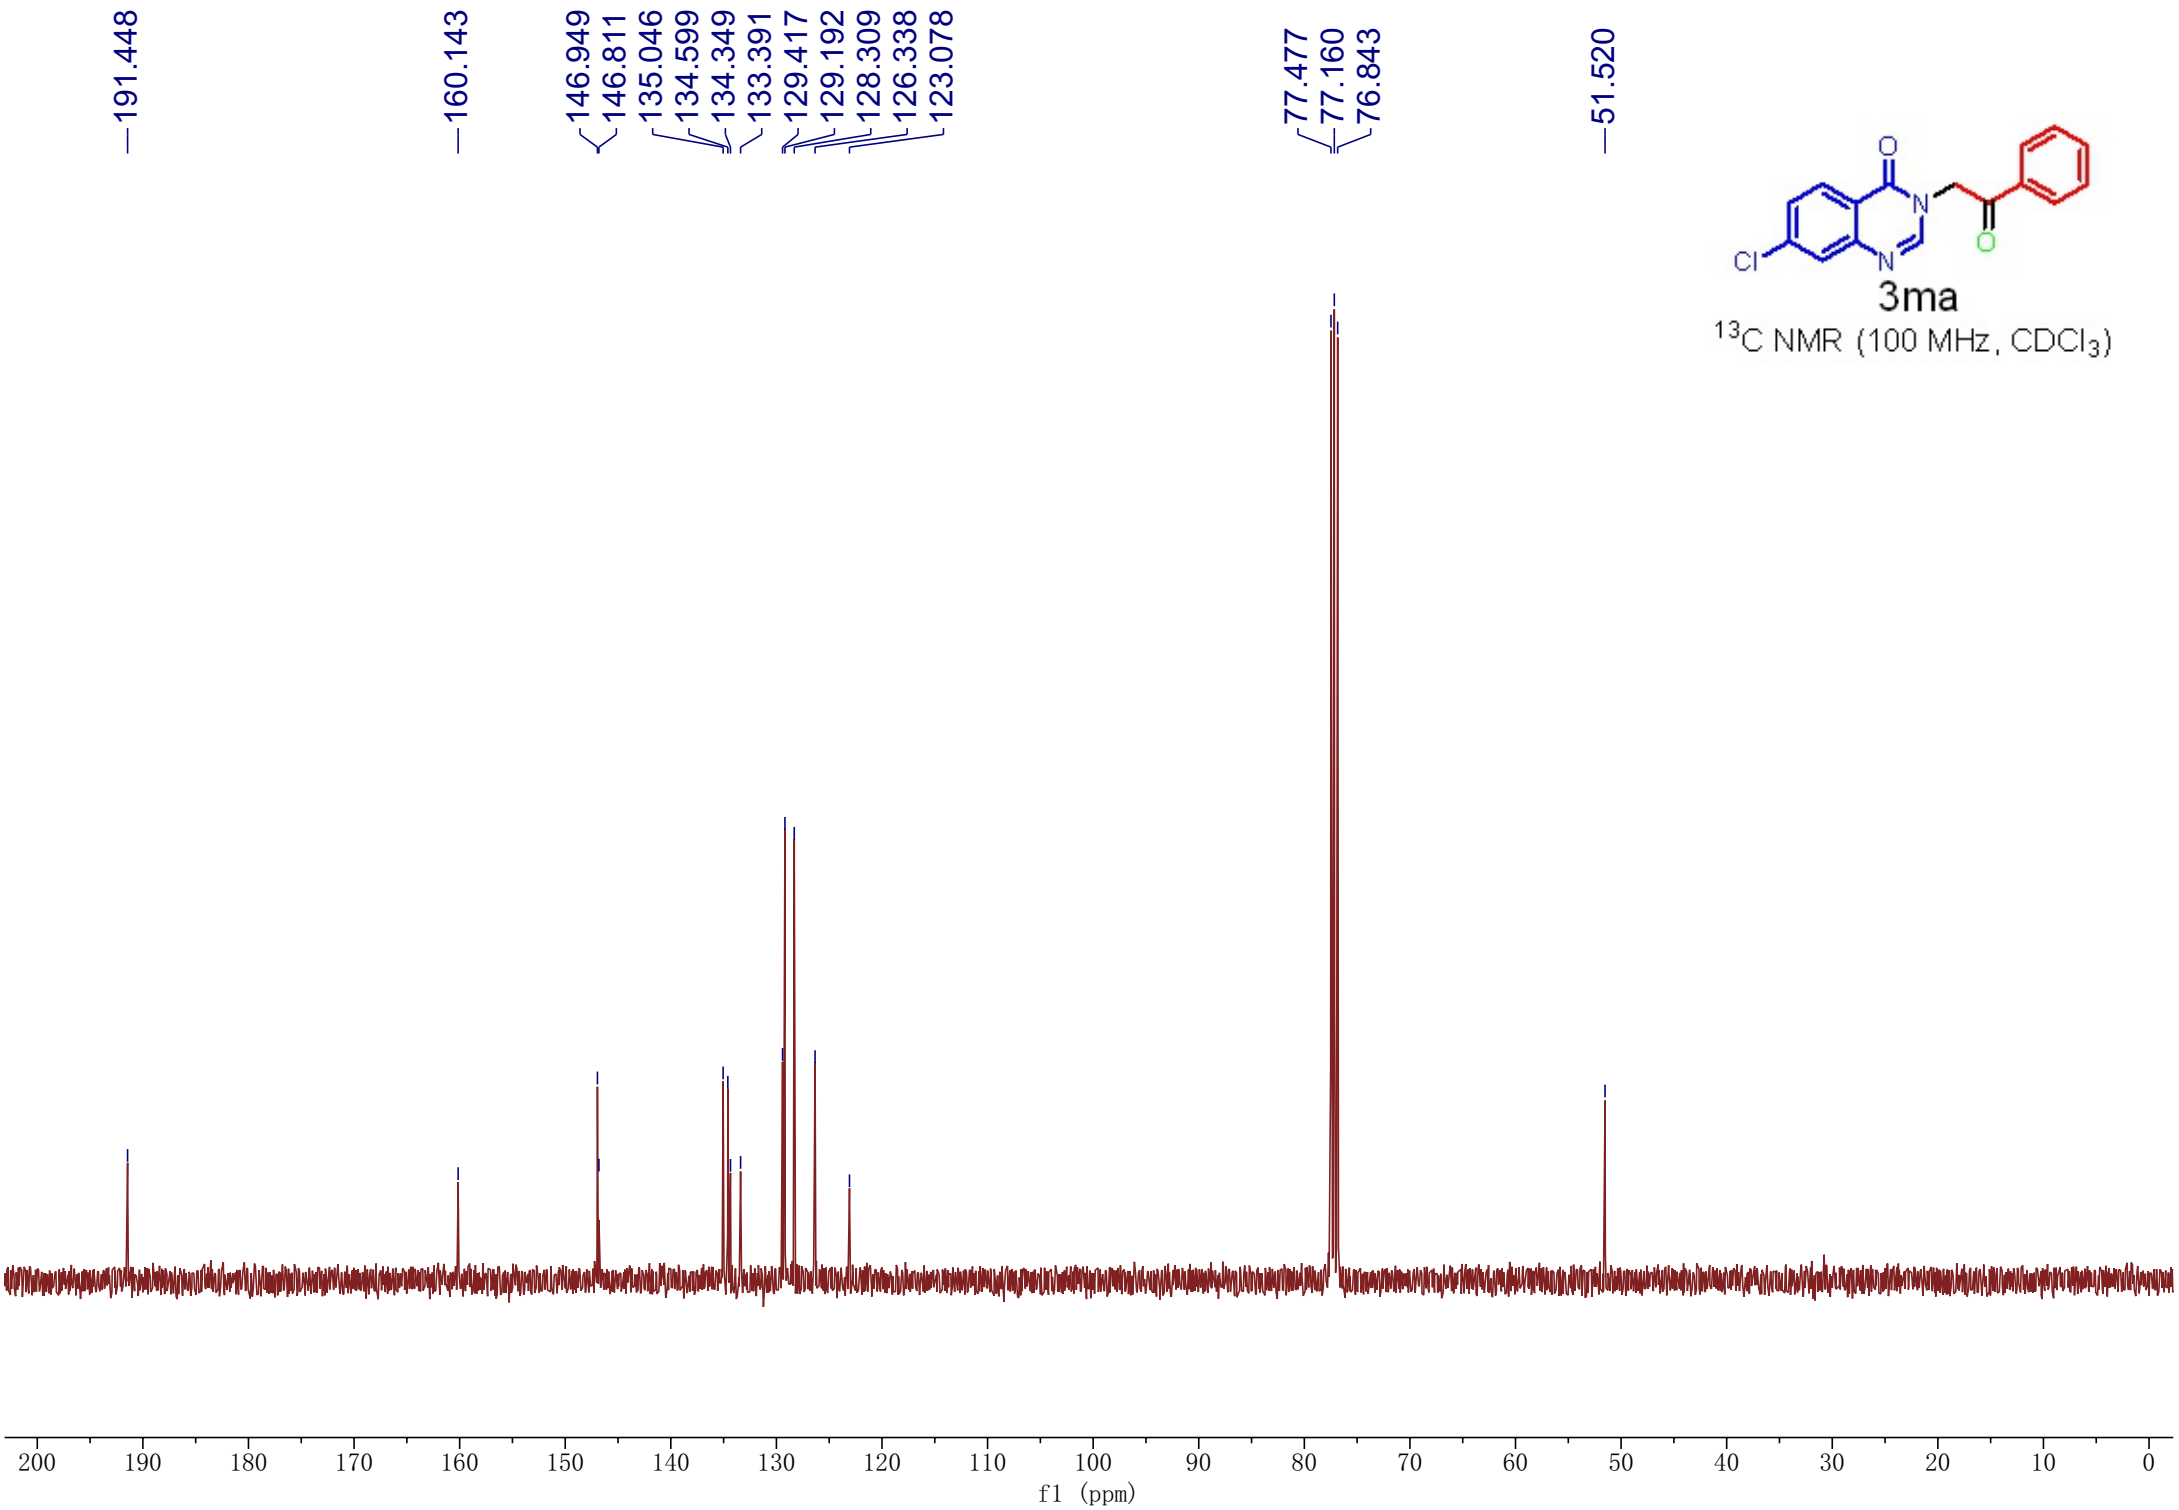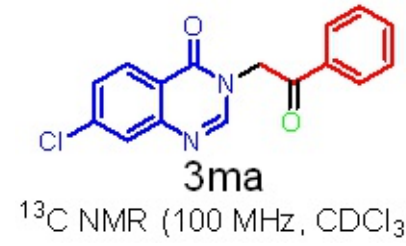

8.144  
8.122  
8.045  
8.042  
8.038  
8.024  
8.021  
7.970  
7.928  
7.924  
7.685  
7.682  
7.678  
7.668  
7.663  
7.658  
7.648  
7.644  
7.641  
7.624  
7.619  
7.603  
7.598  
7.554  
7.550  
7.534  
7.520  
7.515  
7.260  
-5.422

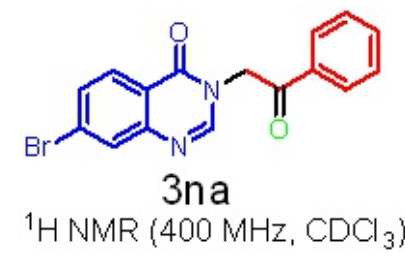

8.144  
8.122  
8.045  
8.042  
8.038  
8.024  
8.021  
7.970  
7.928  
7.924  
7.663  
7.658  
7.648  
7.644  
7.641  
7.624  
7.619  
7.603  
7.598  
7.554  
7.550  
7.534  
7.515

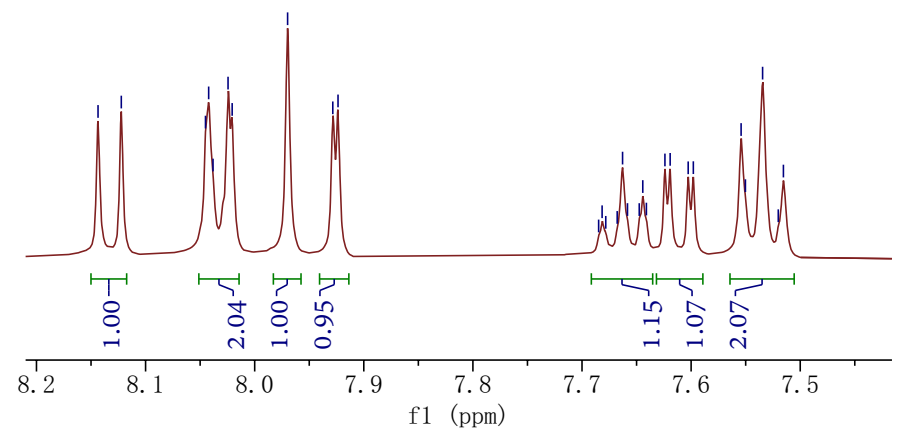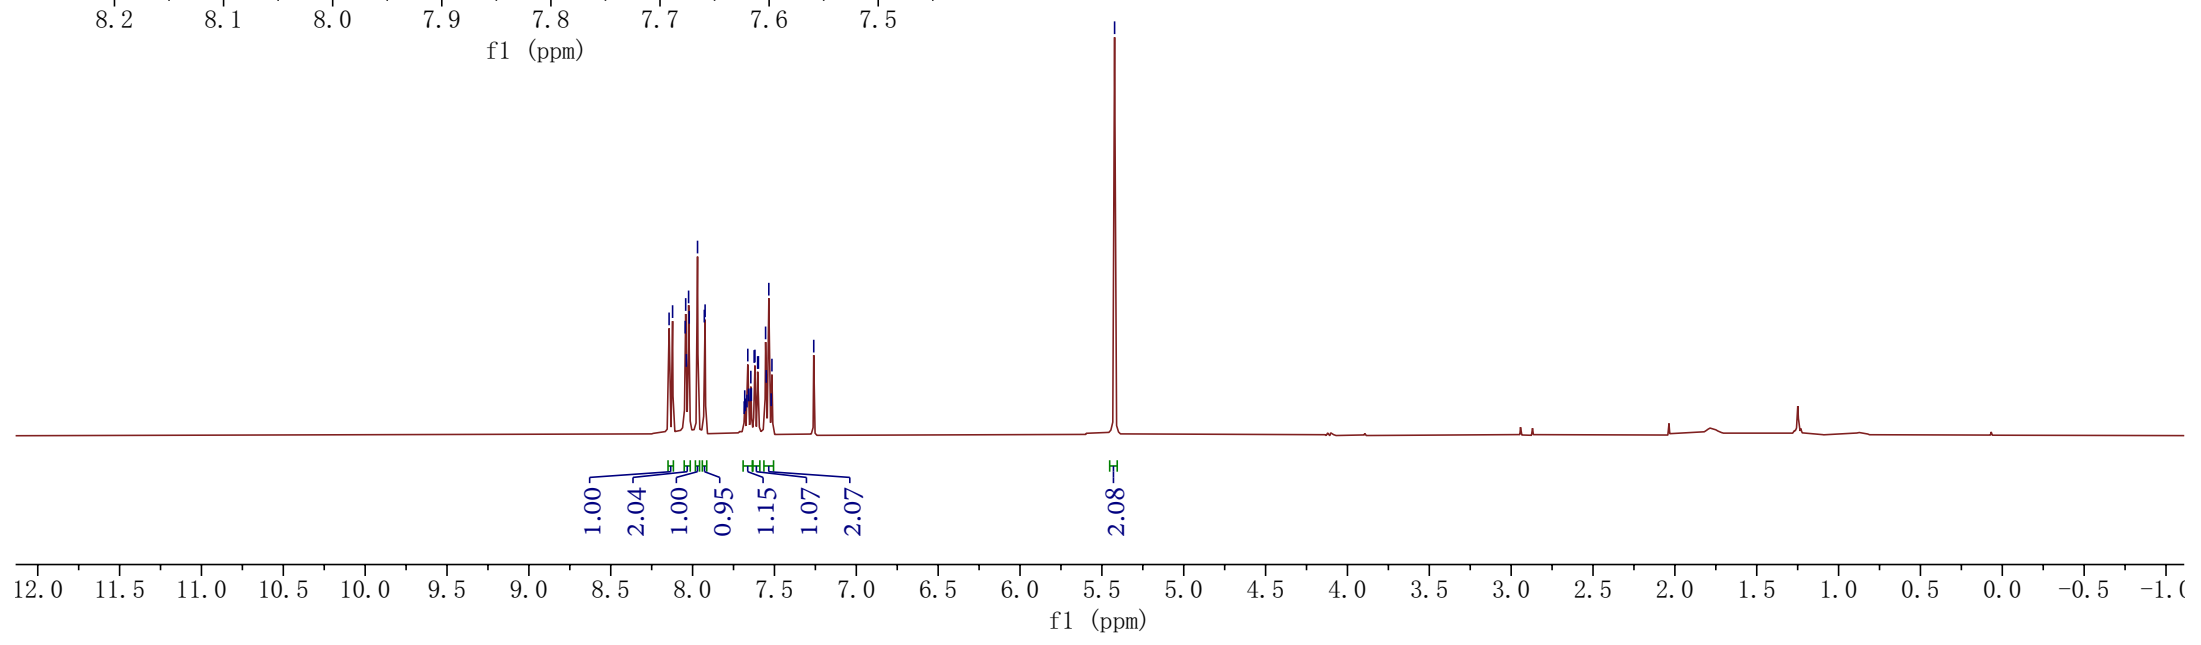

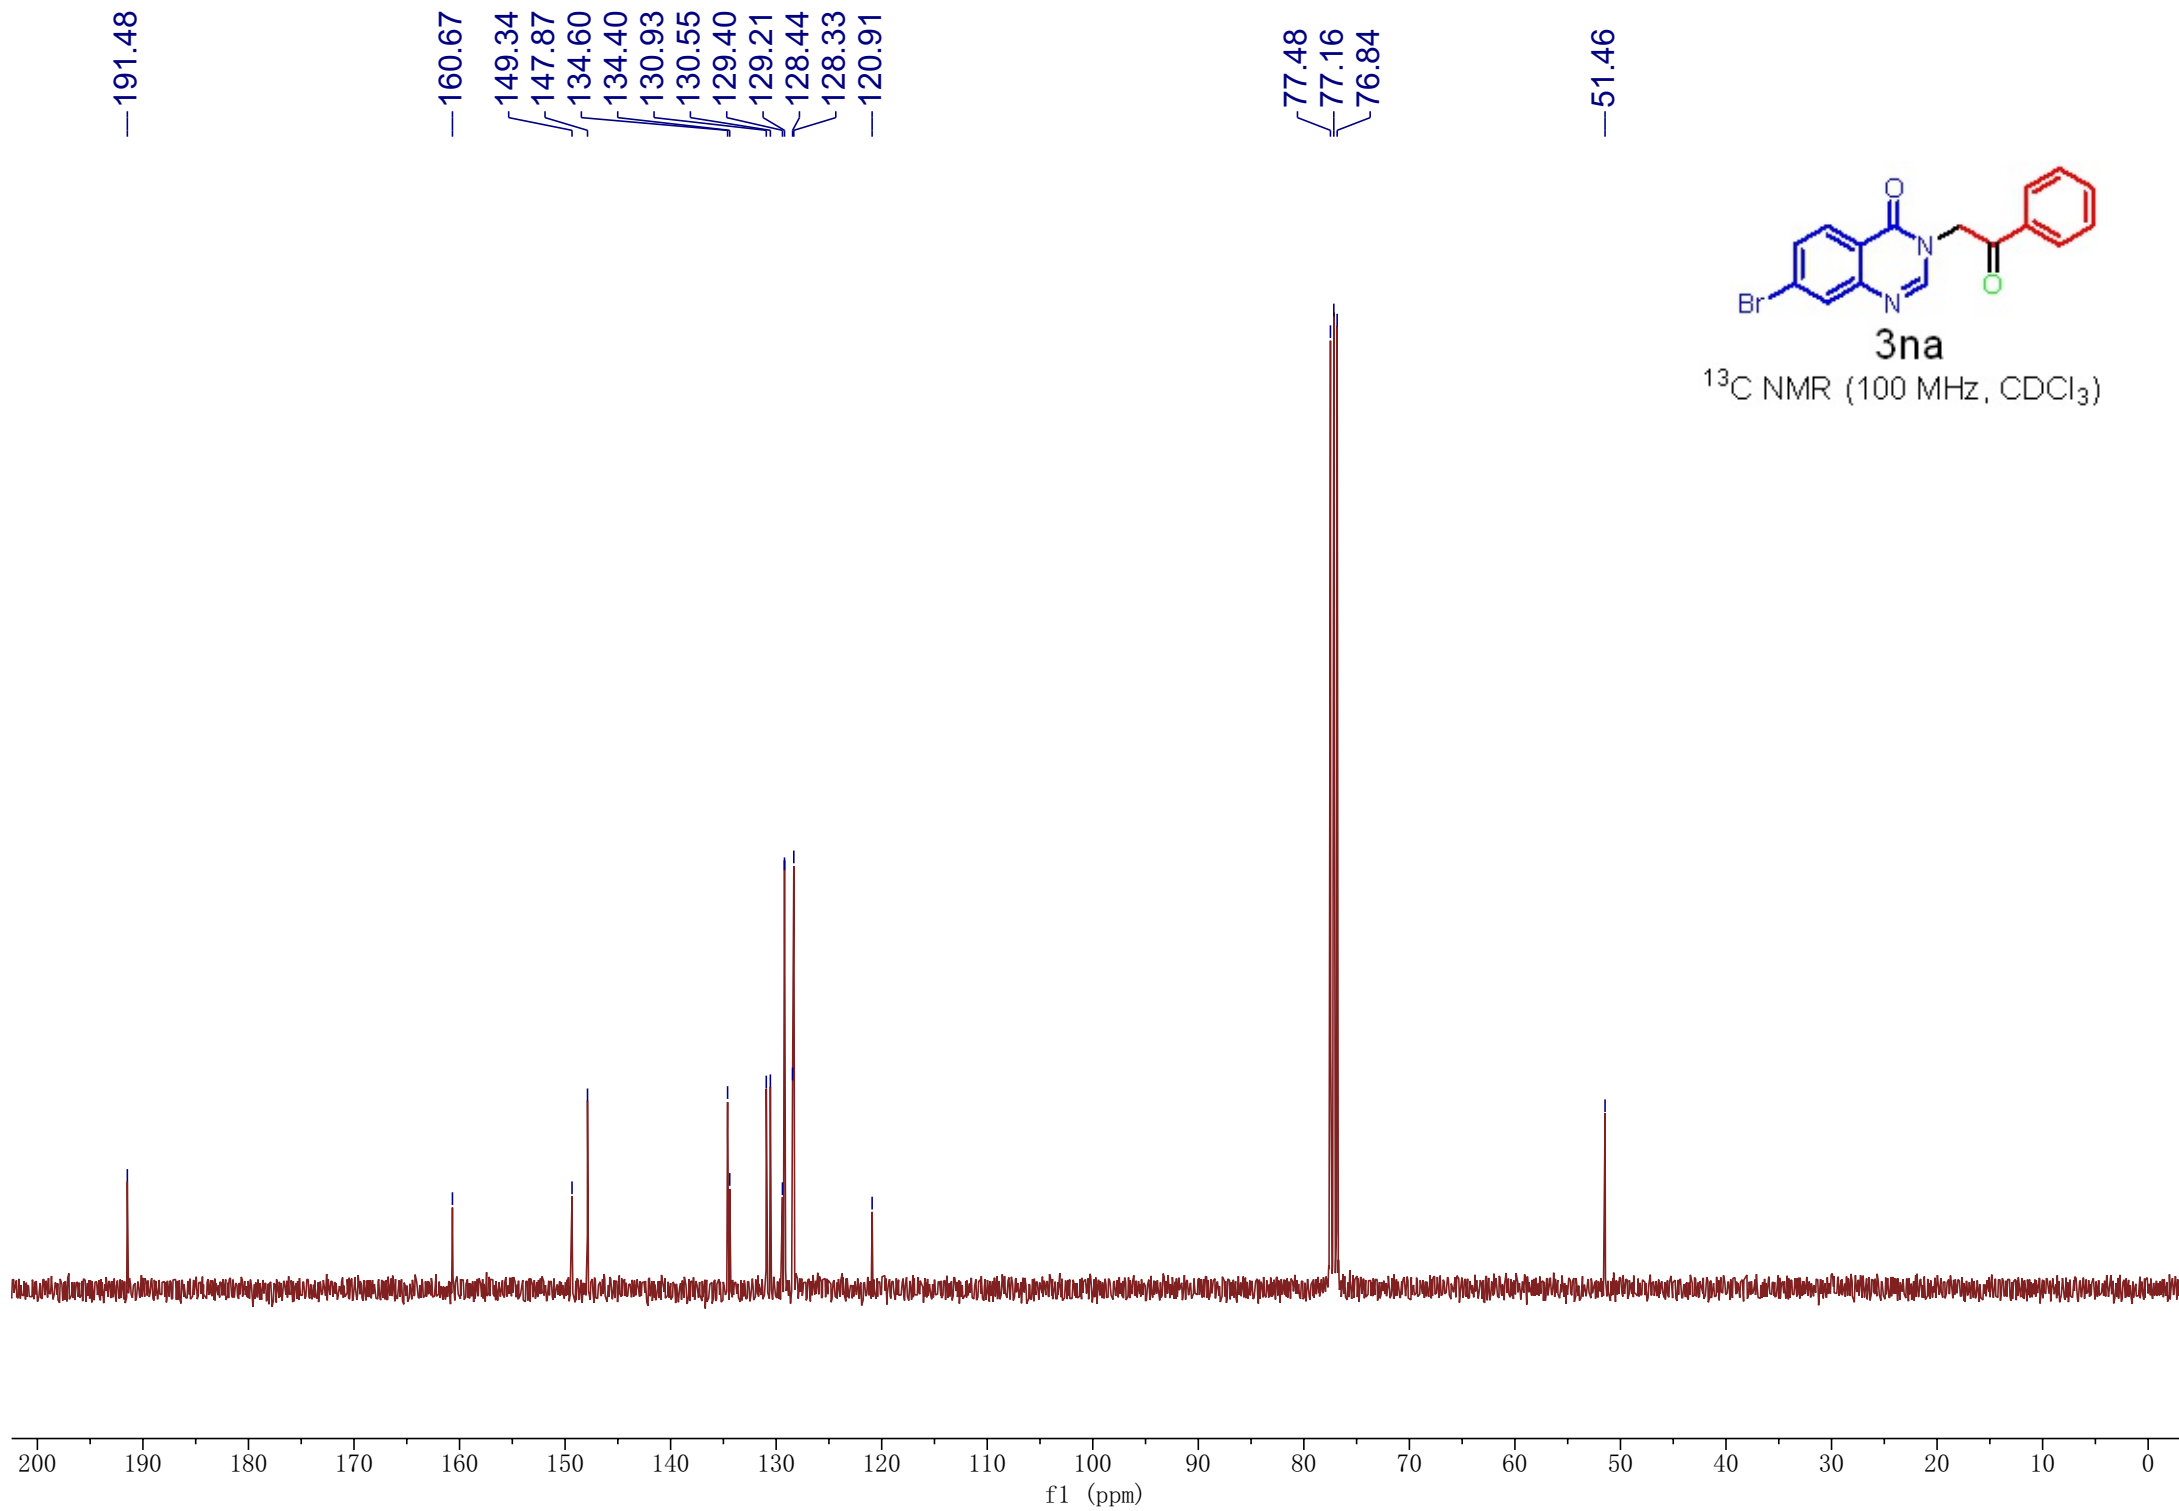

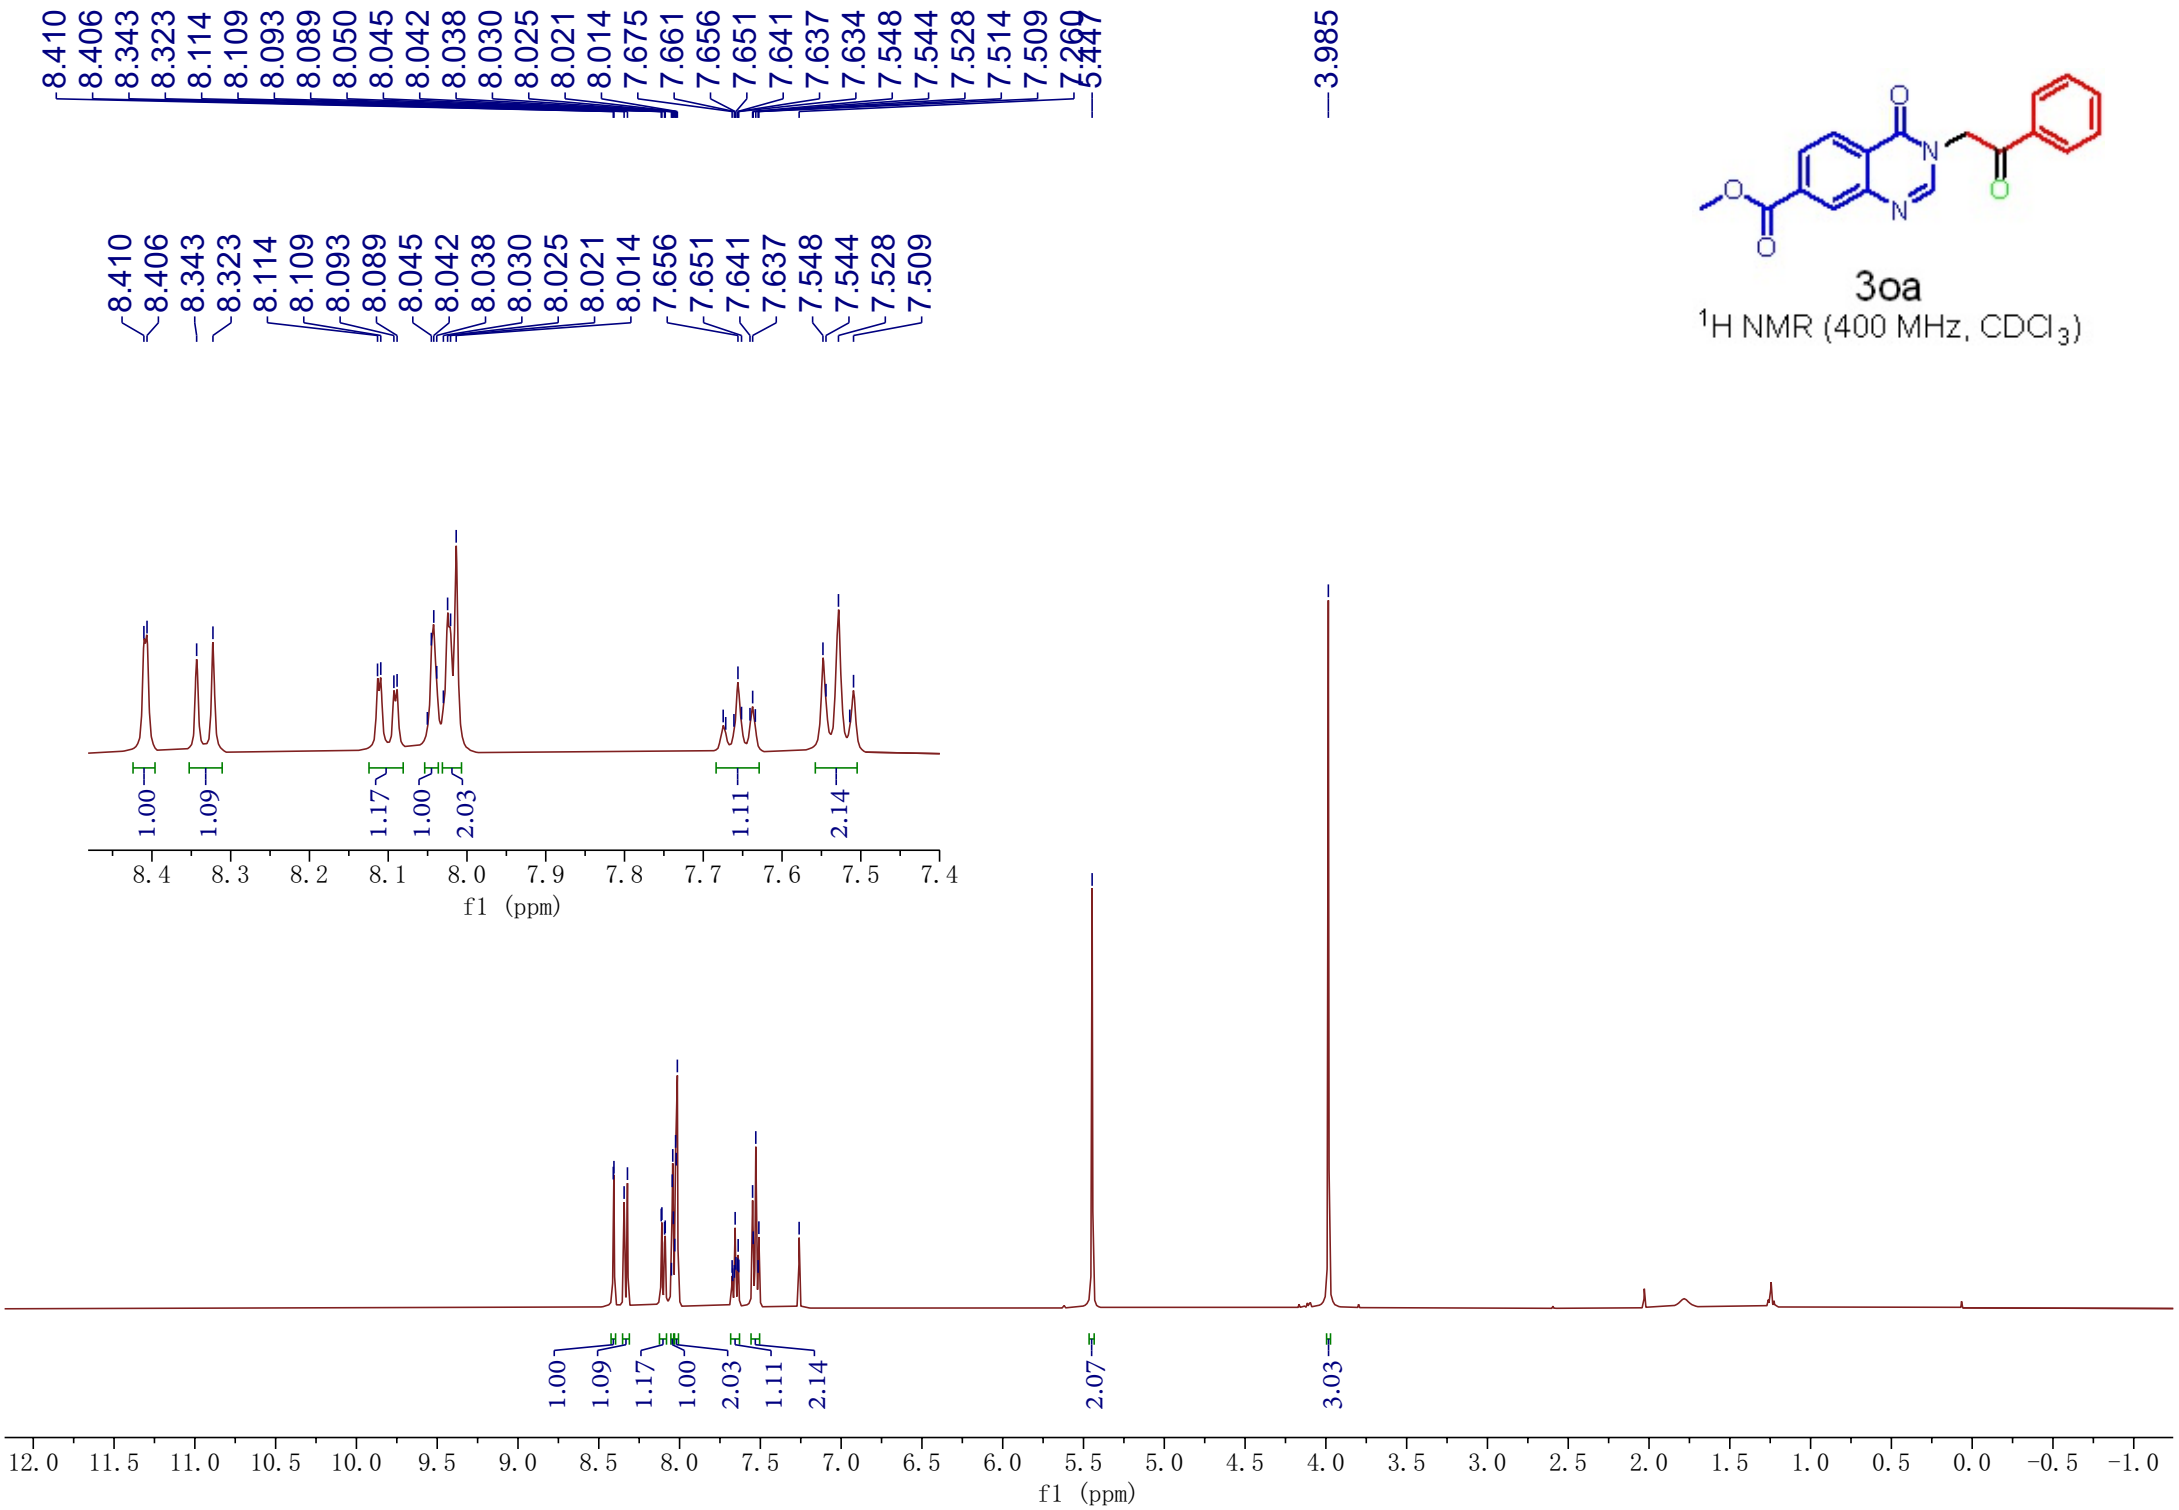

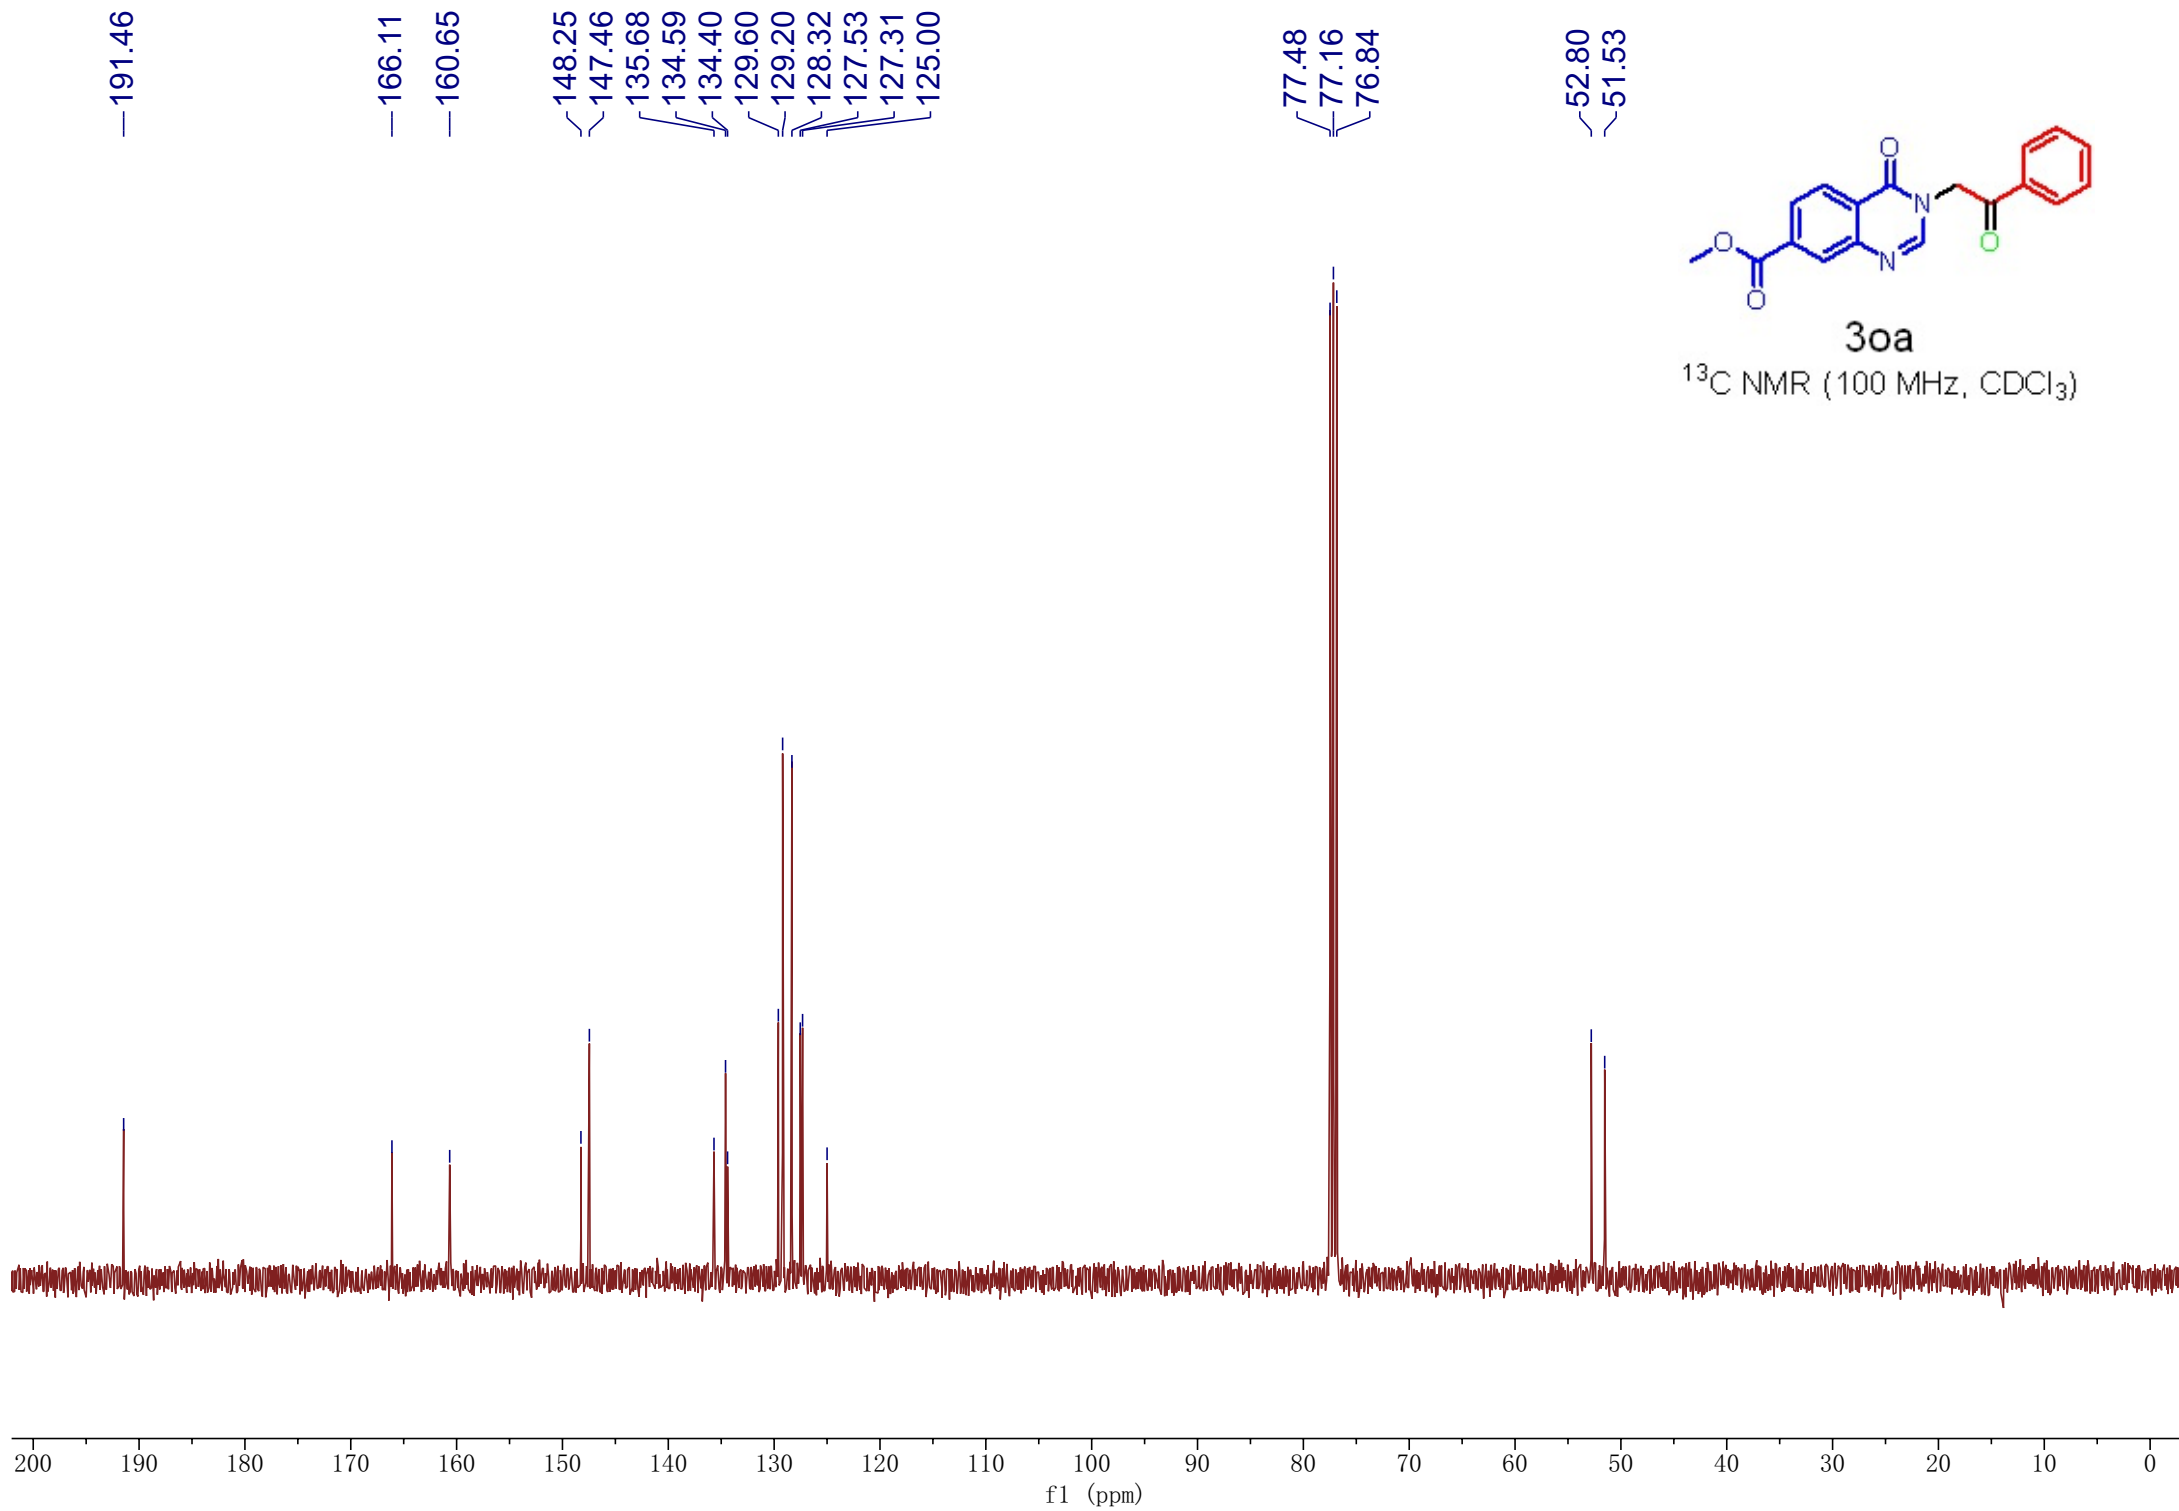

8.264  
8.260  
8.244  
8.241  
8.082  
8.064  
8.061  
8.045  
8.041  
8.030  
8.025  
8.021  
7.679  
7.676  
7.672  
7.662  
7.657  
7.653  
7.642  
7.639  
7.635  
7.550  
7.546  
7.530  
7.511  
7.381  
7.361  
7.341  
7.260  
5.441

8.264  
8.260  
8.244  
8.241  
8.082  
8.064  
8.061  
8.045  
8.041  
8.030  
8.025  
8.021  
8.021  
7.676  
7.672  
7.662  
7.657  
7.653  
7.642  
7.639  
7.635  
7.550  
7.546  
7.530  
7.511  
7.381  
7.361  
7.341

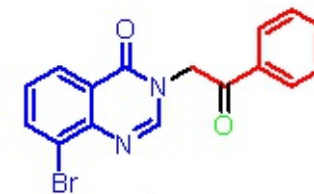

3pa

<sup>1</sup>H NMR (400 MHz, CDCl<sub>3</sub>)

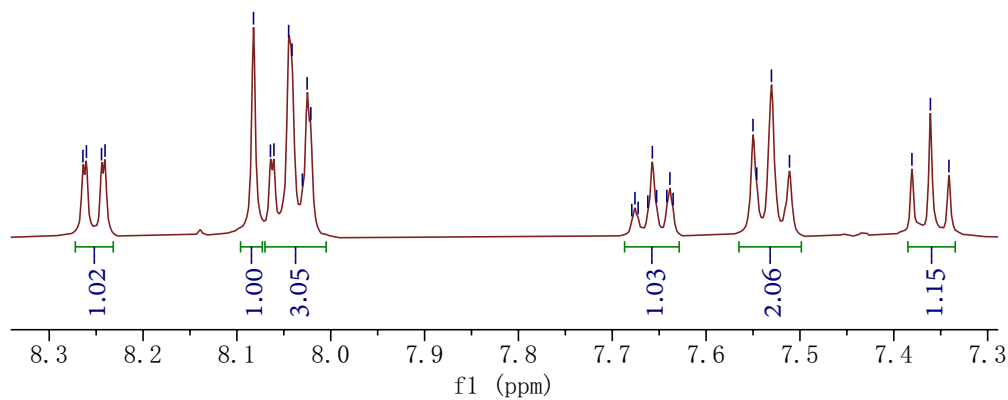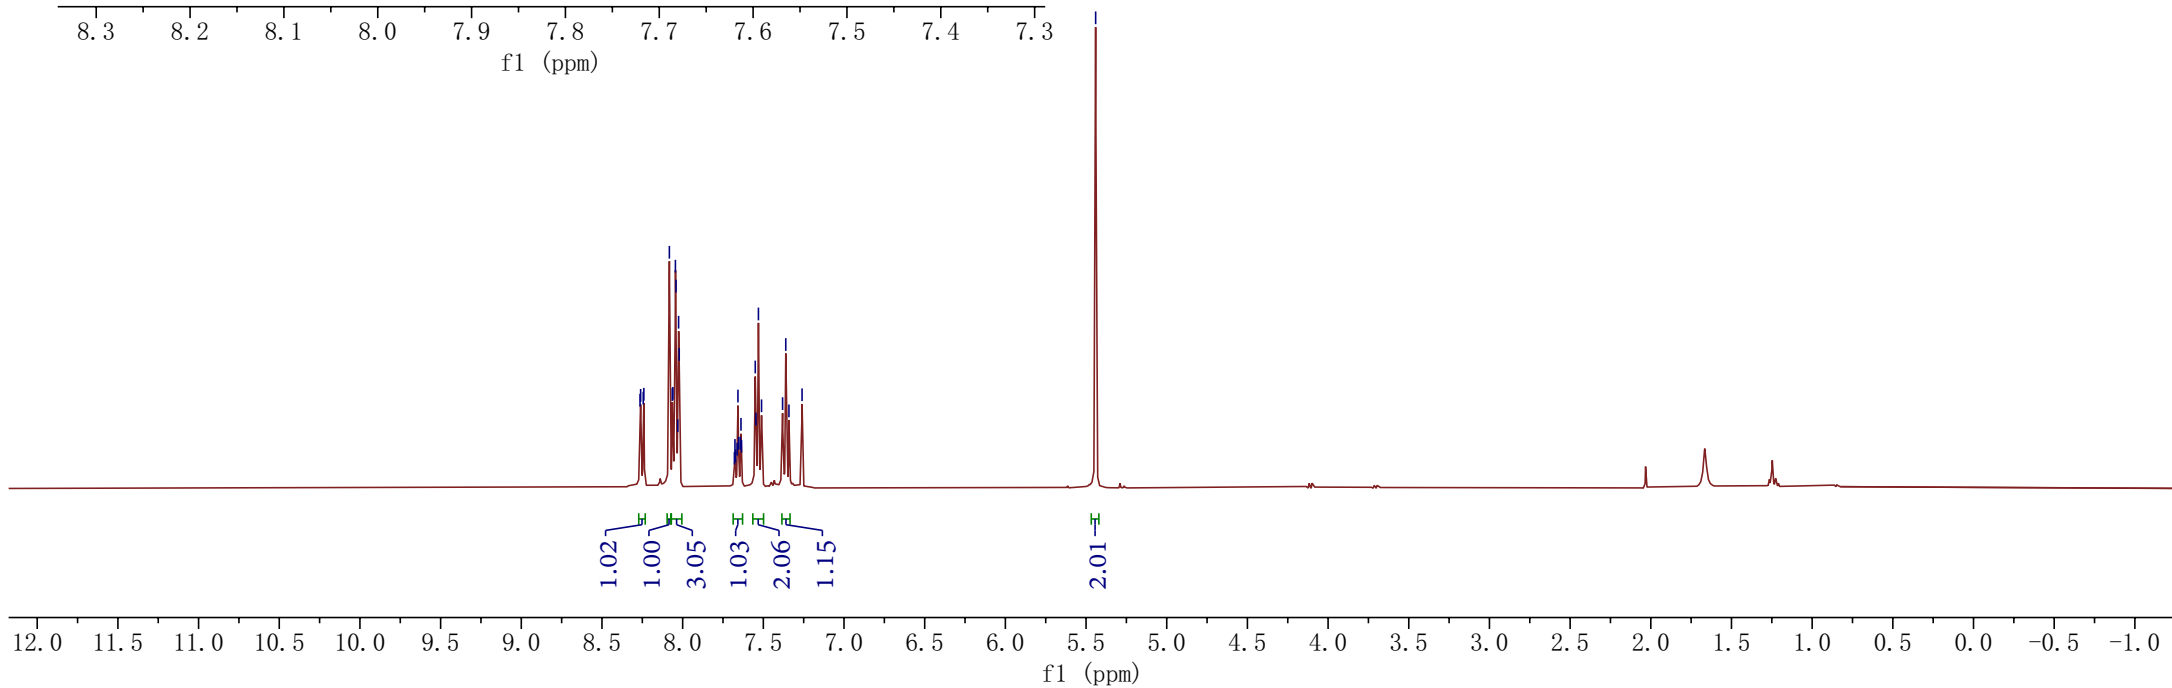

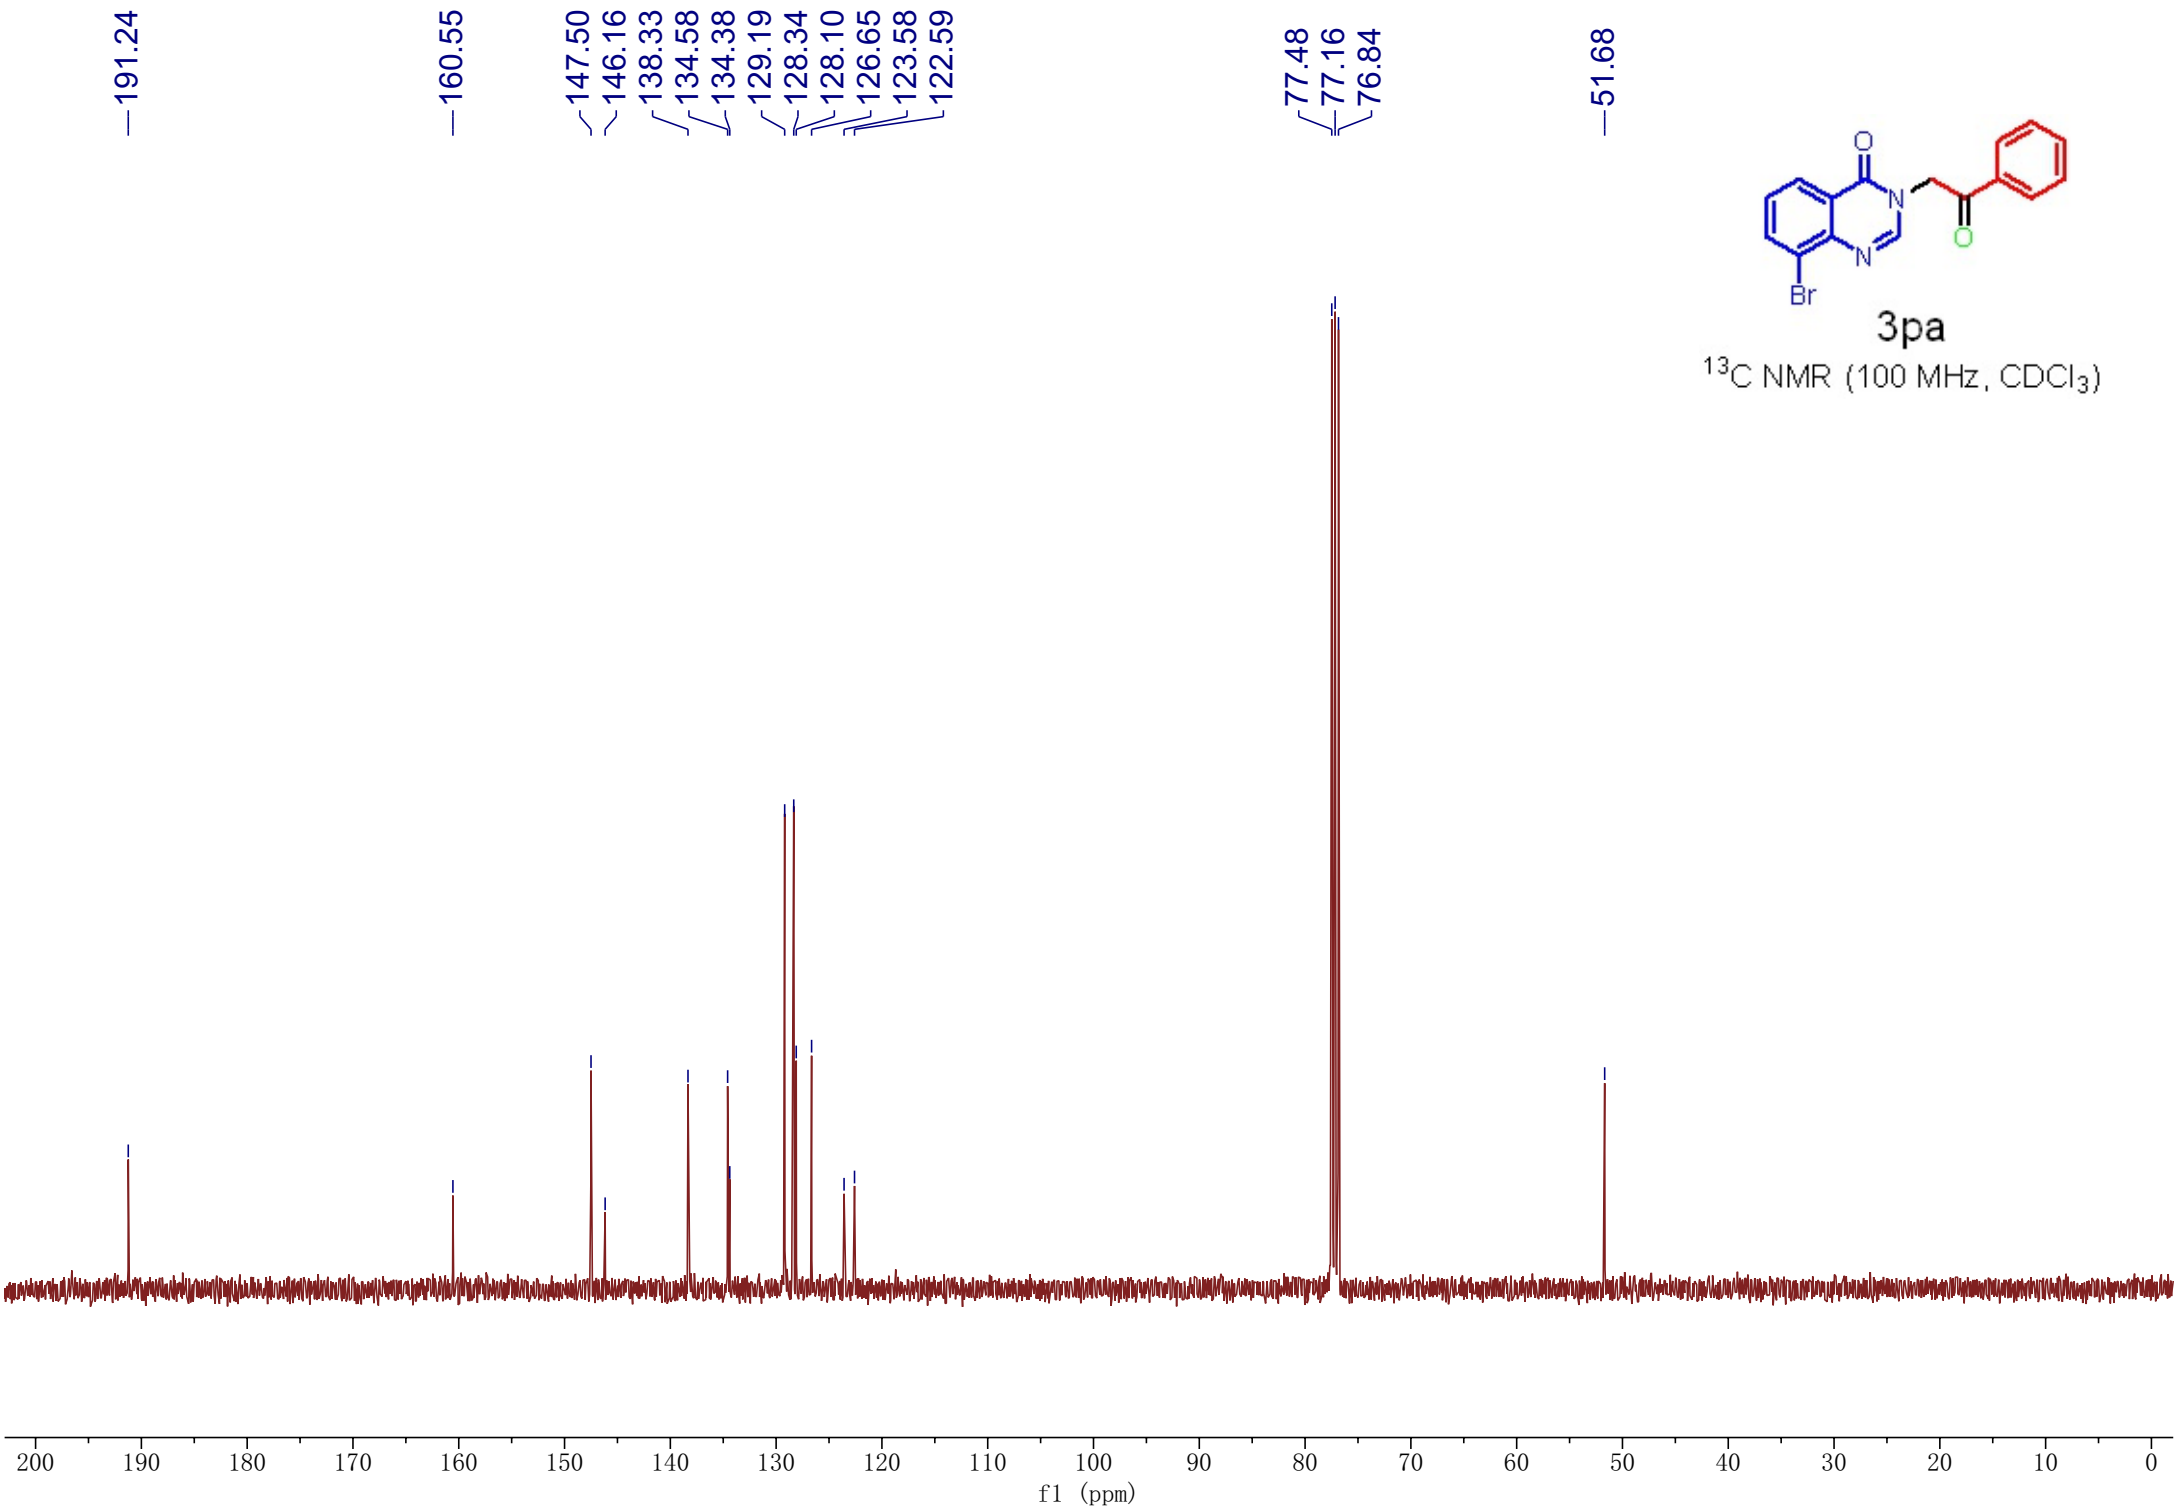



8.459  
8.101  
8.084  
8.080  
7.767  
7.764  
7.761  
7.745  
7.730  
7.727  
7.723  
7.723  
7.636  
7.616  
7.597  
7.474  
7.468  
7.451  
7.445  
7.440  
7.422  
7.416  
7.412  
7.406  
7.391  
7.387  
7.382  
-5.638

2.509  
2.505  
2.500  
2.495  
2.491

8.459  
8.101  
8.084  
8.080  
7.764  
7.745  
7.730  
7.727  
7.723  
7.636  
7.616  
7.597  
7.474  
7.468  
7.451  
7.445  
7.440  
7.422  
7.416  
7.412  
7.406  
7.391  
7.387  
7.382

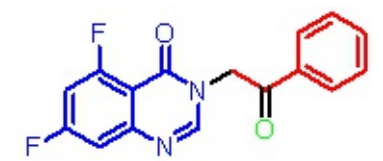

3qa

<sup>1</sup>H NMR (400 MHz, DMSO-d<sub>6</sub>)

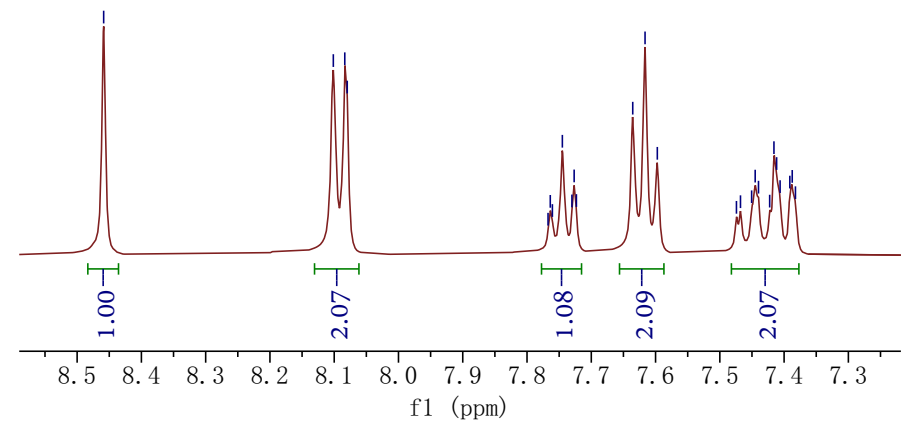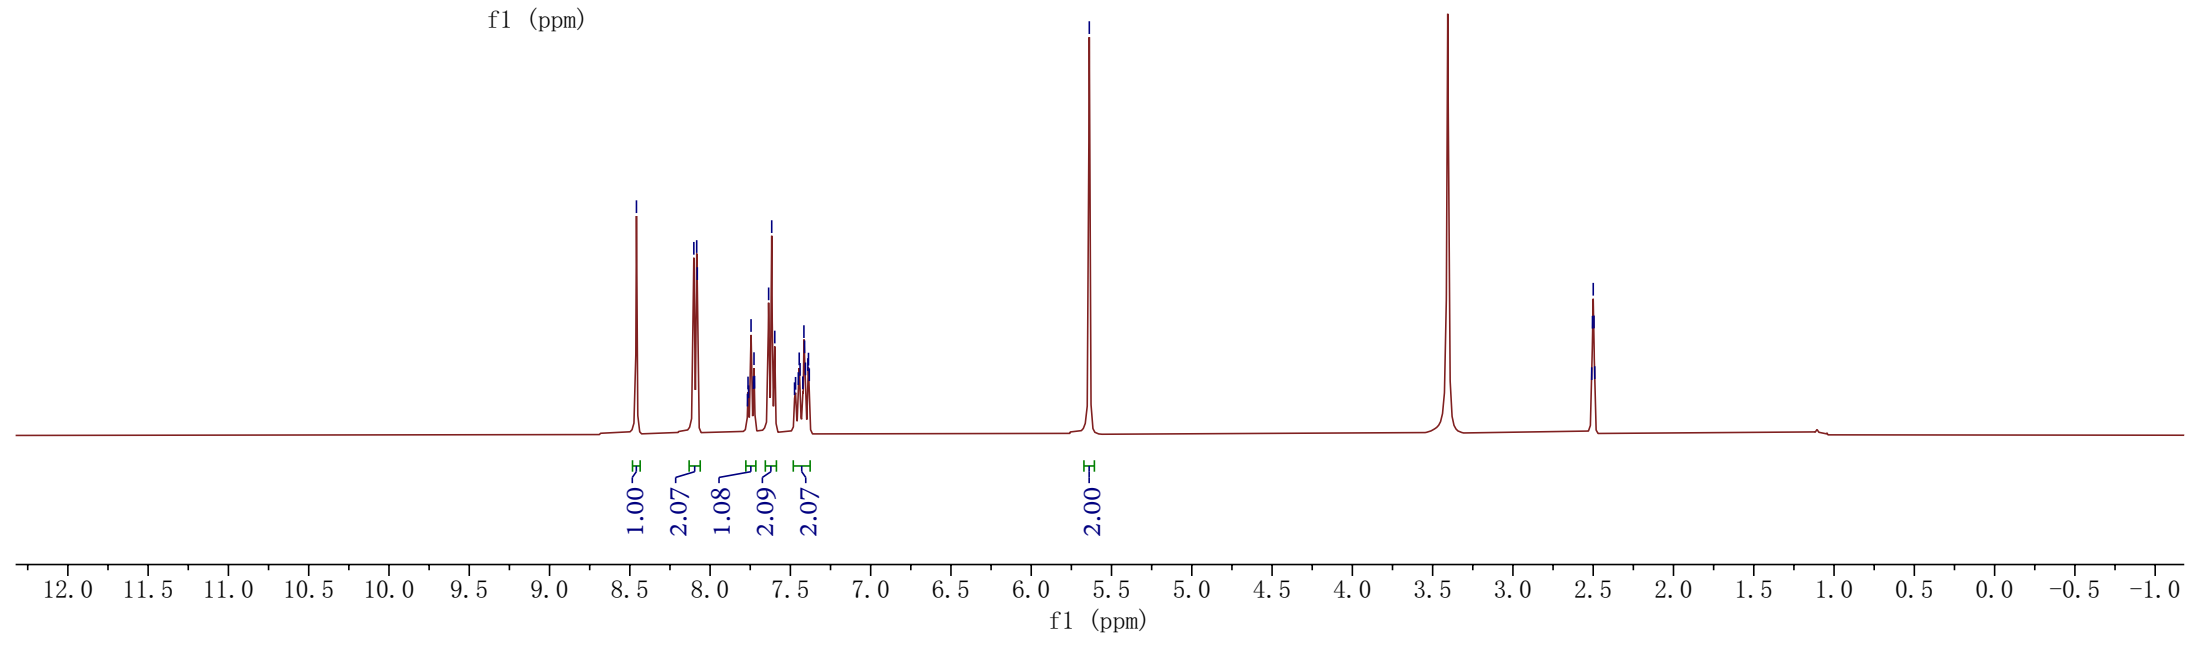

192.61  
166.43  
166.28  
163.93  
163.78  
163.00  
162.85  
160.36  
160.21  
156.58  
156.54  
151.64  
151.50  
150.45

134.31  
134.23  
129.09  
128.13  
109.32  
109.27  
109.10  
109.06  
108.37  
103.94  
103.68  
103.42

52.05  
40.15  
39.94  
39.73  
39.52  
39.31  
39.10  
38.89

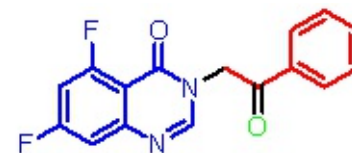

3qa

<sup>13</sup>C NMR (100 MHz, DMSO-d<sub>6</sub>)

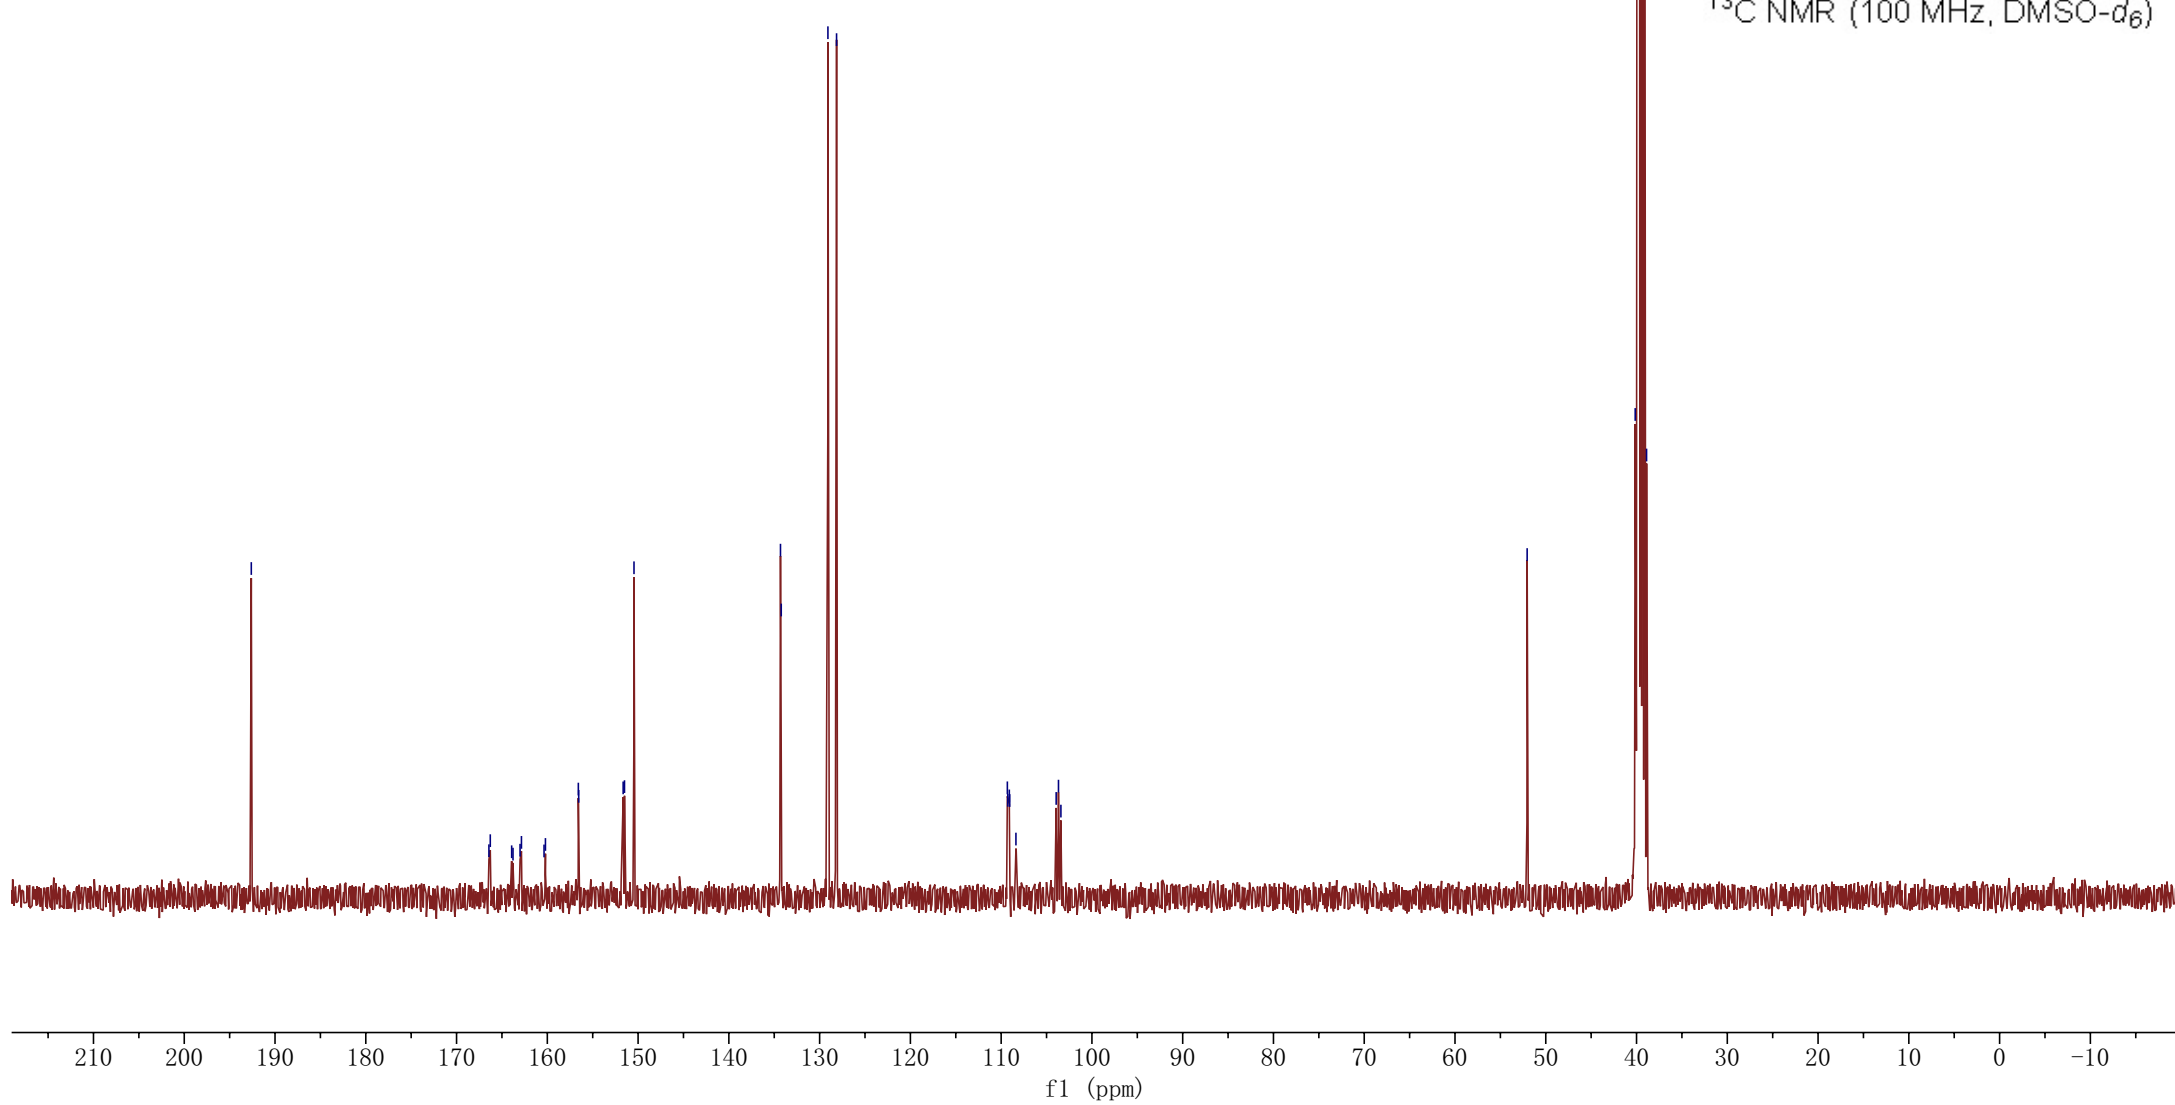

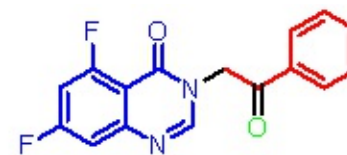

3qa

<sup>19</sup>F NMR (376 MHz, DMSO-*d*<sub>6</sub>)

-100.693  
-100.727  
-105.462  
-105.495

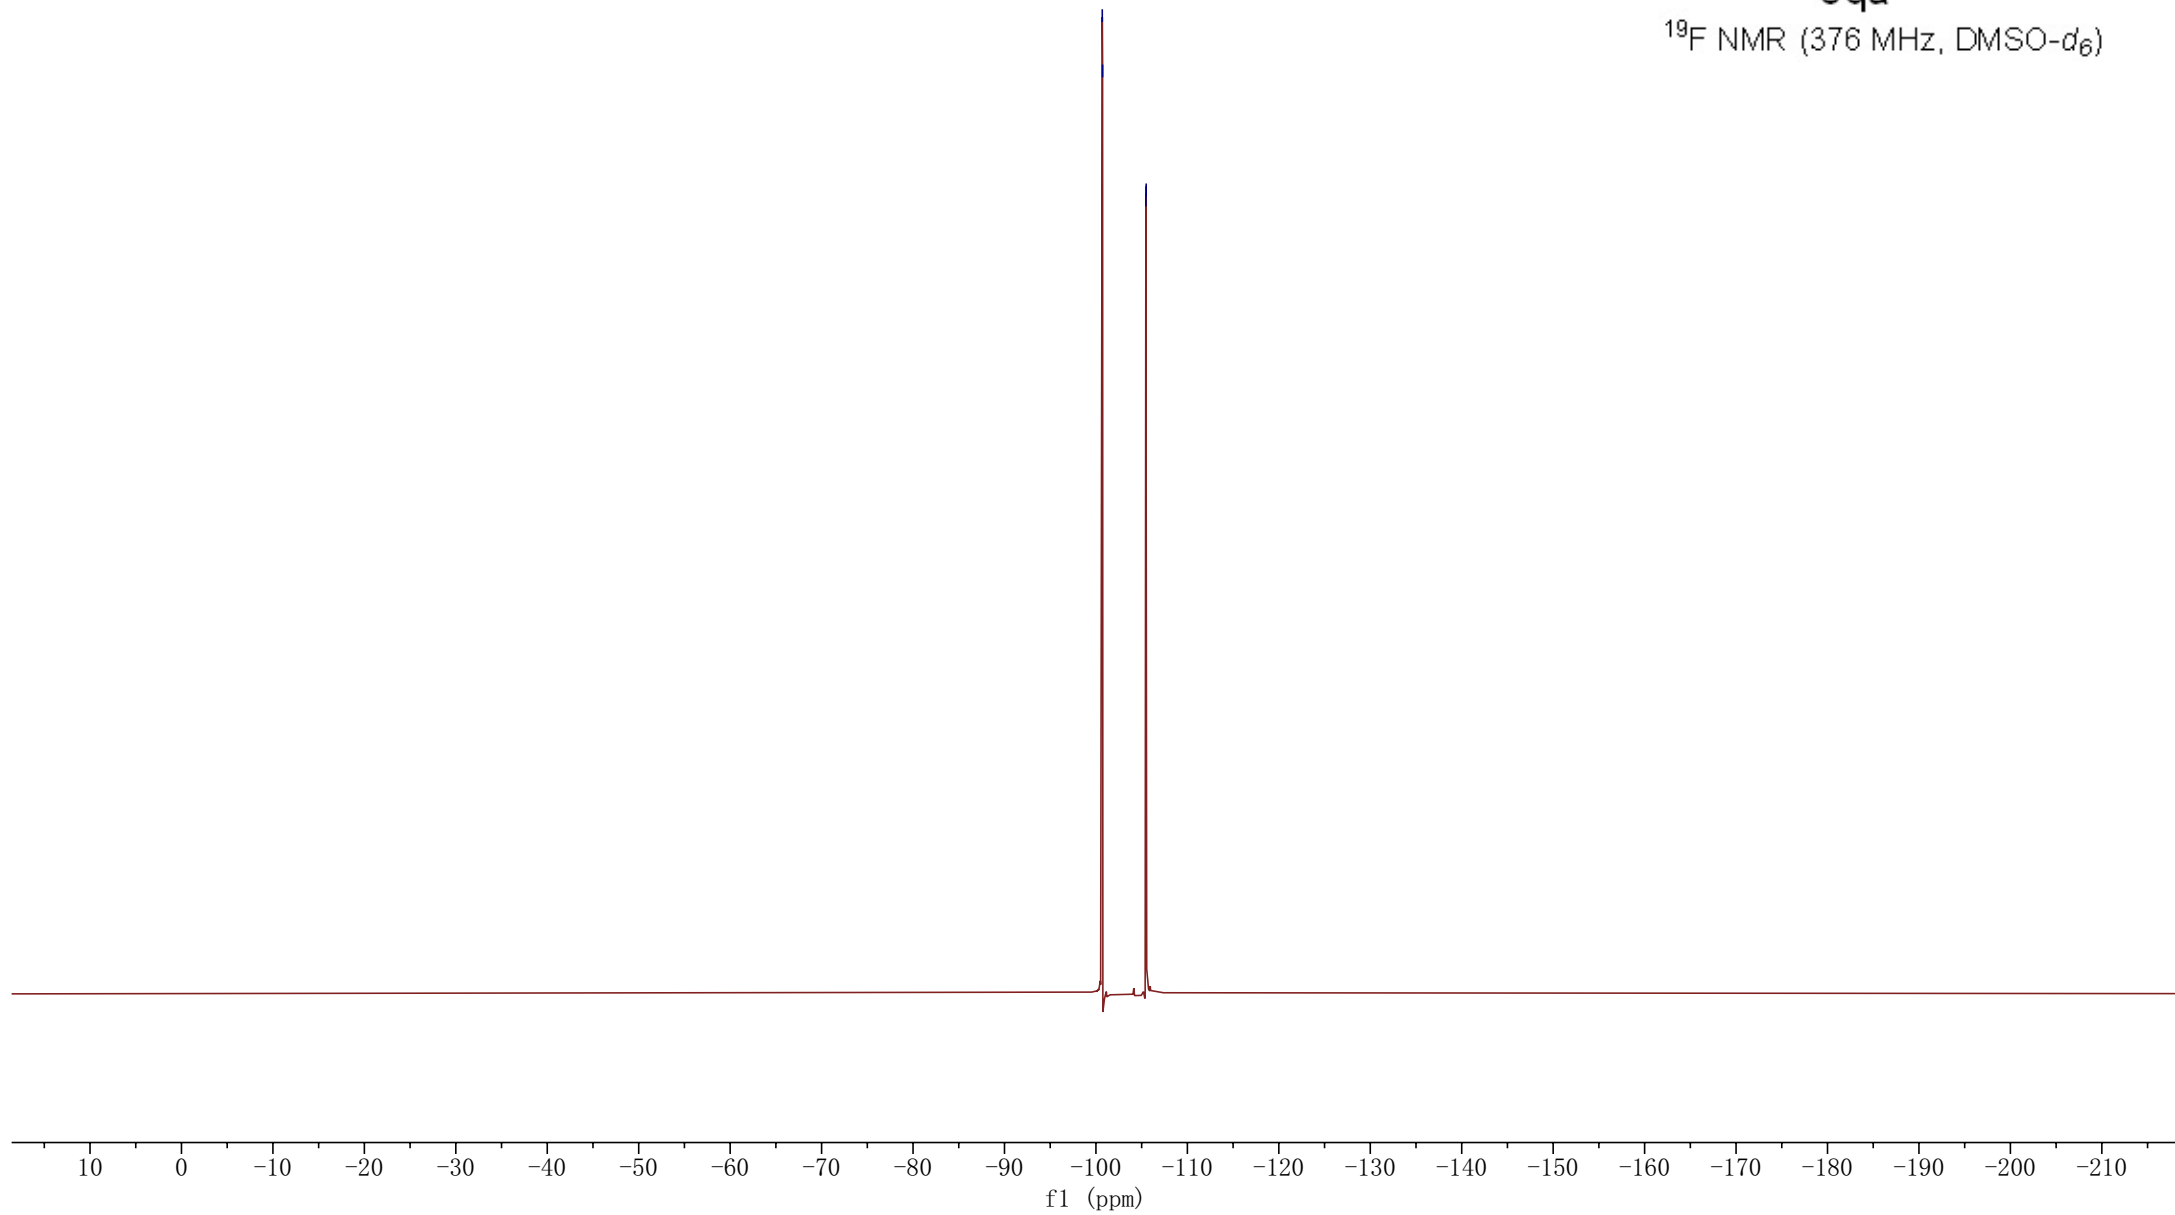

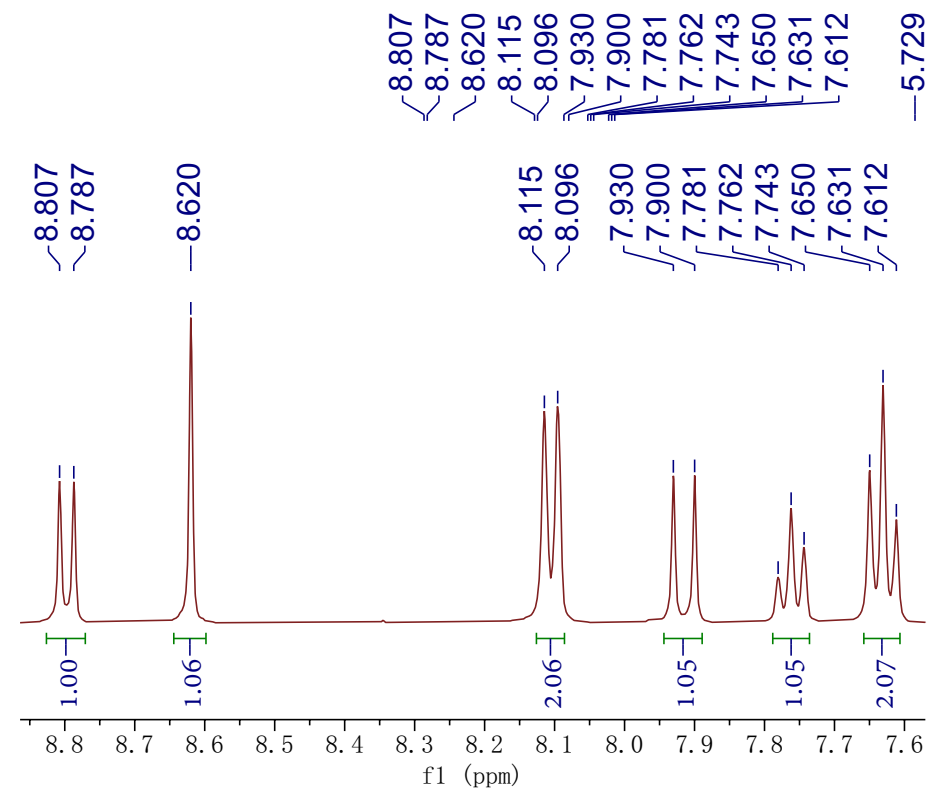

2.510  
2.505  
2.500  
2.495  
2.490

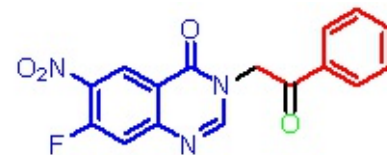

**3ra**

<sup>1</sup>H NMR (400 MHz, DMSO-d<sub>6</sub>)

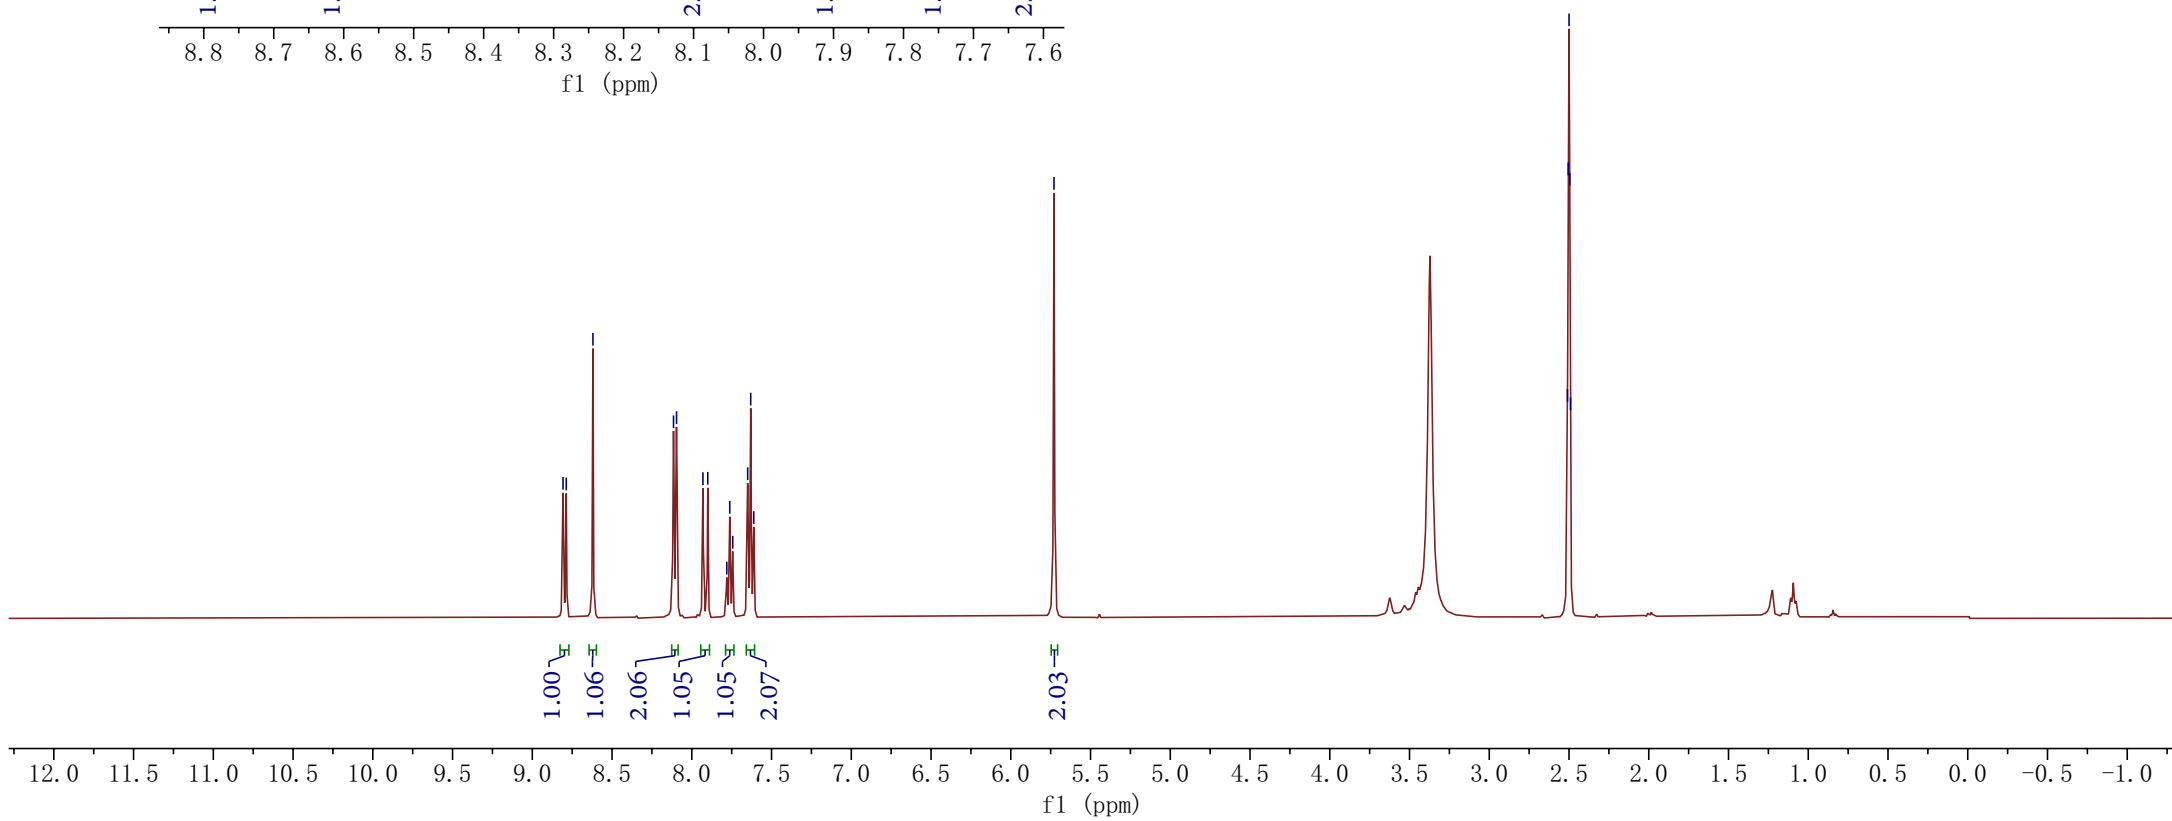

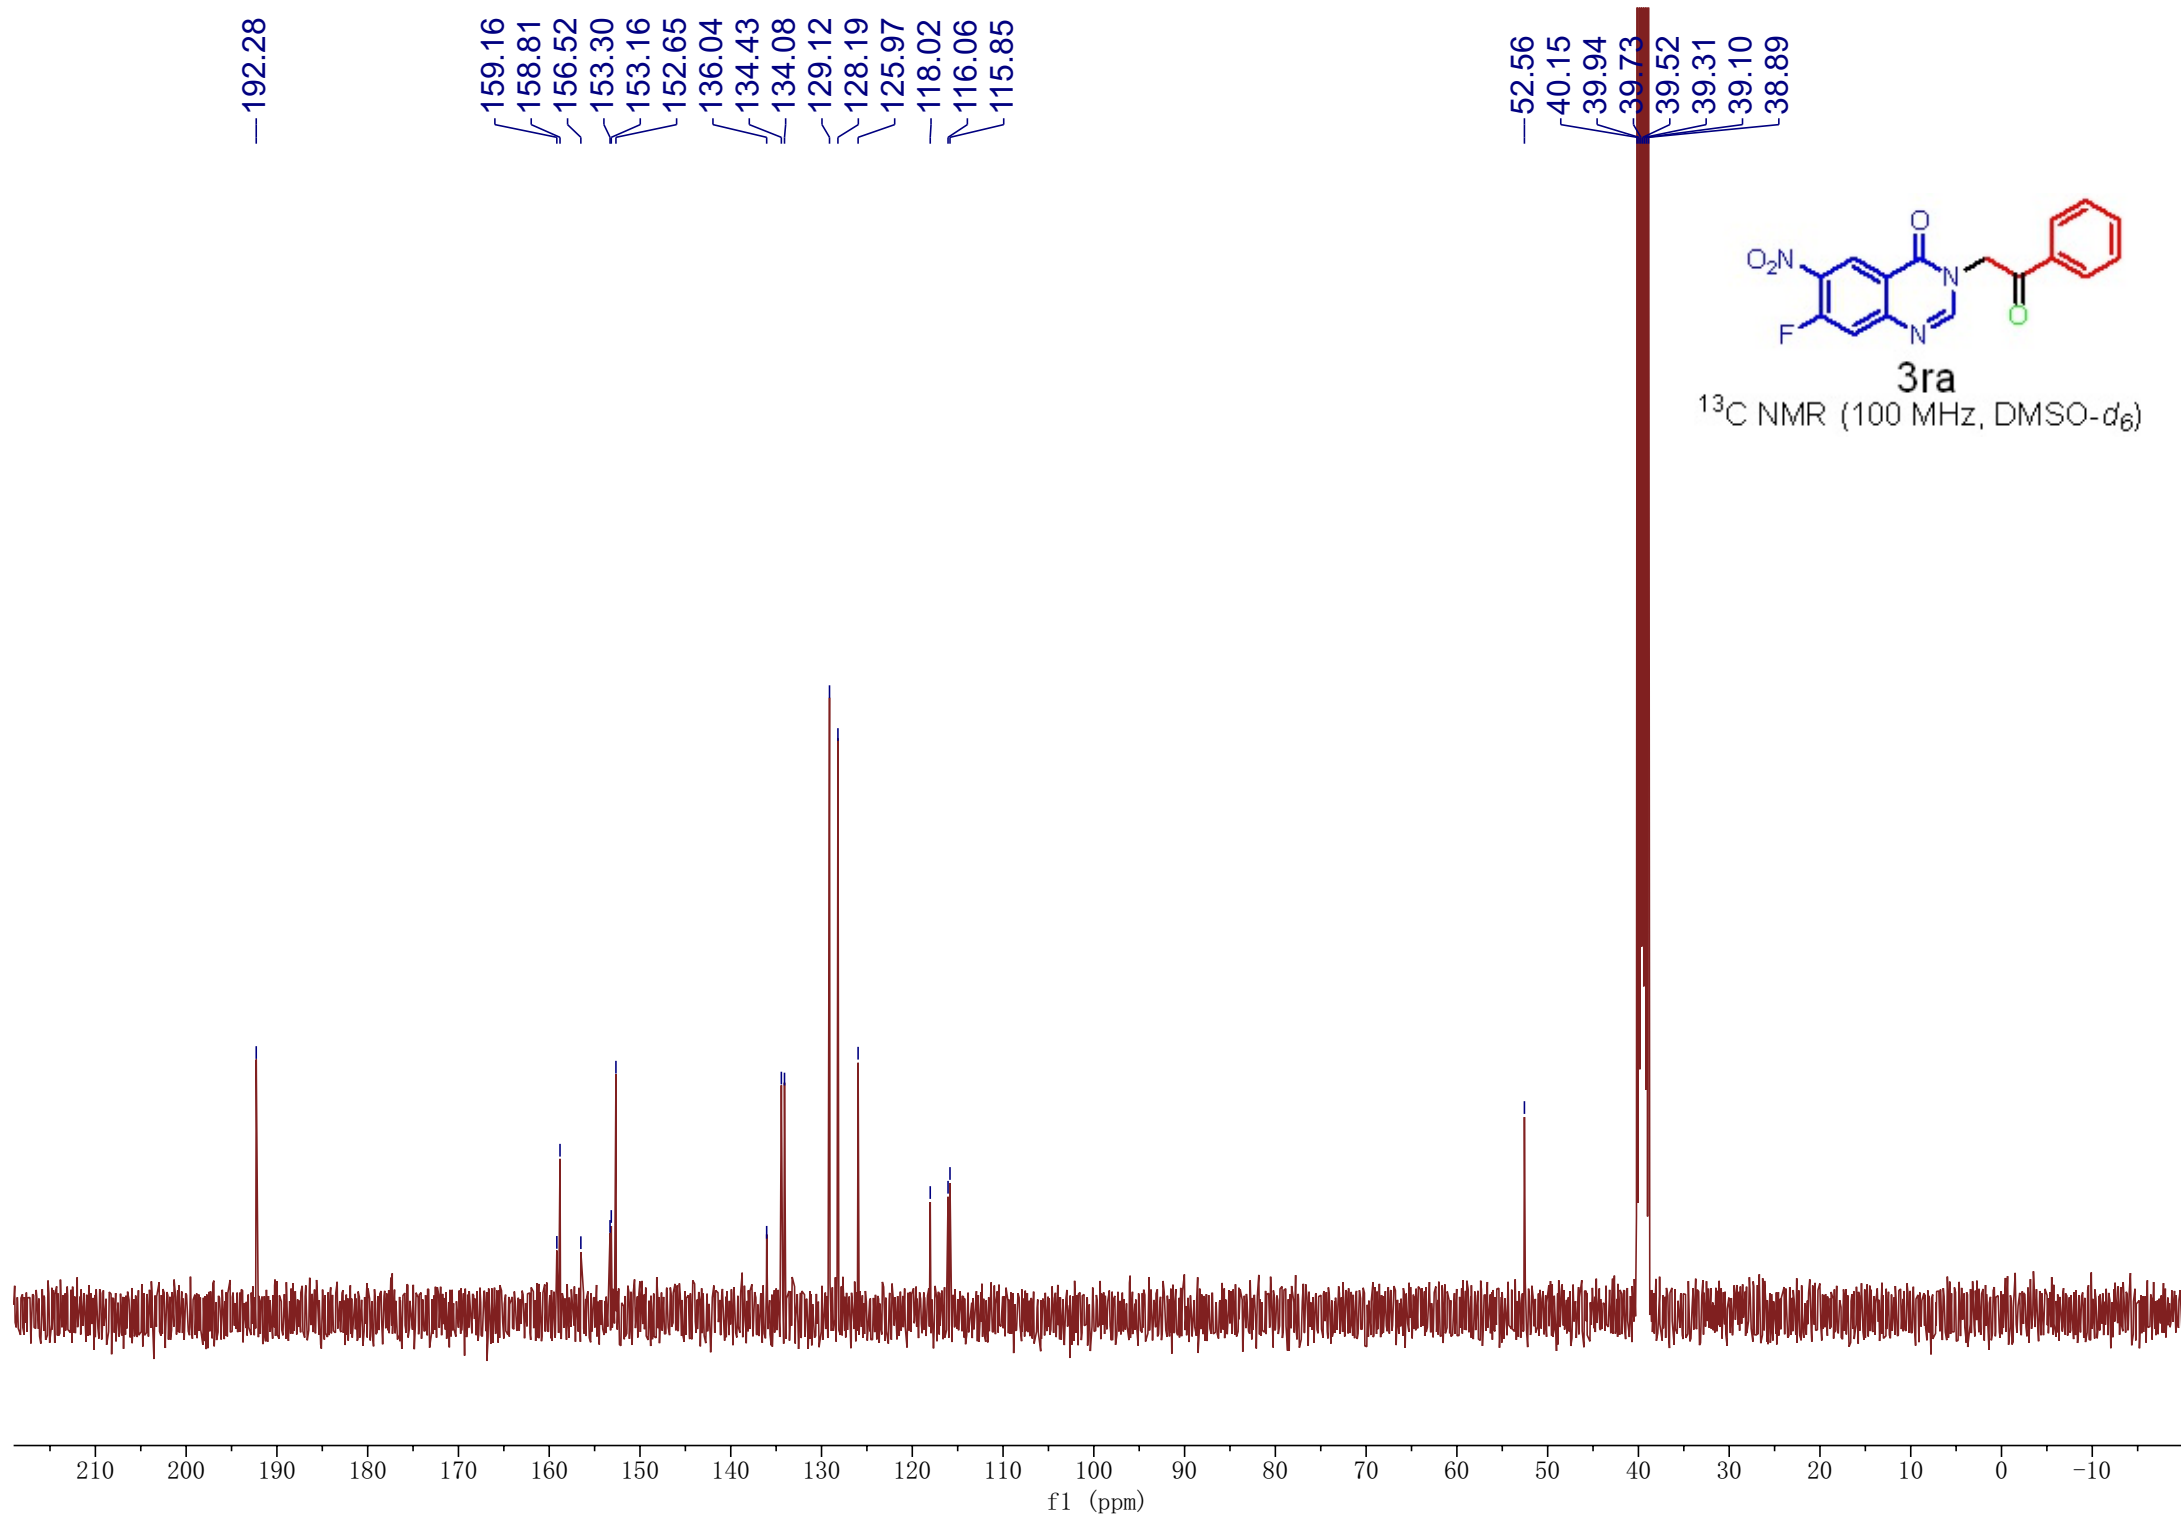

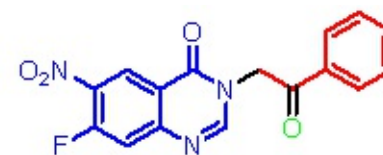

**3ra**

<sup>19</sup>F NMR (376 MHz, DMSO-*d*<sub>6</sub>)

--111.176

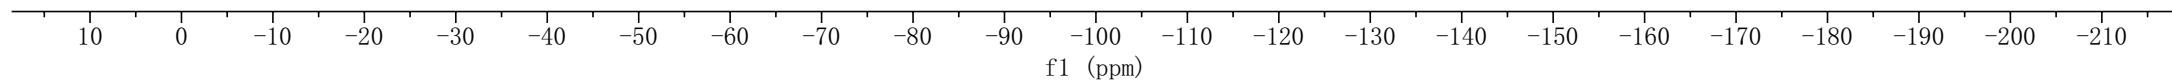

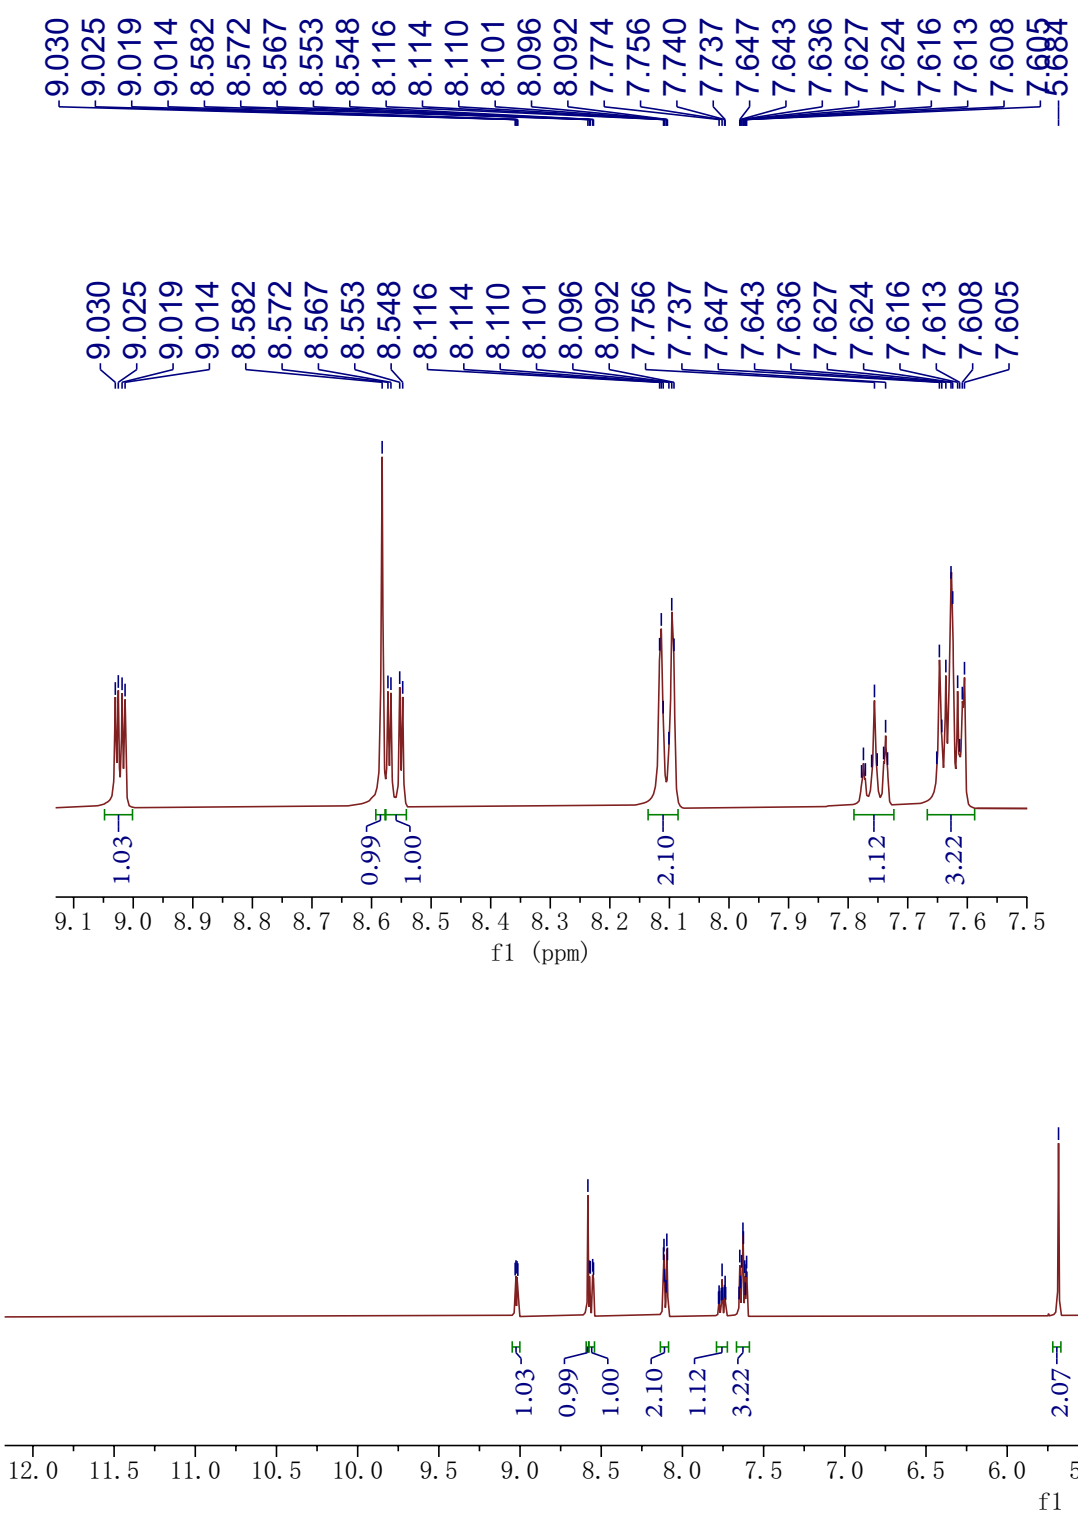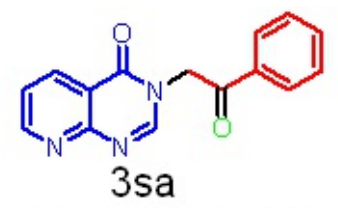

<sup>1</sup>H NMR (400 MHz, DMSO-*d*<sub>6</sub>)

2.509  
2.505  
2.500  
2.495  
2.491

—192.56

160.74  
—158.02  
156.17  
151.46

135.99  
134.38  
134.22  
129.13  
128.17  
123.06  
116.69

—52.32  
40.15  
39.94  
39.73  
39.52  
39.31  
39.10  
38.89

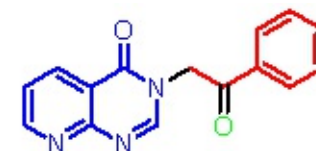

3sa

<sup>13</sup>C NMR (100 MHz, DMSO-*d*<sub>6</sub>)

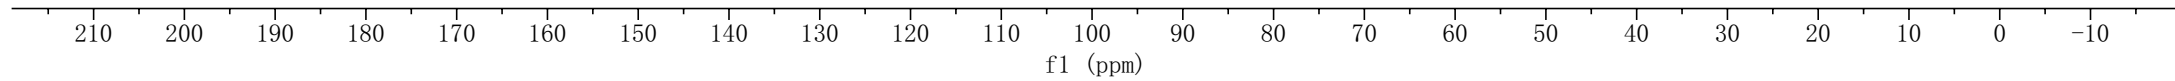



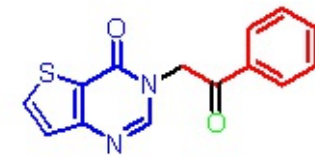

3ta

<sup>1</sup>H NMR (400 MHz, CDCl<sub>3</sub>)

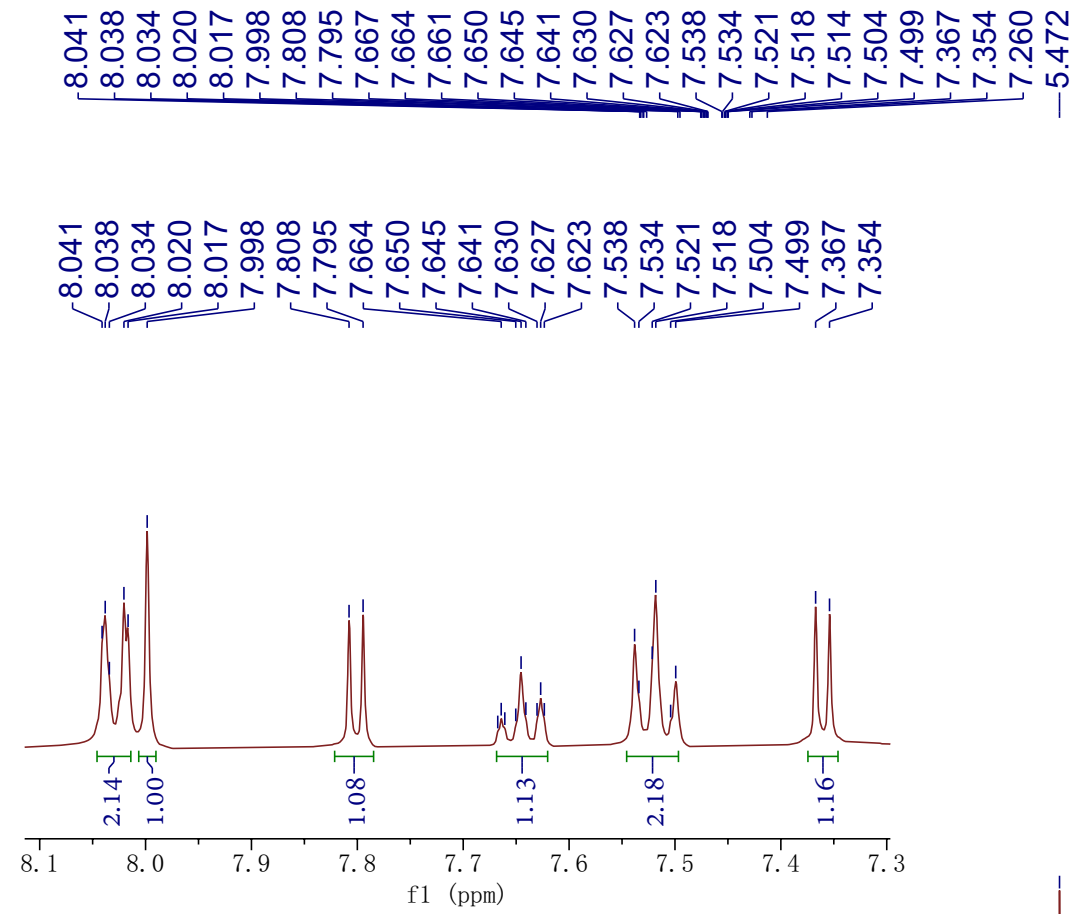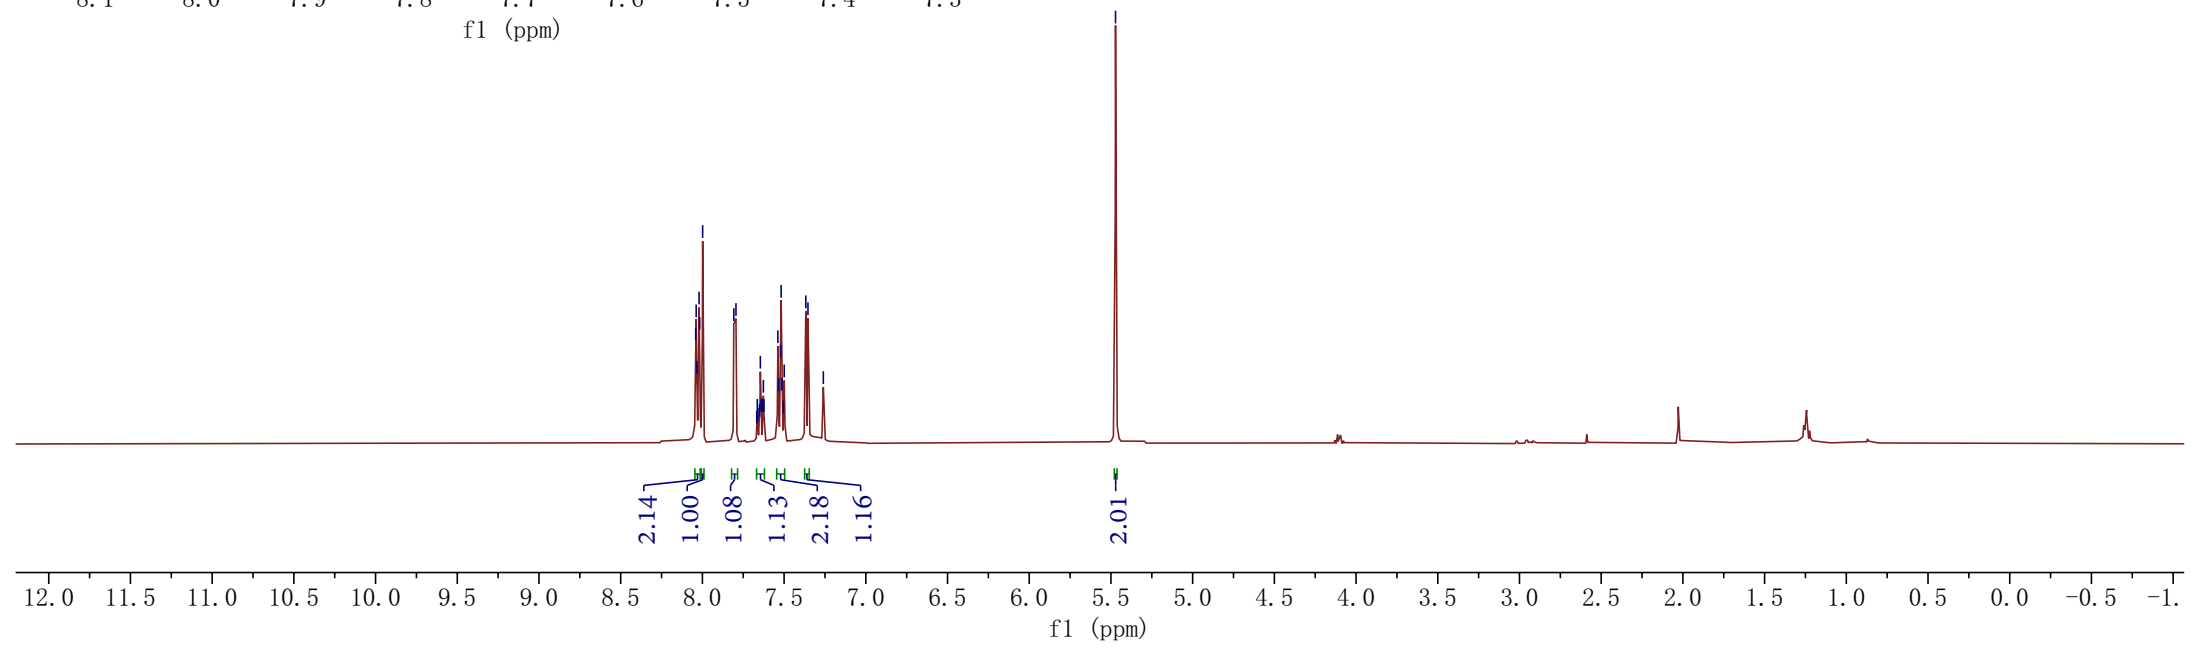

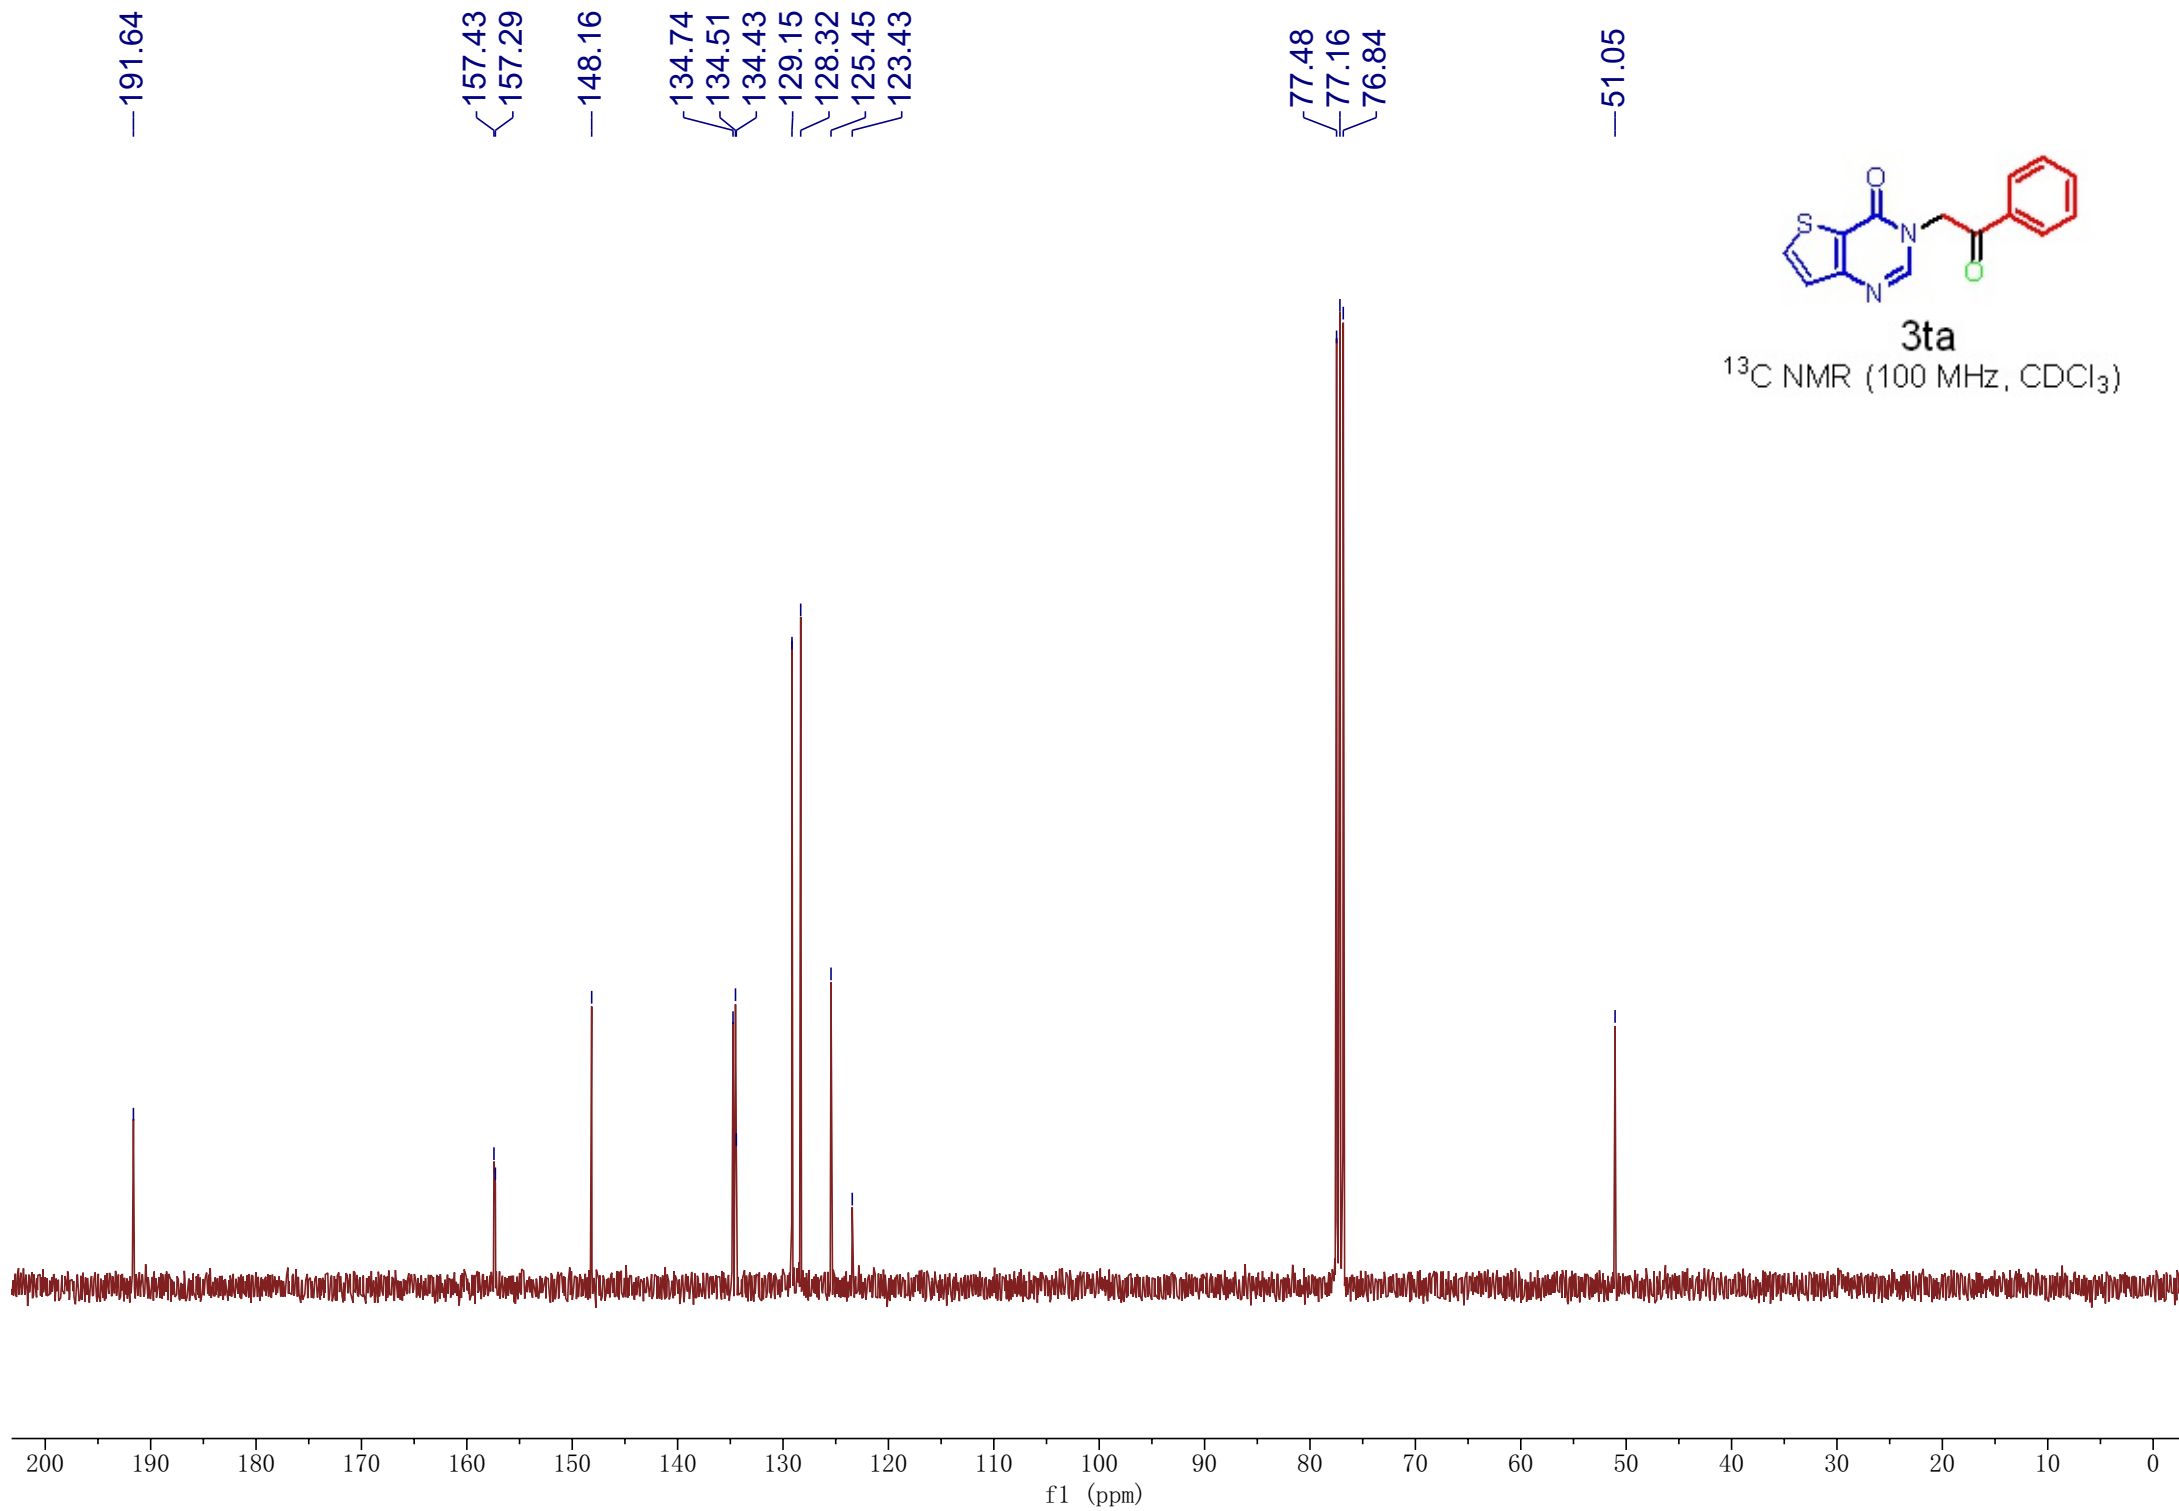

8.024 8.019 8.016 8.012 8.004 7.999 7.995 7.851 7.644 7.641 7.638 7.627 7.623 7.618 7.607 7.604 7.601 7.513 7.509 7.497 7.493 7.489 7.479 7.475 7.471 7.260 5.387 3.036 3.032 3.027 3.018 3.014 3.011 3.009 3.006 3.000 2.995 2.991 2.965 2.960 2.956 2.947 2.943 2.938 2.928 2.923 2.919 2.467 2.451 2.448 2.442 2.439 2.434 2.430 2.427 2.420 2.414 2.411 2.393

8.024 8.019 8.016 8.012 8.004 7.999 7.995 7.851 7.641 7.638 7.627 7.623 7.618 7.607 7.604 7.601 7.513 7.509 7.497 7.493 7.489 7.479 7.475 7.471

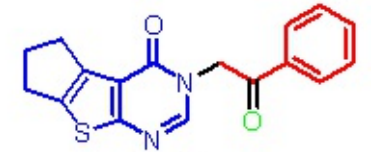

3ua

<sup>1</sup>H NMR (400 MHz, CDCl<sub>3</sub>)

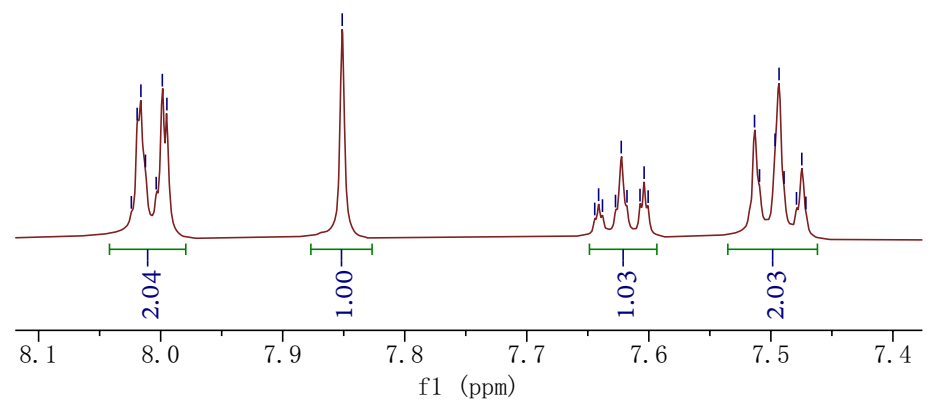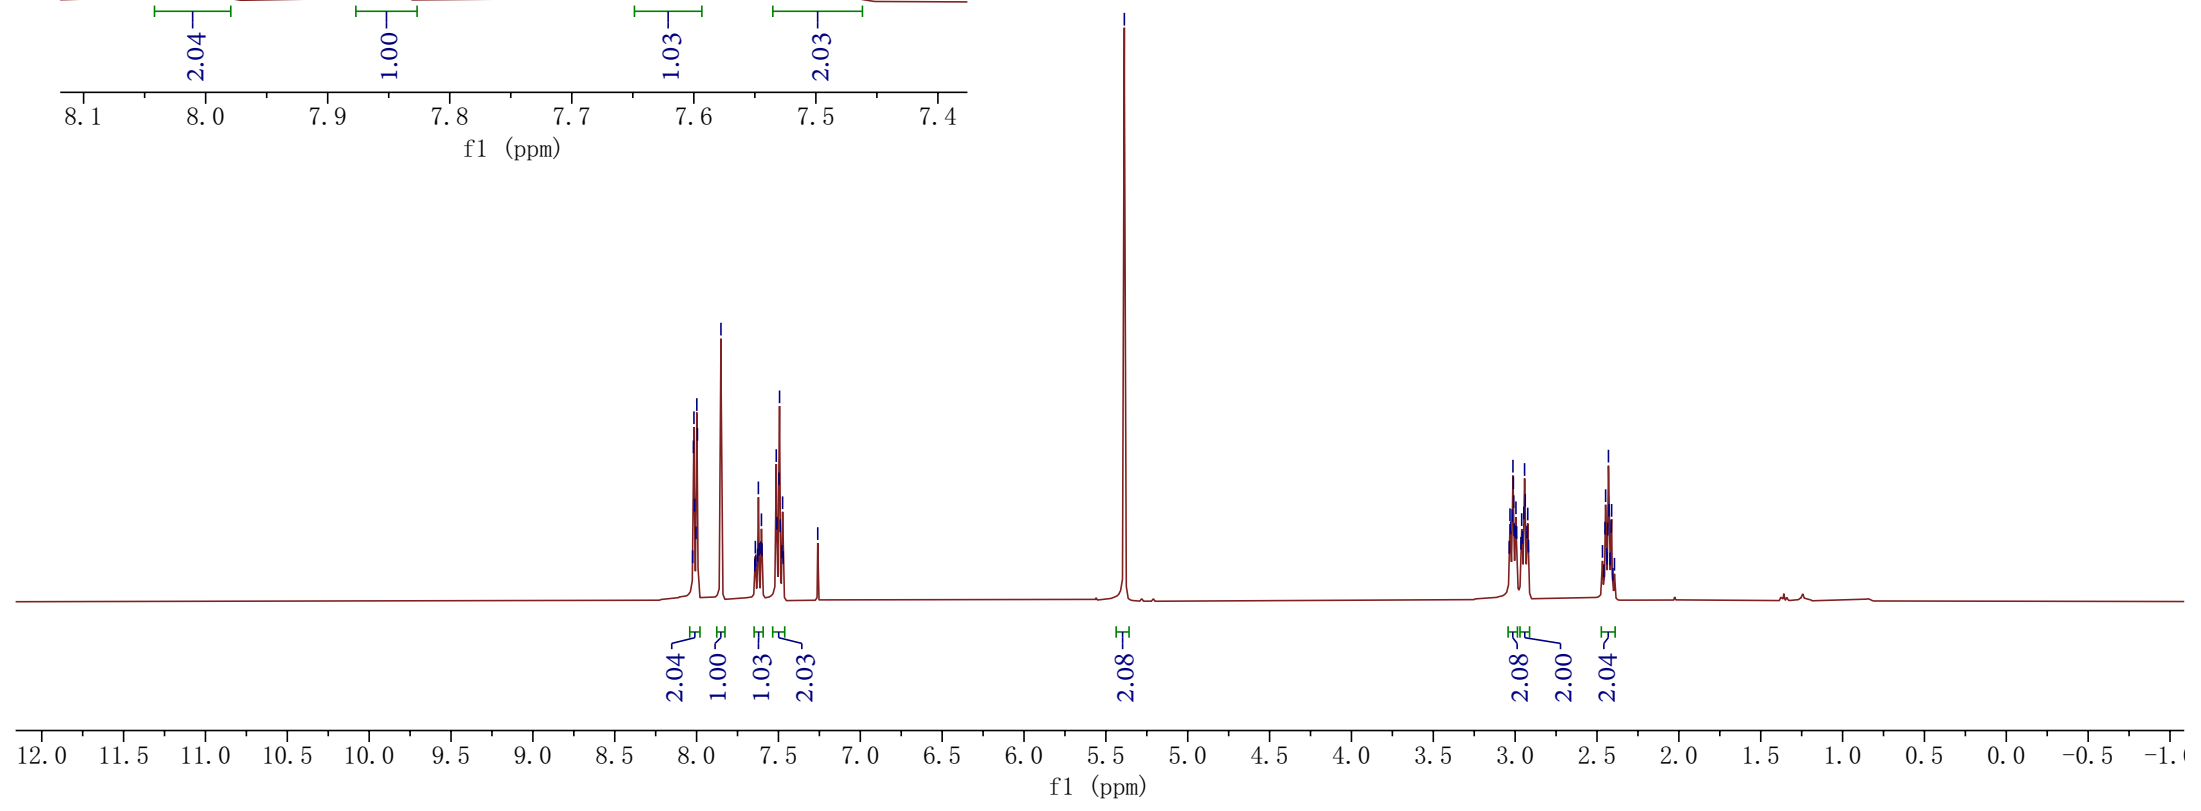

—191.81

—167.44

—157.46

145.69

140.47

139.96

134.46

134.38

129.07

128.28

—120.24

77.48

77.16

76.84

—51.07

29.72

29.02

28.11

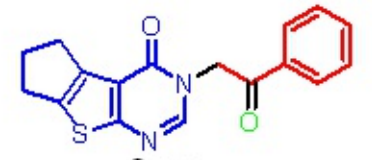

3ua

<sup>13</sup>C NMR (100 MHz, CDCl<sub>3</sub>)

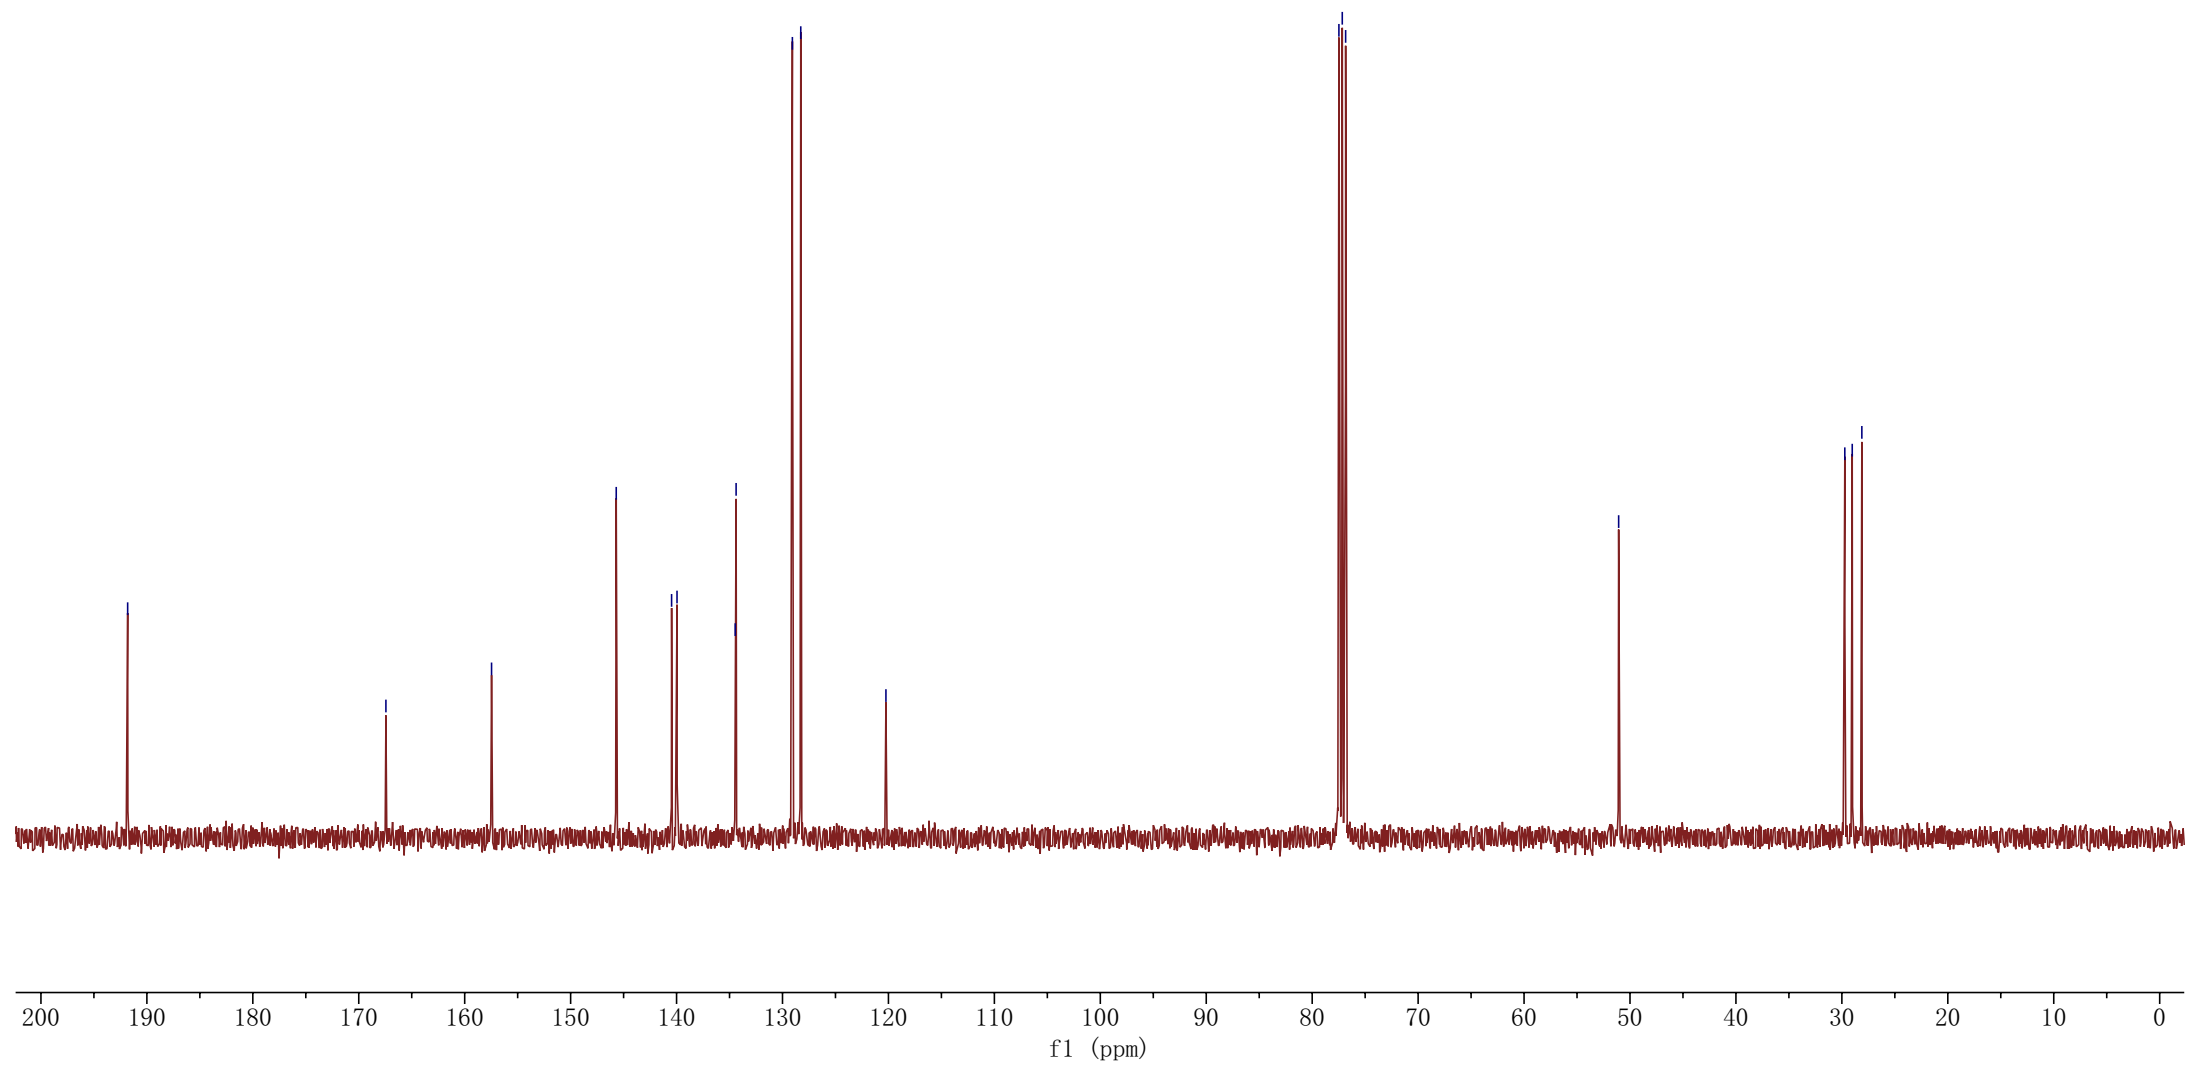

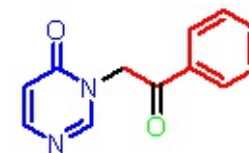

3va

<sup>1</sup>H NMR (400 MHz, CDCl<sub>3</sub>)

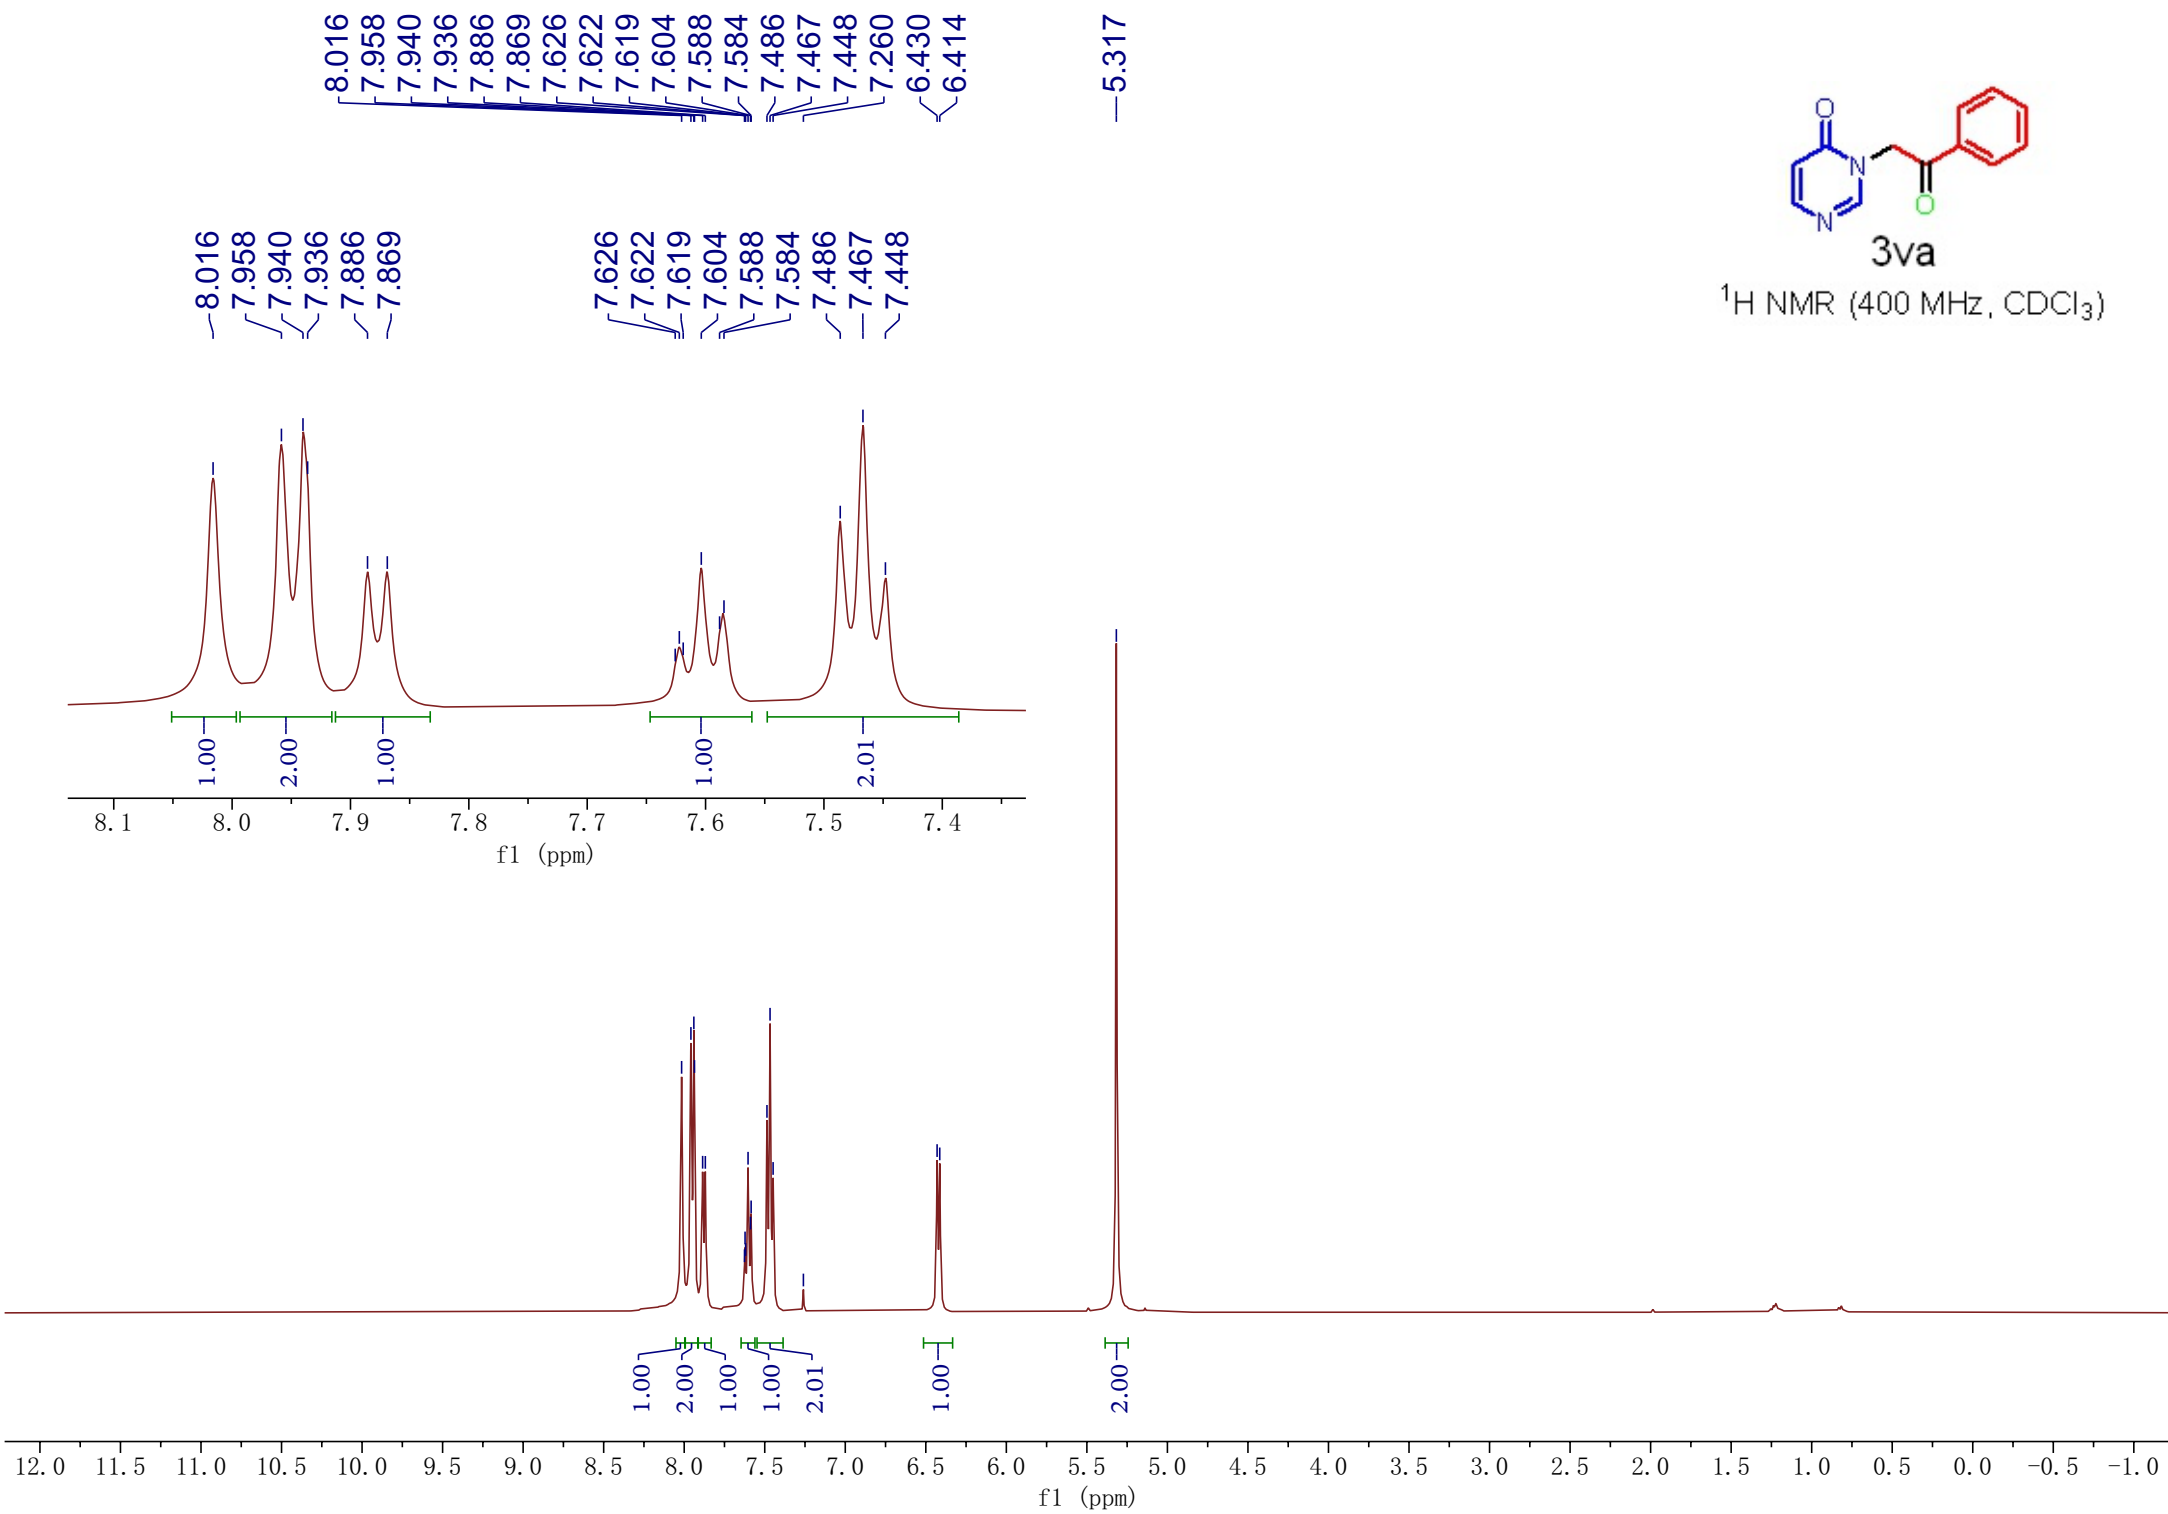

—191.12

—160.63

~153.76

~151.92

{134.44

{134.18

{129.04

{128.18

—115.75

{77.48

{77.16

{76.84

—51.32

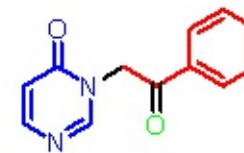

3va

<sup>13</sup>C NMR (100 MHz, CDCl<sub>3</sub>)

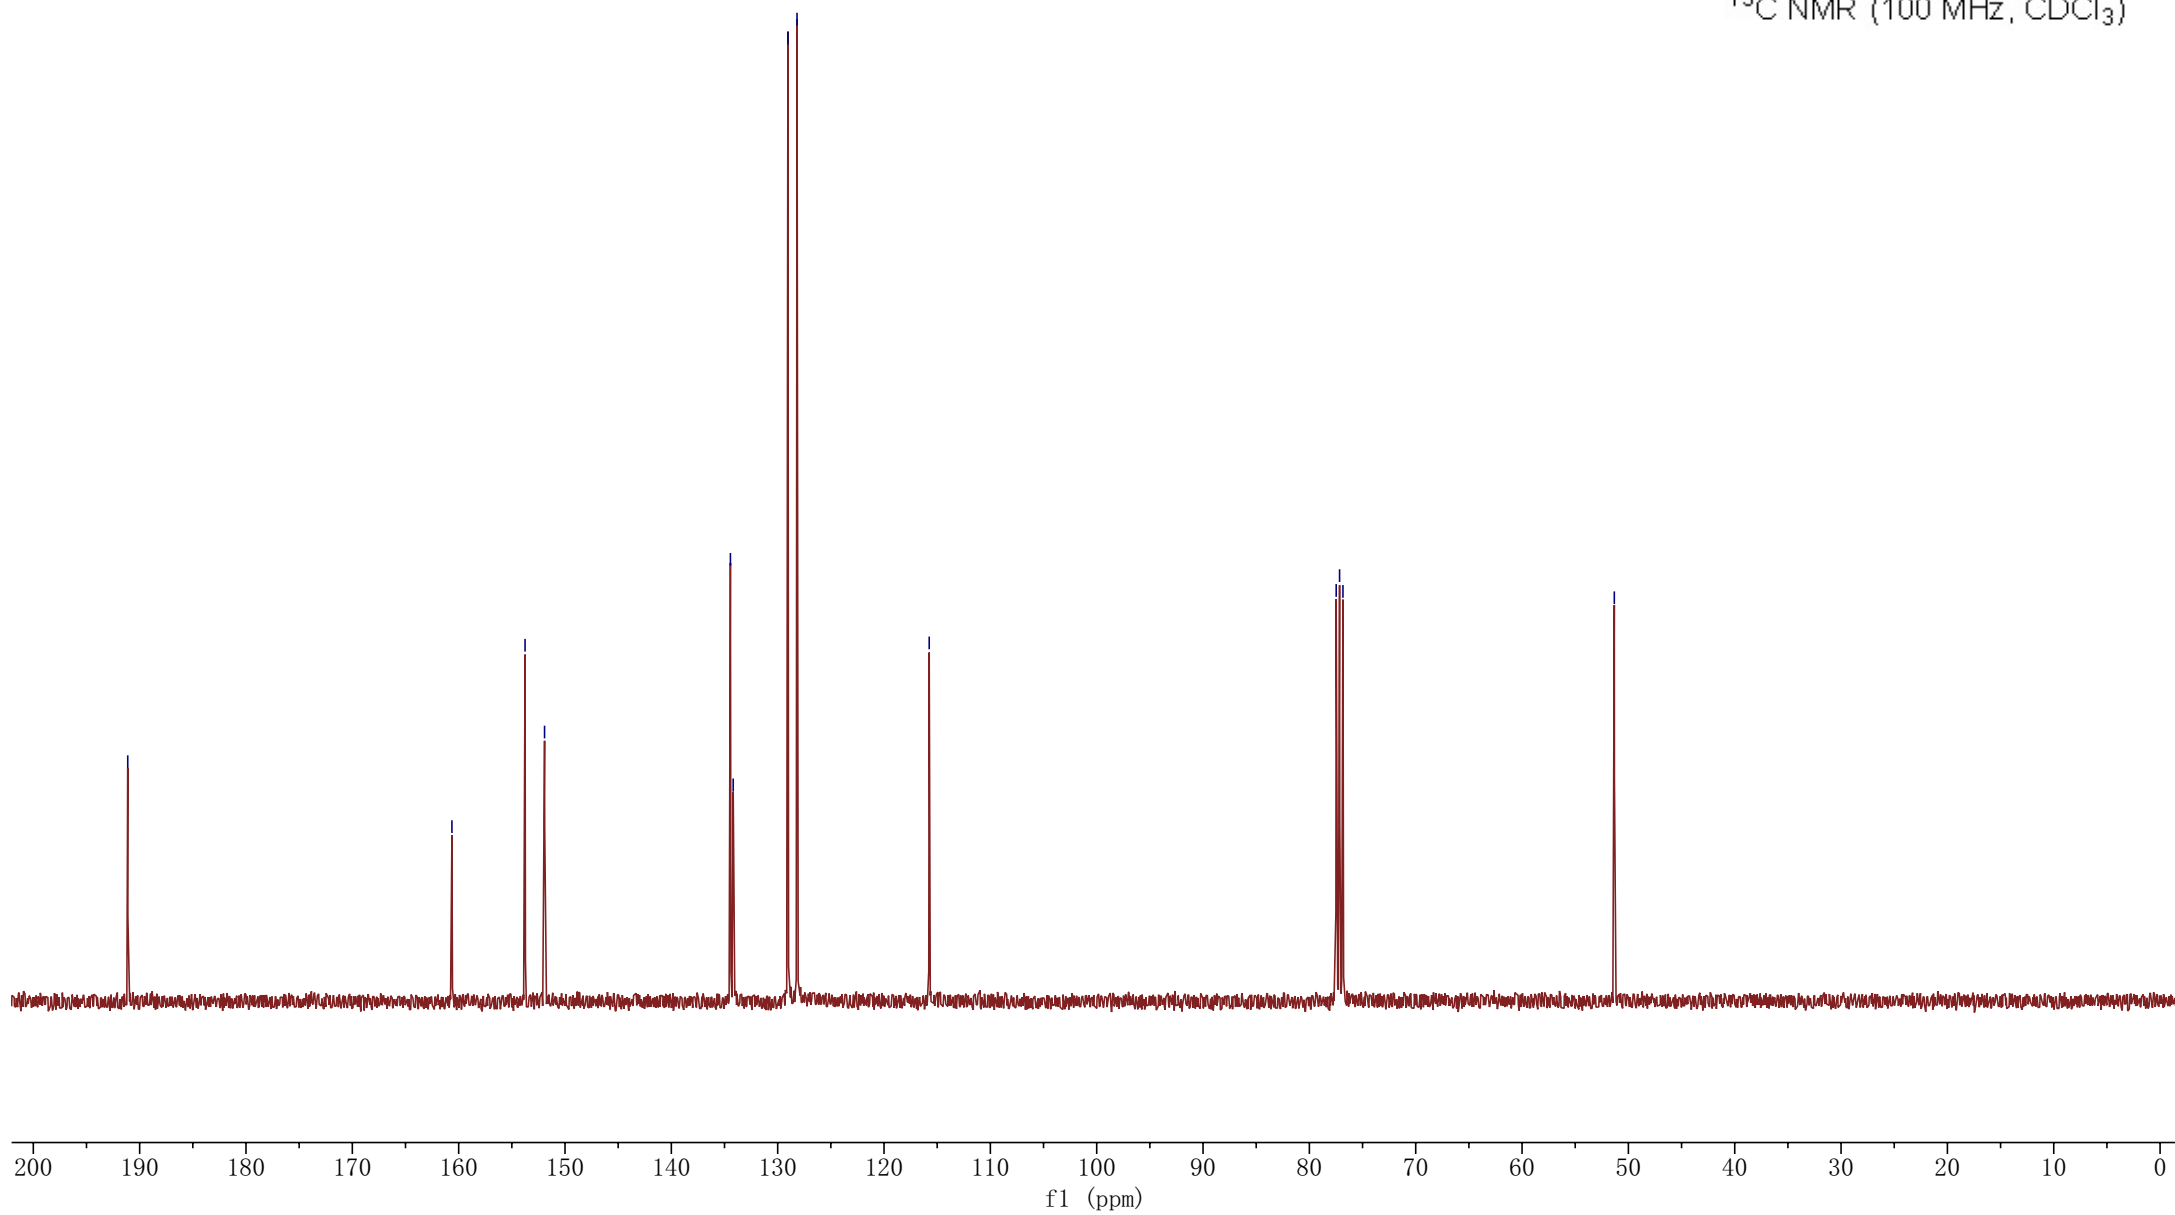

8.431  
8.429  
8.427  
8.425  
8.409  
8.407  
8.405  
8.404  
8.073  
8.070  
8.066  
8.052  
8.049  
8.045  
8.044  
8.073  
8.070  
8.066  
8.052  
8.049  
8.045  
8.044  
7.679  
7.676  
7.662  
7.659  
7.656  
7.654  
7.651  
7.641  
7.638  
7.635  
7.631  
7.620  
7.617  
7.614  
7.558  
7.555  
7.539  
7.536  
7.523  
7.520  
7.512  
7.502  
7.492  
7.260  
7.030  
7.012  
6.581  
6.563  
5.447

8.073  
8.070  
8.066  
8.052  
8.049  
7.659  
7.656  
7.641  
7.638  
7.635  
7.558  
7.555  
7.539  
7.536  
7.523  
7.520  
7.512  
7.502  
7.492  
7.260  
7.030  
7.012  
6.581  
6.563

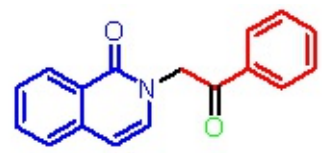

3wa

<sup>1</sup>H NMR (400 MHz, CDCl<sub>3</sub>)

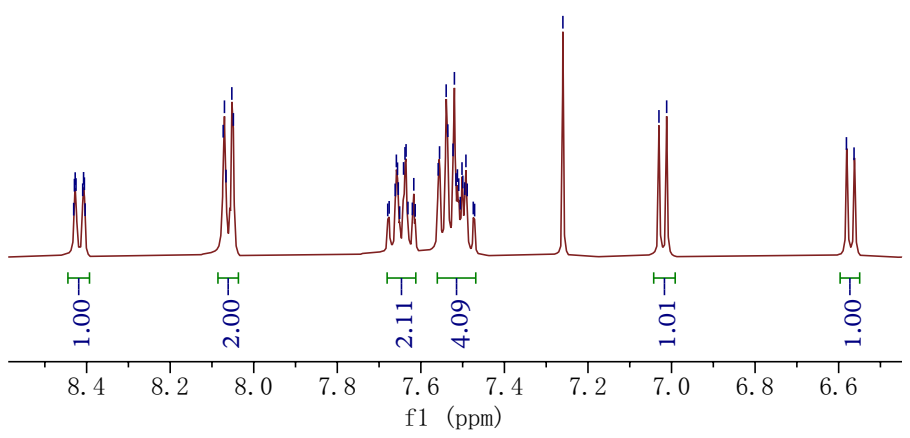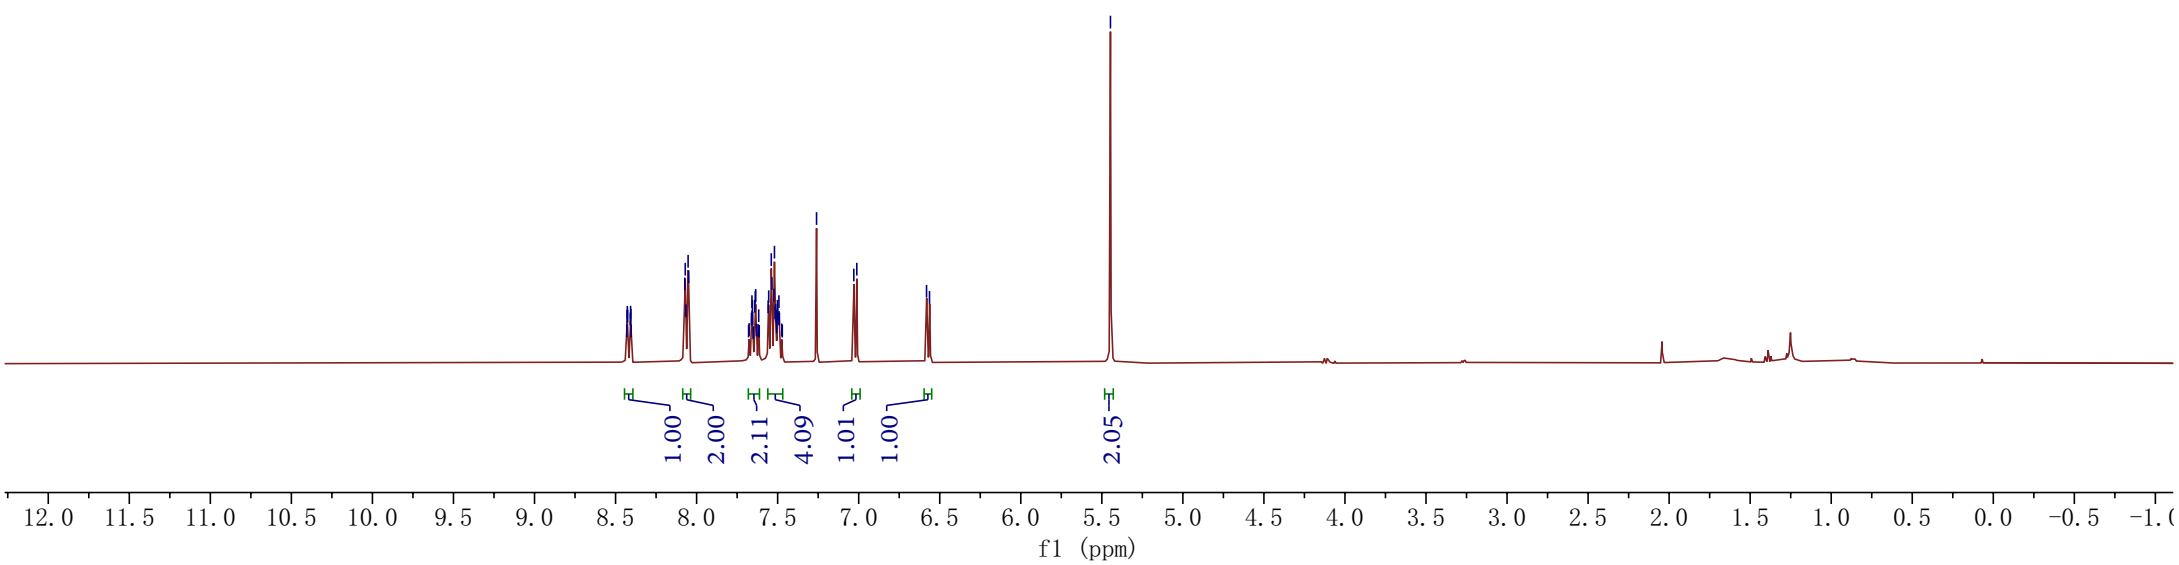

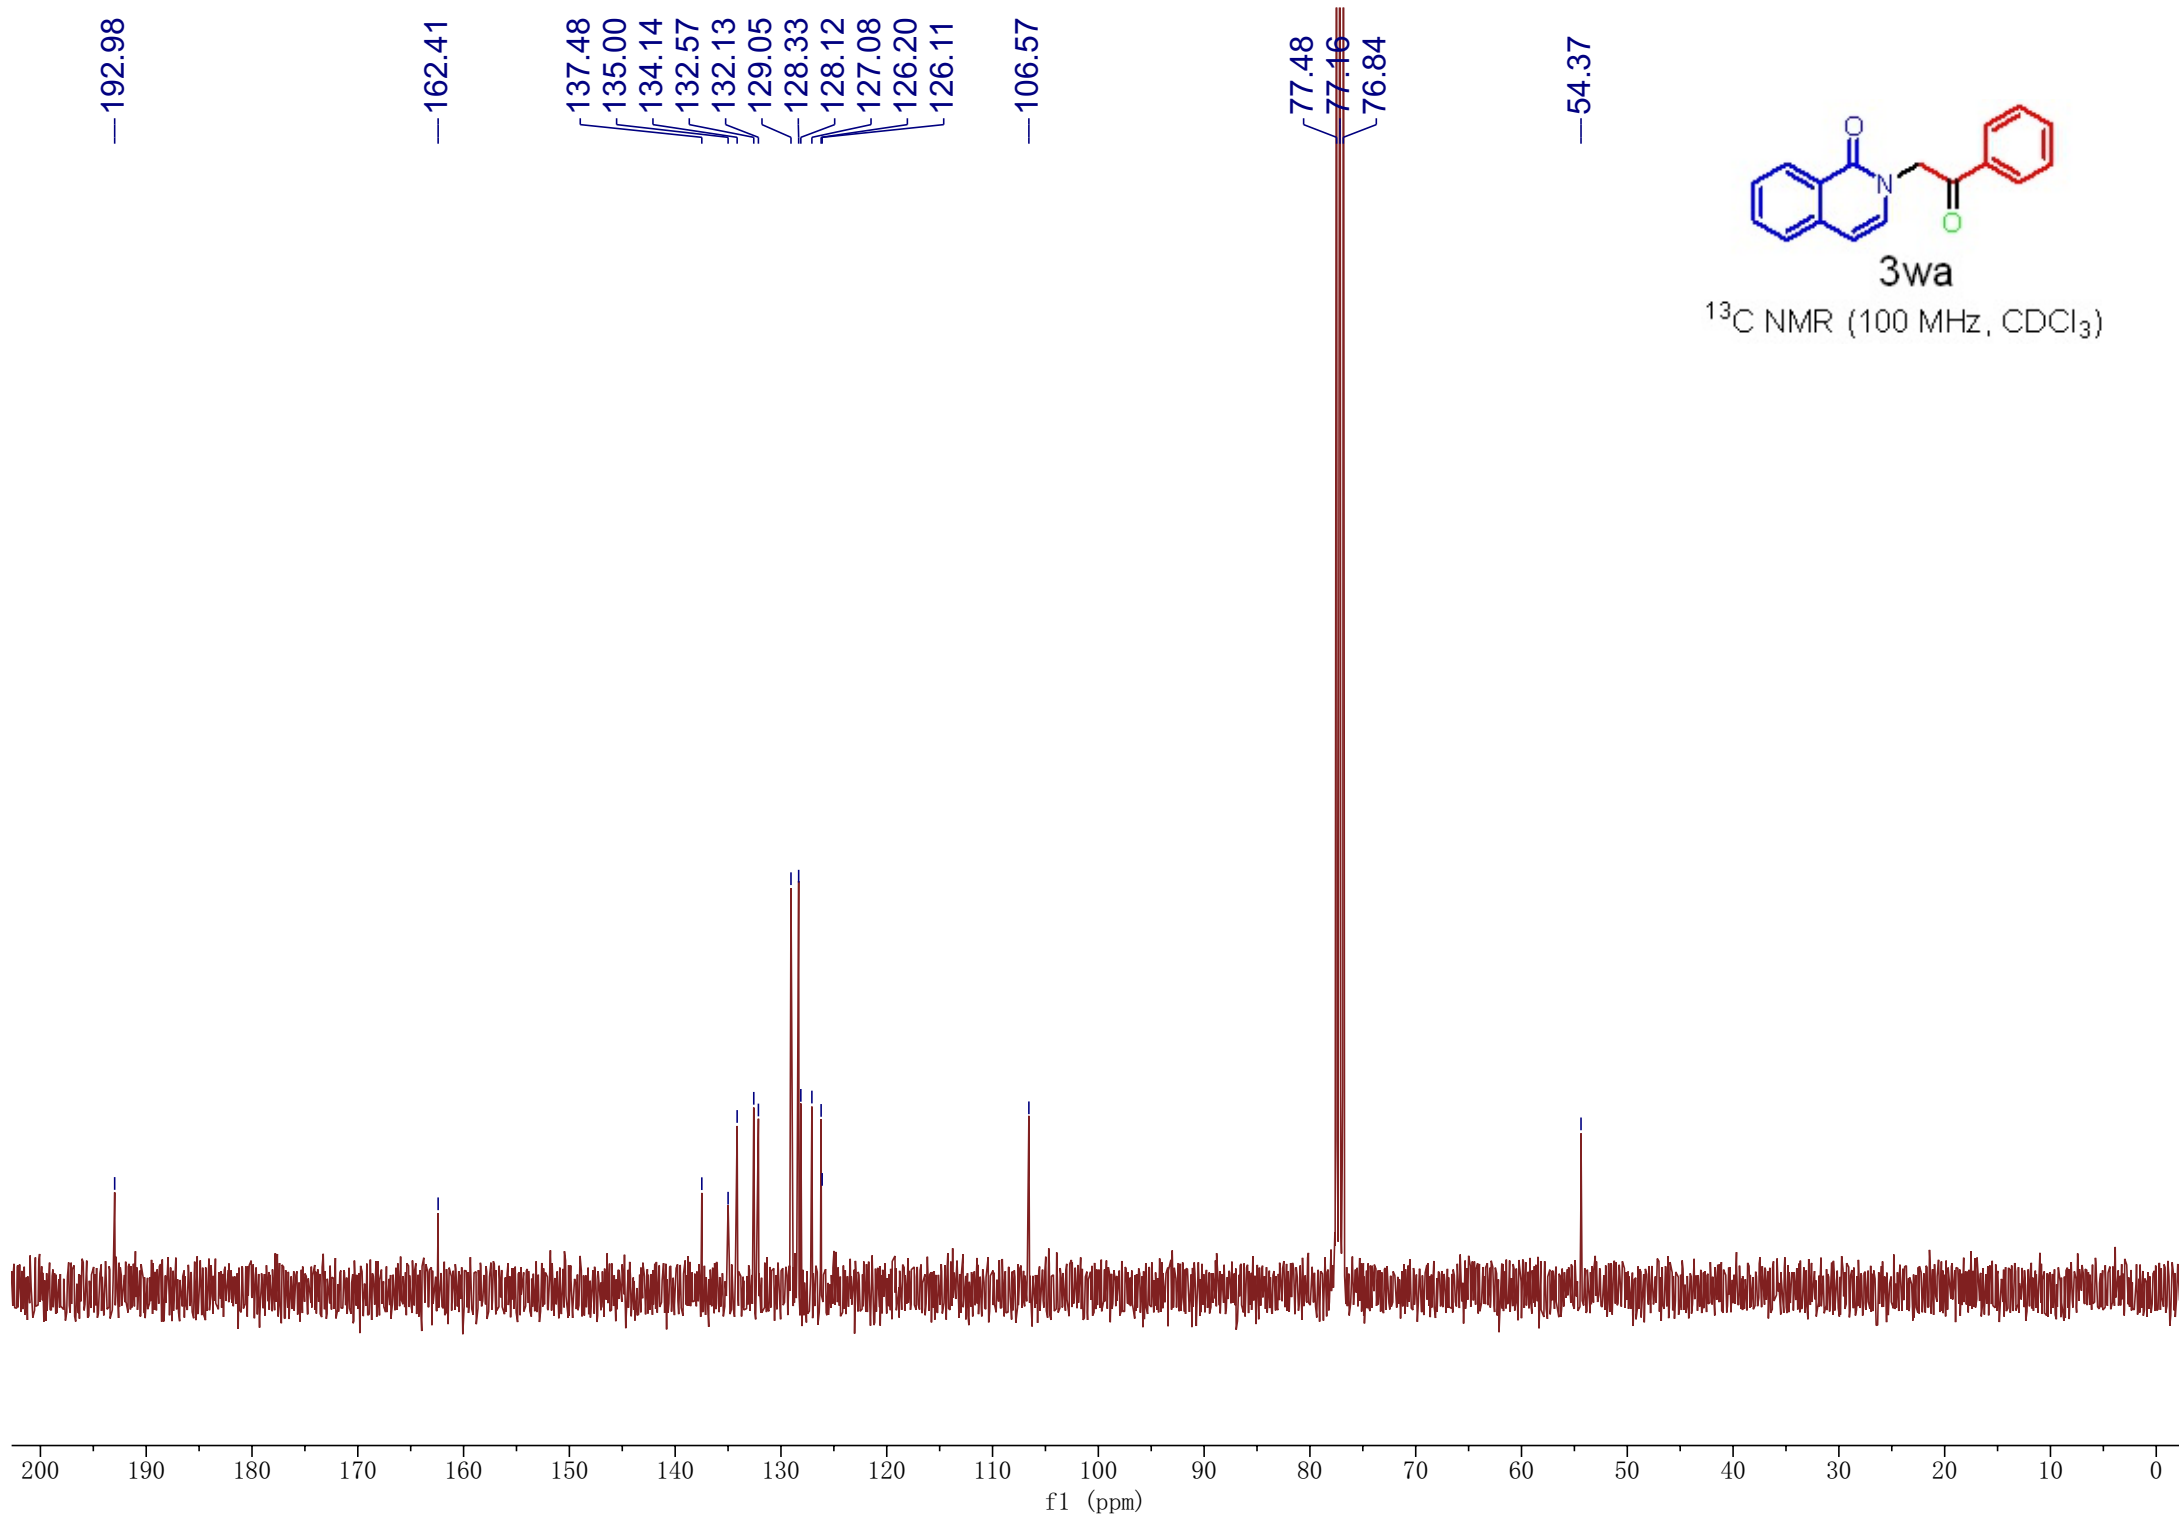



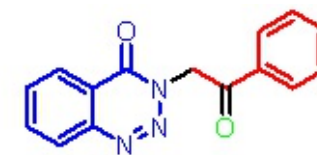

3xa

<sup>1</sup>H NMR (400 MHz, CDCl<sub>3</sub>)

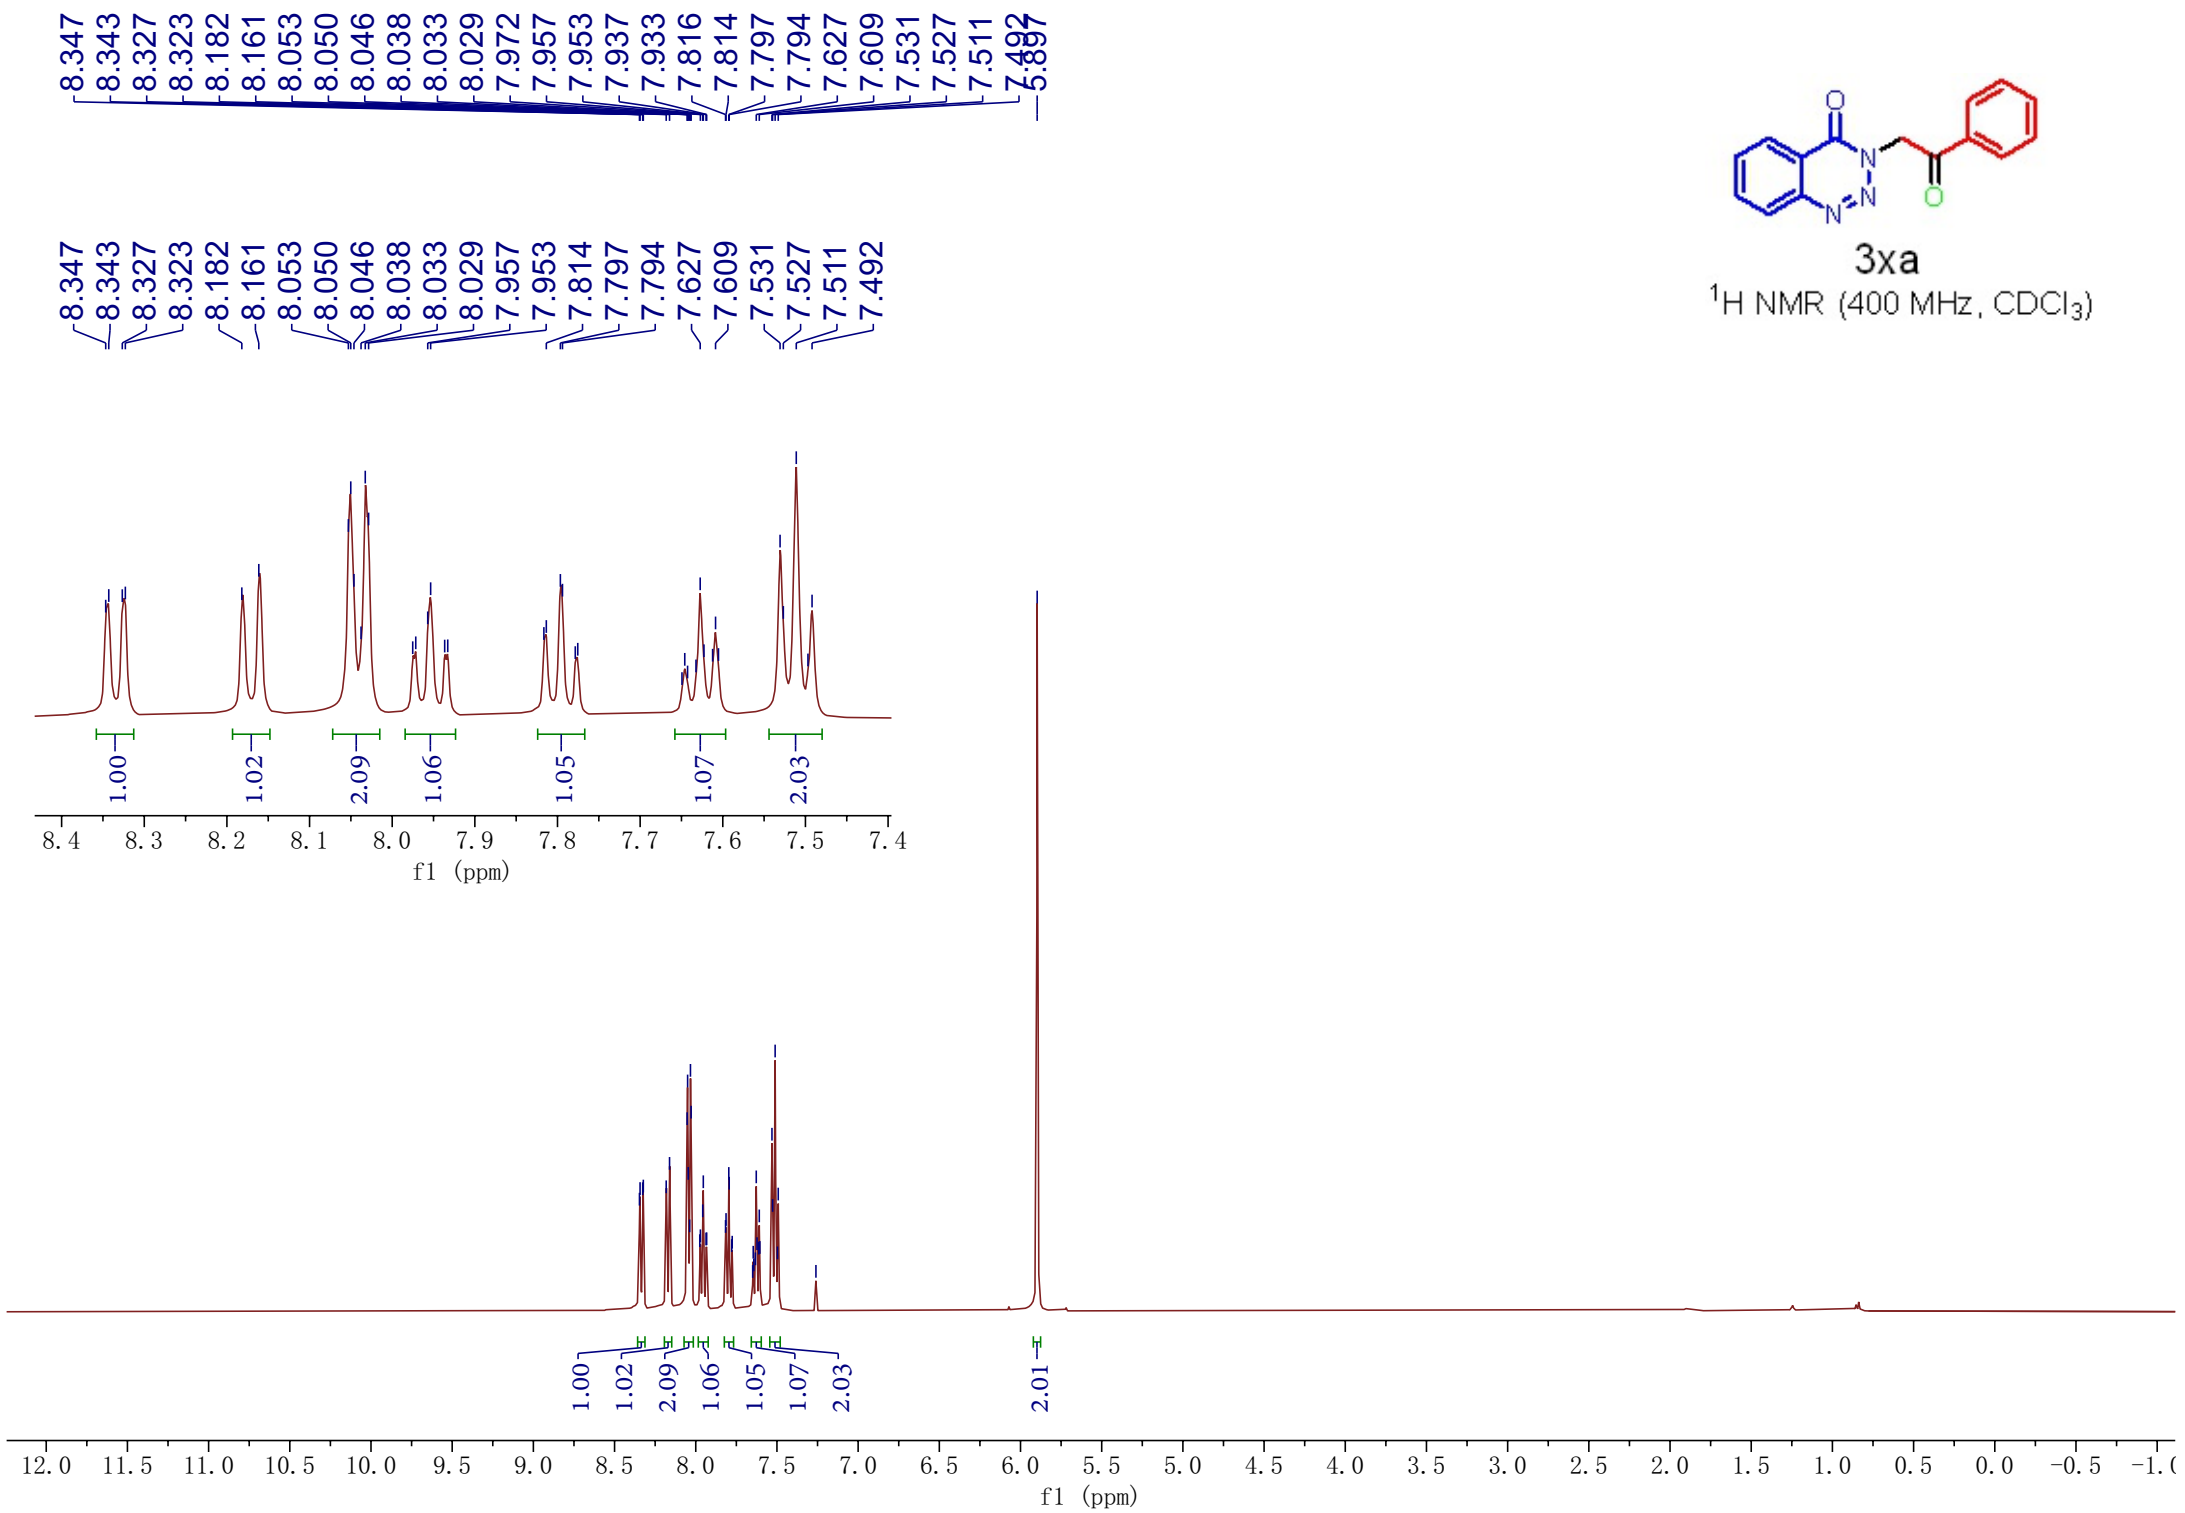

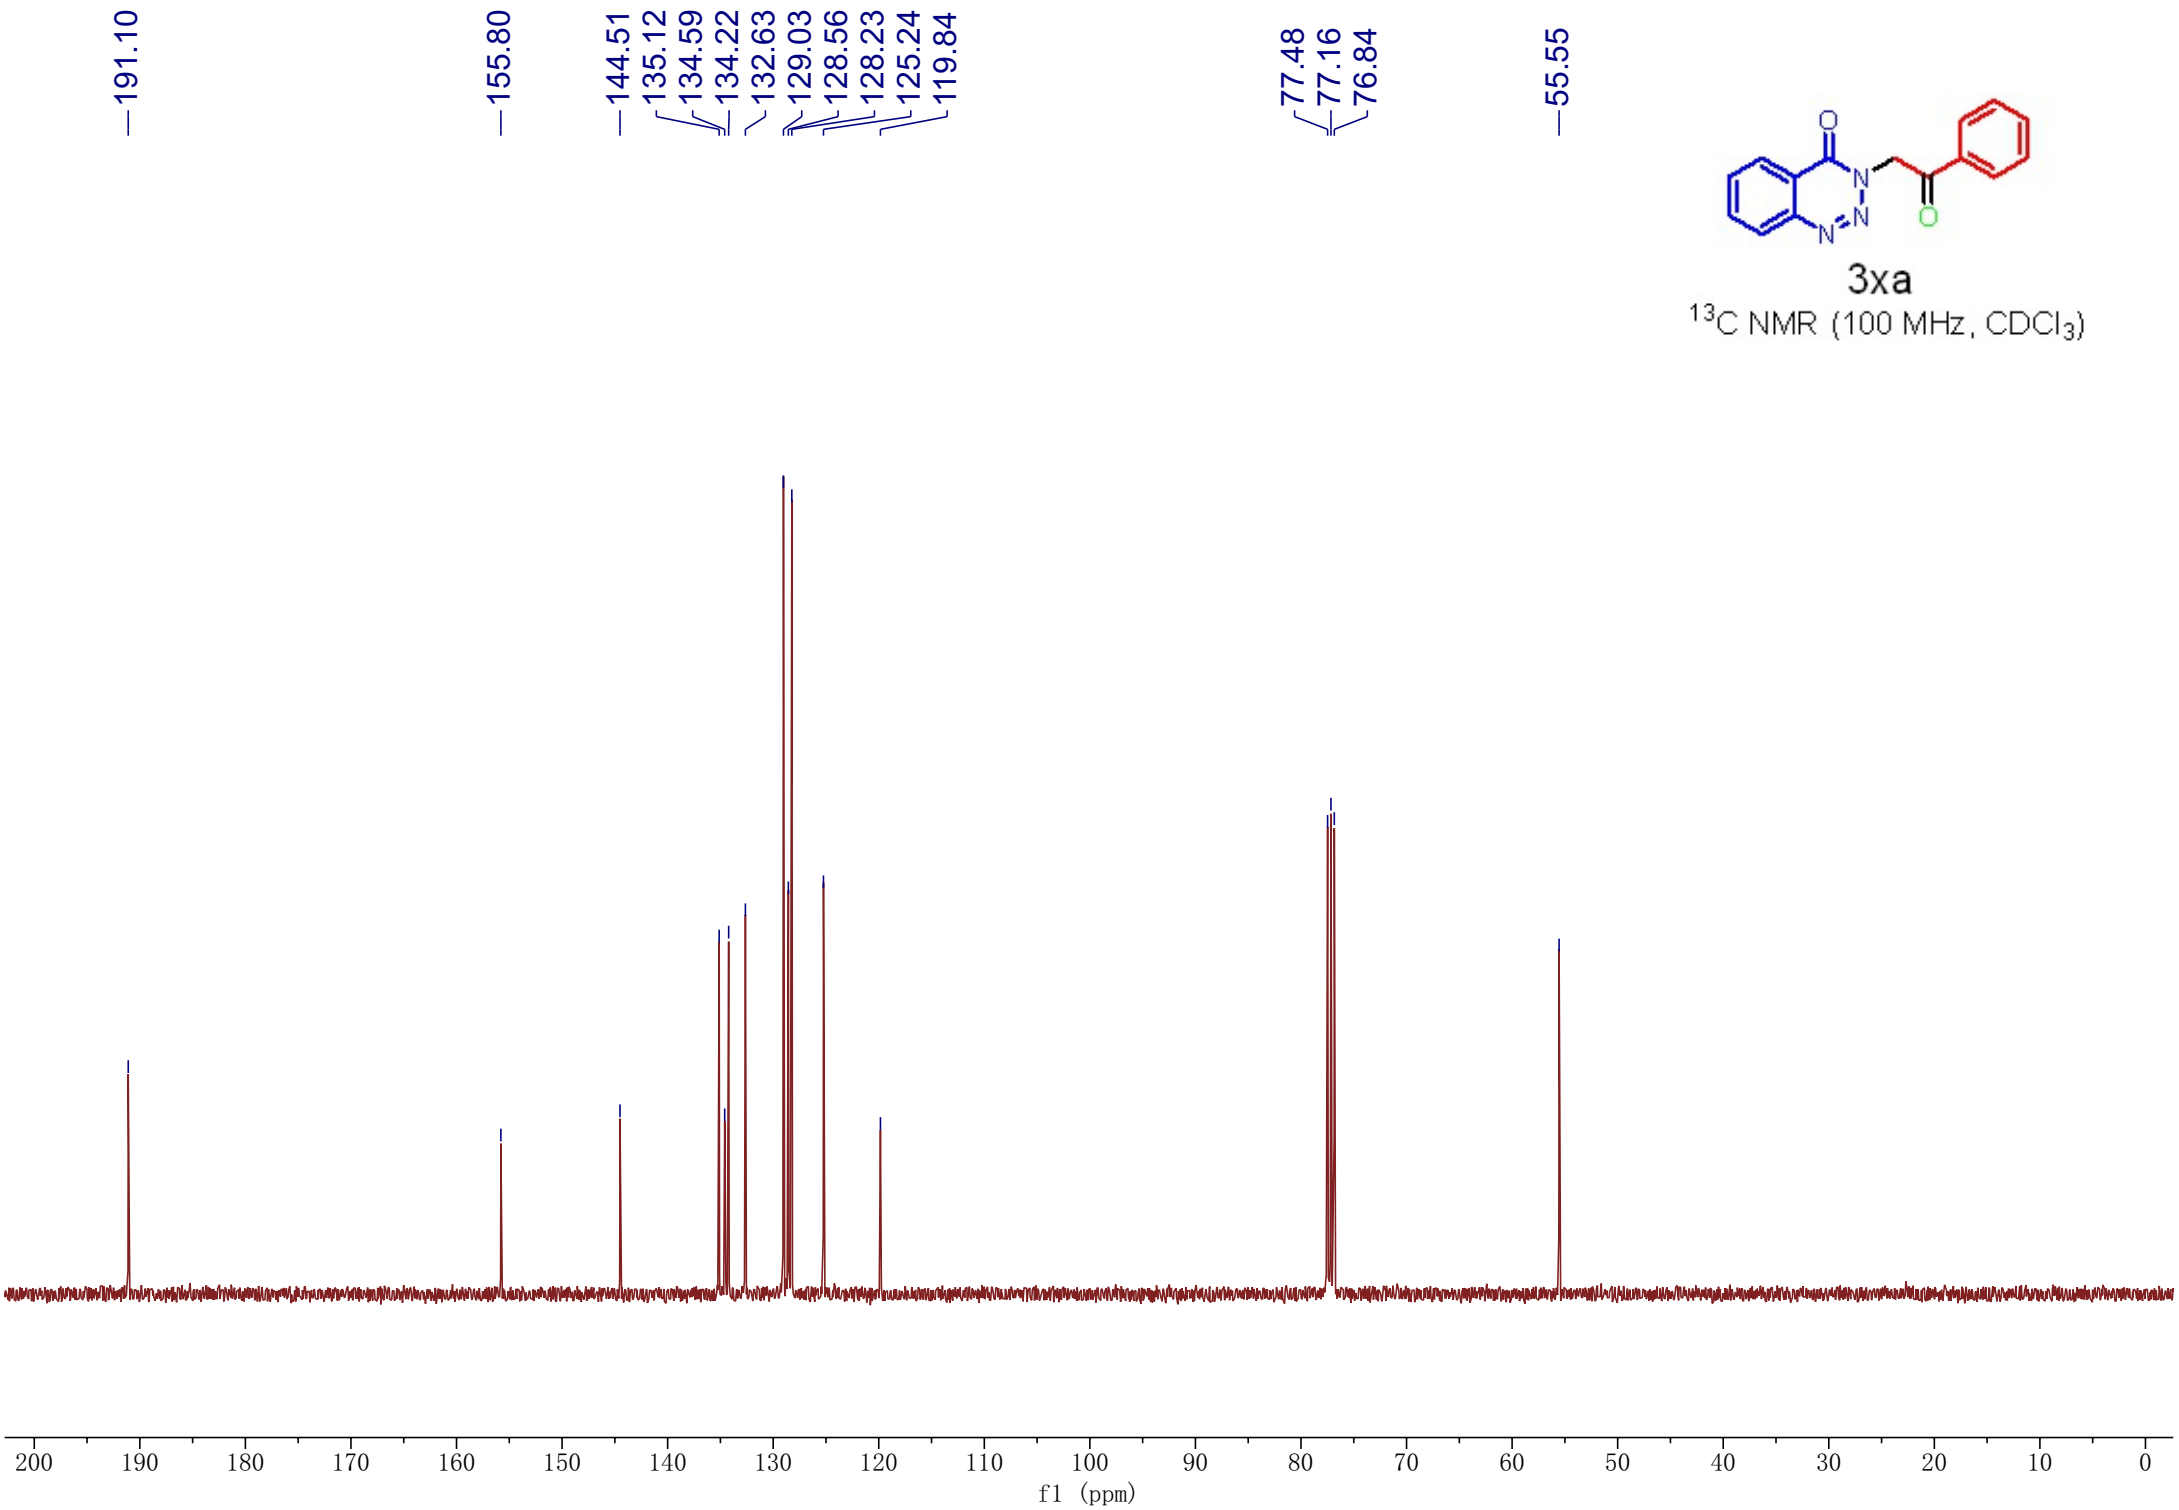

8.373  
8.085  
8.082  
8.079  
8.070  
8.065  
8.061  
7.933  
7.929  
7.913  
7.909  
7.704  
7.701  
7.697  
7.687  
7.682  
7.678  
7.667  
7.663  
7.660  
7.575  
7.571  
7.556  
7.541  
7.536  
7.507  
7.503  
7.489  
7.485  
7.482  
7.468  
7.464  
7.366  
7.363  
7.345  
7.328  
7.325  
7.260  
6.991  
6.988  
6.970  
6.967  
5.736

8.373  
8.085  
8.082  
8.079  
8.065  
8.061  
7.933  
7.929  
7.913  
7.909  
7.682  
7.663  
7.575  
7.571  
7.556  
7.536  
7.485  
7.363  
7.345  
7.260  
6.991  
6.988  
6.970  
6.967

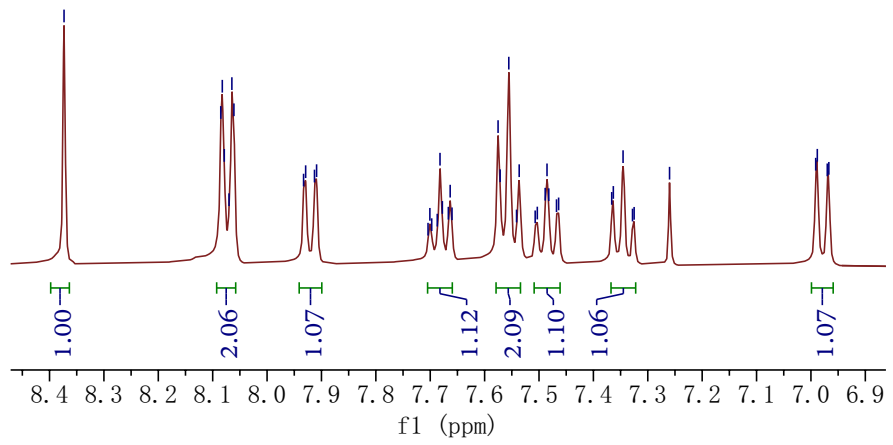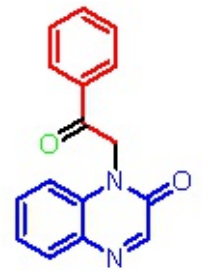

3ya

<sup>1</sup>H NMR (400 MHz, CDCl<sub>3</sub>)

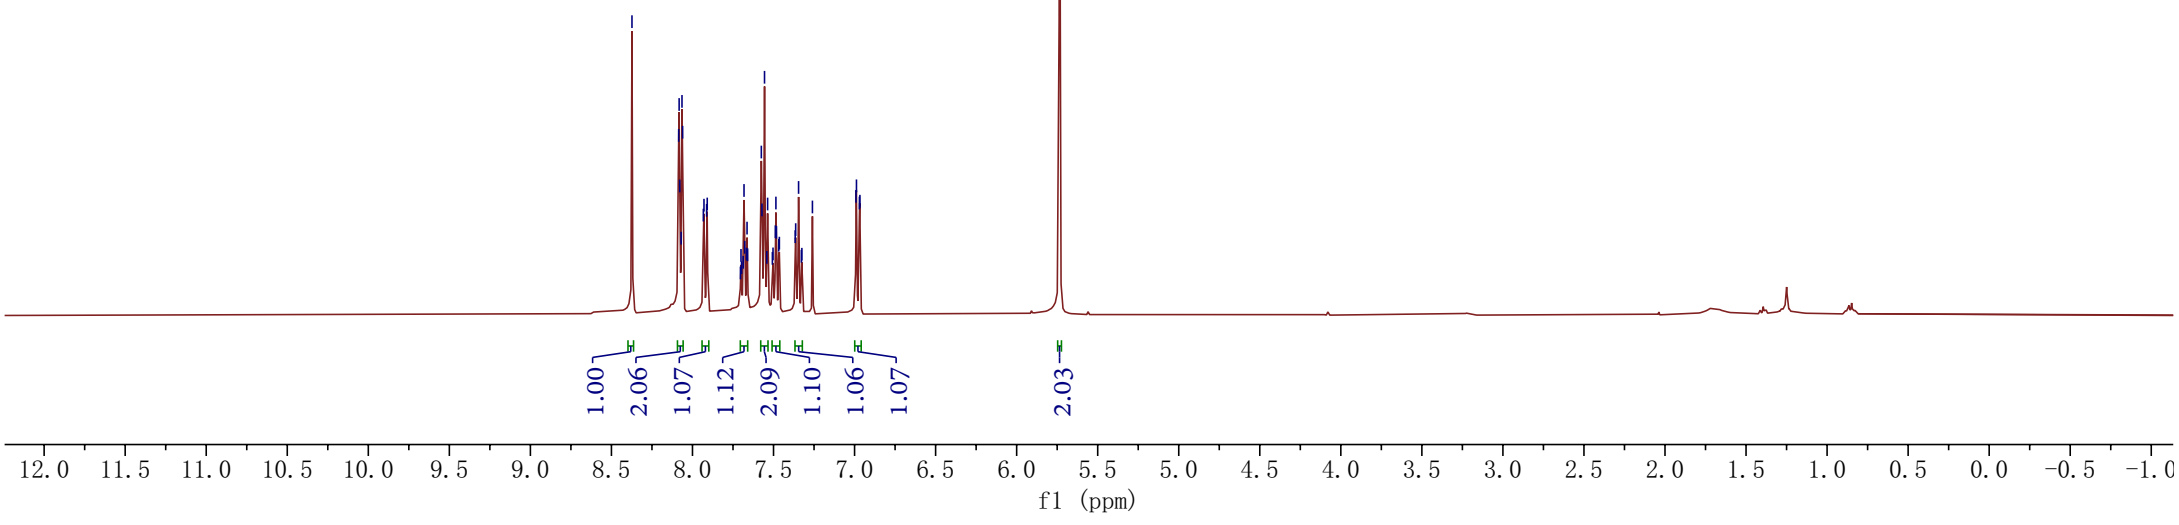

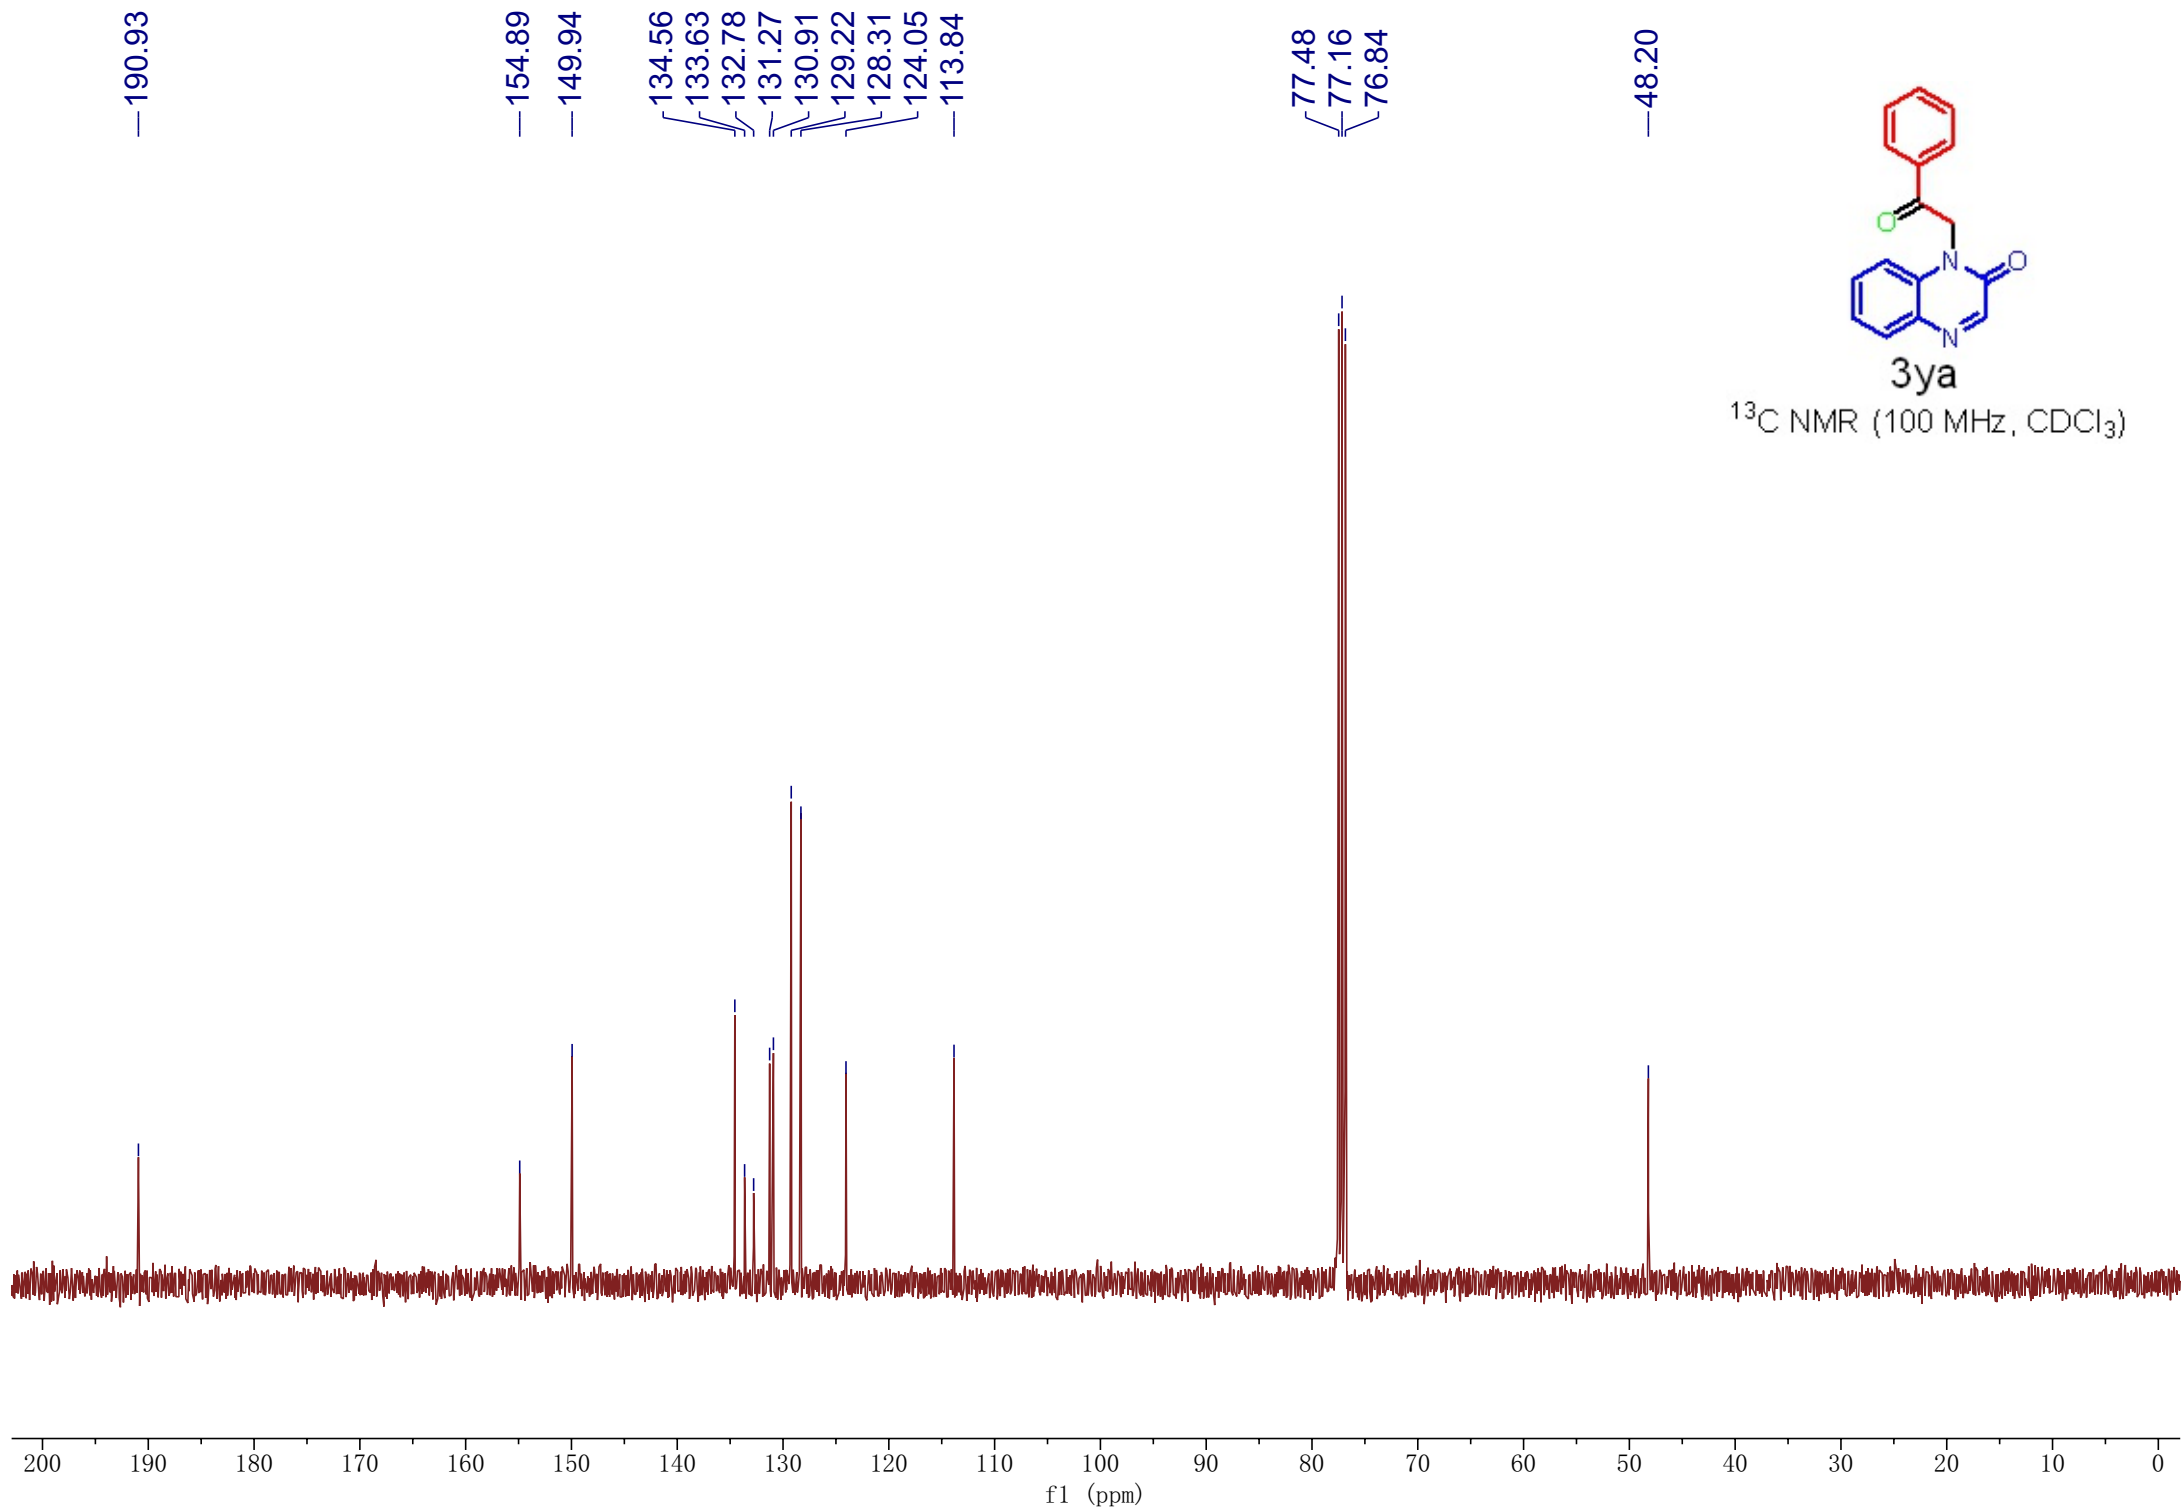

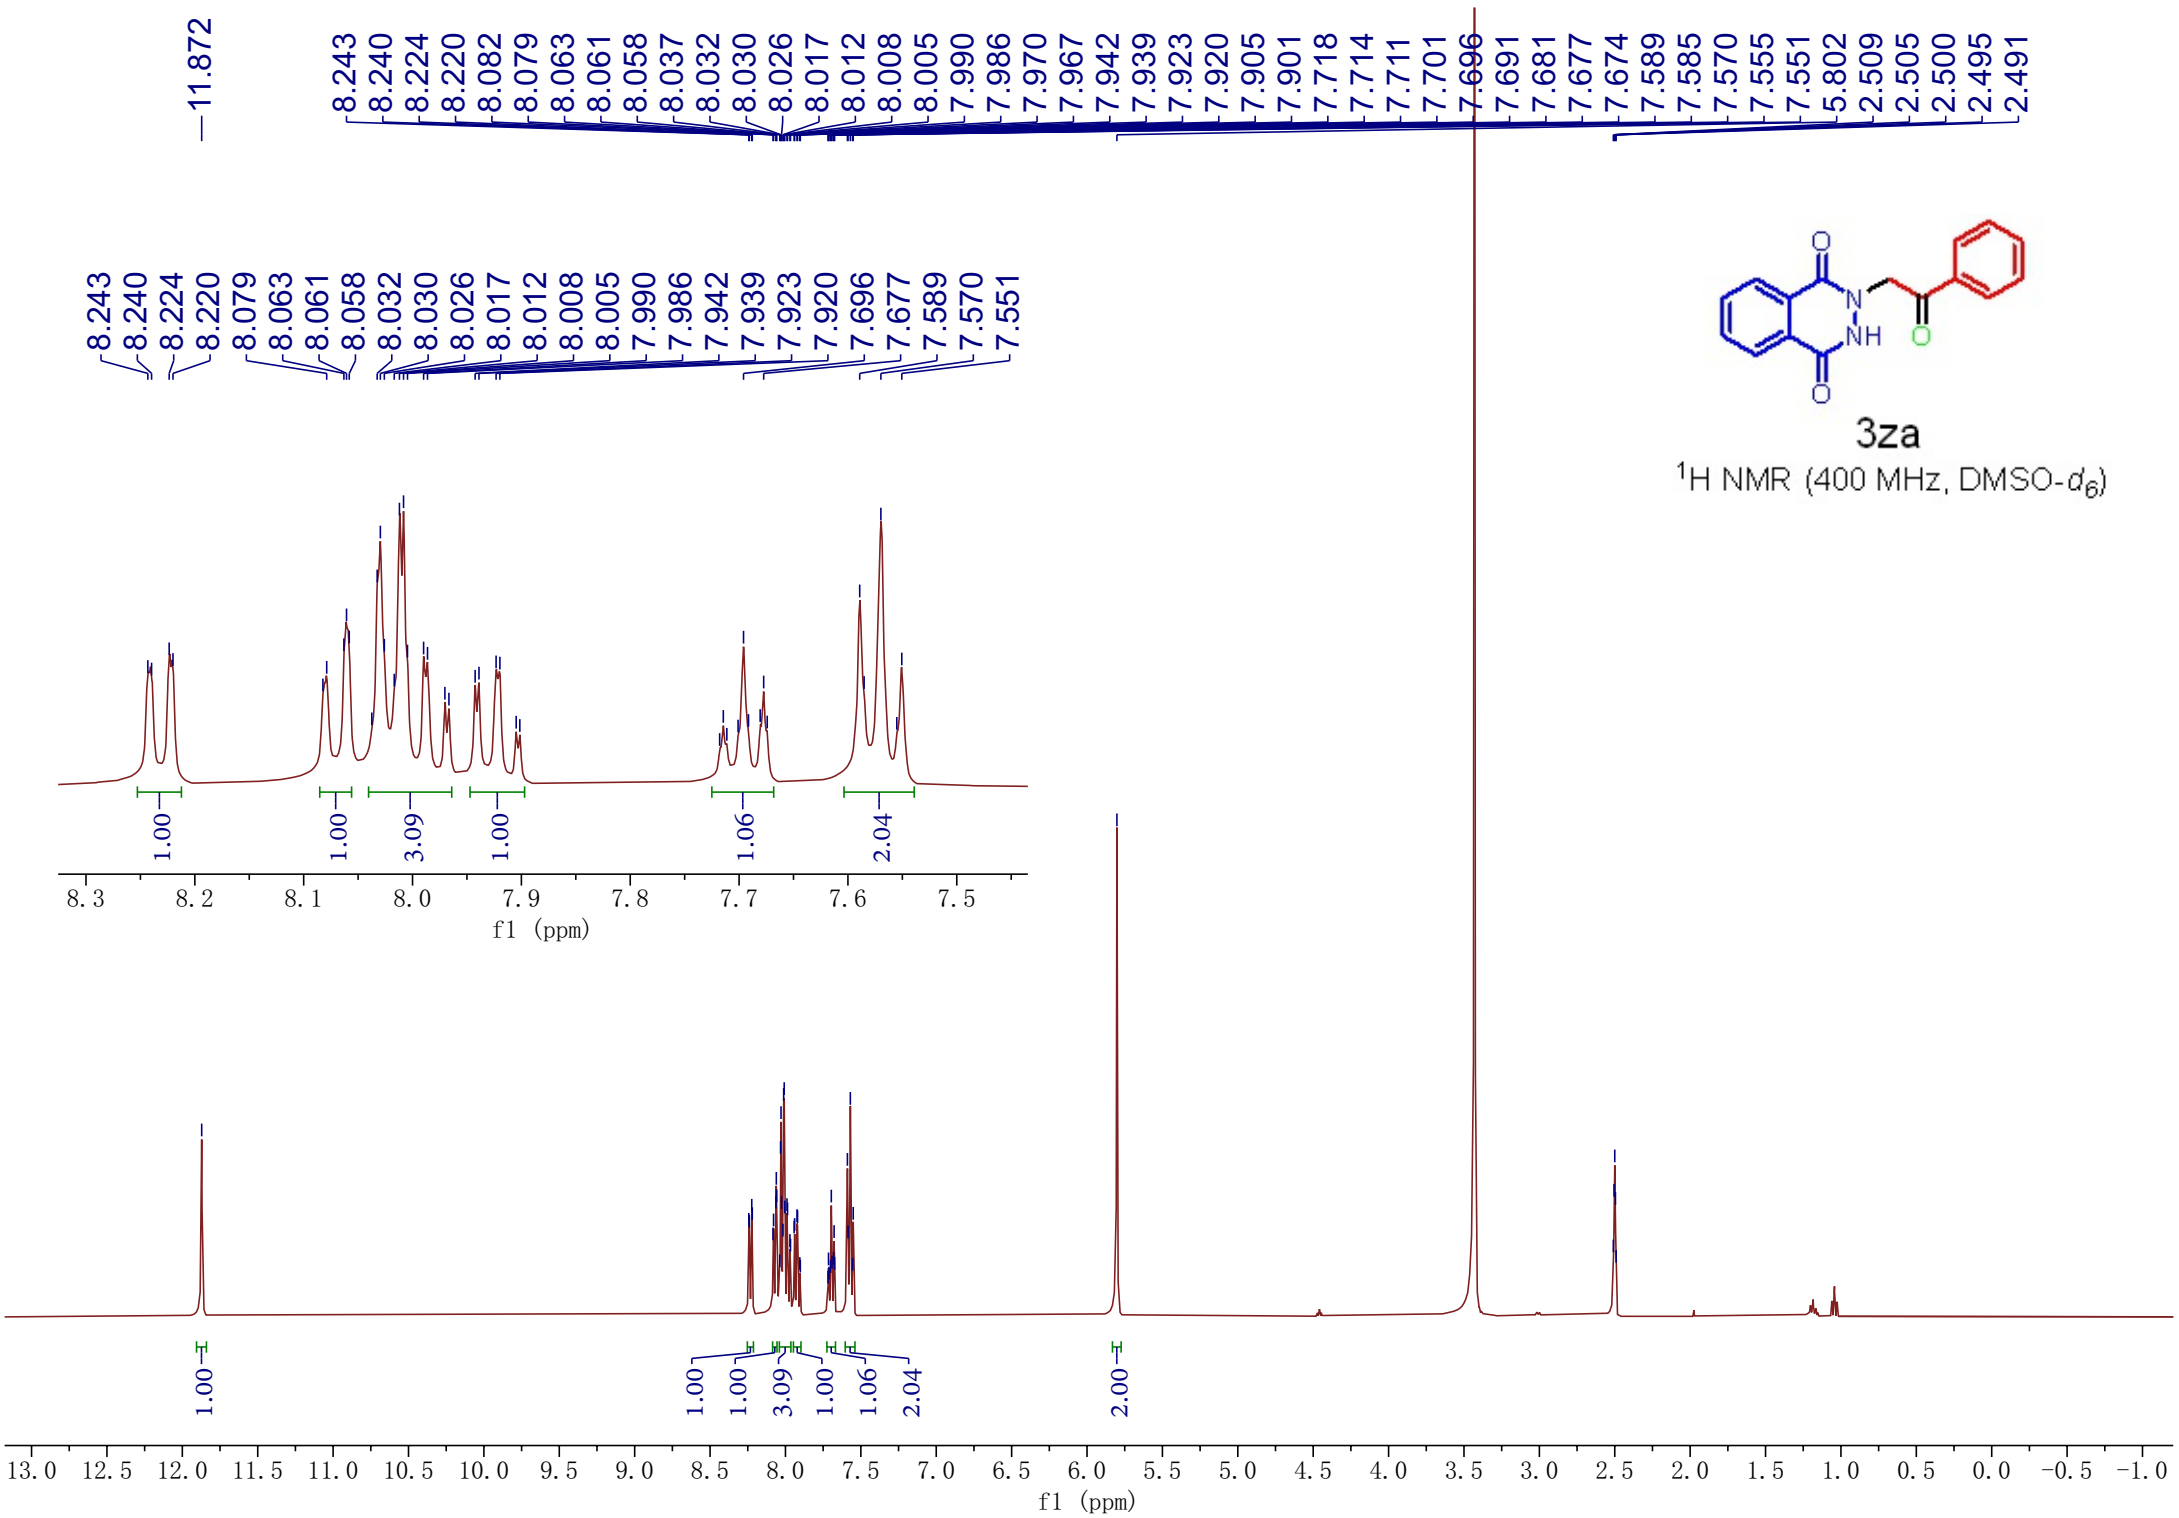

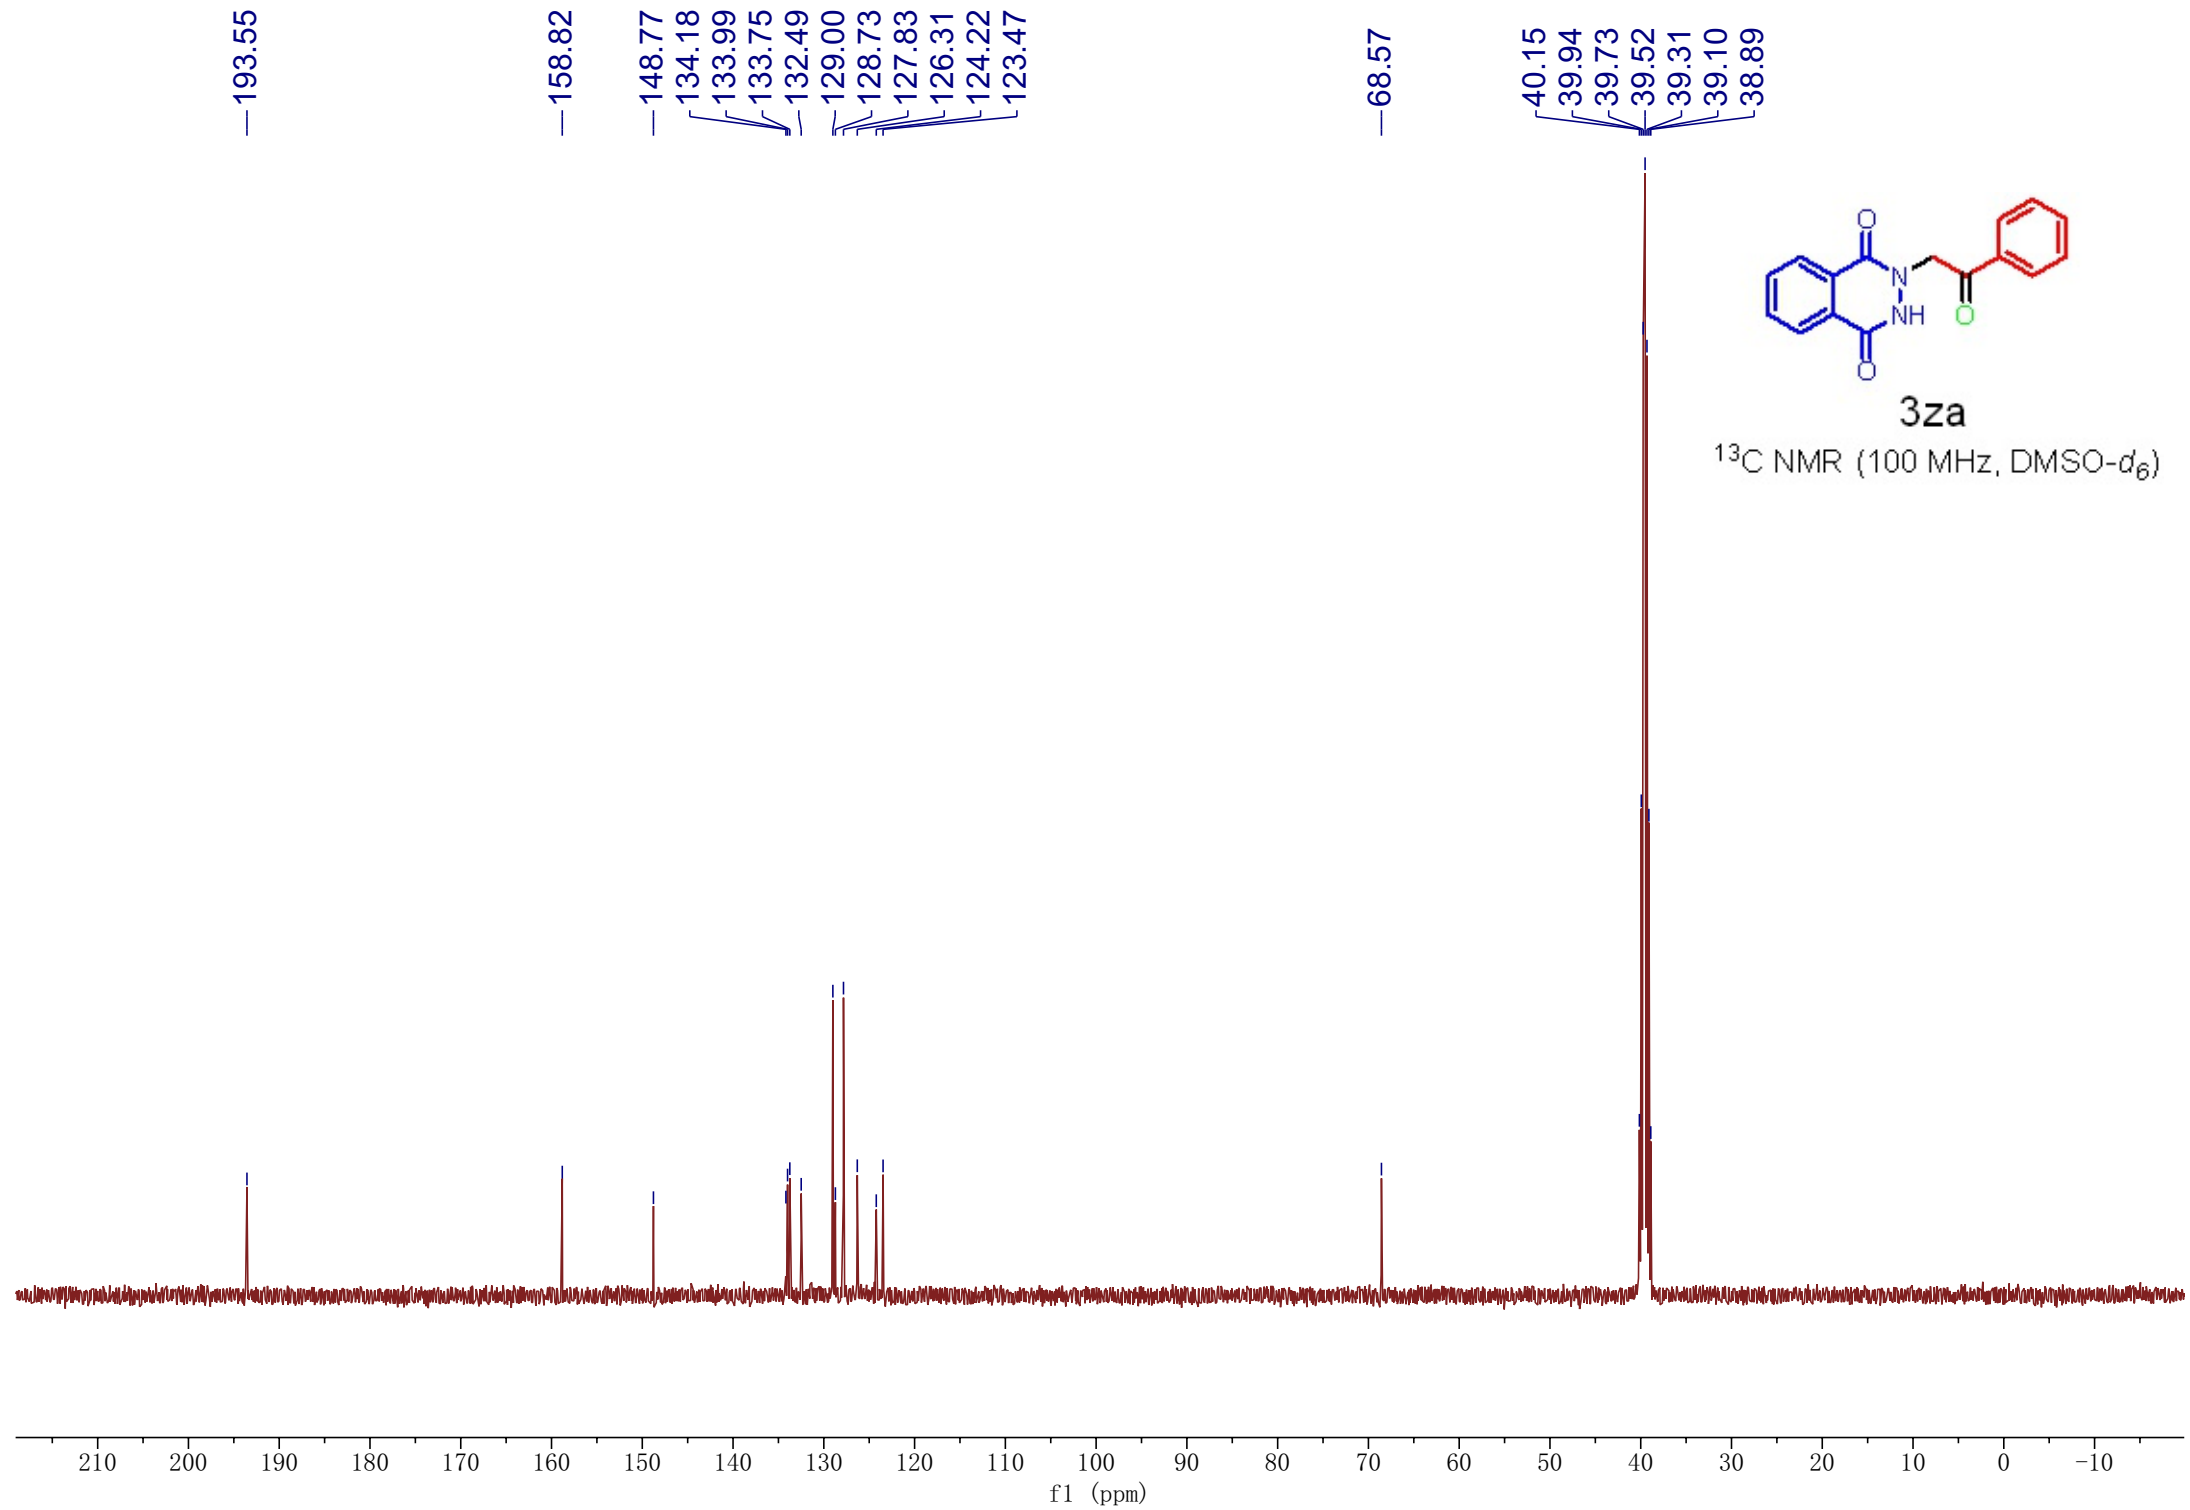

8.030  
8.027  
8.023  
8.014  
8.009  
8.005  
7.698  
7.695  
7.692  
7.681  
7.677  
7.672  
7.661  
7.658  
7.655  
7.566  
7.562  
7.546  
7.532  
7.527  
7.260  
7.171  
7.159  
7.150  
7.112  
7.107  
7.091  
7.086  
6.833  
6.828  
5.229

8.030  
8.027  
8.023  
8.014  
8.009  
8.005  
7.695  
7.677  
7.672  
7.661  
7.658  
7.566  
7.562  
7.546  
7.532  
7.527  
7.260  
7.171  
7.150  
7.112  
7.107  
7.091  
7.086  
6.833  
6.828

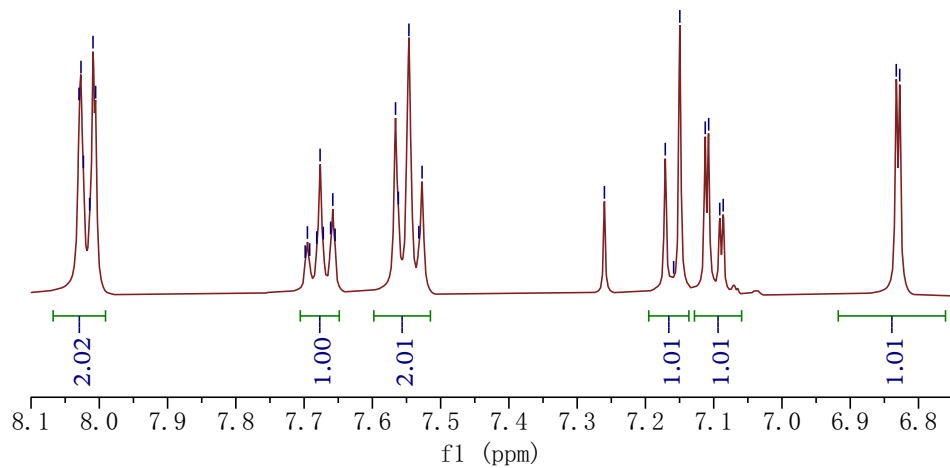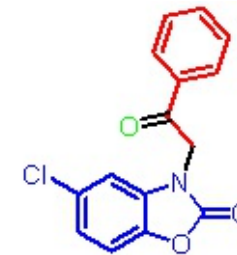

3a'a

<sup>1</sup>H NMR (400 MHz, CDCl<sub>3</sub>)

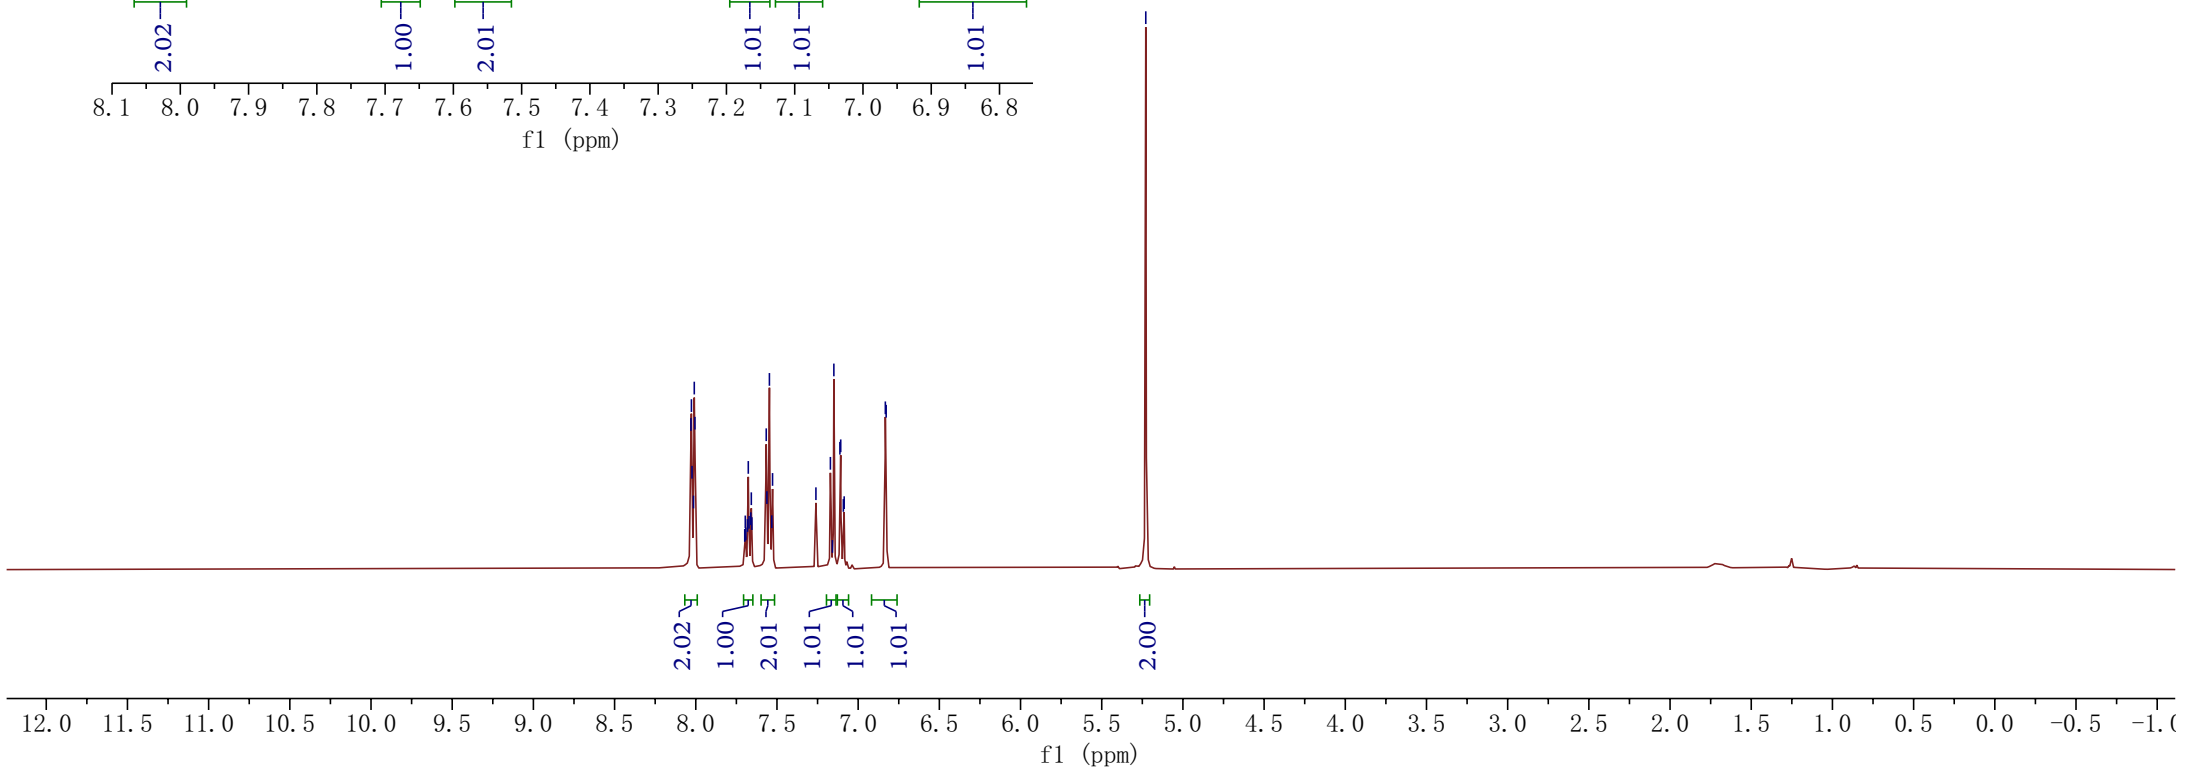

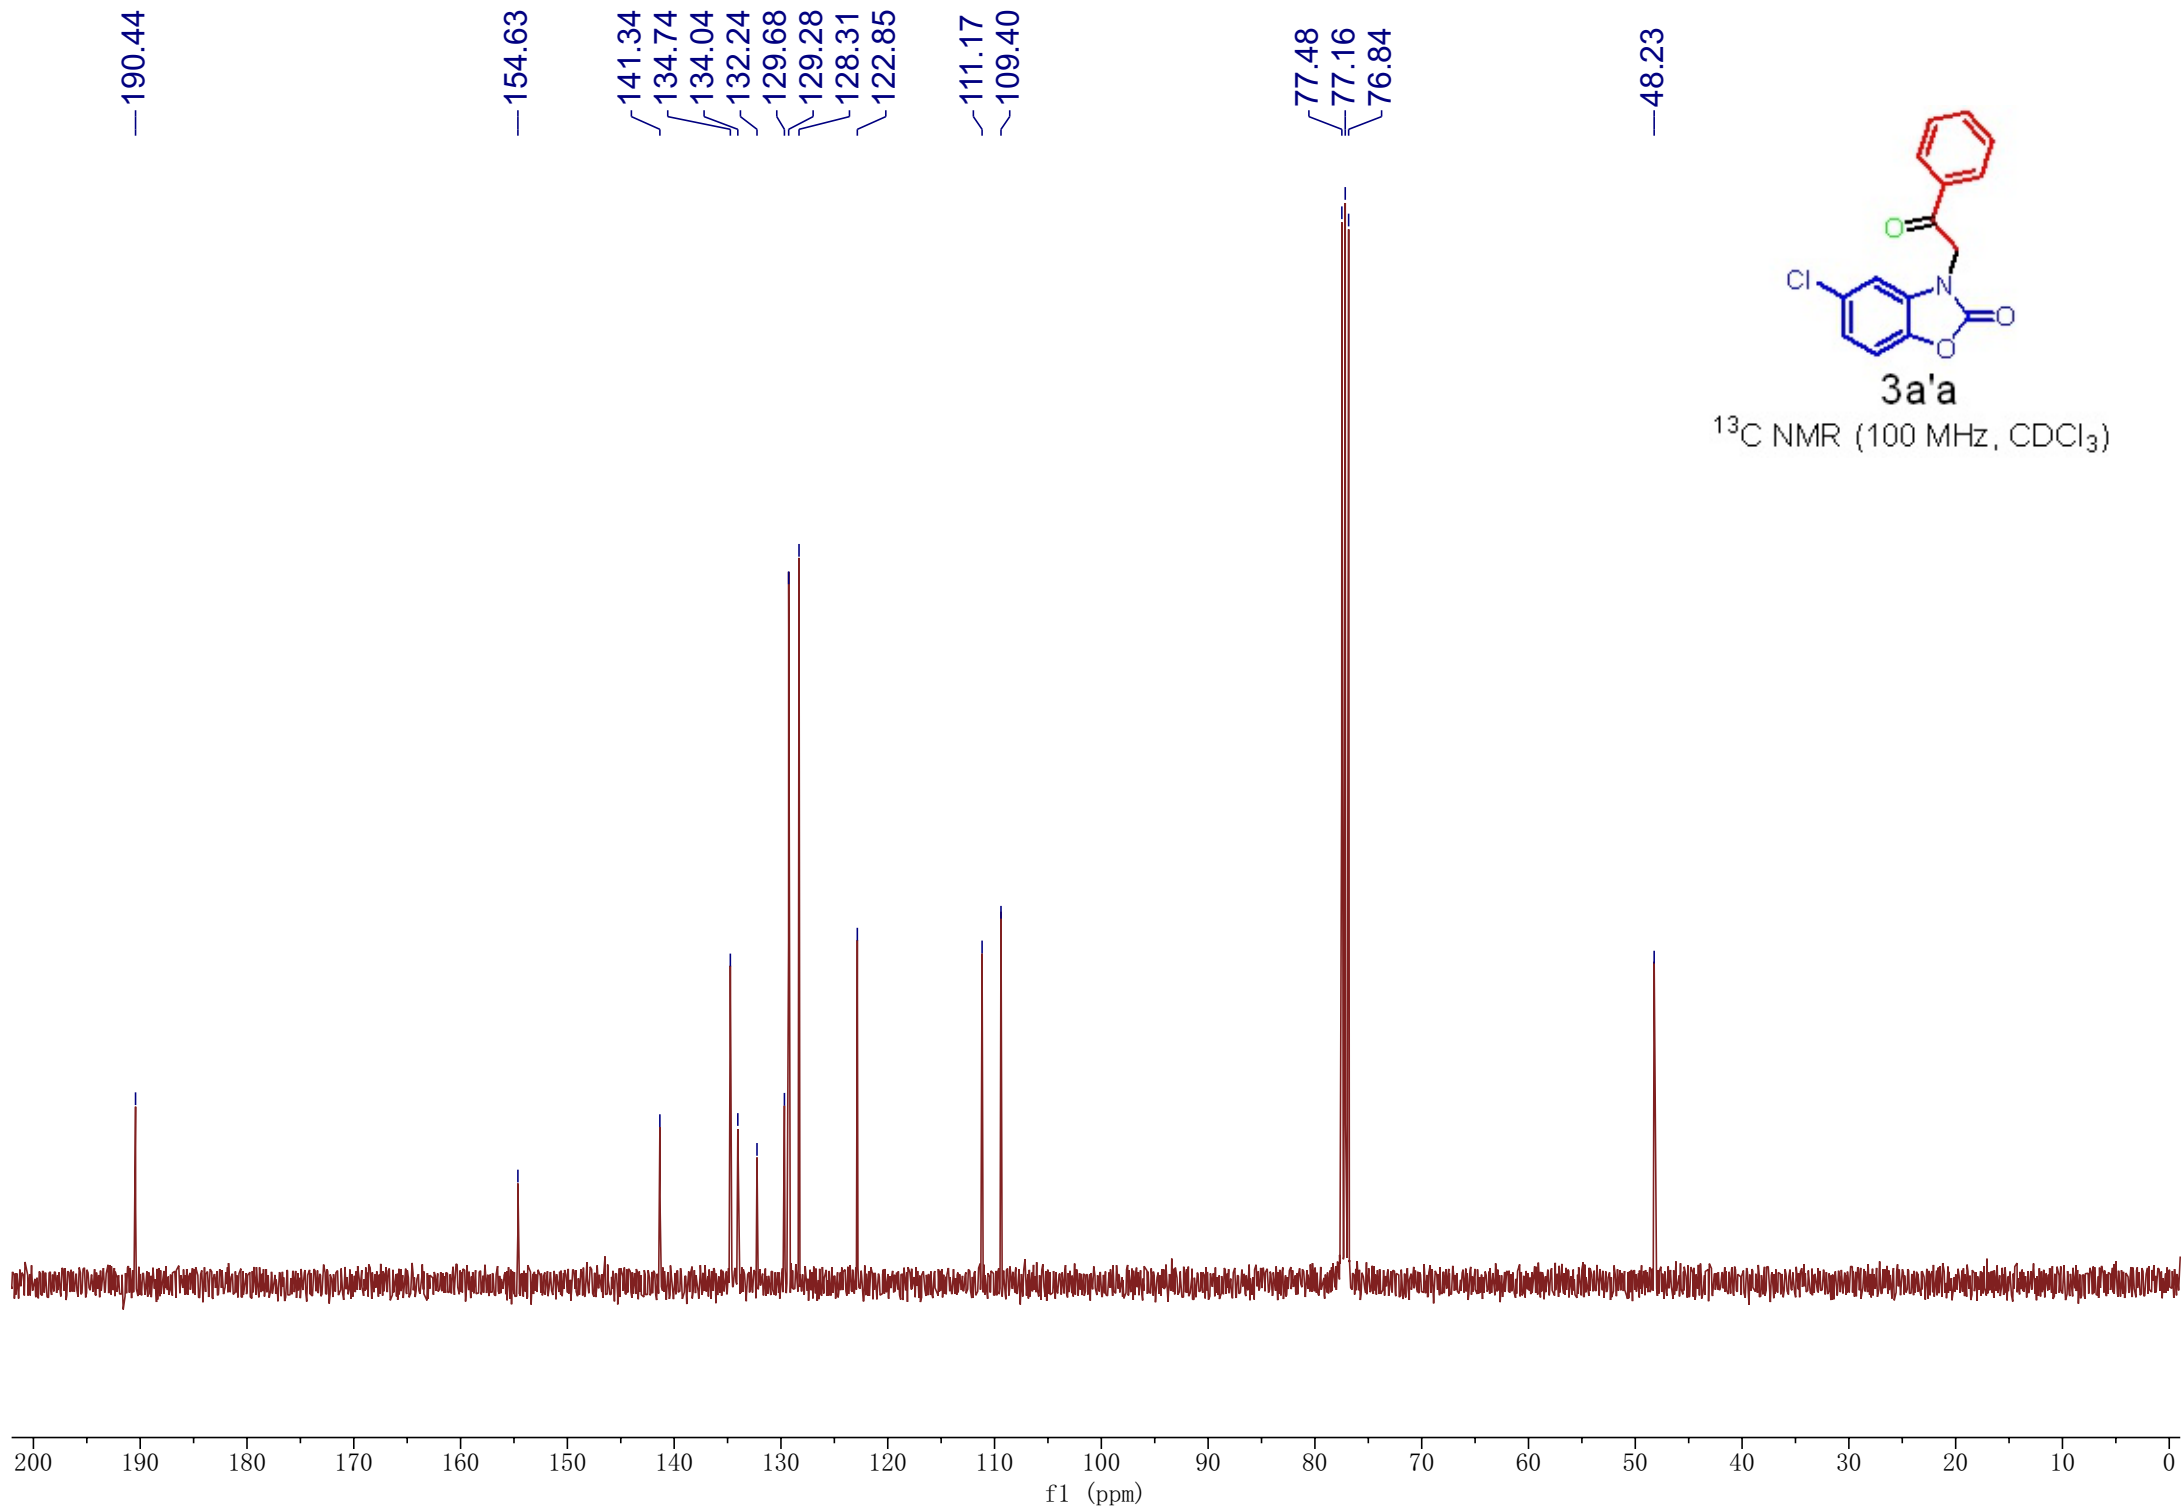



8.187  
8.183  
7.995  
7.992  
7.990  
7.988  
7.980  
7.975  
7.971  
7.666  
7.647  
7.643  
7.632  
7.628  
7.625  
7.537  
7.532  
7.528  
7.515  
7.512  
7.508  
7.498  
7.494  
7.370  
7.359  
7.260  
7.049  
7.046  
7.038  
7.035

8.187  
8.183  
7.995  
7.992  
7.990  
7.988  
7.980  
7.975  
7.971  
7.647  
7.632  
7.628  
7.532  
7.528  
7.515  
7.512  
7.508  
7.494  
7.370  
7.359  
7.260  
7.049  
7.046  
7.038  
7.035

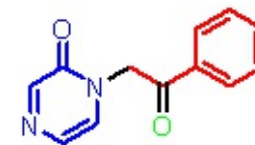

3b'a

<sup>1</sup>H NMR (400 MHz, CDCl<sub>3</sub>)

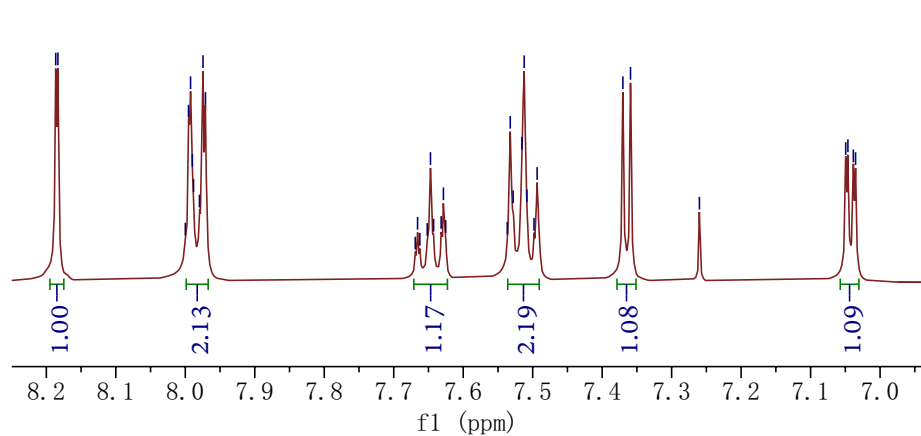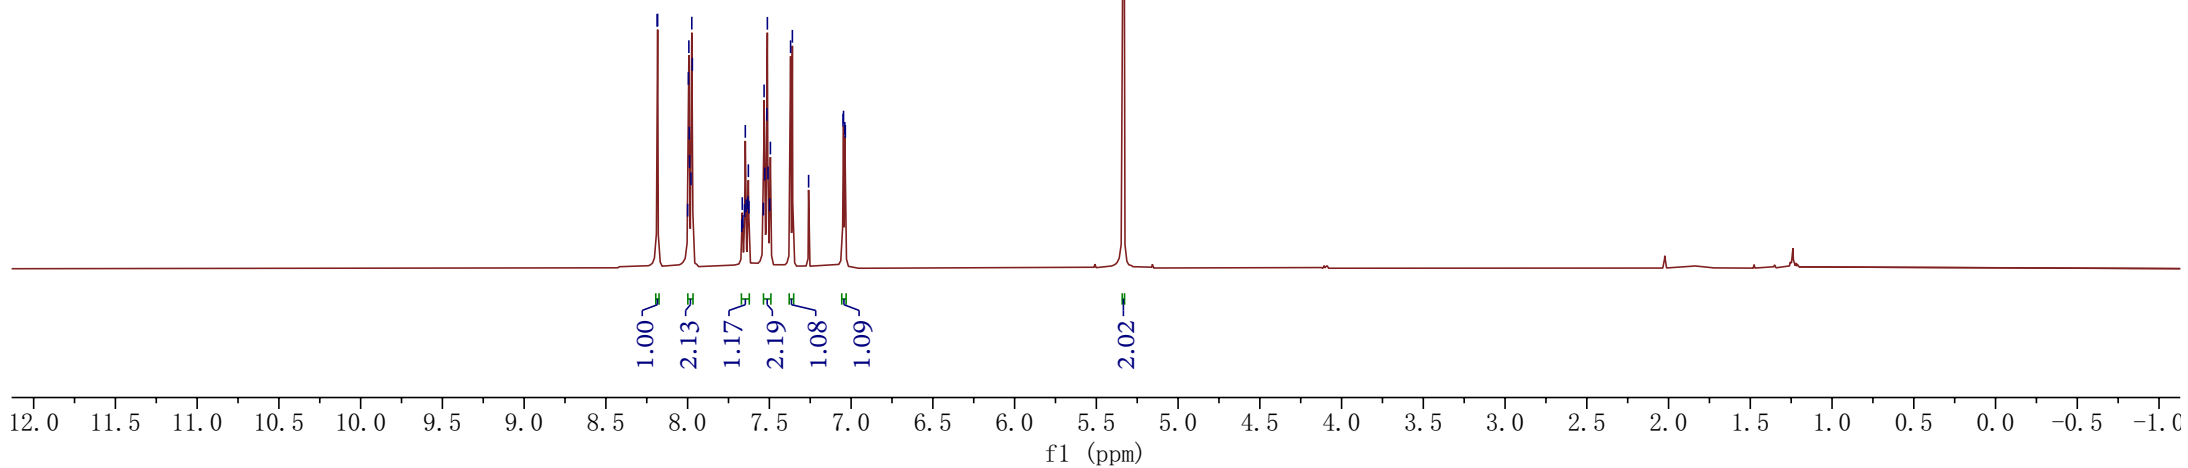

—190.77

—155.94

—149.66

134.62

134.29

129.54

129.18

128.26

123.81

77.48

77.16

76.84

—53.82

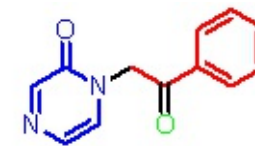

3b'a

<sup>13</sup>C NMR (100 MHz, CDCl<sub>3</sub>)

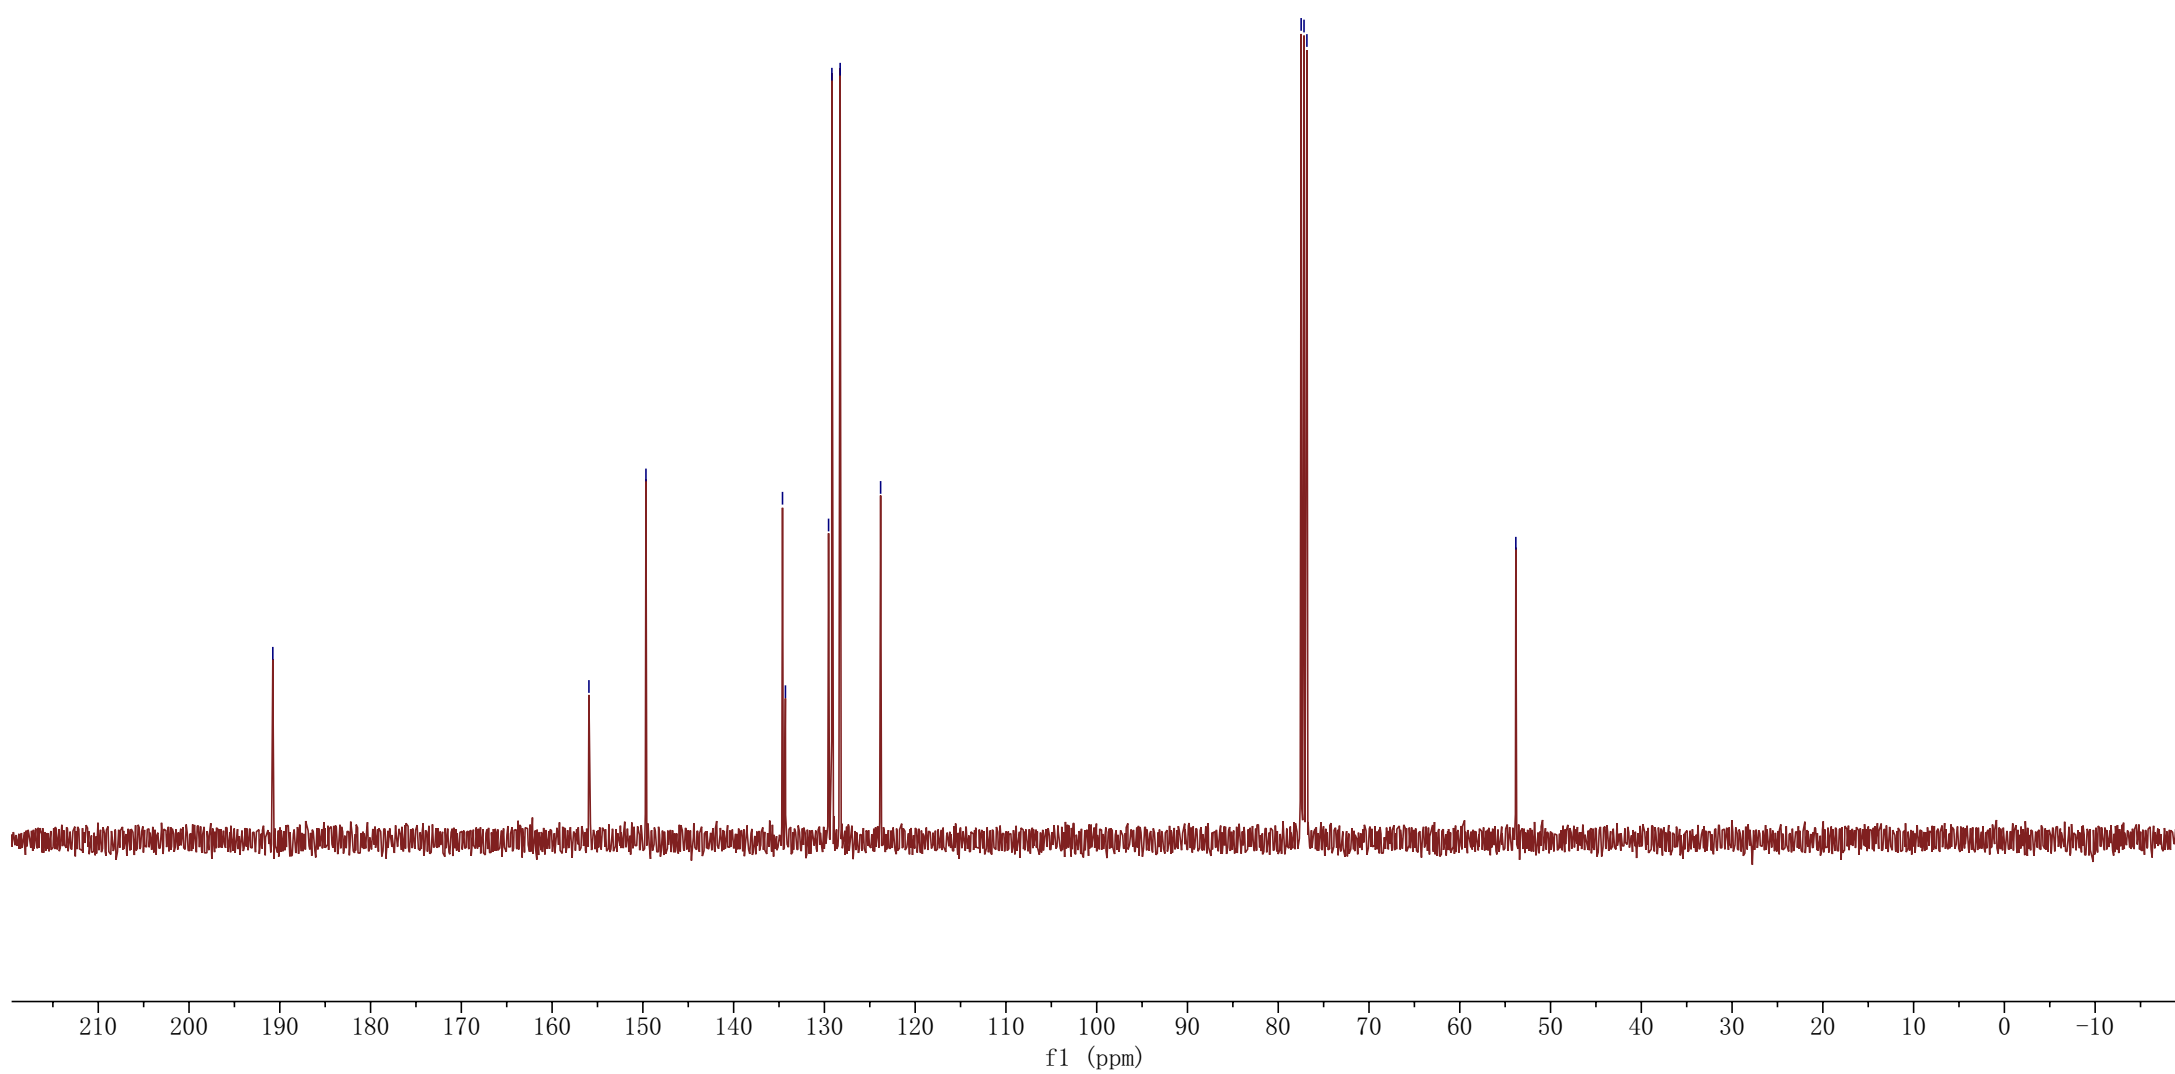

7.999  
7.996  
7.992  
7.978  
7.974  
7.620  
7.616  
7.602  
7.598  
7.510  
7.506  
7.490  
7.471  
7.143  
7.129  
7.124  
7.119  
7.105  
7.100  
7.057  
7.054  
7.050  
7.040  
7.036  
7.032  
6.161  
6.150  
6.143  
6.132  
6.125  
6.114  
5.428

7.999  
7.996  
7.992  
7.978  
7.974  
7.620  
7.616  
7.602  
7.598  
7.510  
7.506  
7.490  
7.471  
7.260  
7.143  
7.129  
7.124  
7.119  
7.105  
7.100  
7.057  
7.054  
7.050  
7.040  
7.036  
7.032

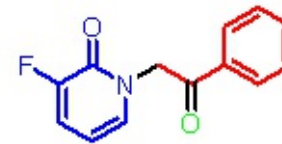

3c'a

<sup>1</sup>H NMR (400 MHz, CDCl<sub>3</sub>)

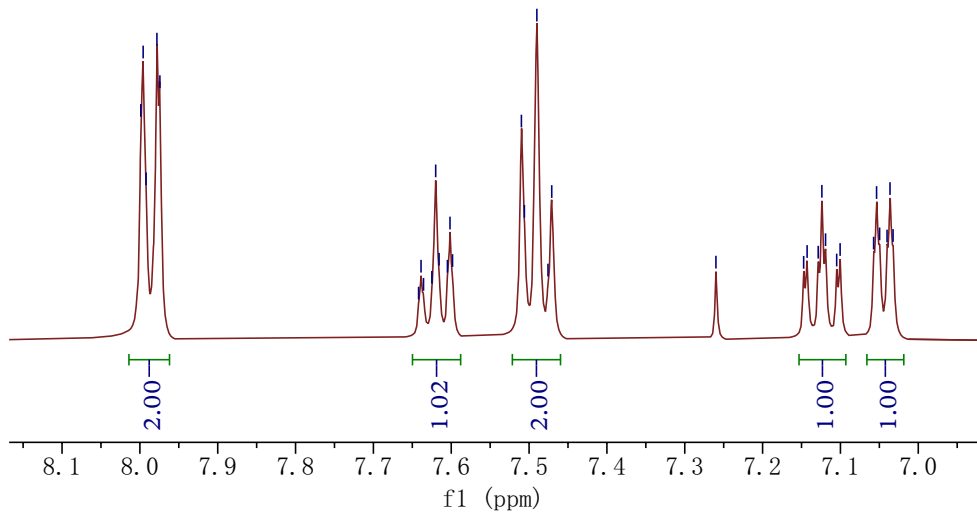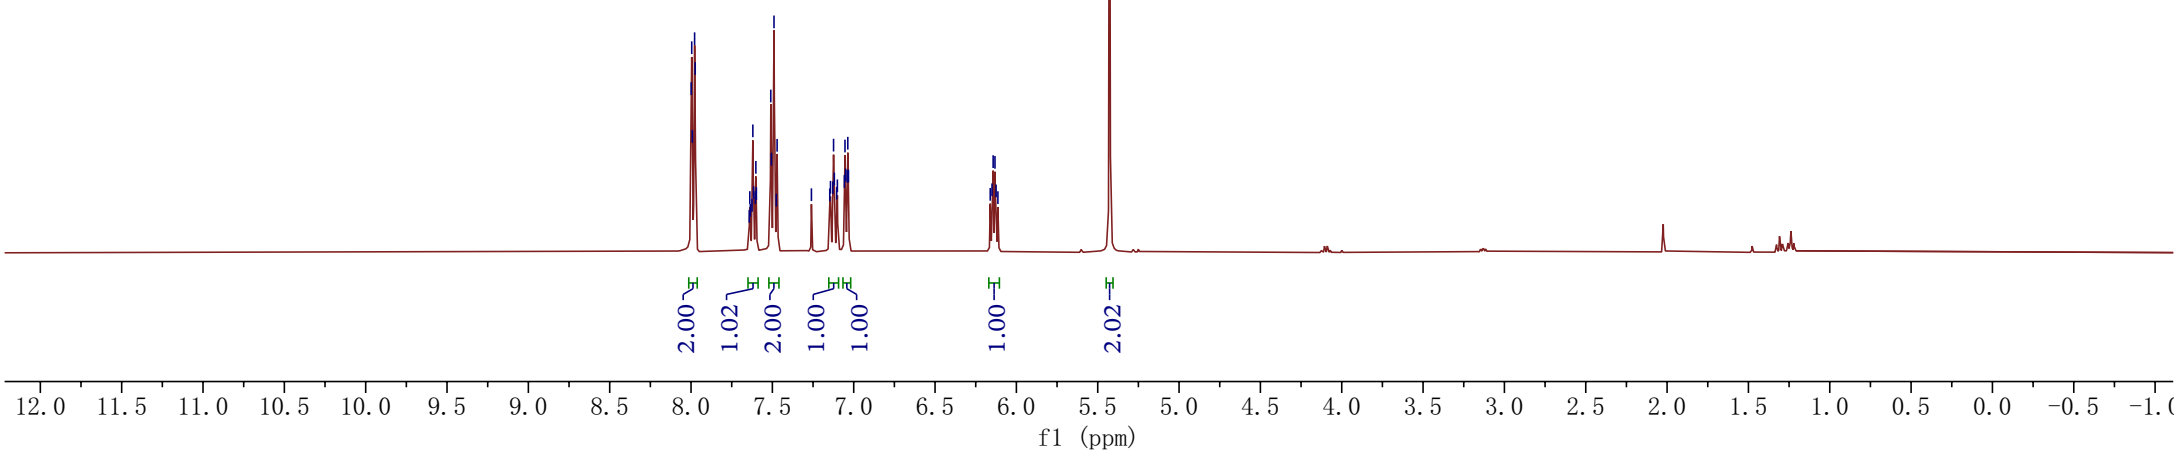

—191.72

156.47  
156.21  
153.73  
151.25  
134.53  
134.33  
133.76  
133.71  
129.05  
128.25  
120.86  
120.70

103.97  
103.91

77.48  
77.16  
76.84

54.38  
54.36

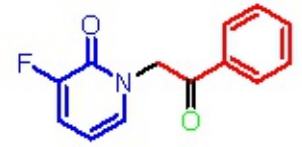

3c'a

<sup>13</sup>C NMR (100 MHz, CDCl<sub>3</sub>)

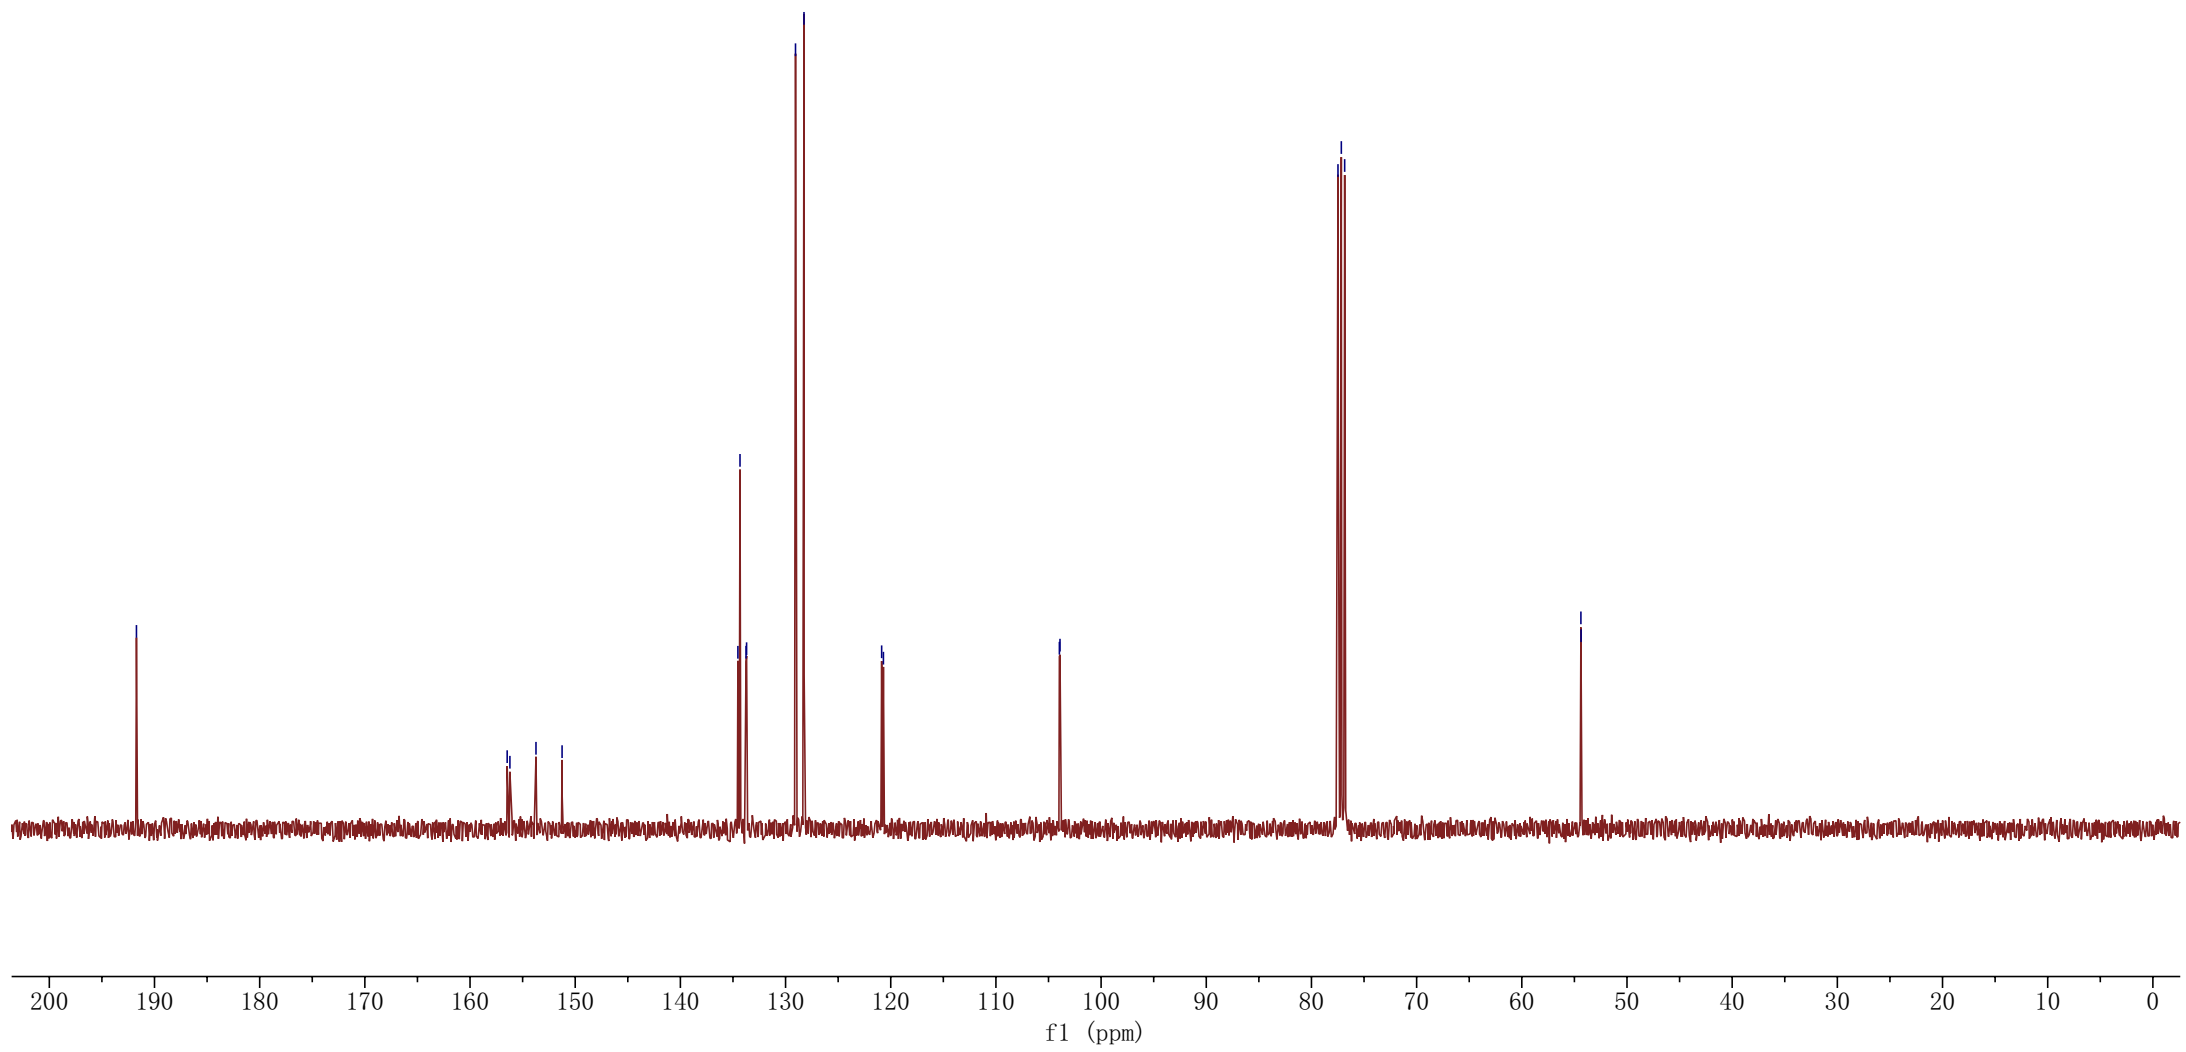

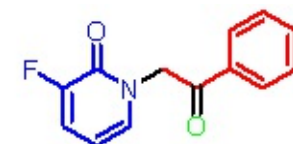

3c'a

<sup>19</sup>F NMR (376 MHz, CDCl<sub>3</sub>)

--130.469

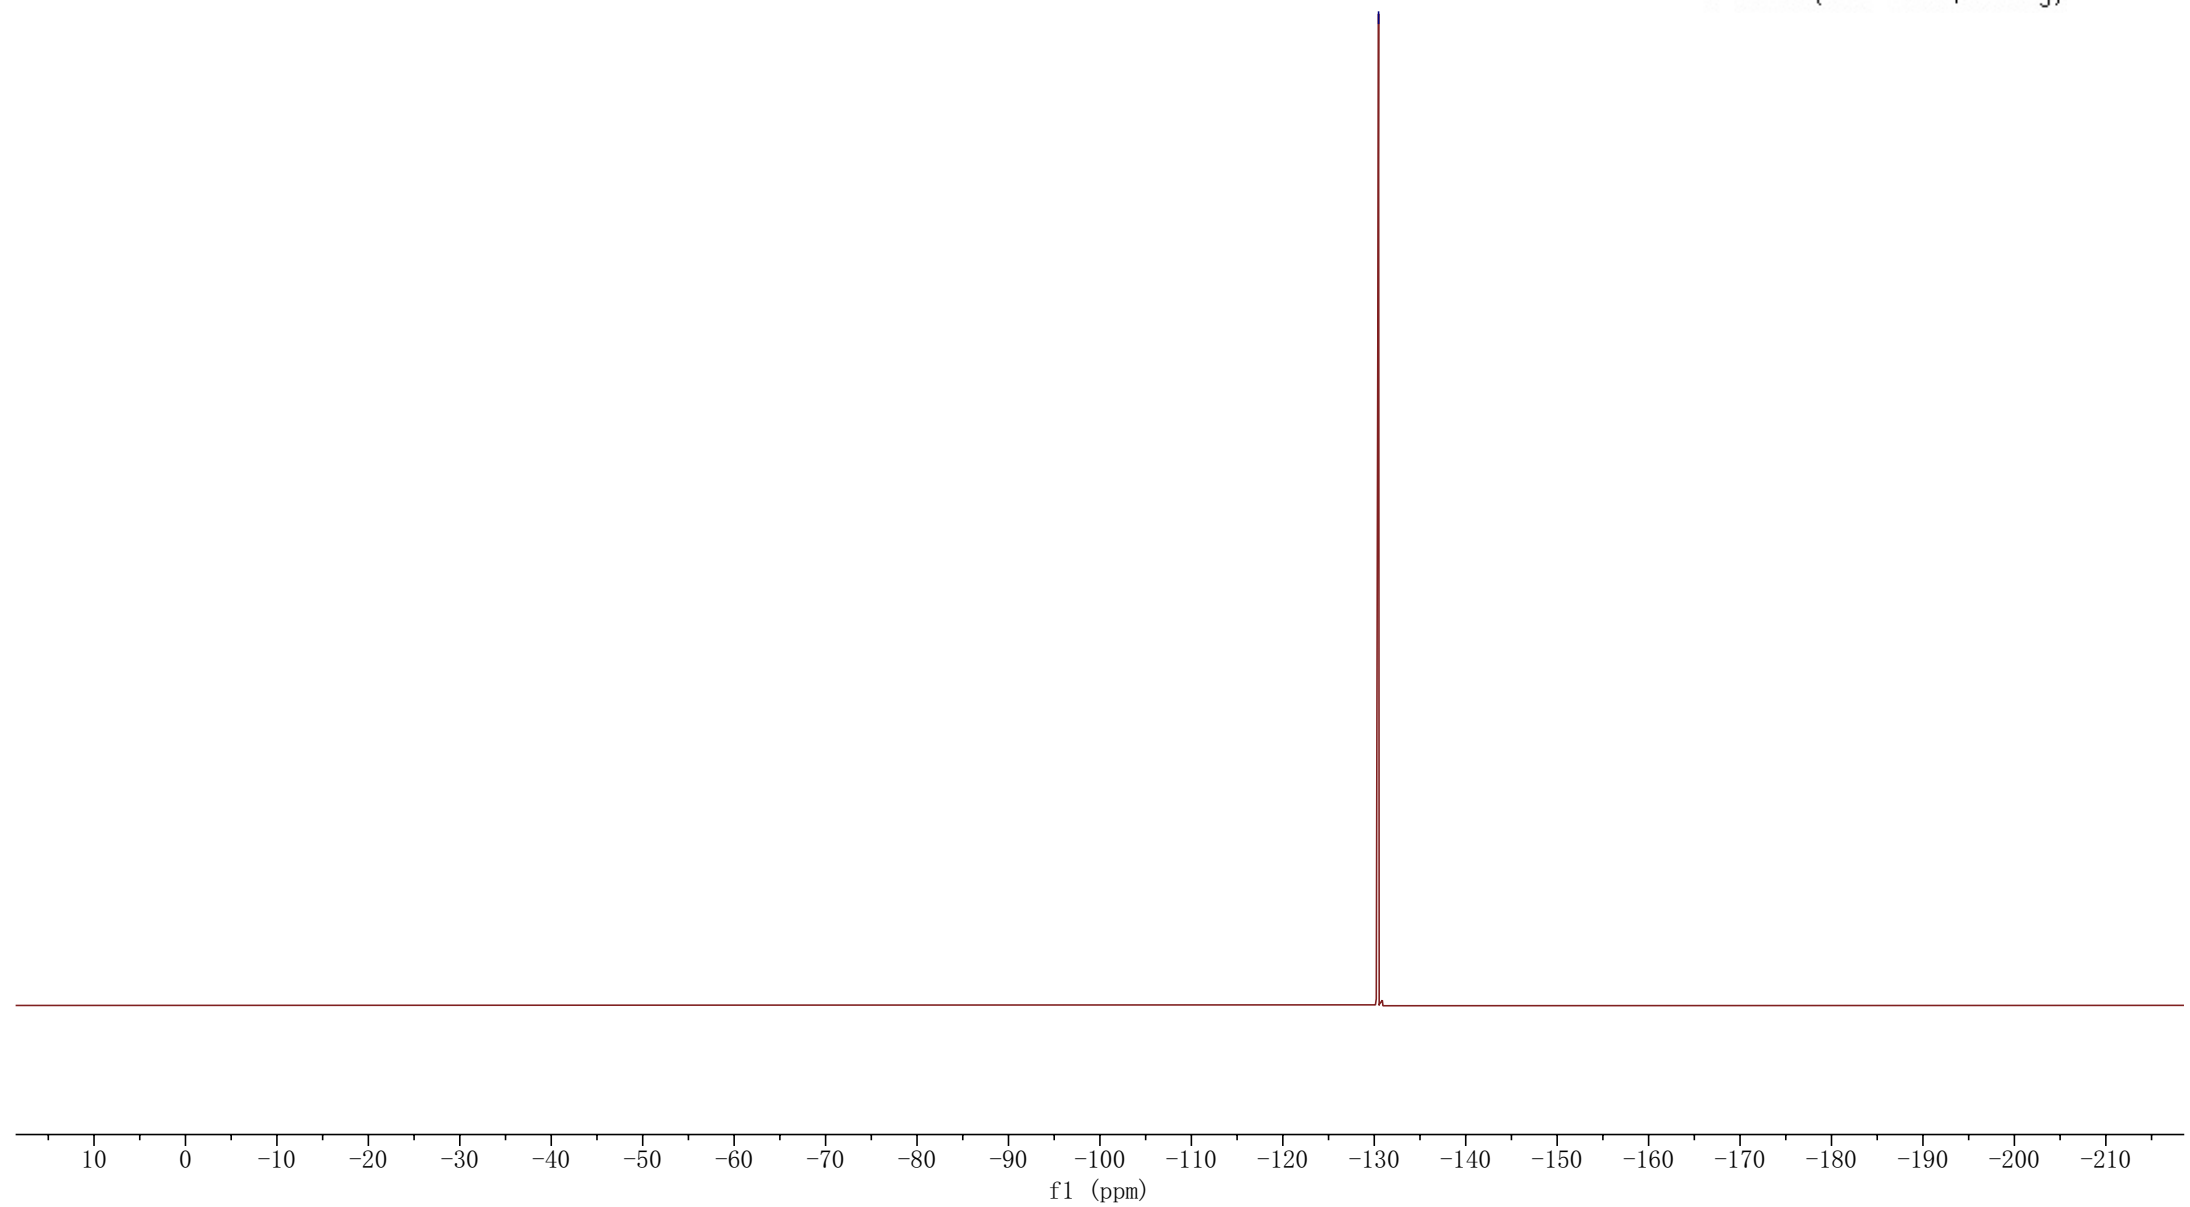

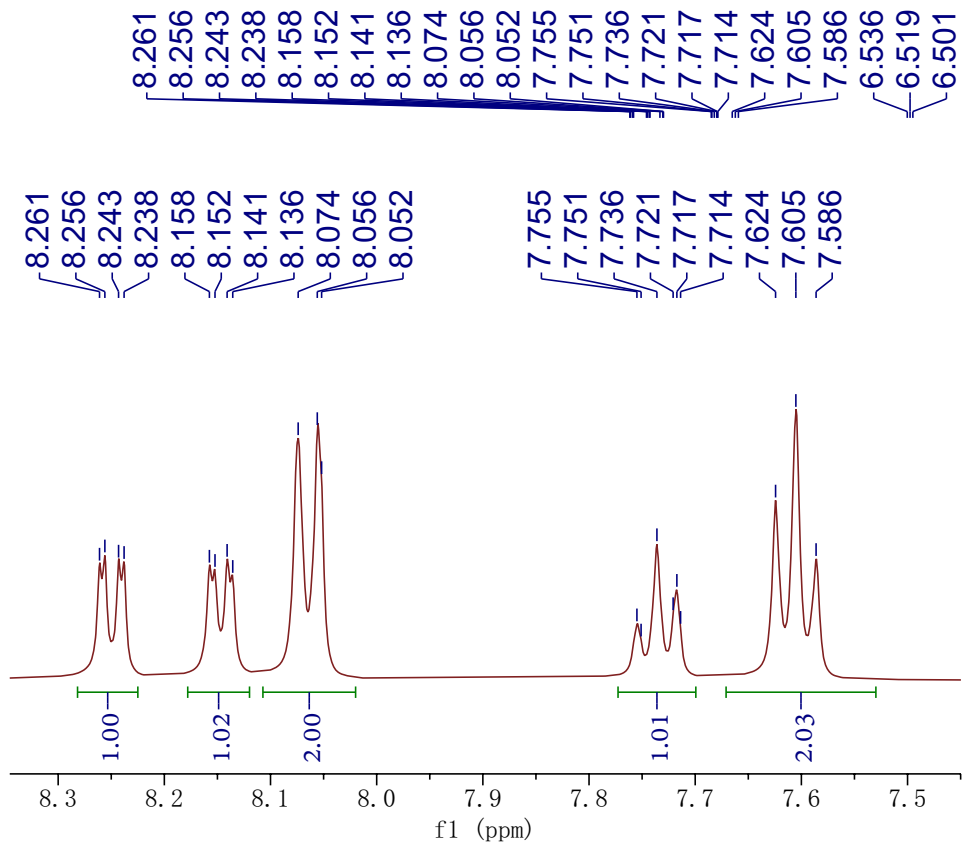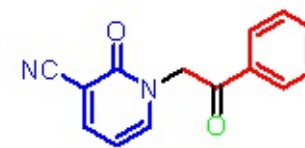

3d'a

<sup>1</sup>H NMR (400 MHz, DMSO-*d*<sub>6</sub>)

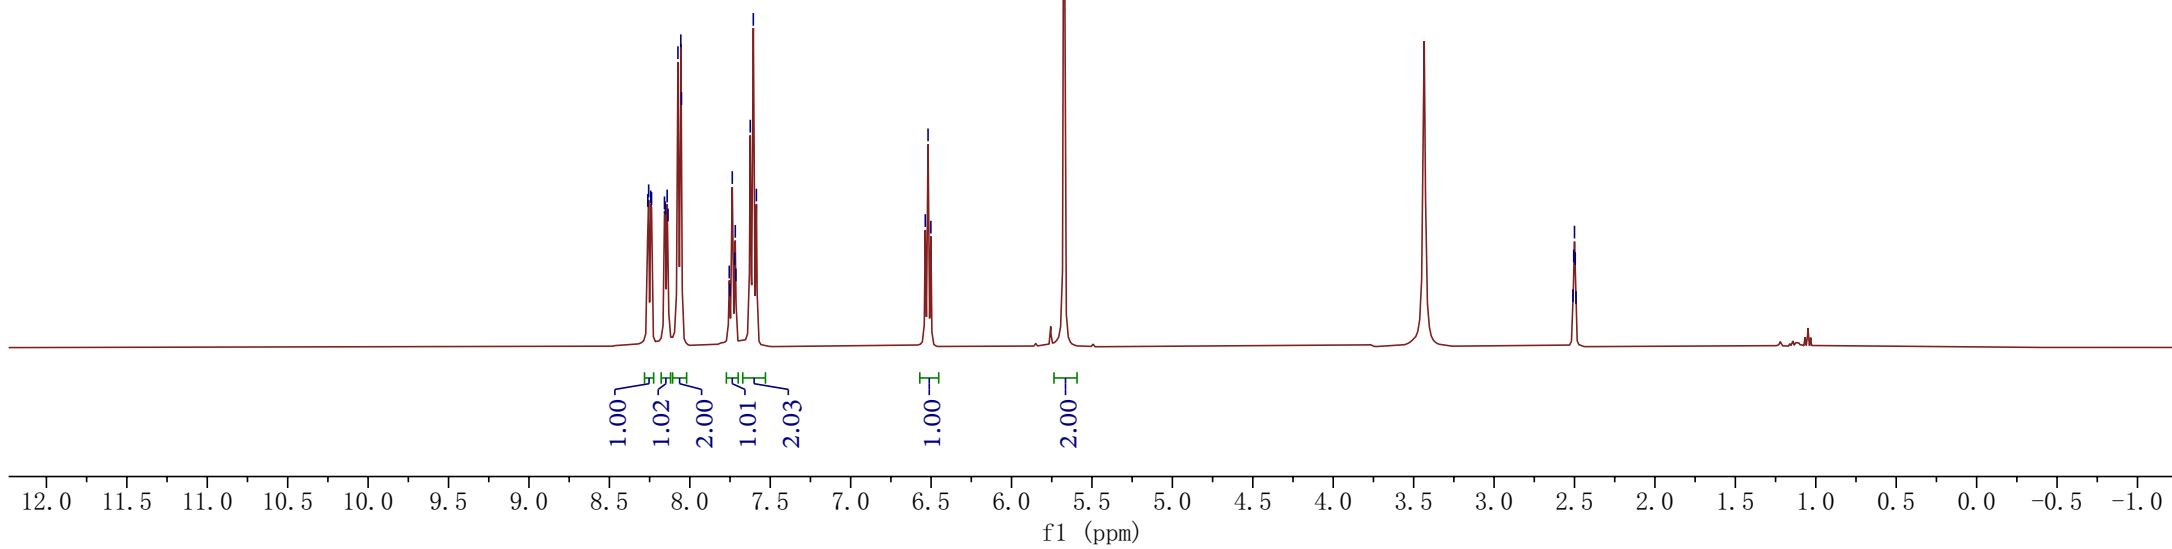

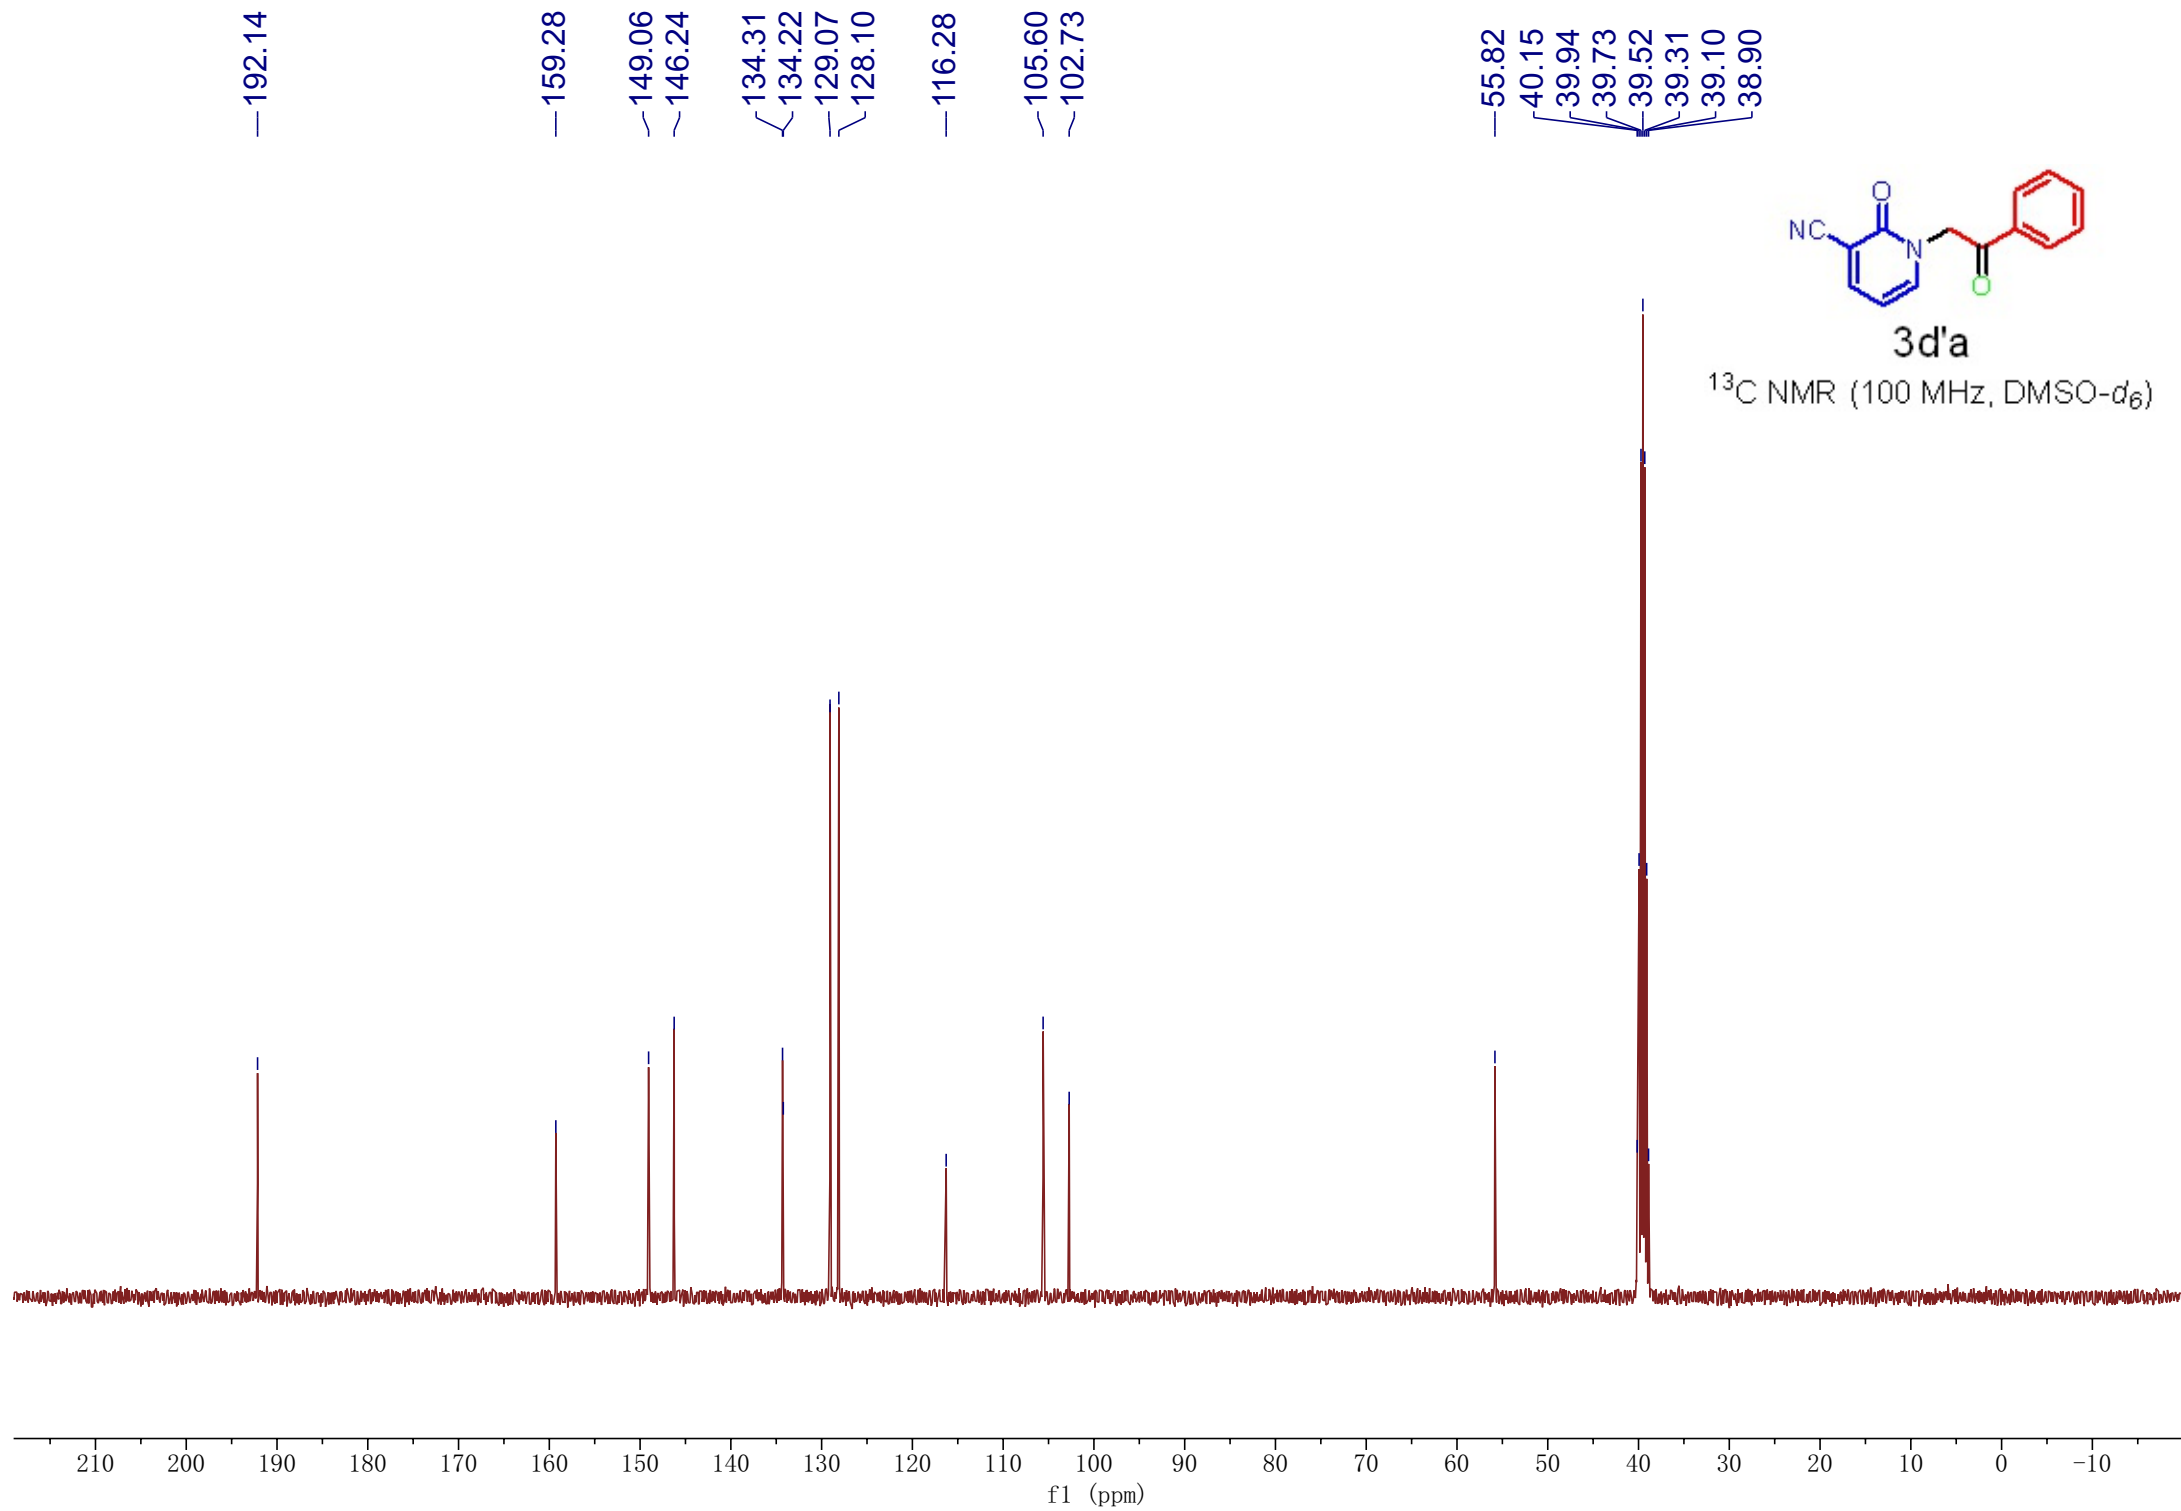

8.124  
8.120  
8.104  
8.102  
8.099  
8.099  
7.812  
7.528  
7.524  
7.511  
7.507  
7.502  
7.486  
7.481  
7.295  
7.290  
7.279  
7.275  
7.270  
7.259  
7.254  
7.246  
7.241  
7.237  
7.228  
7.224  
7.224  
7.221  
7.216  
7.156  
7.138  
7.134  
7.125  
7.119  
7.096  
7.092  
7.088  
7.080  
7.074  
7.067  
4.893  
4.885  
4.870  
4.862  
4.246  
4.238  
4.212  
4.204  
3.439  
3.416  
3.406  
3.383  
0.495  
0.475  
0.455  
0.168  
0.148  
0.128  
0.107

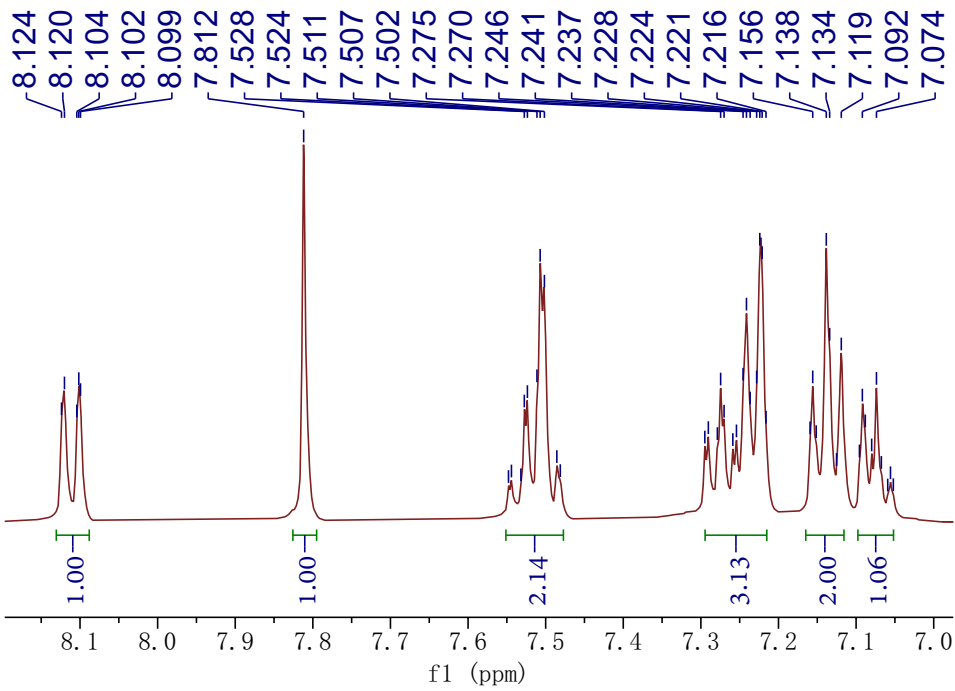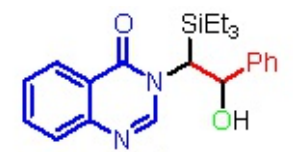

4

<sup>1</sup>H NMR (400 MHz, CDCl<sub>3</sub>)

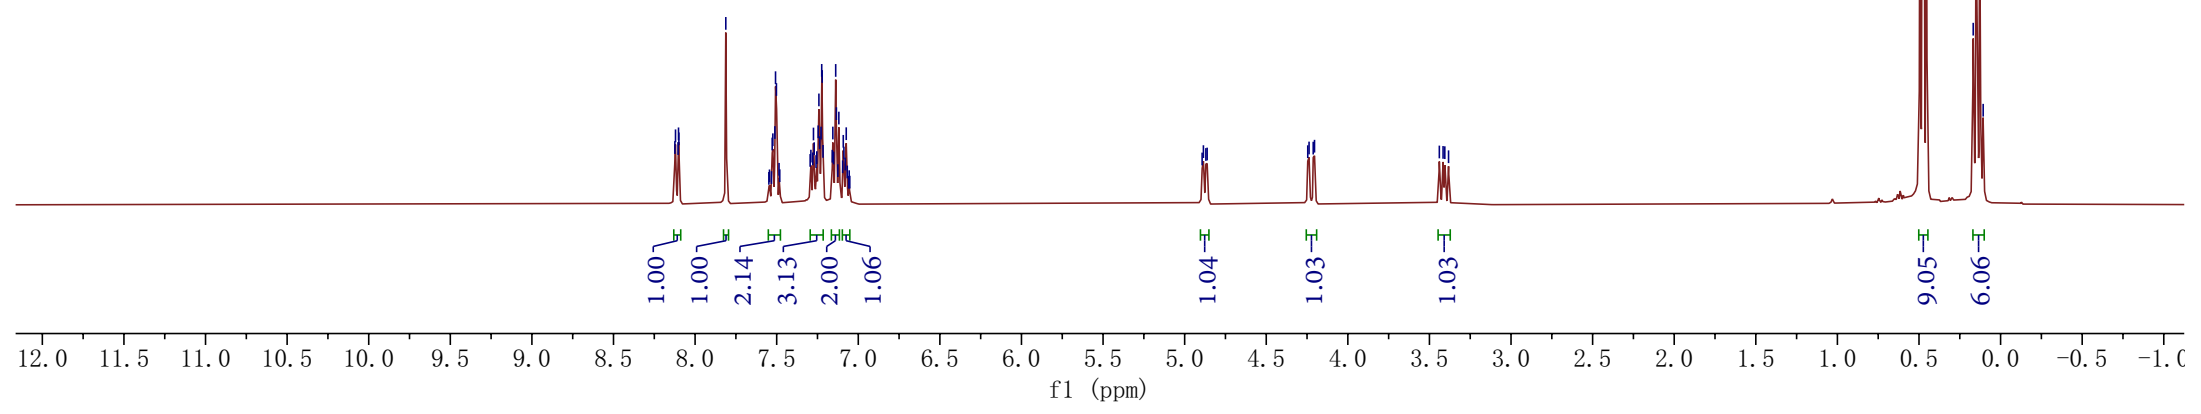



161.26  
148.16  
147.65  
141.47  
134.19  
128.51  
128.07  
127.43  
127.07  
126.50  
125.86  
121.92

77.48  
77.16  
76.84  
72.04

55.32

6.44  
4.41

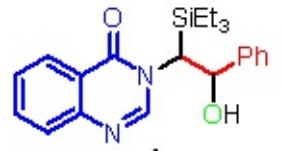

4

<sup>13</sup>C NMR (100 MHz, CDCl<sub>3</sub>)

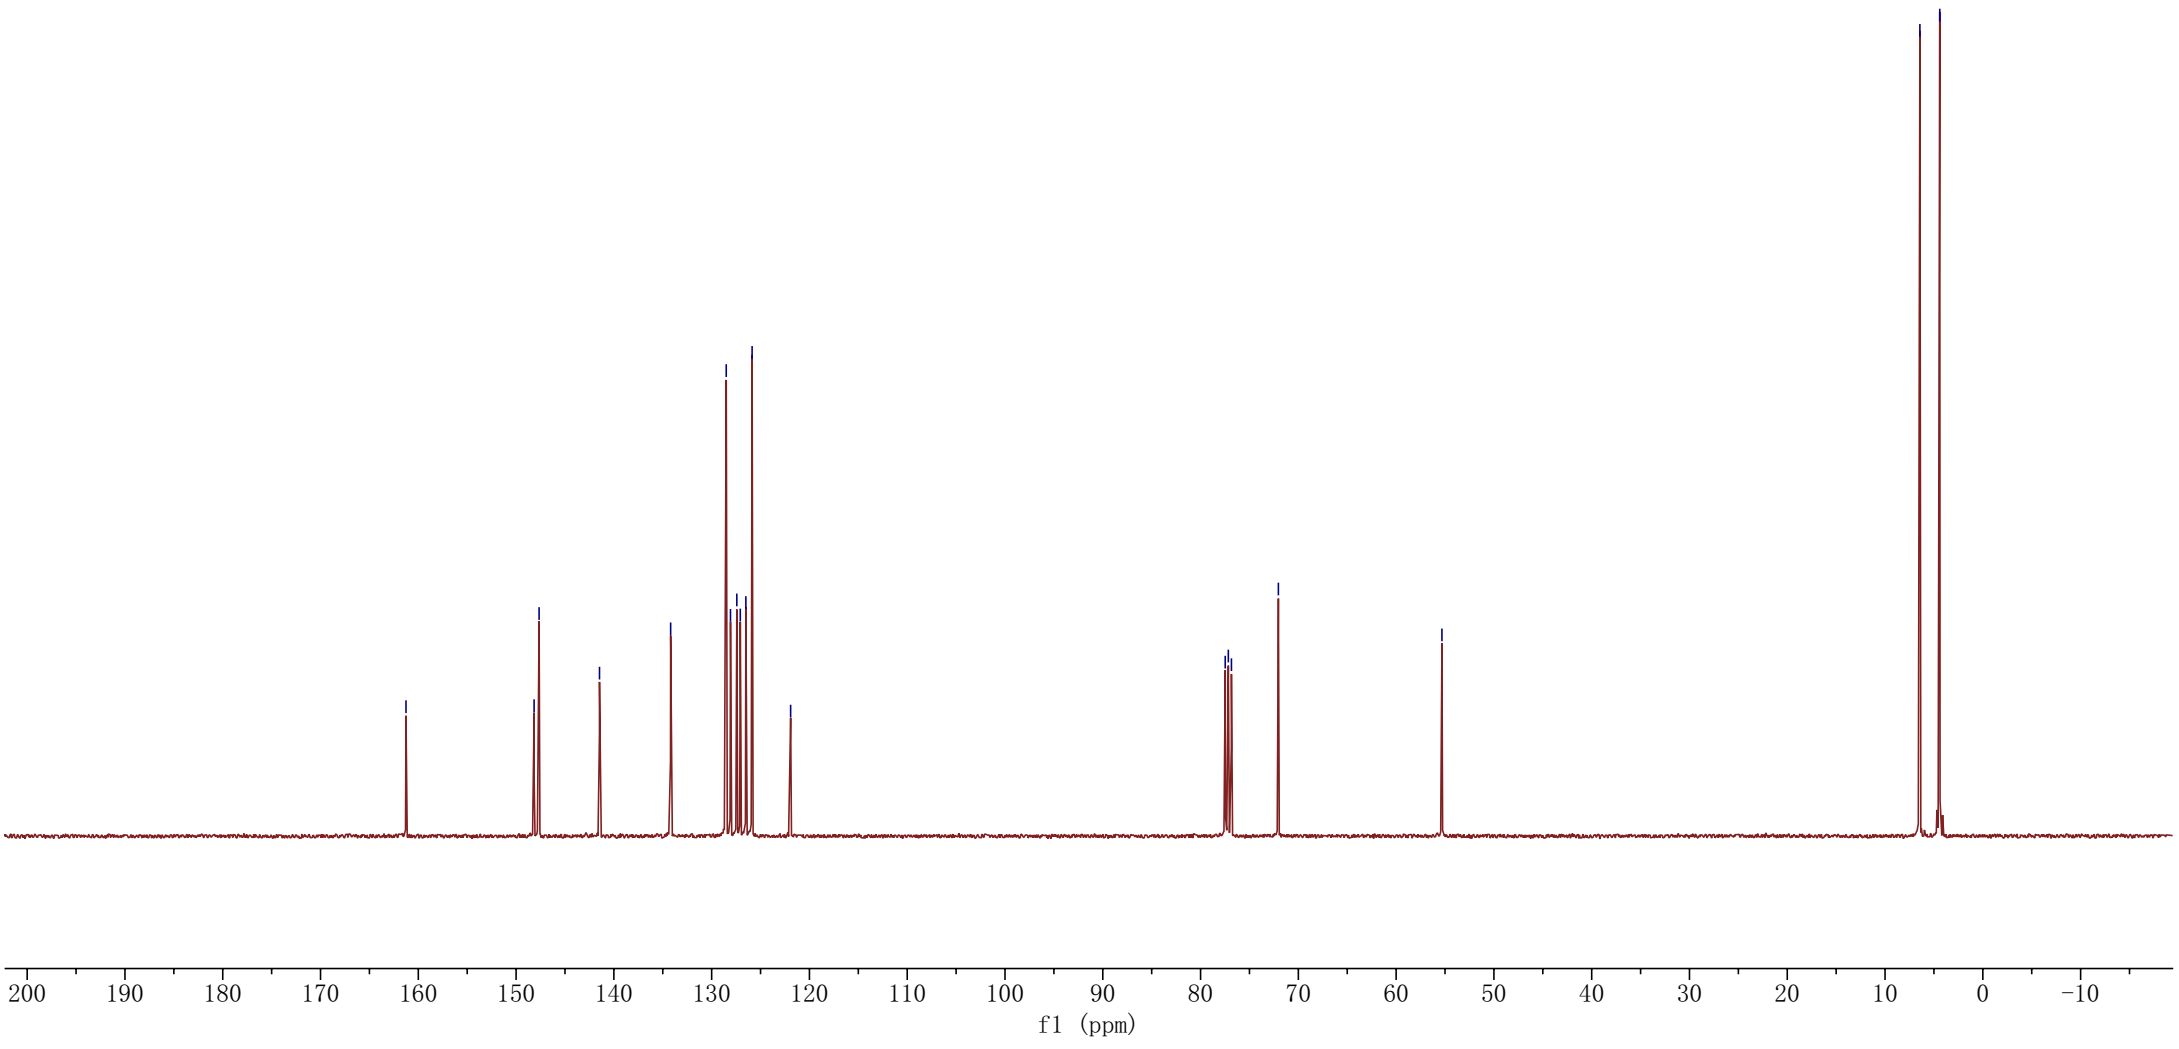

8.340  
8.320  
8.047  
8.029  
8.025  
8.009  
7.964  
7.752  
7.747  
7.731  
7.727  
7.711  
7.707  
7.690  
7.660  
7.641  
7.623  
7.535  
7.516  
7.498  
7.480  
7.446  
7.434  
7.428  
7.421  
7.410  
7.260  
5.444

8.340  
8.320  
8.047  
8.029  
8.025  
8.009  
7.964  
7.752  
7.747  
7.731  
7.727  
7.711  
7.707  
7.690  
7.660  
7.641  
7.623  
7.535  
7.516  
7.498  
7.480  
7.446  
7.434  
7.428  
7.421

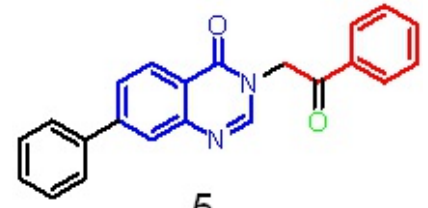

<sup>1</sup>H NMR (400 MHz, CDCl<sub>3</sub>)

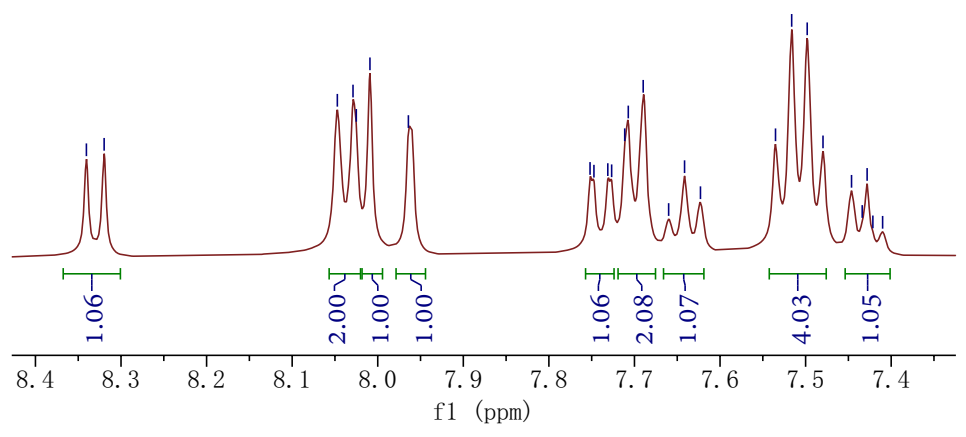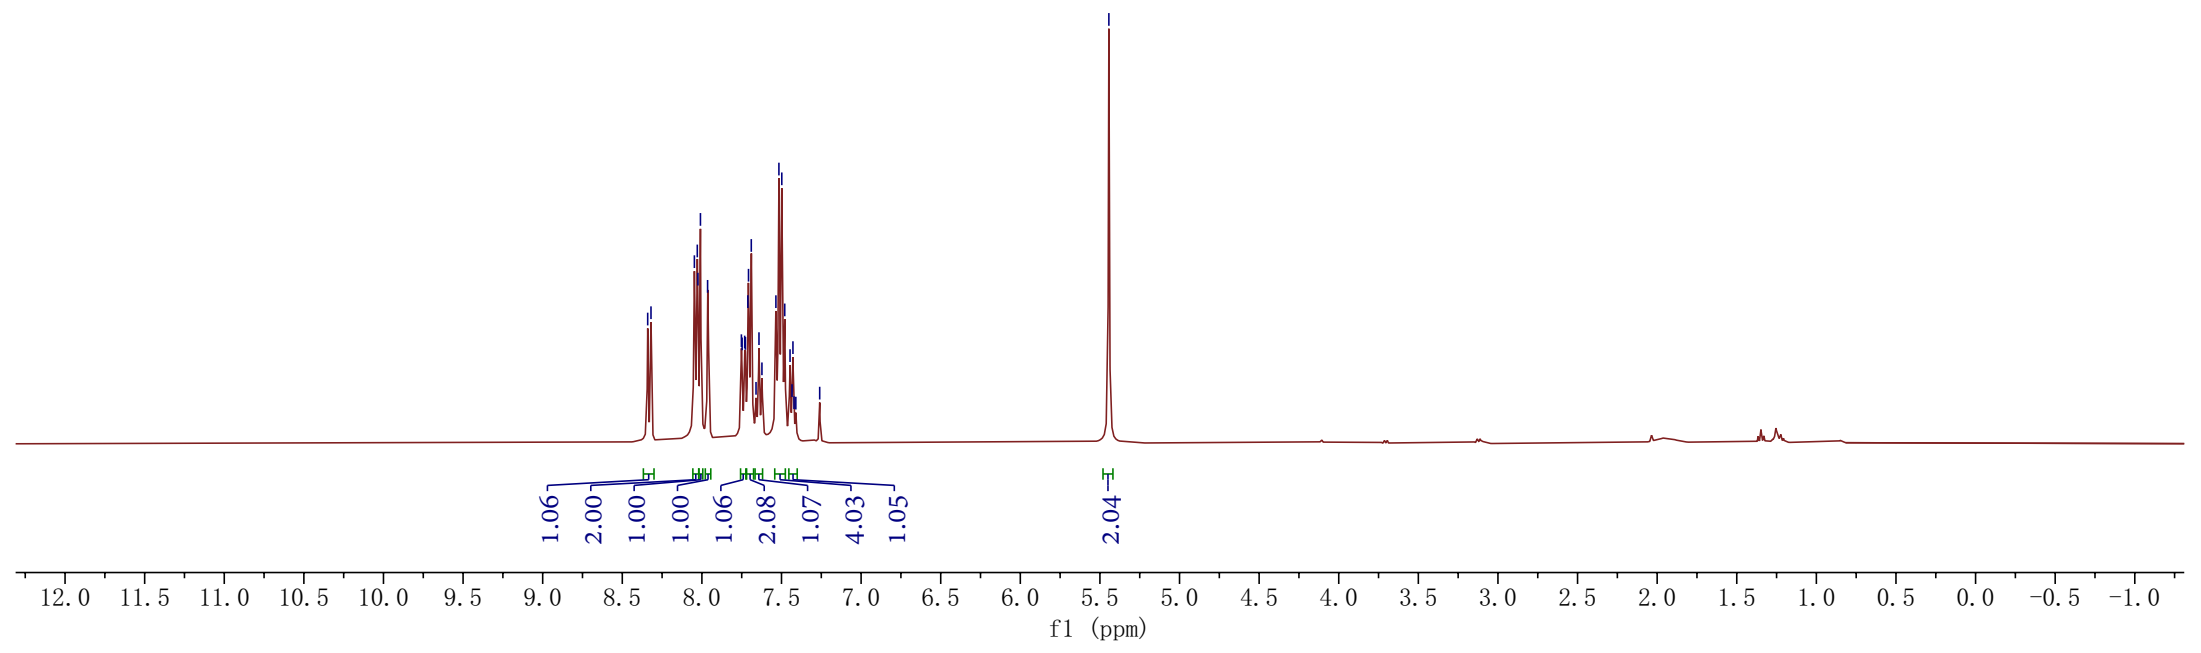

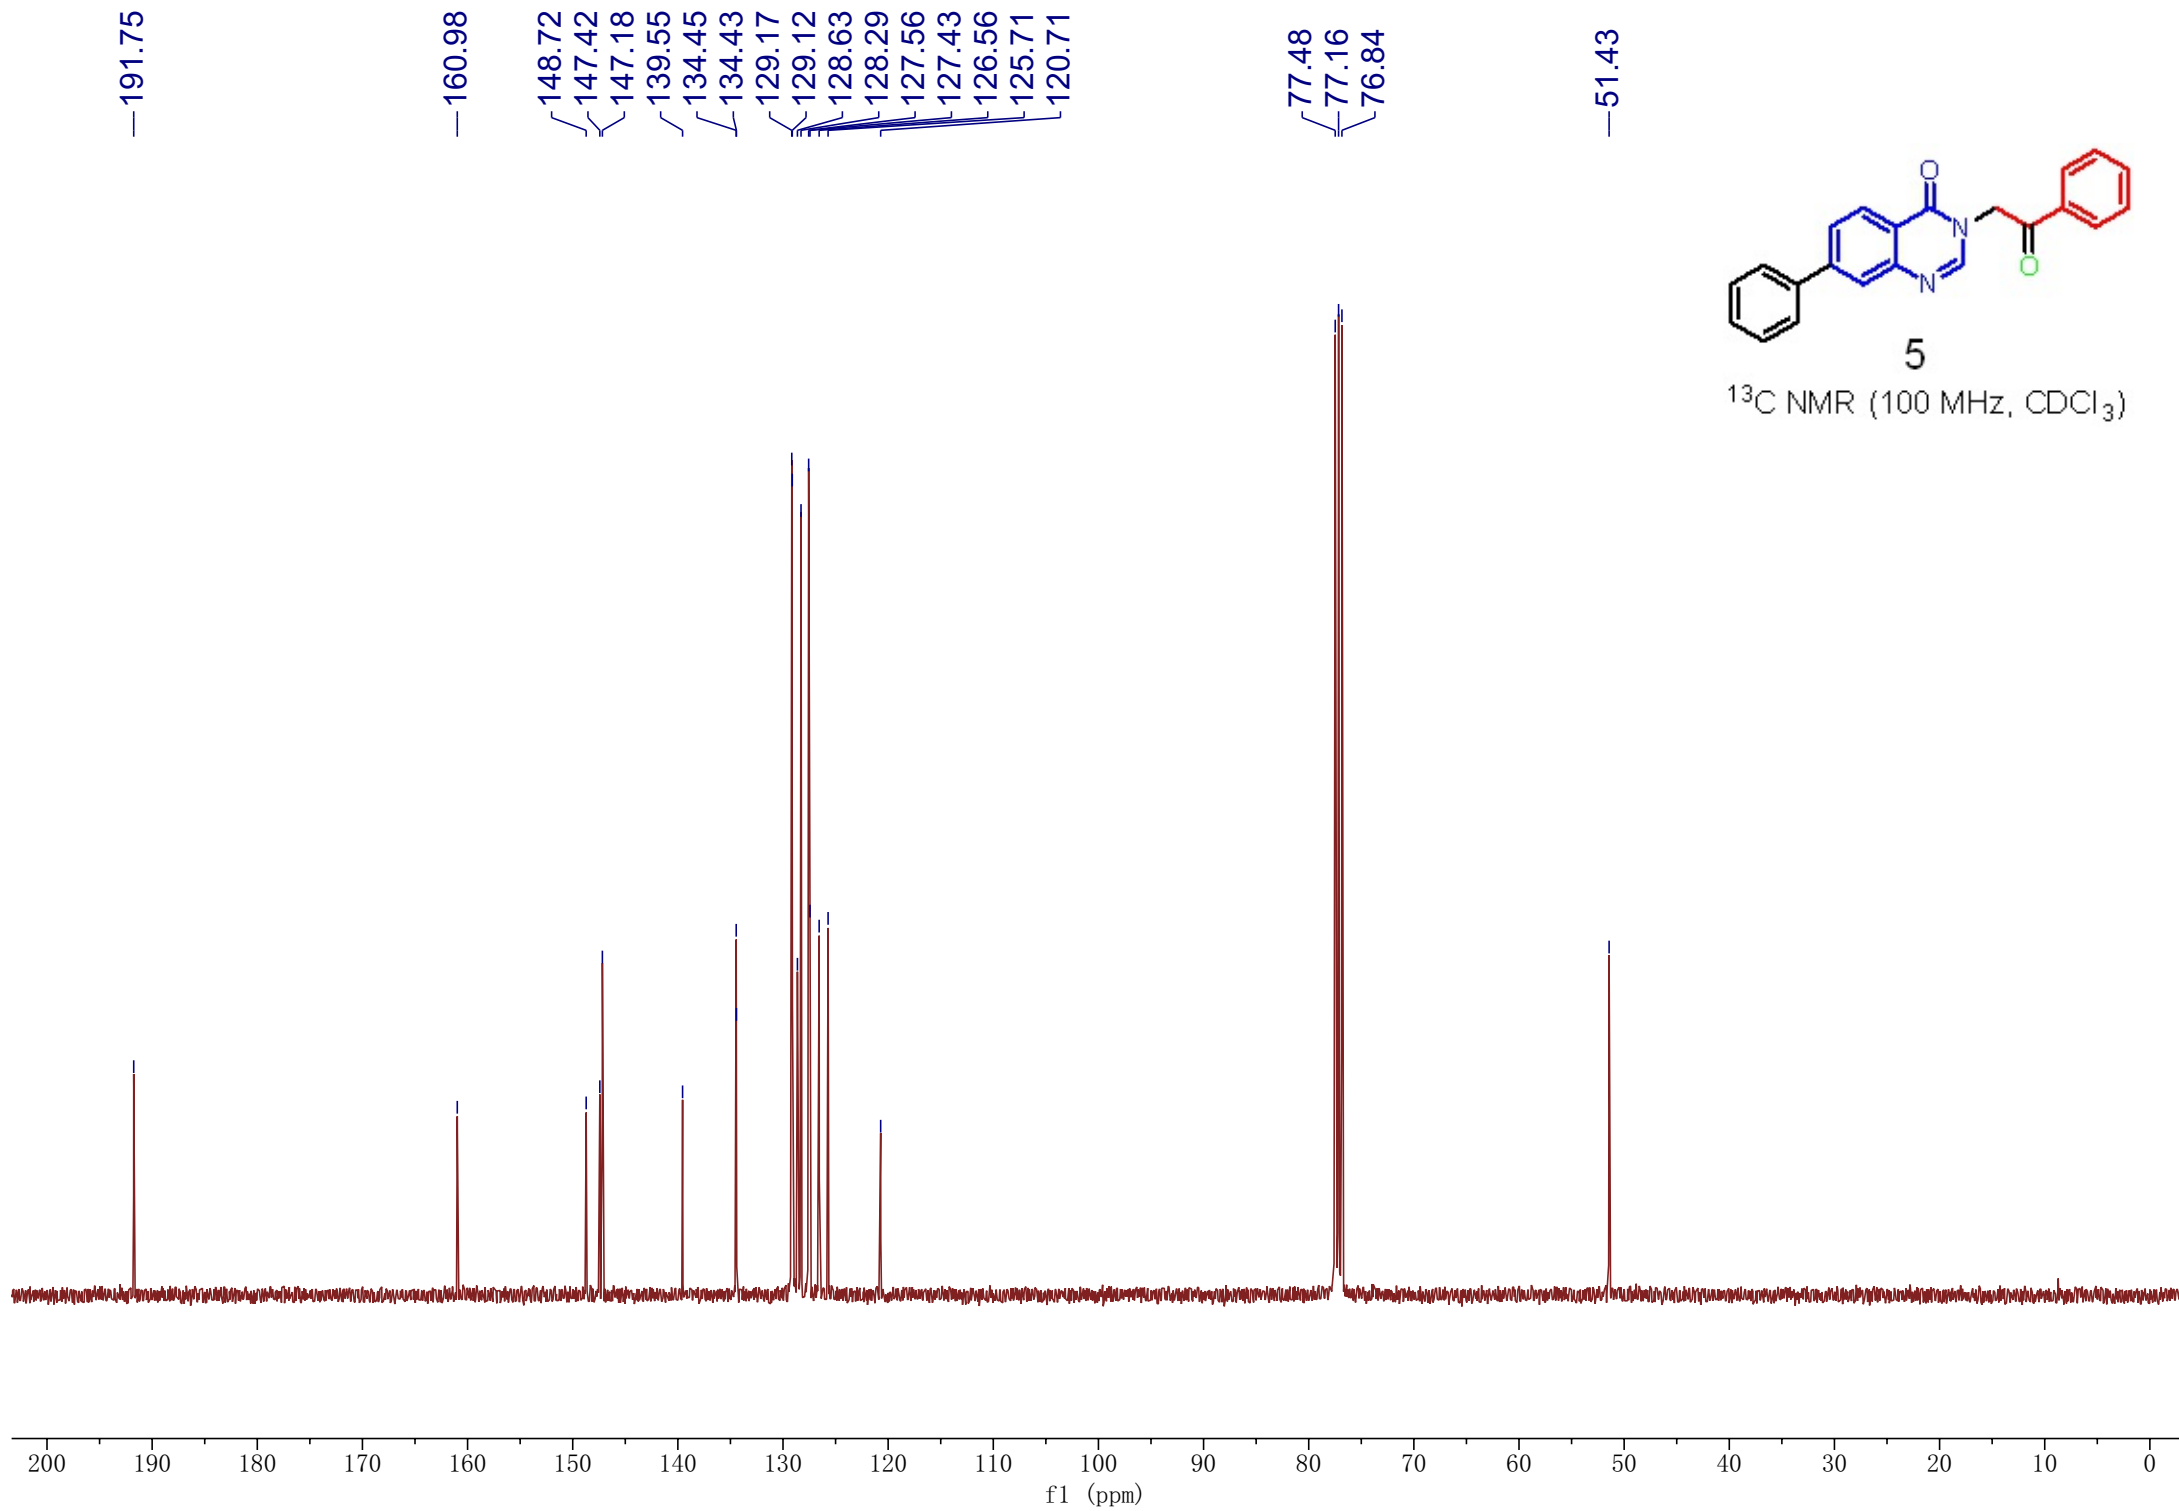

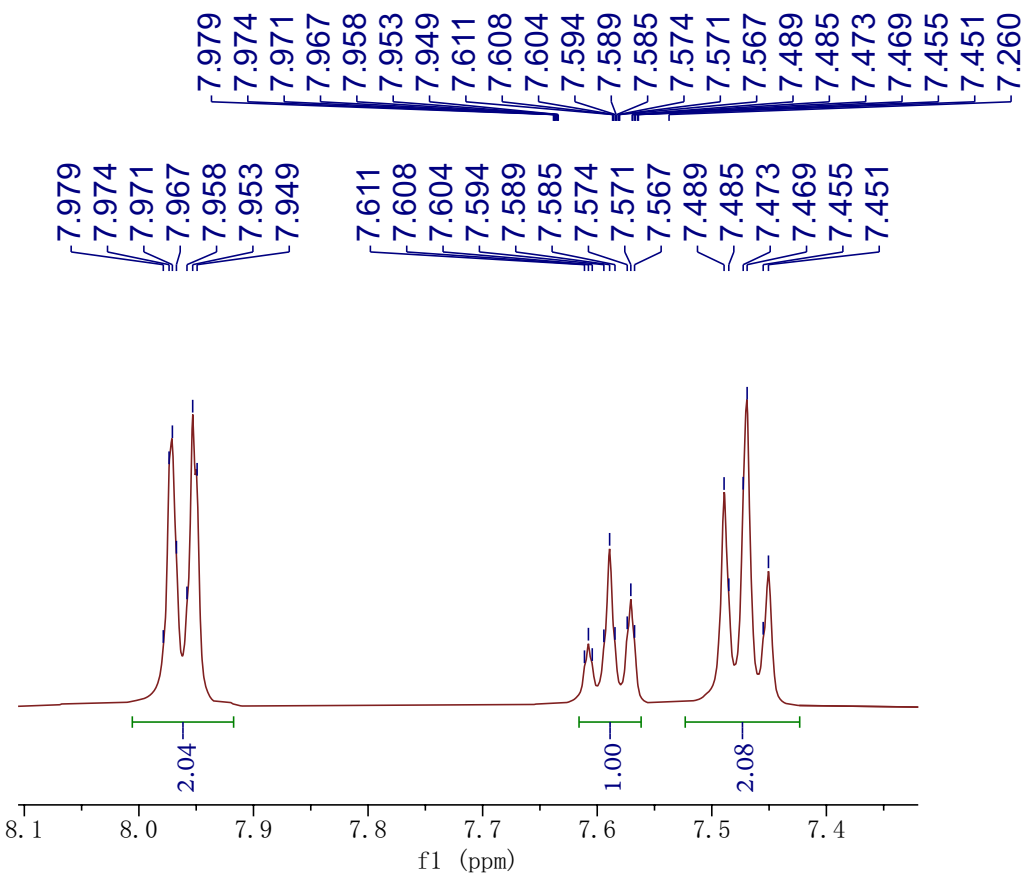

—4.447

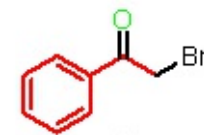

8

<sup>1</sup>H NMR (400 MHz, CDCl<sub>3</sub>)

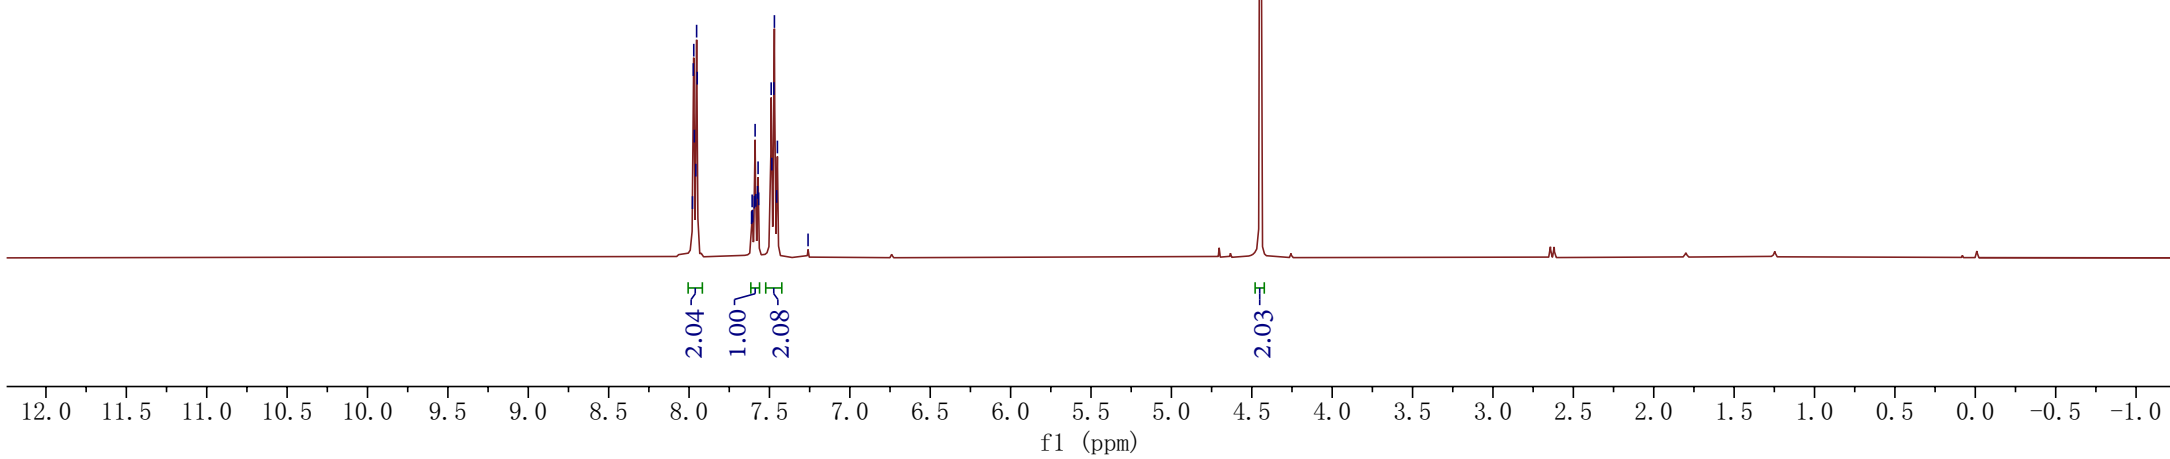

—191.30

134.00  
133.98  
128.94  
128.90

77.48  
77.16  
76.84

—31.14

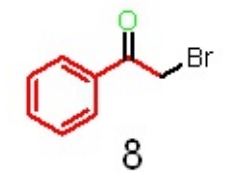

<sup>13</sup>C NMR (100 MHz, CDCl<sub>3</sub>)

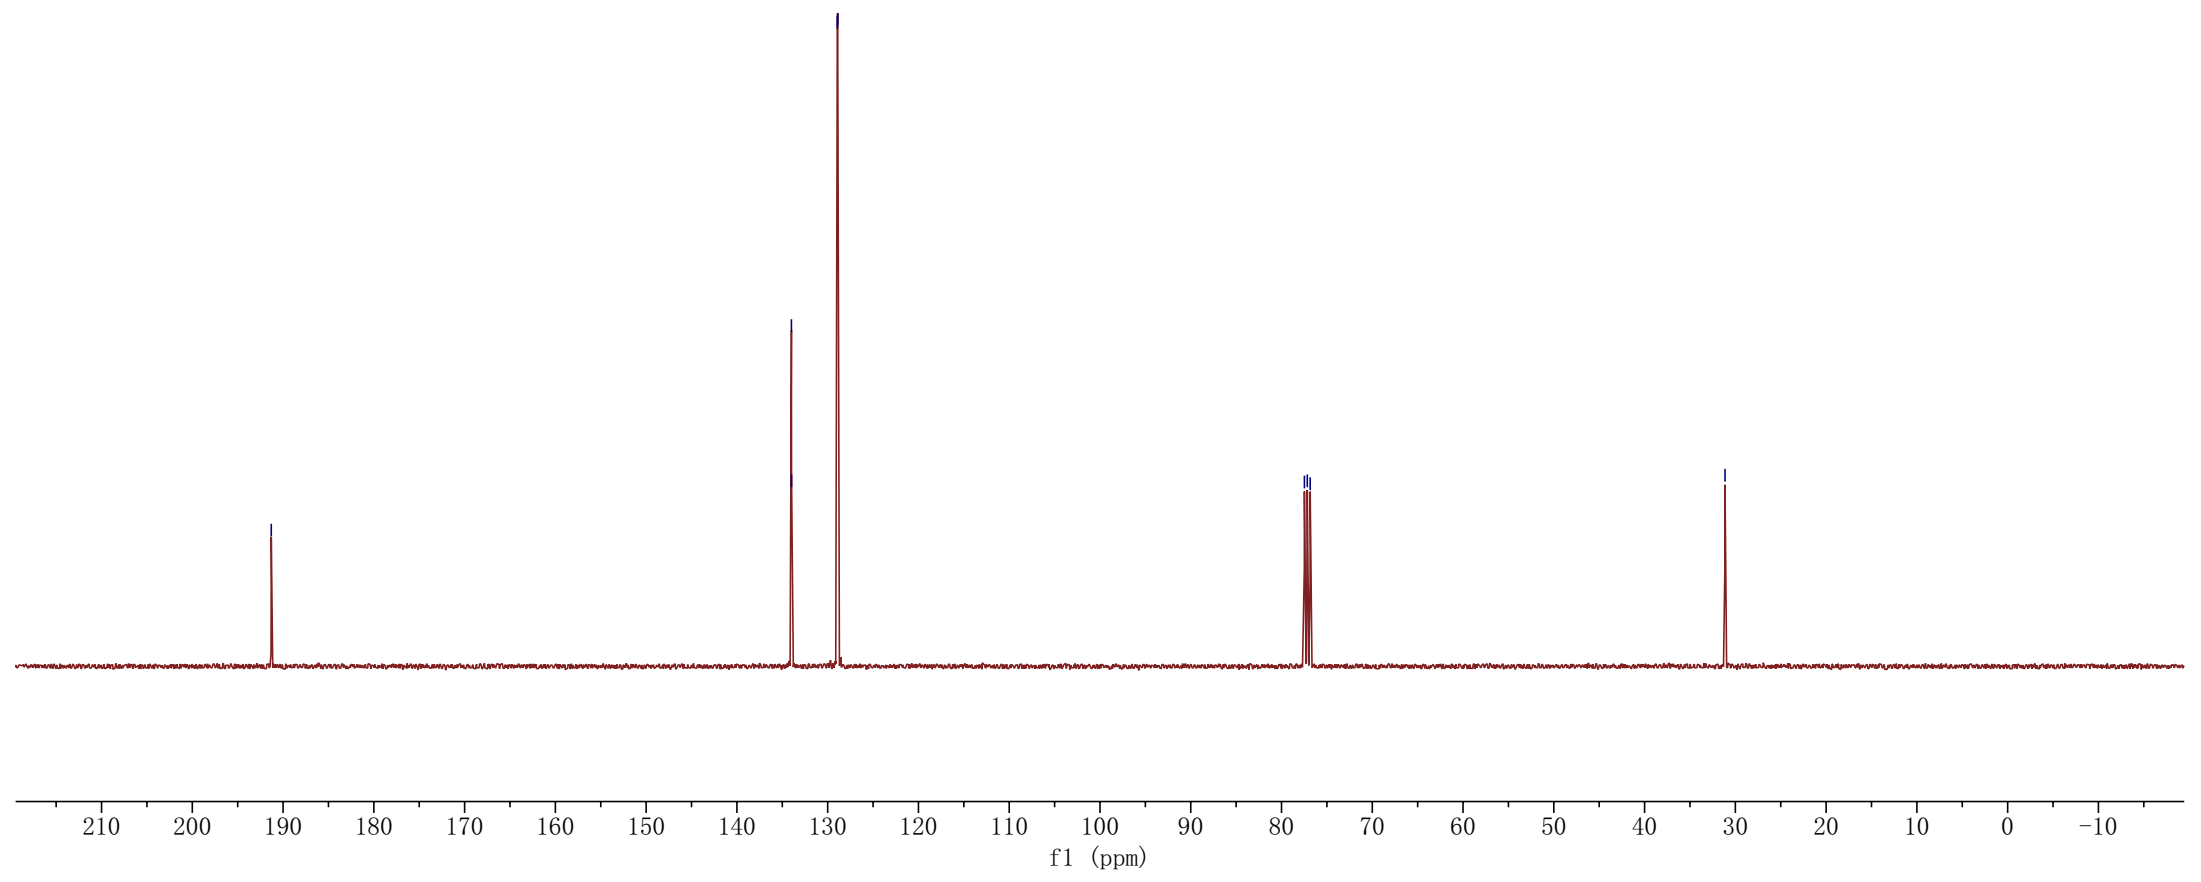

Supplement: d4qo00369a1.pdf [file d4qo00369a1.pdf]
